# Supplementary material for: Assessing the genetic diversity of Cu resistance in mine tailings through high-throughput recovery of full-length copA genes
Source: PubMed Central journal article supplement (PMC4541151; doi:10.1038/srep13258), 2015-08-19
Supplement: srep13258-s1.pdf [file srep13258-s1.pdf]

**Assessing the genetic diversity of Cu resistance in mine tailings through high-throughput recovery of full length *copA* genes**

Xiaofang Li<sup>1</sup>, Yong-Guan Zhu<sup>2</sup>, Babak Shaban<sup>3</sup>, Timothy J. C. Bruxner<sup>4</sup>, Philip L. Bond<sup>5</sup>, Longbin Huang<sup>1\*</sup>

<sup>1</sup>Centre for Mined Land Rehabilitation, Sustainable Minerals Institute, The University of Queensland, QLD 4072, Australia

<sup>2</sup>Institute of Urban Environment, Chinese Academy of Sciences, Xiamen, 10081, China

<sup>3</sup>Australian Genomics Research Facility, Parkville, Melbourne 3000, Australia

<sup>4</sup>Institute for Molecular Bioscience, The University of Queensland, QLD 4072, Australia

<sup>5</sup>Advanced Water Management Centre, The University of Queensland, QLD 4072, Australia

**\*Corresponding authors**

Longbin Huang: l.huang@uq.edu.au; also to Yong-Guan Zhu: ygzhu@iue.ac.cn

**Running title: Metagenomics for *copA* diversity in mine tailings**

16

84

455

|             |             |            |
|-------------|-------------|------------|
| GMTCASC SAR | -----       | VLVVACPCA- |
| GMTCASCSSR  | GMTCASCVGRV | VLVVACPCA- |
| GMTCASCSSR  | GMTCASCVGRV | VLVVACPCA- |
| GMSCASCVGR  | GMTCASCVGRV | VLIIACPCA- |
| GMGCAACAGR  | -----       | VLIIACPCA- |
| GMTCAMCVKS  | -----       | VLVVACPCA- |
| GMTCASCAGR  | -----       | VLVIACPCS- |
| GMTCANCSAR  | -----       | VLVIACPCA- |
| GMTCAACSNR  | GMTCAACSNRI | VLVIACPCS- |
| GMTCAACANR  | GMTCAACANRV | VLVIACPCA- |
| GMTCAACAAR  | GMTCAACANRI | VLVIACPCA- |
| G--HACHHEH  | -----       | VLIIACPCA- |
| NMNCAGCVAK  | -----       | VLIIACPCA- |
| GLSCGHCVKR  | GMSCASCVSRV | VLIIACPCA- |
| GLSCGHCVKR  | GMSCASCVTRV | VLIIACPCA- |
| GLSCGHCVAS  | GMSCASCVSKV | VLIIACPCA- |
| GLSCGHCVAS  | GMSCASCVSKV | VLIIACPCA- |
| GMKCAGCVAA  | -----       | VLVVACPCA- |
| HARHQEHGMG  | -----       | VMVIACPHA- |
| ---HQEHGMG  | -----       | VMVIACPHA- |
| ---HSGHQKQ  | -----       | VMVIACPHA- |
| ---CYHGLP   | GVSCAACGWLI | LLVATCPCA- |
| ---CYHGLP   | GISCAACGWLI | MLVATCPCA- |
| -----VNR    | -----       | LLVIGCPGA- |
| WVRCDSTRRAV | -----       | MLLIACPCA- |
| GMACAFCAST  | -----       | VSTIAYPCA- |
| -----       | -----       | FMVVASPCA- |

|        |      |       |
|--------|------|-------|
| LHWHGL | PHQH | AHCHL |
| IHWHGY | YHSH | FHCHD |
| LHWHGL | MHSH | NHCHN |
| IHWHGL | YHAH | FHCHH |
| IHWHGL | YHSH | FHCHQ |
| IHWHGI | YHSH | FHCHL |
| VHWHGL | YHSH | YHCHL |
| LHWHGI | YHSH | YHCHL |
| IHWHGI | YHSH | YHCHL |
| IHWHGI | YHSH | YHCHL |
| IHWHGI | YHSH | YHCHL |
| IHWHGI | YHSH | YHCHL |
| IHWHGI | YHSH | YHCHM |
| IHWHGI | YHSH | YHCHM |

100

142

570
