# Supplementary material for: Assessing the genetic diversity of Cu resistance in mine tailings through high-throughput recovery of full-length copA genes
Source: PubMed Central journal article supplement (PMC4541151; doi:10.1038/srep13258), 2015-08-19
Supplement: srep13258-s2.pdf [file srep13258-s2.pdf]

**Assessing the genetic diversity of Cu resistance in mine tailings through high-throughput recovery of full length *copA* genes**

Xiaofang Li<sup>1</sup>, Yong-Guan Zhu<sup>2</sup>, Babak Shaban<sup>3</sup>, Timothy J. C. Bruxner<sup>4</sup>, Philip L. Bond<sup>5</sup>, Longbin Huang<sup>1\*</sup>

<sup>1</sup>Centre for Mined Land Rehabilitation, Sustainable Minerals Institute, The University of Queensland, QLD 4072, Australia

<sup>2</sup>Institute of Urban Environment, Chinese Academy of Sciences, Xiamen, 10081, China

<sup>3</sup>Australian Genomics Research Facility, Parkville, Melbourne 3000, Australia

<sup>4</sup>Institute for Molecular Bioscience, The University of Queensland, QLD 4072, Australia

<sup>5</sup>Advanced Water Management Centre, The University of Queensland, QLD 4072, Australia

**\*Corresponding authors**

Longbin Huang: l.huang@uq.edu.au; also to Yong-Guan Zhu: ygzhu@iue.ac.cn

**Running title: Metagenomics for *copA* diversity in mine tailings**

Notes:

- 1-12 Alpha Proteobacteria
- 13-22 Delta Proteobacteria
- 23-47 Gamma Proteobacteria
- 48-54 Delta Proteobacteria
- 55-59 Epsilonproteobacteria
- 60-74 Firmicutes
- 75-91 Actinobacteria
- 92-97 Cyanobacteria
- 98-110 CFB group bacteria
- 111-113 Mycoplasmas
- 114-116 Chlamydias
- 117-119 Acidobacteriaceae
- 120-122 GNS bacteria

>gi\_294009986\_Sphingobium japonicum UT26S chromosome\_1

ATGACCCTTTCCGATGTCGATCGCCGAGCCTTTCCGAGCCTTTGCGGGTGGGGCGGGCGCTGGCCC  
TCAGCCGGATTTTTCCCGCCTGGGCGCAGAGCGGAACGGCGGGCCTGTCCCTGGCTCCCGGAGCGCTGAG  
CGGCGAGACCATCGCGCTGACCGTGGCGGAGGGGCATTTTTCGACCGGCGGGCGTTCCGGGCCACGCGGTG  
ATGATCAACGGCACGCTGCCTGCGCCGCTCATCCGCTTGAGGGAAGGGCAGAATGTCCGGCTGTCCGTCA  
CCAATCGCCTGCGGGAGGACACGTCGATCCACTGGCACGGCCTGATCGTGCCGTTCCAGATGGACGGGGT  
GCCGGGGATCAGCTTTCCCGCATCCGCCGGGCGAGACCTTACCTATGAATTTCCGGTCCGCCAGTCG  
GGCACCTACTGGTATCACAGCCATTCTGGAATGCAGGAGGCGATGGGCCATTATGGACCGATCGTGATCG  
ACCCCGCCGGGCCGGACCCCGTGCAGGCGGAGCGCGAGCATGTCGTATTCTGTCGGACTGGAGTCCGGT  
TCACCCGCATGTCCTGCTGCGGCGGCTGAAGCAGATGGGCGGCTATTTCAACATGCAGAAGCAGACCTTG  
TCGGGCCTGCTTGCGGGCAAGGACCAGAACGCGAAGGAGCGCCTTCAATGGGGCGCCATGCGCATGGACC  
CGACCGACATATCCGACGTCACCGGCTCGACCTACAGCTTCTGGCGAACGGCCATGGCACGGCGGAGAA  
CTGGACAGGACTCTTACGCCTGGCGAGCGGGTGC GGCTGCGCATCGTCAATGCGGCCGCCATGACCAAT  
TTCAACCTGCGCCTGCCGGGACTGCCGATGACGGTGGTGCAGTGCAGCGGCCAGCATGTCCAGCCGGTGG  
AGACCGACGAGATCCAGATCGGCATCGCGGAGACCTATGATGTGGTGGTGCGGCCACCGAAGCGAAGCC  
CTATGCCCTGATCGCGGAGGCGATAGACCGCTCCGGACTGGTGC GGCGACCCTGGCGCCCCGGATCGGC  
ATGGCGGCGGACGTGCCCGCGCTGCGCGAAAGGCCGCTGCTGGGCATGAAGGACATGGGCATGGACATGT  
CCGGCATGGGGGATATGCCCGGACATTCCATGAAGATGCGCGACCCGTCGTCGCGCCGAGGTGAAGAT  
GGGACCGGGCGTCGCCACCCTCTCCCCATGCCGGTGGACCGGACCGCCGACCGGCCACGGGGCTGGAG  
AGCGTCGAGCATCGGGTGTGACCTATGCCGACCTGAAATCGCTTGAGCCGAACAGCGACAGGCGCGCGC  
CGACCCGCACGCTGGACATCCACCTGACCGCGAACATGGAGCGCTACATGTGGTCCTTCGACGGGGTGAA  
GCTGTCCGACGGGGCCGAACCCATCGCCTTCCGCCATATGGAGCGGGTGC GGGTGAACCTGATCAACGAC  
ACGATGATGCCGCACCCGATCCATCTGCACGGCCATTTCTTCGAGCTTGTGACCGGCGCCGGCGACCATA  
ATCCGCTCAAGCATAACGGTGAACGTGCTGCCCGGAGGGAAAGTGAGCTTCGACCTACGGCAGACGCGCT  
GGGCGATTGGGCCTTTCACTGCCATATGCTGATGCACATGCATGCAGGGATGATGCGCGTCGTGACCGTT  
CGGCATGCGGCGGACGCGGCATGA

>gi\_258541105\_Acetobacter pasteurianus IFO 3283-01\_2

GTGCAGCATGATGCAGAATGGACAATACCCATGCATATTCCCCTGTTTTGAAAGGGAGAAATGTGTCTC  
GTCGGCAGTTTATAACTGGCGGCAGCGCATTGGCGGCCCTGTATGCCCTTAAGCCACCCAAACAGGTTTT  
TGCTTCTGCCACACATCCGGAATTGTGCCCAAACGCCAGCAACACCTTTGATCTGACCATCGGCTGG  
GCGAATGTAAATATTCTGGACAAACCACAGCGCGTGCCACCATGAATGGCGGTGTACCCGGCCCCATCC  
TGCGGTGGCGTGAAGGCGATAATTTACACCTGAACATCCATAATACATTGGACGAAACAACCTCCATCCA  
CTGGCATGGCATCCGCTGCCCGGCACATATGGATGGCGTGCCGGGGCTAAGCTTTGCCGGAATTGAACCC  
GGCGCACGCTTACCTATCGCTTTCCTGTAAAACAGAGCGGCACATACTGGTATCACAGCCACTCCAACA  
TGCAGGAAGCTATGGGGCTGTATGGGGCCATTGTGATTGACCCCAAGGAGCCAGACCCCAATAGTTATGA  
CCGGGATTACGTCATCCTGCTTTCAGATTGGTCTGATGTGGCACCCGCACACCATCATCAACAAACTGAAG  
TTTCAGGATGACTACTATAATTTCCGGCAACGCACGGCTGTTTCGTTCTTTCATGATGCCAAGAAATCCG  
GCGTGTGGCCGACACTAAAAGACCGCATGCAGTGGGCTGGCATGAACATGTCCGCCACGGATATTTCAGA  
CGTAAGCGGCATTATCTACACATATCTGATGAACGGCTGCGCCCCGGCTGCGAACTGGACCGGTATTTTT  
AAACCCGGTGAACGTATCAGGCTGCGGTTTATCAACGCTCCGCCATGACCTTTTACGATATCCGCATTC  
CCGGCCTCCAGATGGATATCATTAGGCGGATGGAATAATGTTGAACCCGTGCGGGTAGATGAATTCCG  
CATTGGTGTGGCTGAAACGTATGATTGCATTGTGCAGCCGAAAACGATCAGGCCTACACCATTTTTGCC  
CAAAGTGAGGACAGAACCGGCTACGCCCGCGGCACGCTCGCGCCTCATTCCGGCATGAGCGCACCTGTTC  
CCCCATGGATGAACGGCCGTACGCACCATGGTGGATATGGGCATGGCCATGCACGAAGGGCACGATAT  
GGGTGGCATGGATATGCACGACATGCCATGCACCAAGCCACAAAAACGCATGCGCCGCCTTTGAATGTA  
GAAAACCAGAACCGTGCCGCATGCCGATCAATCGTCTGGCTGACCCCGGTGACGGCTTACAAAACAACG  
GCCGACGGGTTCTGACATATGCAGACCTGCGCGCCACTACCCCGCCACAGATCAACGCCACCATCGCG  
CGAGATCACGTTGCACCTTACCGGCAACATGGAACGTTATATCTGGGGTTTGATGGCAAAAAGTTCTCG  
GAAGCCGAGCCTATCCCTCTGCGTTTGGGTGAACGGGTGCGCTTACCCTGATAAATGACACCATGATGG  
AACACCCCATCCATCTGCATGGTTTGTGGAGCGAACTGGAAAACGGGAACGGCCTGTACAACCCGATAAA  
ACACACCATTATTGTGCAACCGGGCGGAAAGCTGAGCTATCTGGTTTCTGCCGATACACCGGGTTTATGG  
GCTTTTCACTGCCACCTGCTTACCACATGGATTTAGGCATGTTCCGCACGGTGGTGGTGTGCATGA

>gi\_347756788\_Micavibrio aeruginosavorus ARL-13 chromosome\_3

ATGAAATTTTACGCCTATACTCTATTTTTGTGCCTGTTCTTTAGCTTTGCCAGCCCGCCAAGGCGGAGG

AATACAATCTTGTCATTGCCCATGAACCCGTGAATATCACCGGTAAGACCGTTGAAAAAATCACCATTAA  
CGGCACCATTCCCGGCCCGACCTTGCGGTTTACCGAAGGCGAGGATGCCATCATTATGTCACAAACAAG  
ATGGATGAGGATACGTCCGTCCATTGGCACGGCCTGATTTTGCCCGGTGAAATGGACGGTGTCCCGGCT  
TCAATGGTTTTCCGGGTATCAAGCCGGGCGAAACCTTCACCTATCGCTTCCCTGTTAATCAAACCGGCAC  
CTATTGGTATCACGCGCATAGTTCCGAACAGGAACAGGACGGACATTACGGCTCTCTCGTGCTTGTCCCG  
AAAGGCAAAGACCCGATCCGCGCCGACC GCGATTATGTTGTCCTTTTATCAGATTTCCATGATGAAGACG  
GAAAAGATATTTTCAGCAATTTGAAAATGTCGTCTGAGTATTACCAATATGCTCGCCGCACGATTGGAGA  
TTTCTTTGCGGACGCGGAAGAAAAGGATTTGGCAAAGCATGGGCCAACGCCAAAATGTGGGGCGAAATG  
CGGATGCTGCCGACCGACCTTTCTGATGTTTCCGGCTATACATTTCTCGTGAACGGCAGAACGCCTGAAC  
AAAACCTGGACGGCCCTGTTCAAACCCGGCGAACGGGTGCGCCTGCGTTTCATCAACGCTTCGGCCATGAG  
CATTTATGATGTGCGAATTCCTGGTCTGAAAATGAGTGTGGTTGAGGCGGACGGCCAAGGCGTAGAGCCG  
GTTACGGTTGATGAATTCGCTTTGGCGTTGCGGAAACCTATGACGTTATTGTGACGCCAAGGAAGACA  
AAGCCTTCACGATTGCAGCGGAATCTATCGACCGCACTGGCTTTGCACTTGGCACCTTGCACCGCGCGA  
AGGCATGAAAGGCCCGGCACCGCAGACGCGCCCGCGTGCTTTGCTGACTATGGCGGATATGGGTATGGGC  
CACGATATGGCGGGCATGGAAGGCATGGACCATTCCAAAATGAACCATGATATGCCGATGGGGCGATATGG  
CAGGGATGGATCATGGTAACATGGGACATGACATGGTCGGAATGTCTATGGAGGATATGCAAAGCGGCTG  
GGCGCAAGCGGGAACCCCGCCGGGCGACAAGGCTTTAAGCTATGCCGATCTTCGCTATGTCCGCATTGAG  
GCAGACACGCGCCAGCCGGAACGTGAAATTCTGTCCGTCTTGGCGGCAACATGGAGCGTTTCATATGGA  
CAATTAATGACAAGAAATTTGAAGATTCCGGGCCGATCAATCTGAAATACGGCGAGCGCGTTTCGCCTGAA  
ATTCGTCAATGATACGATGATGGCGCACCTATGCACTTGCACGGAATGTTTGTCAACTTGAAAACGGC  
CAGCCCGCCGAAAAATTACCGAACAAGCACACGGTCATTGTCGCACCGGGCAAACCTATTCGGTATTGC  
TGACCGCCGATCAACCCGGCGAATGGGCGTTCCATTGCCATCTCCTGTTTCATATGTCCGCAGGTATGAT  
GAACAAGGTGGTTGTAGCAAAGCTTGACCCTAATGCCGTGCCGCCGCCGAAAGCATCCACCACGAAGGCT  
GCGCCGCAAAAAGAAAAGCCGGAACAGGCTGATCCGCATGAAGGGCATTCCATGCCGATGAACCATCAAG  
GCATGGACATGAAAGGCATGGACGACATGCCGAGTATGGATCATTCCACGCCTCAAAAAAATGATACTTC  
GTCAAATCAAAAATCTTCTCACGGAGGCCACGATGCACACTAA

>gi\_162145846\_Gluconacetobacter diazotrophicus PAI 5 chromosome\_4

ATGATTTTTCCATCCTCGACGGGGCGGGGCGCGATGACGCGCCGCCGCTTCGTGGTGGGGGCCGGGTGT  
GGGGTGGCGGGCCGCGACCGGGCGCCGGTGC GCGGGCGTTTCGCGCCGCCTTCCGGCATCCCCGCCCCCG  
GCCCCGCACCCGTTTCGACCTTGC GATCGGTACAGTCCCGGTCAACGTACAGGGCGCGCGTCCGCGCG  
GTCGGCGTCAACGGATCGACCCCGCGCCGATCCTGCGCTGGCGACAGGGCGATAACGGTCGAACTGACCG  
TCACCAACCGGCTGCACGAACCCAGTTCGATCCACTGGCACGGTATTTCGGCTGCCGGCCGGCATGGACGG  
TGTCCCGGGCCTCAGCTTCGGTGGCATCGCGCCGGGGCGAAAGCTTCACCTACCGTTTCCCCGTACGGCAG  
AGCGGCACCTACTGGTACCACAGCCATTCCGGCTTCCAGGAGCAGACCGGCCTGTACGGCGCCATCGTCA  
TCGACCCGGGCAGCGGGCAGACCCGGCGGTGCGACCGCGATTATGTGCTGGTGTGTGCGACTGGACCGA  
CGTGGACCCGGCGGACATCGTCTCCAACCTGAAATTCCAGAGCGACTATTACAATTTCCGCCAGCGCACG  
GTCGGCACCTTCTTCCGCGACGCGCACCGCCAGGGGCTGGGCGCCGCGGTGCGGGACCGCCTGGCCTGGG  
GGGGCATGAACATGGCGCCGACCGACATCCTGGACGTGTCGGGCATCGTCTACACCTACCTGGTCAACGG  
GCAGTCCCCCGCGCCAACCTGGACCGGCCTGTTCCGCCCCGGCGAACGCATCCGTCTGCGCATCATCAAT  
GCCGCGTCGATGACCCTGTTTCGACGTGCGGATTCCCGGACTGGCGATGACCGTCGTGCAGGCCGACGGGA  
ACGACGTGGAACCGGTGACGGTGGACGAATTCGCATCGGGCCCCGCCGAAACCTACGACGTGATCGTGAC  
CCCCGCCGCCCGGGCCCTATACGATCTTCGCGCAGGCCGAGGATCGCACGGGCTACGCGCGCGGCACG  
CTGGCCACCGCCCCGGGCTCGCCGGCCCCGTGCCGCCATGGACCCCCGCCGCTGCGCACCATGGCGG  
ACATGGGCATGGGCGGCATGGCCCCGCCGCGAAAACCGGCAACGCGCCCCGCATGGACGGTATGGACAT  
GTCCGGAATGTCCGGAATGGACATGGACCCCAAGGAGATGGAACCCCCGGCCGCGCCACATCAGGCGCCG  
CCCGCGCCGAAGCTGAAGCCGGGGGTGAGGTGCAGAATGTCGCCGCCATGCCATGGACCGGCTGGCGG  
AACCGGGGGACGGGCTGGACCATAACGGCCGCCGCGTCCTGACCTATGCCGATCTGCGGGCGACCGTCCC  
CGGCATCGATCCCCGCCCGCCGTGCGCGGAGATCACCTGCACCTGACCGGCAACATGGAACGCTTCATC  
TGGGGCTTCGACGGCAGGAAGTTCTCGGAAGCCGCGCCGATCCGGCTCGCGCGGGGGGAGCGGGTCCGCT  
TCGTCCTGATCAACGACACGATGATGGAACACCCGATCCACCTGCACGGGTTGTGGAGCGAGCTGGAAAA  
CGGGCAGGGGGACCGCCGCCCTACAAGCACACGATTACCGTCAAGCCGGGCGAGCGGCTGAGCTATCTG  
GTCACGGCCGACGAACCCGGATTATGGGCCTATCACTGCCATCTGCTCTACCATATGGCAGTCGGCATGT  
TCCGCACGGTGGTGGTGTGCTGA

>gi\_56708791\_Ruegeria pomeroyi DSS-3 megaplasmid\_5

ATGCTCACATCTCAGCTTGGCGCGGCCCTTGCCGGCGCCACCCTCTTGCTGTCCGCGGCGACGGCGG  
CACAAAGCGGGAACCTATGACATAACAGTGGACAAGATCCGAATCGACGCAGGAACTTCCGCAAGAACGG  
GATCGGCTATAACAACAGCCAGACCCCGACGATCCTGCGCTTCAAGGAGGGTGAAAAGGTACGCTGAAC  
GTGACCAACAACCTGCGCGAGGATACCTCGATCCACTGGCACGGGCTGATCCTGCCCTTTGACCAGGACG  
GGGTGCCAAAGATCAGCTTTGACGGCATCAAGCCGGGCGAGACCTTTACCTATAACTTTCCGATCGTCCA  
GGCCGGAACCTATTGGTTTTACAGCCATTCGGGTTTCCAGGAACCGGACGGGGCCTATGGCGCCATCGTG  
ATCGAGCCCAAGGGCGGAGAGCGCATCCGCGCCAACCGGATTATGTGGTGCAACTGACCGACACCCACC  
CGCAGCGCGGCAAGCGGATCATGCGCAACCTGAAAATGTCGGCGGATTACTACAACCGCTCGCAGCGTAC  
ATTGCAGGACCTGATCAAGGATTCGGGCGATATCGGCCTCAAGGCGGCGCTGGAAGACCGCAAGATGTGG  
GGCCGGATGCGGATGATGCCACGGATGTGAGGACGTCCAGGGATTACCCCCATGATCAACGGAGAAA  
GCACCGAGCAGAACTGGACCGGCCTGTTCAAGCCGGGCGAAAAGGTGCGGCTGCGGCTGATCAACTCCTC  
GGCAATGGCCTATTTGACGTGCGGATCCCGGGCCTCAAGATGACCGTAGTTCAGGCCGACGGCAATGAT  
GTCAAGCCGGTCACGGTGGACGAACTGCGGATCTCGGTGGCCGAAACCTATGACGTGATCGTGCAGCCCA  
AGGAAAACCGCGTCTACAGCATCGTGGCTGAATCGATGGGCCGCACGGCCCTGGTGCAGCGGCACCCTGGC  
CCCGCGGAAGGCATGGCCGACCGGTGCCGCCGCTGCGGGAAAAACCGCGCCTGACCATGGCCGACATG  
AGCGGCATGATGGGCAGCATGGGCATGGAAGGCCATGTCATGCAAAGCGCCGCAAACCTCTCGACGACA  
TGAGCGGCATGGATCACAGCCAGATGAACATGCAGCCCAAACCGCAACCGATGGAGGGCATGGACCACAG  
CCAGATGGGCCACGCCGACCGGCCCCCAAGGCCGAGGCCGCGCCGATGGATCACTCTGCCATGACCGGC  
ACGGACCAACCGATGGCCGGTATGGATCACAGCCAGATGGGTGATGCCGCGCCGGCGCCTCAGGCCAAGG  
CCGCGCCGATGGACCACTCCACCATGACCGGCGCGGACAAGCCGATGGCCGGTATGGATCACTCCAGGAT  
GACCGGGTCCGGCAACTCGATGGCGGGCATGGATCATTCCGCGATGGCCAATGCCAAGGGCCAGGGCGAC  
CCGTTCTACGCCCCGGCAGCGGGCTGACCCGAAGGCGGCCAATGGCGGCAAGTTCCTCAGCTATGACG  
ACCTGACGGCGCGCAAACCGCTCTACAAGGATCGCCCCGCCACCCGCGAGATCGAGCTGCGCCTGACCGG  
CAACATGGAACGCTACATCTGGTCGATCAACGGCAAGAACTGTCCGAGGCAGAGCCGATCGTGCTGAAG  
TACGGCGAGCGGGTGCGGTTCAAATTCGTCAATGAAACCATGATGTCCACCCGATGCACCTGCATGGCA  
TGTGGTCGATCCTGGATACCGGCAAGGGCCAGTACGACCCGATCAAACACACGGTCAGCGTCGCGCCGGG  
CACCACCGTCTATACTGAGACCGAGGTCGATGTGACCGGCCAATGGGCCTTTCACTGCCACCTGTCCTAT

CACGCCGACGCGGGCATGTTCCGCAAGGTCGTGATCCAAGGCGGCCCCGCCTGA

>gi\_240136783\_Methylobacterium extorquens AM1\_6

ATGACGAACTTATTGTCCCGCCTTTCCGCTGCCTTCTCGGGGCCGCTCGCGGTCATGGTTCTTGTGC  
CGGTTTCCGCCCGTGCCGGCACCTACGACCTCGTGCTCGAGCGCCGACGGTGAACGTACGGGACGCGA  
GCGCGTCGGCATGCTCATCAATGGCCAGCTTCCCGGGCCTACGCTGCGGTTCAAGGAAGGCGAGGACGTG  
GTGATCAACGTACCAACCGCCTCGAAGAGAATGCCTCGATCCACTGGCACGGCCTGATCGTGCCGCCCCG  
AGATGGACGGCGTTCCCGGCATCTCGCCGGGATTCGGCAACGGCATCAAGCCGGGGCGAGACGTTACCTA  
CCGTTATAAAATCCGGCAGGGCGGGAACGTATTGGTACCATAGCCACTCCTCCGGCGAGCAGGAGCAGCTC  
GGGATTTACGGGCCCTGATCATCGAGCCCCGCGAGCGGAGCCGTTCAAGCATGACCGCGATTACGTGA  
TCATGCTCTCGGACTGGACCGACGAGGACCCGAAGCGGATCATCAAGAACCTGAAAAGCGAAAGCGGCTG  
GTACAACCGCAACCAGCGCACCTCGTGAGCCTGATCCAGGAGCTCGGCAAGGCTCCGAACGCCGAGGCA  
CGGGAGGCCGTCATCAGGAGCCACGTCGCTGGAGGGTATGCGCATGGACCCGACCGACATCGCGGATG  
TCGGGGGTCTCCACTACCTGGTGAACGGCCTTACGCCGAGCGCAACTTCACCGCCCTCTTCAAGCCCCG  
CGAGCGGGTCCGGCTGCGTTTATCAACGCTTCCGCGATGACCTATTTGACGTGCGCATCCCGGGGCTA  
AAGATGACGGTCGTTAGGCGGACGGCAACAACGTCCAGCCGGTGCCGATCGACGAGTTCCGTTTCGGGA  
ACGCCGAGACCTACGACGTGATCGTGACGCCGACCGAGGACCGCGCCTACACCATCGTGGCCGAGCCCCT  
GGACCGCACCGGGTTCGCCCCGCGGACCTTGGCGACACGACCTGGGATGGTGGGCGAACTGCCGCCCAT  
CGCGTCCGCCCGCTCACGCAGATGTCCGAAATGCTGATGAACCCCGGCCCAAAGGCGGGCAGCCGGGCA  
CGCCCCAGCCCGAGCAGGATATGCCCGGCCATGTGCAGCCCGGAGCCCCCTCGCGATGGCGATTGGCGG  
GATGGGCGACATGAACATGGGCGGCATGGGCGGTATGGGCGGCCAGCAAGGCGGGCACGGCGGTATGGCC  
GGCATGCAGGGCGGATCAATGCCTCAGGGCGGCATGTCCGGCATGGGCCAGGGCCGTGCGGGGCAGGGCG  
GCGGCAGGAGCGCCACGGCGAGGAAGCCGGCCGTTCTGCTGCGATGCCGGGAATGGACCACGGCGCCAT  
GCCGGGGATGAGCCAGGGGCGCCAGGCCCGAACGACGGCCGGGGCGCAGATGCAGGGCATGGATCACGGC  
GGCATGCCGGGGATGAGCCAGGGGCGCCAGGCCCGAACGACGGCCGGGGCGCAGATGCAGGGCATGGATC  
ACGGCGGCATGCCGGGCATGGGCTCGAGCGCCTCGCCCCGCGGCCAGAACCAAGGGATGTTTCGCGGCCCT  
GAACGGGGGACTGCAGCAAGGCCCCAGGCCAAGGTGCTCCACGGAGGCGAGGACATGCCGAACGAGGGT  
CCGACGCTTGAGAACGCCATGCCCGATCCCCTCGTGAACCGGACGGGCGCGCCGCCCGGCCACCAAGGTGC



TGTCGTACCGGGATCTCAAGGCGCTGAAGCCTTATCCGTACAAGCGCTACGACCGCATCATCGAGATGCG  
TCTGACCGGCAACATGCAGCGCTACATCTGGTCGATCAACGGCCGCAAGTTCAGCGAGGCGCAGCCGATC  
GTGCTGCGCTACGGCGAGCGAGCCCGCTTCCGGTTCATCAACGAGACCATGATGCCCCATCCGATGCACA  
TCCACGGCACCTGGTTCCTGCCGGAGGTGGGCAACGGCGCGCAACCCGCTCAAGCACACCGTCAACAT  
CAACCCCGGCGCGACGCTCGACGTCGATGTGCCGGCGGATGCGGAAGGACCGTGGGCGTTCCTACTGCCAC  
CAACTTTACCACATGGAGACCGGGATGATGCGCAAGATCATCGTGGTCCGAGAGACCGCCCGGCGGTGA  
>gi\_27375111\_Bradyrhizobium japonicum USDA 110 chromosome\_7

ATGTATTCCCGCGAGGATTCTTGGGCACTGCCGCGCTTGCCAGCGCGTCGGCCATCAGCGGCCGCGTCC  
AGGCTGCGTCGATTCCGGAAGCGCCACTATGGACAAGGTGGTGATGCAGCCGCCGCTGCATCCGATCAG  
CGGCCCGGACTATCGCCCCGTGGTCACGCTGAACGGCTGGTCGCTGCCGTTCCGCATGAACGGTGACTGG  
AAGGAATTCCACCTCGTCGCCGAACCCGTGGTGC GCGAGTTCGCCGAAGGCATGAAGGTGAACCTGTGGG  
GCTATAACGGCCAGTCGCCGGGCCCGACCATCGAGGCCGTCGAGGGCGACAAGGTCCGCATCTTCGTAC  
CAACAAATTGCCGAATACACCACCGTTCACTGGCACGGCATGATCGTGCCGAGCGGCATGGACGGCGTC  
GGCGGGCTGAATCAGCCGCACATCGATCCGGGCAAGACCTTCGTCTACGAGTTCGAGATGAAGAAGAGCG  
GGACCTTCATGTACCACCCGCATTCCGACGAGATGGTGCAGATGGCTATGGGCATGATGGGCATGGTCGT  
CGTGATCCCGCGGACCCGAATTTCCGGCCCCGTCGACCGCGACTATGTCTTCGTGATGAGCACCTATCGC  
GTCGATCCCGGCAGCTACCTGCCGCGGGTCAACGAGATGACCGACTTCAACATGTGGACCTGGAATTCGC  
GGGTGTTTCCGGGGATCGATCCGCTGCCGGTGC GGCTCGGGCACAAGGTGCGCGTGCGCATCGGCAATCT  
CAGCATGACCAACCATCCGATCCATCTGCACGGCCACAGCTTCGCGGTGACCTGCACCGACGGCGGCTGG  
ATTCCGGAGAGCGCGCAGATTCCCGAGACGACCACCGACGTCCCCGTCGGCGCTGTGCGGGTGTTCGACG  
TGCTCGCCGACAATCCCGGCGACTGGGCGTTCCTACTGCCACAAGTCGCATCACACCATGAACGCAATGGG  
ACACGAGGTGCGCACCTCATTGGCGTGTGCGCAAGGATCTTGCCAAGGCCGTCGGCAAGCTCGCACCA  
GACAGCATGGCGATGGGCTCGACCGGCATGGCGATGGGCAACATGGAGATGCCCGCGCCCCGACAACACGC  
TGCCGATGATGACCGGCACCGGCCAGTTCGGCCCCGATCGAGATGGGCGGCATGTTACGGTGATGAAGAT  
CCGCGAGGACCTCGCGCGCGACGATTACCGCGATCCCGGCCCGTACAAATTCCCGCAAGGCACCGTCGCC  
TACGAAGTGACGCCCGCGCCGCGGAACCGGCGCGGCAGCAAGGCGGCACGCCCGCGATGAAGAACATGA  
AGATGTGA

>gi\_222102329\_Agrobacterium vitis S4 plasmid\_8

ATGTTTAAACAGAAGACAAATGCTCGGTGCAGGCGCGGCTCGTTTCGACTGCGGCCTGGGCAAAAACGT  
CAAACATGGGCCTGCCGGAAGCCGCGCTCATGGAAAATGCCGAAACACAGACGCCAGTCAGACCATCGTC  
AGGACCCAACTATACCCCGTCTGACGCTGAATGGCTGGACTGCCTCACCGCATGAACAACGGCGTC  
AAGGAGTTCCACCTGGTCGCCGAACCGGTGGAGCGTGAAATGGCCGAGGGGATGACAGCGCATCTCTGGG  
GCTACAACGGCCAGTCTCCAGGGCCGACGATCGAAGCTGTGGAAGGCGATCGGGTCCGCATCTTCGTAC  
CAACAAGTTGCCGGAACATAACAACCGTCCATTGGCATGGCATGATCCTGCCGTCTGGCATGGACGGCGTC  
GGCGGTCTGTGCAACCCACATCCCCGTGCGCAAGACCTTCGTCTACGAGTTCGACCTCGTAAAATCCG  
GCACTTTCATGTACCACCCGATTCCGGACGAAATGGTCCAGATGGCGATGGGCATGATGGGATTTTTCGT  
CATTACCCCAAGGACGAGACGTTTCATGCCGGTGGACCGTGACTTCGTGTTCTGCTCAGCGCCTACGAC  
ATCGATCCCGAACTTACGTTCCGCGCATCATGGAAATGACGGACTTCAACCTCTGGGCCTGGAATAGCC  
GCATCTTCCCCGGCATCAGTCCGCTCGTCGTCTCAAGGACGACCGCGTGC GCGTCCGTGTGGCAATCT  
GACCATGACCAATCACCCGATCCACATGCACGGTTACGATTTTGAGGTTACCTGCACGGATGGCGGTTGG  
GTCAGGCCCGAGGCCCGCTGGCCCGAGGTCAGCATCGACATAACCCGTCGGCGCGATGCGTGCCTACGAGT  
TTGACGCCAAATACCTCGGTGACTGGGCAATCCATTGCCACAAGTCGCACCACACGATGAATGCCATGGG  
ACATGACGTTCCGACCTTCATCGGCGTCGATAAGAAAACGGTCACGGAGAAAATCAGGAAAATCCGCCCG  
GAATACATGCCCATGGGTACAGCTGGGATGGCCGATATGGGCGAAATGGAGATGGAGATACCCGAGAACA  
CTGTCCCGATGATGACGGGATGGGGAAAGCACGGTCCCATCGAGATGGGCGGAATGTTCTCCGTCTGAA  
GGTCCGCGAGGGTATCGCTGCCGACGATTACCCGATCCCGGCTGGTACGAAAACCCGCCCGGTACGCAG  
GCTTGGGAATGGACTGGCGAACTGCCGATACGACCAAGGCCAAAGACGCAAAAACCCAGATCACGCCAA  
AACCAGTGAAACACGGCTGA

>gi\_398349897\_Sinorhizobium fredii USDA 257 chromosome\_9

ATGTCCCCTGGTCTATGCCTTCGCCGCCAGGCGGCGAGCACCGCCGGAGCGCTTCCCGGGTTCCTCGTC  
ATGGCATGGTTCGGACTGGGAACCTTCCCCGCTATGTTGATGATGGGTGGCGTTGGCCGGATACTCGGGC  
CAGCCTCGCGGCGGCGGCGGCGTGC GGGTGGCCGGTGGCTTTATTCTCTTGCTCGGTCTCATCACGCTCGG  
CCGTGGTCTCCTGCCTTCTCACGCGCATATCGGCCTTGCTGGCTGAACGGACATCCCGCATGACTGCGC  
ATGACGACATACTCTGTAGCCACTGTTCACTGCCCGTCCGCGCTGCGCCCGATGGAGCGCAGGCTCAACGG

CGAGGCTTGC GCGTTCTGCTGCTACGGCTGCTGCATCGCCTTTCAGGTGAAGAGCGGCAGACACGAAGAG  
TGGGAAGCCGCCTGGCTTCTGATCCAGCTCGGCGTGGGAGGCTTCTCTCCATGAATATCATGATGTTCA  
GCCTCCTCCTCTATTCGGACGCGTTCACCGGGGTTCGATGCGGGCGTGCTGCCGTGGGTTCACTTTTTGCT  
CTGGATCTTCGCGACGCCGGCGGTTCGTGATTCTCGGCGGACCTTATCTGCGCGAAATGTGGCTCAATGGC  
ATTCAGGGACGAGTGACGTCGTCGGCACTCATCGTGCTTGGCGTCGCTGCCGCGTACCTCTATTCGGCAT  
TGGCCGTGTTTCGAGGGCAGCACGCATGTCTATTTTCGACACCGCCGTGATGGTGCTGATGCTATTCACCGT  
TGGCCGCTATCTCGAGGCTGTTGGCCGCGCAAGGGCGGCGCGGACCTCGAACCTTCTGGCCGAGAA  
AGCGAGAGCGCGACCGTGGTCCATGGCGCGGCAGAGATCCGCCGTCCGGTTCGCGGAGGTGTCGGCCGGCA  
TGCTGGTGC GGGTCCGGCCAGGCGAGCGCATTCCGGTTCGACGGTGTGGTTGTCGAGGGGGAATCGAACAC  
CGATGAAGCCGTGATTACCGGAGAAAGCCGGCAAGTGACAAAGGGCGCCGGCTCCAAGGTGATTGCCGGT  
AGCATCAATATCGACGGCCCGCTCCTGATACAAAGCAGCGGTGACGGAACCGCAACCCGCTGGGCGCGGA  
TTTGCCGGTCCGGTGC GCGAAGCGCTGGGCCGTTCGAGTTCAACCCAGCGCGTTGCAGACCGCGCCGTGGG  
CGTGTCGGTGCCGCTGGTCTCGCCCTCGGCGGTCTAACGATCGTTTACTGGGCGCAGTCATTGCCGTTT  
GATAGGGCGTTGCTGATTGGCCTCTCGGTACTGGTGGTTGCCTGTCCTTGTGCCGTCCGCTCGCTGCTC  
CGATGGCGACTTCTCTCGGCATCGGCCGGCTCGCGCGGCACGGCTGCCTCGTCCGCGACCCCGGCGTGCT  
CGAGACTCTCGCGCGTGTACGGTTACTCGCCTTCGACAAGACCGGCACTCTGACTGCGGGCAAAGCGCGT  
CTCGTCCGCGTCCGACCGGAGGAGTCCGGCATCGACGAAGTACTGGCGCGGGCCCGGCTCTGGAGCGGC  
TTTCCGAGCATGGTCTGGCGCGGGCTATCGCCGAGGCGCCGCTCAGCGGGACATCACGCCGCTCGTCAC  
CCGCGATGTTTCGGACGATTCCCGGCCGTGGCATCCGCGGCAGCGCCGAAGGCCGGCCCGTGGCGGTAGGG  
AACGGCAGGTTGATGAATGATCTGGGCTGGCCGCTTCCCCGTTCCCTGACCGAGCGTGCGGAACGCTGG  
AGGCGAGCGGTCATTCCGGTGGTCTATGTCGTTGGGGCGAGCGGGTTCAAGCCGTGCTGTGCTCGATGA  
CTCACCGCTTCCAGAGGCGCAGGGCGGATCGCGGCCCTGCGTGAGCGCGGGCTCGACGCCACACTGTTG  
ACCGGCGACTTGGCGCAAGCGGCGGAGCGGATCGCGGCCCTGGTTGGGATCAAGGACGTCAAAGCGGGCC  
TTTCGCCGGAGGCCAAACGGCTGGCCCTGGATCGGCTCCGCCATGACCACGGTTCGGTGGCGATGGTCCGG  
CGATGGACTGAATGACGGCCCCGTATTGGCCGCCGAGATGTCGGTATCGCCGTCCGGCTCCGCCACCGAT  
CTCGCCCGGAGACTGCGGGCGCTCGTGCTGCCTGCGGATGGATTGTGGATGCTGCCCTGGATCGTCGACG  
TGGCCCGCGCGGTCCGCAGGACCATCTTGACCAACCTTATGTGGGCGTTCCGGCTACAACCTTGTGCGGCT

GACGTTGCAACATTCGGACTTCTGCAGCCAATCCTTGCGGCGGCGGTTCATGGCCGGCTCGAGCATCCTC  
GTGGTGGTGAATTCGCTGCGGCTAGAGCGGCTGCCCCGATCCTGTTCCAGCGCTGGTCCCGGAGCAACGAT  
CCGGCGCCAAGGCGGAGCGTATACACAATGGCACCGGCATTTCCGCAATGGCCGGTCCGGCCGTCGAGCG  
GAGTTGA

>gi\_383768277\_Bradyrhizobium sp. S23321\_10

ATGGACAAGGTGGTGCAGCCGCCGCTGCACCCGATCAGCGGGCCCGACTATCGCCCGGTGTCACGC  
TGAACGGCTGGTCGCTGCCATTCCGCATGAACGGCGACTGGAAGGAATTCCATCTCGTCGCCGAACCGGT  
GGTGCCTGAGTTCGCCGAGGGCATGAAGGTCAATCTGTGGGGCTATAACGGCCAGTCGCCCGGCCGACC  
ATCGAGGCGGTAGAGGGCGACAAGGTCCGCATTTTCGTACCAACAAGCTGCCGAATATACCACCGTGC  
ACTGGCACGGCATGATCATTCCGAGCGGCATGGACGGCGTGGCGGACTGACCCAGCCGCACATCCAGCC  
CGGCAGGACCTTCGTCTACGAGTTCGAGATGAAGAAGAGCGGGACCTTCATGTACCACCCGCATTCCGAC  
GAGATGGTGCAGATGGCGATGGGCATGATGGGCATGGTCTGGTGCACCCGCGCGACCTGAATTTCCGCG  
CAGCCGATCGCGACTTCGTCTTCGTGATGAGCACCTACCGCGTCGATCCCGGCACCTATTTGCCGAAGGT  
CAACGAGATGACCGATTTCAACATGTGGACCTGGAATGCGCGGGTGTTCGCCGCATCGATCCGTTGCCG  
GTGCGGCTCGGCGACAAGGTGCGCGTGCATCGGCAATCTCAGCATGACCAACCATCCGATCCATCTGC  
ACGGCCACAGCTTTGCAGTGACCTGCACCGATGGCGGCTGGATTCCGGAGAGCGCGCAATATCCGGAGAC  
GACGACGGACGTGCCGGTCGGCGCGGTGCGTGTTCGACGTGCTCGCCGACAATCCCGGCGACTGGGCG  
TTCCACTGCCACAAGTCGCACCACACCATGAATGCGATGGGTCACGACATGCGCAATCTGATCGGGGTGT  
CGCGCAAAGATCTCGCCAAGGCCGTCGGCAAGCTTGCCCCGATGGCATGGCGATGGGCTCGACCGGCAT  
GGCAATGGGCAACATGGAGATGCCCGCGCCGACAACACGCTGCCGATGATGAGCGGCACCGGGCAGTTC  
GGCCCGATCGAGATGGGCGGCATGTTACGGTGTGAAGATCCGCGAAGGCCTCGCGCGGACGATTATC  
GCGATCCCGGCCCTATCAATTTCCGCAAGGCACCGTCGCTACGAAGTCGAGGCGCCCGATGCGGCGCC  
ATTACGGGAGCAGGGCAGGCCCTCGCACAAAATGAAGATGTGA

>gi\_549704410\_Rhizobium sp. IRBG74 circular chromosome\_11

ATGTCACAAATGGAGATCCGGGCGAGCCATCAGATTGCGATCGATGGCATGACATGCGCCTCTGCGTGC  
GCCGCGTTGAAAAGGCGATCGCCAGGGTGGCCGGGTTCTCAAGGCTTCGGTCAATCTTGCACGGAACG  
CGCTGACATCTCTTTTCCGGATCACCTGACGTGCTGGCCGTGATCGCGGCGGTGCGGAATGCCGGCTAT

GGCGTCGAAGAAAAACCATAGAGCTTGATATTGAGGGTATGACATGCGCCTCCTGTGTGGGCCGTGTTG  
AAAAGGCCCTGAAGGCTGTTTCCGGTGTTCGGAAGCGAGCGTCAACCTGGCGACCGAGCGCGCCACCAT  
CCGCGTCGCCAGCAATGCCGCCTCTACCGCCACCTTGGGGGAGGCGATCAGACGGGCGGGTTACACGGCG  
AAGGAAATCGTCGCCGACAGGGCCGGCAAAGTGGAACAGGACCGACGCGCCGTGGAGTTGCGCAGCCTGA  
AAATCAACCTGGCCGTGGCCACTGCTTTGACCCTGCCAGTCTTCGTTCTGGAATGGGCTCGCATCTTGT  
CCCCGCGATCCACGACATCGTGATGGAAACGGTCGGCATGCGGGAAAGCTGGTATCTGCAATTCGTTCTG  
ACGACGCTGGTACTCTTTGGACCGGGTCTGCGTTTCTTCAAAAAGGCATACCCGCACTTCTGCGGCTCG  
CGCCGGATATGAATTCGCTTGTCTGTTGGGCACCGCCGCCCTGGGGATTTTCGGTTGTGGCAACCTT  
CCTGCCGAAATATTGCCGCGCGGCACGGCGAATGTCTATTACGAGGCCGCTGCTGTCATCGTCACGCTC  
ATCCTCCTTGGCCGGTTCCTTGAAGCGCGCGCCAAAGGCCGCACCAGCGAGGCGATAAAACGATTGCTCG  
GGTTGCAGGCCAAGTCGGCGGGGTGTACGCGACGGCGAAACCGTGGATGTGCCGTTGCAGGATGTGCG  
CGCCGGTGTGTGATCATTGTCCGTCTGGCGAGAAAGTGCCGGTCGATGGCGTGATCCTCAGTGGCTCG  
TCCTATGTCGATGAATCAATGATAACCGCGAACCCTTCCGGTTACGAAAACGGCGGGTCCGAGGTGCG  
TGGGCGGTACGGTGAACCGCAACGGCTCTTTCACCTTCCGCGCCACCAAGGTGGGCGCCGATACGCTGAT  
CGCCCAGATCATCCGCATGGTCGAGGAAGCACAGGCCGACAAGCTGCCATTACAGGCGCTGGTCGACAAG  
GTCACCAACTGGTTCGTGCCGGCGGTGATGCTGGCCGACGCCACCTTCTCGTGTGGTTCTTCTTCG  
GACCGGATCCGGCTCTGACCTTCGCGCTCGTCAATGCGGTTGCGGTTCTCATCATCGCCTGTCCCTGTGC  
CATGGGCCTTGCCACGCCTACCTCGATCATGGTCGGCACTGGCCGCGCCGCCGAGATGGGCGTGCTGTT  
CGACGCGGTGATGCGCTCCAGACGCTCCGCGATGCCGAGGTGATCGCCGTCGACAAGACCGGCACGTTGA  
CGCTCGGCAGGCCGAAACTGGTGCATTTTACAACGACCGAGGGCTTCGGTGCCGATGAGGTGCTGCGCCT  
TGTGGCATCCCTCGAAAGCCGATCCGAACACCCGATTGCGGAGGCGATCGTCGAAGCCGCGAAACATGGC  
GGCCTGGCGCTTGCCGATGCGGAAGGTTTCGAGGCAACGCCGGTTTTGGCGTGGGGGCGGTGGTTGAAG  
GGCGCAGGGTTGAAGCGGGCGCTGACCGTTTCATGGCGAAGCTCGGTTACGATACCGCGATGTTTGC  
TGAAGCAGACCGGCTGGGCAGGGAAGGGCAGTCGCCGCTTATGCTGCAGTCGACGGCAGGCTGGCCGCG  
ATTATCGCAGTGGCCGATCCGGTGAAGCAGACGACCCCGAGGCGATCGCGGCGCTGCATGCGCTCGGCC  
TCAAGGTAACGATGATCACGGGTGACAATCGCCGCACCGCAGAGGCCATCGCCGTCGCCTCGGCATTGA  
CGAGGTGGTGGCGGAAGTGCTGCCGACGGCAAGGTGCAAGCCGTCAAAGGCTTGCCGCCGGTGGGCGC

CGGGTCGCCTTCGTAGGCGATGGCATCAACGATGCACCGGCGCTTGCGGCAGCCGATGTCGGCCTCGCCA  
TCGGAACGGGCACGGATGTCGCGATTGAGAGCGCCGATGTGGTGCTGATGTCGGGCGATCTGCGCGGTGT  
GGCCAATGCCATCGCCCTGTCCAAGGCCACGATCCGCAATATCGGCCAGAACCTGTTCTGGGCCTTCGCT  
TACAACGCCGCGCTCGTCCCCTGGCGGCCGGAATATTGTATCCTGTCAACGGCGTGTGCTGTCACCCG  
TCCTTGCTGCCGGCGCAATGGCACTTCCAGCGTCTTGTCTGACGAACGCGCTGCGCCTGAAAAGTTT  
CCGTGCGCCGCTCACGGACAGACCCGCGGGCTTGCAGCTCGCAGCAGCGGAATAG

>gi\_8719802\_Novosphingobium aromaticivorans DSM 12444 chromosome\_12

ATGGACAAGAACCTCCTGCTCGACCGCCGCCCTGCTTGTGCGCTCCGGCGCCCTGGCCCTCGCGCCGC  
TGTTTCCGGCCTGGGCGCAATCCGGGAATCTGGCCGGCCATGGCGGCCATTCCCGTGGCTCCGGCCCGAT  
GGCCGGGCGCAACAGCGGGGGGACGCTCTCGGGCGACACCATCGCGCTGAACATCGGCGAGGCGCGCTAT  
TCGGTGGGGCGGCGCTCTGCCTCGGCGGTTGCGGTAAACGGCACGATCCCCGCCCCCTCATCCGCCTGC  
GCGAAGGCCAGACGGTTCGCATCGCGTTACCAACCATCTGAAGGAACAGTCTTCCATCCACTGGCACGG  
GCTGCTCGTGCCCTTCCAGATGGACGGCGTGCCCGCCTGTCGTTCCCGGCATCGACCCGGGCGAGACC  
TTTACCTACCAGTTTCCGATCCTCCACTCCGGCACGTTCTGGTACCACTCCCACTCCGGAATGCAGGAAG  
CGGTCGGCCTTTACGGCCCGATCGTGATCGACCCCGCCCTGCCCGATGCCGCCGCACCGTTTCGACCGCGA  
ATACGTGCTGATGCTGGCCGACTGGAGCCCCGTCGATCCGCATGCCAGCTCAGGAAGCTGAAGACCATG  
GGCGGCTACTACAACTGGCAGCGCCAGACCGTGGGCGGCCTGATTGCCGGCAAGGACCAGAGCCTGAAGG  
ACCGGCTCGAATGGGCGAAGATGCGCATGGACGCGACCGACATCTCGGACGTGACCGGCGCCACCTACAG  
CTTCTCGTCAACGGCCACGACACCGAAGCCAACCTGGACCGCCCTGTTCCGTCCCGGCGAGCGGGTGAAG  
CTGCGGATCATCAATGCCTCGGCCATGACCAACTTCAACTTCCGCATCCCCGGCCTGCCGATGACGGTGG  
TTGCCGCCGACGGCTGCAACGTGCGCGCGGTGAGACCGACGAGATCCAGATCGCCATCGCCGAAACCTA  
TGACGTGATCGTCCAGCCCGGCGAGGCGGCACCGTTCCGCATCATTGCCGAAGCCATCGACCGGTCCGGC  
CTGGTCCGCGGACGCTGGCCCCGAGGCCGGCATGGTCGGCCCCGGTGCCGAAGCTGCGCCAGCGCCCCGA  
TCCTGACCATGCGCGACATGGGCATGGACATGTGCGGCATGGACATGGGCGCGGGCGGCGAGATCGACCT  
GTGGAAGCCCGCAAACGAGAGCATGGACGGCCATTTCGATGTCGATGCGCGACTTCTCTGCCGCGCCAGGC  
GTAAAGAAAGGCCCGGGCGTGGCGACGATATCGCCGATGCCGGCCGACCGGCTTGCCGACCGGGGAACGG  
GCCTCGAGAACGAAGACCACCGCTCCTGACCTATGCCGACCTGCGCTCGCGCGATCCGAACCCCGATCC

GCGCAAACCGACCCGGCAGATCGACGTGAACCTGACCGGAACATGGAACGCTACATGTGGTCCATCGAC  
GGCGAGACCATTTCGACGGCGCCGCTCCGATCCCCTTCGCAAGGGCGAACGCGTGCGGGTGAACCTTA  
TCAACCACACGATGATGCCGCACCCGATCCATCTCCACGGCCACTTCTTCGAACTGGTGACCGGCGAGGC  
GGGCAACCGGCCGCGCAAGCACACCGTCAACGTGCTGCCCGGCGGAAGGCCAGCTTCGACCTTACGGCC  
GATGCCGAGGGAGACTGGGCGTTTCACTGCCACATGCTGCTGCACATGCATTGGGGATGATGCGCGTCCG  
TCACCGTCCGCGCCGACAAGGGAGACGCGGCATGA

>gi\_33591275\_Bordetella pertussis Tohama I chromosome\_13

ATGAGCAGAGCAGTTTGAATCAGCGCCGCGCTTCGTCCAGGGCCTGGCGGGCGGAGGCGTGCTGGCGG  
GCCTGGGGCTGTGGCGCCAGGCCGCTGGGCCAGCCCGGCGCGGCGCAGCCCGAAGTGTTCGGGCAC  
CGAGTTCAACCTGGAGATCGGCCGCACGCCGGCCAACTTACCGGCGCGGCGCGCATGGCCACGACGGTC  
AACGGCAGCATCCCGGCGCCATCCTGCGCTGGCGCGAGGGCGATACGGTGACGCTGCGCGTGACCAATC  
GGCTGGACGAAGACACGTCGATCCACTGGCATGGCATCCTGCTGCCGACCGGGATGGACGGCGTGCCCGG  
CCTGAGCTTTCGGGCATCCGCCGGGCGAGACCTTACCTACCGCTTCCAGGTACGGCAAAGCGGCACG  
TACTGGTATCACAGCCACTCGGGGTTCCAGGAACAGACGGGCCTGTACGGCGCCATCGTCATCGAGCCCA  
GGCGCGCCGATCCGGTGCGAGCCGAGCGCGACACGTGGTGCTGTTGTCCGACTGGACCGATGAAGACCC  
CATGAGCGTGTTCCGCAAGCTCAAGGTCATGCCCGATTACTACAACACTACATCCAGCCCACCGTCGACAAC  
CTGATCGACGATGCGCGCAAGCAGGGGCTGGGCAAGCACGTTGGGCGAGCGCCTGATGTGGCAGCAGATGC  
GCATGAACCAGACCGACCTGGCGGACGTCTCGGGCGCGACCTATACTATCTGGCCAACGGCAAGTCGCC  
GGCCGGCAACTGGACCGGGCTGTTCAAGCCGGGCGAGCGGGTGCGGCTGCGCTTCATCAACGGTTCGGCC  
ATGACGTAATTCGATGTGCGCATTCCCGGCCTGAAGATGACGGTCGTGGCGGGCGGACGGGCTGCCGGTGA  
GGCCGGTGGAGGTCGACGAGTTCCGCATCGCCGTGGCCGAGACCTACGACGTGATCGTCGAGCCGGCCGA  
GGATCGCGCCTATACGATCTTCTCGCAGGCGATGGACCGCTCGGGCTACGCGCGCGCCACGCTGGCGCCG  
CGCGAGGGCATGCAGGCCGAAGTGCCGGCGCTCGATCCGGTGCAGGTGCTCACGATGATGGACATGGGCA  
TGCGCACGACATGCCCGGCATGGACCACGGCGCGGGGGCAGCAGGGCGCGGCCATGGACCACGGCGC  
CATGGGCGGGATGGACCATGCCGCCATGGGGCATGGCTCGAGCGAGGCGAGCGGGGGCATGGTGAAGTC  
AGGCACCCCTATCCCGCCGAGCACGGCCCGCCAATTCCATGCTGCCCGATATCGTGACCACGCGGCTGG  
ACGATCCGGGCGTCCGGTCTGCGCGACAACGGACGCAAGGTCCTGACTTACGCCGACCTGCGCTCCATGGT

CGAACCCGAGGACAACCGCGCGCCGACCCGCGAGATCGAGTTGCACCTGACGGGCAATATGGATCGCTAC  
ATGTGGTCGTTCAATGGCCTGAAGTTTTCGCAGGCCAAGCCCATCGTGCTGAAGTACGGCGAGCGCGTGC  
GCTTCGTGCTGGTCAACGACACCATGATGACCTACCCCATCCACTTACATGGGTTATGGAGCGATCTCGA  
GTCGCCCCGACGGCAACTTCCAGGTGCGCAAGCACACGATCAGCCTGAATCCGGCCCCAGCGGATCAGCTAC  
CGCGTGAGCGCGGACGCCAGGGGGAAGTGGGCCTACCACTGCCATCTGCTGTATCACATGGAAGCGGGCA  
TGTTCCGCGCCGTCGTCGTGGAGTGA

>gi\_56130627\_Cupriavidus metallidurans CH34 plasmid pMOL30\_14

ATGCGACGTGATCGACTGTCTGGCATCTTGCTGCCAACCTGCCACGCCCGCTTTCGTACAAGGTTTGG  
CCGCCGGCGGGTAATGGCGGGGCTGAGTGCTTTGGGCGGAACTGCGTGGGCACAATCATCGGGACTCCC  
CGAAAGCGCTTCATCCGGCACCGCCCCGGTATTGACGGGGACGGAGTTTGACCTTGTCATCGCCGAATCG  
GTTGTCAACTTTACCGGTACGCCGCGGGTGGCGACAATCAATGGGATGCTTCCCGGTCCGACGTTGC  
GCTGGCGGCAAGGCGACACCGTGACGATCCGCGTCACGAACCGCTTGACGAGCACACGTCAATCCACTG  
GCACGGCATCATCCTGCCGTTCCAGATGGACGGCGTACCGGGAATCAGCTTTGCCGGTATCGCCCCGGC  
GAGACATTTACCTACCAGTTCAAGGTCGAACAAACCGGCAGCTACTGGTATCACTCGCATTCCGGCTTCC  
AGGAAATGACCGGTGTGTATGGCGGCATCGTGATTGATCCGGCCACCGGCGTGGACGGTGTGCGAGCCGA  
CAGGGACTACACCATCTGCTCTCGGACTGGACCGACGAGGACCCCATGCGAGTCTGTGCGAAACTGAAG  
GTTTCAGAGCGACTACTACAACATCAAGCCCACCGTCTTCGATTTTTTCCGCGACGTTTCAAACGACG  
GTGTGAAGAGCGCTTTCGAGAAGCGCAAGATGTGGAACGAGATGCGGATGAATCCGACCGACCTGGCGGA  
TCTTCCGGTGCCACACTGACCTATCTGACCAATGGCGTTACCCCCGCTGGCAATTGGACTGGCTTGTTCC  
AAGCCCGGTGAGAAGGTACGCCTGCGGTTCAATGGGTCCGGGAATACGTTCTATGACGTACGTATTC  
CCGGCCTGAAGCTCAAGGTCATTCAAGTCGACGGCCAGAACCTGGAACCCGTAAGCGTTGACGAGTTCCG  
CTTTGGTCCCGGCGAGACCTACGACGTGCTGGTGGAAACCGCGAGACGACGCCTATACGATCTTCTCCAA  
TCCATGGATCGCACTGGCTACGCCGCGGCACACTCGCGGTGCGCGCAGGACTCAACGCCAGGTGCCGG  
CCGTGGACAAGCCCGAGTGGCTCACCATGAGCGACATGATGGGTGGCATGGGTGGCATGGGTGGCATGGA  
CCACAGCAAGATGGACATGGGCGGCATGAACCAAGGCAGCATGGCTGGCATGAACCATGGGGCCATGACC  
ATGGACCATAGCCAGCACGCGATGGGCGGCATGGCCATGGATGCTTCGCTCAAGGTCCCCAGCACGAAGG  
CTCGGCACGCCAAGACCGAATATGGCGCGAACACGGACATGCGCGTGGACATGGCCAGAACGAATCTCGA



CGACCTGGCATCGGTCTGCGTAACAACGGCCGCCGCGTTCTGACGCTGGCCGATCAACATACCATTGGC  
GGCCCCCTCGACAAGCGCGGTCTGCTCGGGAAGTTGAACTGCACCTCACCGGCAACATGGAACGCTACT  
CCTGGTCAATCGATGGTGTGAGTACGGCAAATCCACACCGGTCCGTTTCAAGTACGGTGAACGACTGCG  
CGTGATTCTGCACAACGACACGATGATGACTCACCCGATGCACCTGCACGGCATGTGGAGTGAGCTCGAG  
TCGCTGACGGTTCGTTCCAGGCCCGGCGACATAACCATTCCGGTCCAACCTGCGCAGCGGATCAGCTTCC  
TGGTAACCGCCGACGCATTGGGCCGCTGGGCATGGCACTGCCACCTTATGTTGCACATGGATGCCGGGAT  
GTTCCGCGAAGTACTTGTGGCCTGA

>gi\_300693042\_Ralstonia solanacearum PSI07 megaplasmid mpPSI07\_15

ATGCGCATGAATCATGCATCCGGCCTGCTGCTGCCGAGCCTGCCCGGCGGCGGTTTCGTGCAAGGGCTGG  
CGGCCGGCGGGGTGATCGCCGGGCTGGGGCTGGGCGGCATCGCCCCGTCGTCGGCGGCGGCCGGCGCCAC  
CGCGCTCGGCACGGCCCCGTTCTGCGGGGGACCGAATTCGACCTCGTGATCGACGAGACCCCGGTCAAC  
TTCACCGGCAAGCCGGCCATGGCCACCACCATCAACGGCATGCTGCCCGGGCCCACGCTGCGCTGGCGCG  
AGGGCGACACGGTCACCCTGCGCGTCACCAACCGCCTGCGCGAACCACCTCGATCCACTGGCACGGCAT  
CCTCCTGCCGTTCCAGATGGACGGCGTGCCGGGCATCAGCTTCCACGGCATCGCCCCGGCGAAACCTTC  
ACCTACCGGTTCAAGTCCGGCAAAGCGGCAGCTATTGGTATCACTCGCACTCCGGCTTCCAGGAGATGA  
CCGGCGTGTACGGCGGCCTCATCATCGACCCCGCGGCGGCGACCCGATCCGCGCCGACCGCGACTACAC  
CGTGCTGCTCGCCGACTGGACCGACGAGGACCCGATGCGGATCCTCTCCAGGCTCAAGACCCAGAGCGAC  
TACTACAACCTACCACAGCCACGGTGGTGGATTTCTTCCGCGATGTCGCCAACGACGGCTGGCAGGCTG  
CGCTCGACAAGCGCCGCATGTGGAACCAGATGCGGATGAGCCCGACCGATCTGGCGGACCTGTCCGCGGC  
AACGCTGACCCACCTACCAACGGCGTCACGCCGGCGGGCAACTGGACCGGCCTGTTCTCCCCGGGGGAG  
ACCGTGCGGCTGCGCTTCATCAACGGCGCCGGCAACACGTTCTATGACGTCCGCATGCCGGGGCTCAAGC  
TCAAGGTGGTGCAGGTCGACGGGCAGGACATCGAACCGGTCACGGTCGACGAATTCCGCTTCGGTCCGGG  
CGAGACCTGCGACGTGCTGGTGGCGCCCAAGGACGACGCCTATACGATCTTCTGCCAGTCGATGGACCGC  
ACCGGCTACGCGCGCGGCACGCTGGCCGTGCGCCCCGGCATGCAGGCCGCGGTGCCGGCCCCGGACAAGC  
CCCAGTGGCTCACCATGACCGACATGATGGGAGACATGGGCGGCATGGCGGGCATGTCCGGCATGGACCA  
CGGTGGCATGACCATGATGGACGCGGGCGACATCACGCCGATGGCACCGATGGACACCGGCGGCATGACC  
ATGATGGACGGCACCGGCGGCACGGACGACCTGCGGGTGCCGGGCAAGAAGGTCCGCCACGCGCGCACCG

AATACGGCCCCGGCACCGACATGCGCGTCGACACGCCGCGCACCAACCTGGACGATCCCCGGCATCGGCCT  
GCGCGGCAACGGGCGGCGCCTCTGGTGCTGGCGGACCAGCACACCATCGGCGGCCGCTCGACCGGCGC  
GGGCCGCGGCGGAGGTGAGATGCACCTGACCGGCAACATGGAGCGCTACACCTGGTCGATCGACGGCG  
TGGAGTATGGCCGCTCGACGCCATCCAATTCCGCTATGGAGAACGGCTGCGCGTGATCCTGCACAACGA  
CACGATGATGACGCACCCCATGCACCTGCACGGCATGTGGAGCGAACTCGAGGCCCGGACGGGCGCTTC  
CTGGCGCGCCGGCACACCCTGCCGGTCCAGCCCGCGCAGCGCATCAGCTTCTGGTCACGGCGGATGCGC  
TGGGCCGCTGGGCATGGCATTGCCACCTGATGCTGCACATGGACGCGGGCATGTTCCGCGAGGCGGTGGT  
CTCGTGA

>gi\_340785197\_Collimonas fungivorans Ter331 chromosome\_16

ATGGTGTCACGCAGAAATTTTCATGAGCGGCGCAGGCGCCGTCGCCATCGGCGCCAGCCTGGTCAGCCGGG  
CCGGTGCGGCGATGCTGCCGAAGCCGTAACGATGACTGCCGCGGCCACGCAGCCACCGCTTTCTCCACC  
CAATGGGCGGCCCTACAATCCGGTGGTCACCCTGAACGGCTGGACCCTGCCCTGGCGCATGAAGAACGGC  
GTCAAGGAATTCCACCTGGTGGCGGAACCGGTGCTGCGCGAAATCGCGCCGGGCATGAAGGCCAACCTGT  
GGGGTTACAACGGCCAGTCGCCGGTCTACCATCGAGGTGGTCGAGGGCGATCGCGTGCGCATCTTCGT  
CACCAACAAACTGCCGGAACATAACCAGCGTGCACTGGCACGGCCAGCGGCTGCCGAACGGCATGGACGGC  
GTCACCGGCCTGACGCAGCCGGGCATCCAGCCGGGCAAGACCTTTGTCTATGAATTCGTCGAAAACGCC  
CCGGCACTTTTCATGTATCACCCGCATGCCGATGAAATGACGCAGATGGCGATGGGCATGATGGGCTTCTG  
GATCACTCATCCGAAAGACCCAGCCAGCACCGCGCCGACCGCGATTTCTGTTTTTGTCAACGCCTAT  
GACATCGATCCCGGCAGCTACACCCGAAAACCAGCACCATGCTCGATTTCAACCTGTGGACTTTCAACA  
GCCGCGCGTTCCCGGGCATAGACCCGATGGTGTGCAGCCAGGGCGACCGCGTGCGCATCCGCGTCGGCAA  
CCTGACCATGACCAACCACCCGATCCACCTGCACGGCCACGAATTTGTGGTCGCCGGCACCGACGGCGGC  
TGGACGCCCGCGCATCGCGCTGGCCGGAAGTACCACCGATATCGCCGTGGGCCAGATGCGCGCCATCG  
AATTCGACGCCACCGAACTCGGCGACTGGGCCTTCCATTGCCACAAATCGCACACACCATGAATGCGAT  
GGGCCATGAGGTGCCGACCATGATCGGCGTCGACCAGCGCGACGTCCTTGCAAAAATCAACCAGCTGGTG  
CCGGACTACATGGCGATGGGAGAAACCGGCGGCGCCATGGGCGAGATGGAGATGCCGCTGCCGGACAACA  
CCTTGCCGATGATGACCGGCAGCGGCCGTTCCGGCGGCATCGAGATGGGCGGCATGTTACCACGGTGAA  
AGTGCGCAAGGGCCTCGCCCGCAACGATTACAAGGACCCTGGCTGGTACAGGCATCCCGCCGGCACCGTT

GCCTATGAATGGAAAGGCAGCGACGCATCCATGCCGGCCGCCGCCCGCGCACCCGGACGCCGGCGGCATGG  
CCGCCAGGCCGGGCGAAAAGGTCCTGAAGGTGATCAAGCCTGGTTCGCAAGACAAGCACTAA

>gi\_410692016\_Thiomonas sp. 3As\_17

ATGCAACGCAACCTCCTCATCCGACCAGAAGGTGTCCATGTTCAACGGCGGCGCTTCGTGCAAGGGTTCG  
CTGCTGGCGGCGTCATGCTGGGGCTGGCCCCGTGGGCGGCGCGCGCAAACGGCGCCCACCGCAACCGG  
GACGGCCCCAGATCTGCGGGGTCGCGAATTCGATCTGGTGGTGGCCGAGACACCGGTCAATTTACCGGA  
AAACCTCGGGTCGCGACGACGATCAACGGATCGATTCCAGGGCCGACGCTGCGTTGGAAGGAAGGCGACA  
CGGTGACGATTCGTGTGACCAACCGTATGAGCCGCTCGACGTCGATCCACTGGCACGGCATGCTCGTGCC  
CTTTCAGATGGATGGCGTGCCTGGAATGAGCTTCAAGGGCATCGCGCCCGGCGAGACCTTCGTTTATCAC  
TTCAAGGTTTCAGCAGGCCGGCACCTACTGGTACCACTCGCACTCGGGCATGCAGGAGCAAACCGGCATGT  
ACGGCGCCATCATCATCGAGCCCGCGCATGGCAAGACCATAACGCGGAGACCGATCATGTGGTGCTGTT  
GTCCGACTGGATGGACGAAGACCCGATGCGCGTCCTGGCCAAGCTCAAGGACGACAGCGGTTTTGACAAC  
TACCATGAGCCGACGGCGGTGGACTTCTTTCGCGATGTCTCCCGGAGGGACTGCGTGCGGCACTCGACA  
AGCGCGCGATGTGGGAGCAGATGCGCATGAGTCCGAACGACCTCTCGGATCTTTCGGGCGCGACGCTCAC  
CTACCTGATGAACGGCGTCACCCCGGCGGGCAACTGGTCGGCGCCCATCGTGCCGGGCAAGCCCGCCAGG  
CTGCGCTTCATCAACGGCGCGGGCAACACGTTTTTACGACGTGCGCGTCCCTGGCCTGAAGCTCACCGTGG  
TGCGGCGCGATGGGCAGGATGTGGAACCGGTCAGCGTGGACGAGTTCCGCTTCGGTCCCGGGGAAACCTA  
CGACGTGCTGGTGCGCCCGAAAACCTCGGCCTACATCATCTTCGCACAATCGATGGACCGCACTGGTTAT  
GCGCGCGGCACGCTGGCTGCACGCCCGGGTCTCGCCGCGCCCGTTCCGCCGCTGGACCCCGCCAGCAAC  
TGACCATGGCCGACATGATGGGCAACGACATGAGCTCGATGCCAGGAATGGACATGGGGGGGATGAGCAT  
GGACACGGGCCCCGCCGTGCGACACGCACAGACCGAGTACGGTCCCGGCGTCGACGCCCGCGTCGATCAC  
CCACGGACCAATCTGGACGATCCCGGTGTGGCCTGCGCAACAACGGCAGACGCGTGCTGACTCTTGCTG  
ATCTGCACACGATCGGCGGCCCGATCGATCCGCGTGCGCCAGGTCGCACGATCGAGATGCATCTGACGGG  
CAACATGGAGCGCTACACCTGGTCGTTTCGACGGCGTGCCGTTCCGGGAGTCGACACCGGTGCATTTCCGC  
TATGGCGAGCGCCTGCGCATGGTGTGGTGAACGACACGATGATGACCCACCCGATGCACATGCACGGCA  
TGTGGAGCGAACTGGAGAGTCCGGATGGCCAATTCCAGGTGCGCCGCCACACCATCCCGGTCCAGCCGGC  
GCAGCAGGTCAGCTATCGCGTCAGCGCCGACGCGCTGGGGCGTTGGGCCTGGCACTGCCATCTGATGATG

CACATGGATGCGGGGATGTTCCGCGAGATTCTGGTGTCTGTA

>gi\_30248031\_Nitrosomonas europaea ATCC 19718 chromosome\_18

ATGACATGCGCTGCATGCGCTGCCCGGATCGAGAAAAATCTCAACAACTGCCGGGCGTGCATGCAGCTG  
TCAATTTTGCCAATGAGAAAGCCCTCATAAAGTTCGATCACGATTCCACCCACCCTGAAGAGCTGGTTCA  
ATCCATCGAAAAGGCAGGATTCCAGGTCCCGGAACAGACCGTACAGCTGCAAATCAGCGGCATGACTTGT  
GCCGCATGCGCAAATCGTATCGAAACTGTCCTGAATGAGATACCCGGAGTCAGAGCCATATTGAATCCGG  
CTGCAGAAATTGCTTATATCAGCTTCAATCCCGCCATTACTTCGGTTCGAGCAACTGGTTTCTGCTGTAGA  
AAAGGCAGGTTATGGCGCTAATCAGATCAGTGATGACAATTACGTTAAAGAACAATCCCGCAATCAAGCT  
GCCTACCGGAAAGAACTCCGTATATTCTGGATCTCTGCCGCCCTGACTGTACCCTTCATGCTGGAAATGA  
TCATGATGCTGACGGGTAATCACAACAACCTGCTCCCTTACTGGCTGCAATGGCTGCTTGAACGCTGAT  
CCAGTTTTGGCCCGCAGGCGTTTCTATATCAGCGCCTGGCGCACACTGCGTGGCGGAGGAGCCAATATG  
GATGTACTCATCGCACTGGGTACCAGCATGGCCTATCTCTTCAGCACCGCCGTCATCATTTTGCAACTGG  
ACCAGCATGTTTACTTTGAGGCCAGCGGATGATCATCACGCTCGTGCTTCTGGGCAAGCTGATGGAAAC  
CAGAGCAAAAAGAAAACTTCAGCAGCCATTGAAACTCATCAAATTCAGCCAAAACGGCCAGAGTC  
GAACGTGATGGGGAAATTATCGAGATCGATATCAATAGCCTTAAGAATGAGGATATTTTTCTTGCCGCT  
CGGGCGAAAGCCTGCCCGCGATGGCATCGTCATTGAAGGATCTTCAGCATAAACGAAGCCATGTTGAC  
AGGTGAAAGCCAGCCGGTTACCAAGCAGGTGGGCGCAAAGGTTTATGCCGCTACCCAGAATCAGCATGGT  
TACTCAAATGCCGTGTAACGGGTGTCGGTAAAAATACCCAGCTTGCAGCCATCATTCTGCTGGTTGAGA  
TTGCACAGGGCTCTAAAGCACCTATCCAGCGTATGGCAGATACTGTCTCTGGTATTTTTGTACCAATTGT  
AATTGGTATCAGCATTCTGACATTGGGACTAACCTGGTGGCTTACAGGCCATTTTCGTCATAGCACTCATC  
AATGCAGTAGCAGTACTGGTTATTGCTTGCCCTGCGCACTGGGTCTGGCCACTCCTACTGCAATCATGG  
TTGGCACAGGAAGAGGAGCACAAGAAGGAATTCTGGTAAAAACGCGACCGCACTGGAACCTGCAGAAAA  
AATCCAGATGCTTGTGTAGATAAAACAGGGACGCTGACCGAAGGCCATCCATCAGTCACAGATATTATC  
GTGGCCGATGAGGTGAATGAGCACGATTTATTACAGATTGCAGCTTCACTGGAACAAGGCTCTGAACACC  
CCCTGGCAAAGGCGGTATCGCAATATGCTTCTTCATCAAAAATCAGATTATTGGCGATAACCAATTTTGC  
CTCTGTGACCGGCAGCGGAATCAAAGCGGATATCGACAATGCATCTTACATTCTGGTTCACCCAAATTT  
TTGGCAGAAAAAGGTGCTGTGCTCGATCAGCAGCGTATCACTGCACTCCAGACAGAAGGTAAAACCGTCG

TGGGTGTCGCTATCCAAATTAATGAATCAGTCCGGTAATCGGCTATCTTGCCATTGCGGATTCCTACG  
CGAAACTTCCATCAAAGCAATTCAACGCATCCAGAATCTGGGCATAGATGTCATGATGCTGACAGGTGAC  
AACCCGACTACGGCTGCCGCCATCGCAAAACAGGCGGGAATAAAAAATTTTTCATGCAGAAGTTTCGCCTC  
AGAATAAAGCAGCCGAAATCGAAAAAATCAAGGCAAATGGCCAGTTTGTCTGGGATGGTAGGAGATGGAAT  
CAATGATGCACCTGCACTGGCAGCCGGAATGTGAGTTTTGCGATTGGTGCTGGATCAGATATAGCAATT  
GAAGCCGCTGACATTACATTGATGCGCAATGATCTGATGAGTGTGCGGATGCCATCTCACTATCGCGCA  
GCACACTGCACAAAATCCGGCAGAATCTGTTTTTGCATTCTTTTATAATATTTTAGGTATTCCACTGGC  
AGCAGCAGGTATGCTAAGCCCCGTAATTGCAGGTGCAGCAATGGCAATGAGTTCGGTATCAGTCATTACC  
AATTCATTACTGTTGAAACGCTGGCGTGCAGGCGTTTAA

>gi\_330822653\_Alicyclophilus denitrificans K601 chromosome\_19

ATGCGATTCAAACCCCTTCCTTTTCCGTCTCCCAGGCCAGGCAATCCAGCGCCGGCGCTTTCTGAGGG  
CGCTGGCGGGCGGTACCGCATTGGGCACGCTCGATGCCGCACTGCCCGCCTGGGCCCGGCAAGACCTGCC  
GGTAGCCCATACGGGAACACCGCCCGAGTTGCGTGGGCCCGTTTTCGACCTGACGTTGACCGAGACCCGC  
GTCGATTTGACGGCCGAACGGGCATGCCACCACCGTCAACGGCAGTCTGCCCGCCCCGACGCTGCGCA  
TGCGTGAAGGCGAGACGGTGACGATTCGCGTCACCAACCGCCTGCGCGAGACGGCTTCGATCCACTGGCA  
CGGCATCATCCTGCCATTCCAGATGGACGGCGTGCCGGGCGTCAGCTTTGCCGGCATCGCCCCGGGCGAG  
ACCTTCACCTACCGCTTACGCTGGAGCAAAGCGGCACCTACTGGTACCACTCGCACAGCGGCATGCAGG  
AGGTGACCGGCCTGTATGGCGCGCTCATCGTCGAGCCGCGCGGGGGCGAAGCCATACGCGCCGAGCGCGA  
ACATGTGGTGCTGCTGTCGGACTGGACCGGCAGCGACCCGATGCGCGCCCTGGCCAACTCAAGGCCAG  
GGCGACGTGTTCAATCAGCATCGTCCGACCTTCGTCAAATTCATGCAGGACGTGCGCGCCAAGGGCATGC  
ATGCGGCCATGGCGGAGCGCGACATGTGGAACGCCATGCGCATGAGCCCGAGTGACCTGGCCGACCTGTC  
ATCCACCGTGCTCAGCTACCTGGTCAACGGCCGACGCCGGGCGCCAACTGGACGGCCCTGTTCAATCCC  
GGCGAGCGCGTGCGCCTGCGCTGCATCAACGGCAGCGGCAATACGTTCTATGACGTGCGCATTCCGGGCC  
TCAAGCTCACCGTGGTGCAGGCCGACGGGCAAGACGTGGAGCCAGTGACGGTGGATGAGTTCCGCTTCGG  
CCCCGGCCAGACCTACGACGTGATCGTGCAGCCCAAGGACGATGCCTACACGCTCTTTGCGCAATCGATG  
GATCGCACCGGCTACGCGCGCGCCACACTGGCGGTACGCCCGGGCCTGAGCGCGCCGGTGCCCGCGCTGG  
ATGCGGTGCAGTGGCTACCATGGCCGACATGATGGGCGGCATGGCGCAAGGCGGTGGCCACGACATGGC

GGCGATGGGCCACGGCTCCATGGTCGGGATGAACCATGCTGGTATGGCCAGCATGCAGGGCATGGGCGGC  
ATGCCCCGCATGGCGTCCAATCCGTTGCAAAAGCCCCGGCACCACCGTGCGCCACGCTCGCACCGAGTGGG  
GCCCCGGCGCCGACATGCGCGTGGACATGCCGCGCACCAACCTGGATGACCCCGGCGTGGTCTGCGCGA  
CAACGGCCGGCGCGTGTCTACGCTGGCCGATCTCAAGACCGTCGGCGGATCGCTCTATGCCGGCGGGCCC  
GAGCGCGAAATCGAGTTGCATCTGACGGGCAACATGGAGCGCTACACCTGGTCGTTTCGACGGCCTGGACT  
TCACCGACAGCCGCCCCGTGCATTTCCGCTACGGCGAGCGCCTGCGCGTAATCCTGCAAAACGACACCAT  
GATGACCCACCCCATGCACCTGCACGGCATGTGGCAGGAGCTGGAAAACGCCTCGGGCGAATTCGTCGCG  
CGGCTGCACACCATCCCCGTGCAATCGGCGCAGCGCGTGAGCTTTCTCGTCAGTGCCGACGCACTCGGCC  
GCTGGGTCTGGCACTGCCACCTGATGTTCCACATGGAAATGGGCATGTTCCGCGAAGTGGTGGTGGCATG  
A

>gi\_74316018\_Thiobacillus denitrificans ATCC 25259 chromosome\_20

ATGAACCTCATTCTCGATTCTTGCCTGCAACGCCGAATCTCCCGCGCCGGCGGTTTCTCCAGGGACTGG  
CGGCCGGCGGCATCTTGCTCGGTGCGCCCTCCTTGATACTGCCGGCCTCGGCACGGGAAGCCGGCACGGC  
CGCAGGCAGTGCGCCGGTACTCAGCGGCACCGAATTTGATCTCACGATCGCGGAGACGGCGGTGAACTTC  
ACCGGTAAACCGCGTATGGCGACGACGATCAACGGCTCGATTCCCGGGCCTACGCTGCGCCTGCGCGAGG  
GCGACACCGTGACCATCCGCGTACACAACCGGCTGACCGAGGACACGTCGATCCACTGGCACGGCATCCT  
GCTGCCCTTCGAGATGGACGGCGTGCCGGGCATCAGCTTCAAAGGAATTCCGCCCGGCCAGACCTTTACC  
TACCGCTTCAAGGTGAAGCAAACCGGCACCTATTGGTACCACTCGCACTCCGGCATGCAGGAGCAGACCG  
GGATGTACGGCACGATCATCATCGACCCCGCGCGTGGTAACTCCGTCGGCGCCGATCGCGATTACGTCGT  
GCAATTGTCGGACTGGACCGACGAGCATCCGATGCGGGTGCTCCACAAGCTCAAGGTGCAGGGCGACTAC  
TTCAACTTCAATCAGCCGACCGCCGGGACTTCTTCCGCGACGTGTGGAAGGAAGGGCTCAAGGCCGCGA  
TCGACAAGCGCCGGATGTGGAACGAGATGCGCATGAGCCCGACCGATCTGGCCGACGTCTCCGCTCACAC  
CTATACCTATCTGATGAACGGCGCGGCGCCGGCCGGCAACTGGACCGGGTGTTCGCCCGGCGGGAAAG  
GTGCGATTGCGCTTCGTCAACAGTGCAGCGATGACCTTCTTCGACGTGCGCATTCCGGGACTCAAGATGA  
CCGTCGTGCAGACCGACGGCAGGATGTGGAACCGGTCACGGTCGACGAAATCCGCATCGGCGTCGCAGA  
GACCTACGACGTGATCGTGAGCCCCAAGGACGAGGCGTATACGATCTTCGCGCAGTCGATGGATCGGACC  
GGCTTCGCGCGCGGCACGCTCGCGACCCGTGCGGGACTTGTGCGGGCGGTTCCGTCACCGGACAAGCCCCG

TGGCGCTCGAAATGCAGGACATGATGGGCGACATGACCGCCTCGCGGGGCCACCATGCCCGGACCGA  
GTATGGCCCCAGTGTGACATGCGCGTCGACACCCCGCGCACCGACCTGGACGACCCCGGCGTCGGCTTG  
CGCGACAACGGCCGGCGGTGCTGACCTATGACCATCTCCACAGCGTCGGCGGGCCGCTGGACGCGCGGG  
GCCCCGGACGCGAGATCGAGCTCCATCTCACCGCAATATGGAGCGCTACGCCTGGTCCATTGACGGCGT  
TGAGTTCGAGAAGTCCACGCCGGTGCAATTCGTCACAACGAGCGGCTTCGCGTGGTCTTCGTCACGAT  
ACGATGATGACGCACCCGATGCACTTGACGGGATGTGGAGCGAACTCGAAAGTCCGGAAGGGAAGTTCC  
AGGTGCGCAAGCACACGATCGCAGTACAGCCCGCGCAGCGCGTGAGCTTTCTGGTCACCGCCGATGCCCT  
AGGGCGTTGGGCATGGCACTGCCATTTGGGGCTGCACATGGACATGGGCATGTTCCGCGAAGTCGTCTGTG  
GCCTGA

>gi\_543961847\_Sulfuricella denitrificans skB26\_21

ATGCTCGGCCTGATGTGCGTTGTCAAACAGTCTGGGCAAGCATCGCAGACCCAGTCTCAAGCCGCGTCC  
CGGTGCTCACCGGAACCGAGTTTGATCTTGTTATCAGCGAGTCCCGGTTAATTTCACTGGAAATCCGCG  
CATGGCCACCACTGTCAACGGCTCGATCCCGGCACCCACGTTGCGCTGGCGGGAAGGCGAAACAGTGACG  
ATCCGTGTGACCAATAAACTGCGCGAAACCACTTCCCTCCACTGGCACGGCATCATTCTACCGTACCAAA  
TGGATGGTGTGCCGGGCATCAGCTACAAGGGAATCGCCCCAGGGGAAACCTTACCTACCGCTTCAAGGT  
GGTGCAAAGCGGCACCTATTGGTACCACTCCCATAGCGGTTTTTCAGGAACAGACCGGCATGTATGGAGCC  
ATCGTCGTTGAACCGGCGGGAGGCGAGAAAATCCGTGCCGATCGCGACTATGTGGTGCAACTGTCCGATT  
GGACCGACGAAGACCCGATGCGGATTTTTGCCAAGCTCAAGATGCAGAGCGACTACTATAATTTCAACCA  
GCCTACCGTCTCGGATTTCTTTGCGGATGCCTCGCGCAGCGGGTTCAAGACTGCGTTCGAAAAACGCAAG  
ATGTGGAACGAGATGCGCATGAGCCCCGCCGATCTGGCGGATATTTCTGGTTACACCTACACCTTCTCA  
TGAACGGCAGCACCCCGGACGGCAACTGGACAGGGTTGTTCCAGCGTGGCGAGCGCGTGCSTTTGCGTTT  
TATAAGCAGCGGCACCCAGAGCTTCTTCGATGTGCGTATCCCGGGCCTGAAAATGAAAGTGGTTCAGGTT  
GACGGCCAGGATATCGACCCTGTAACGGTGGACGAATTCCGTTGCGGCCAGGGGAAACCTATGACGTGA  
TCGTCGAGCCCAATGACGACGCCTACACGATTTTTGCCAGTCCATGGATCGCACCGGTTTTGCCAGAGG  
GACGCTCGCTGTGCGCGAAGGGCTTACCGCGACCGTGCCCGAACTAGACAAAGCCGAATGGCTAACCATG  
ACGGACATGATGGGCGCCATGGGTGGCATGAACCACGGCGGCATGGCCATGGACCACAGTCGGCACGTCA  
TGCCGGGGATGGCGATGTCAGGTGGGTTGGCCATACCAAGTAGCCAGGTGCGCCACGCGAAAACCTGAATA

TGGTCCCAGCACCGACATGCGGGTCGACATGGCGCGCACCAATCTGGATGACCCCGGCATCGGACTGCGT  
GACAATGGGCGCCGAGTATTGACTGGCCGATCTTCACACGATTGACGGCCCGCTCGACATGCGCGGCC  
CCGAGCGCGAGATCGAGCTGCATCTGACCGGCAACATGGAGCGCTACACCTGGTCGCTAGACGGCCTCGA  
GTTTCGGAAAATCCACTCCCCTGCATTTCCGGCACGGCGAGCGGCTAAGAGTCATCTTGACAACGACACC  
ATGATGACCCACCCCATGCACCTGCACGGCATGTGGAGCGAGCTGGAAAGCCCGGAAGGCCACTTTCAGG  
CGCGGCGTCACACGATTCCCCTGCAGCCCGCGCAACGCATCAGTTTCCTCGTACTGCCGACGCGCCGGG  
ACGCTGGGCTTGGCACTGCCACCTGCTCTATCACATGGACGCCGGCATGTTCCGCGAAGTGGTGGTGGCT  
TGA

>gi\_311103224\_Achromobacter xylosoxidans A8 chromosome\_22

ATGAGTAGAGCAGTTTGAATCCGCGCCGCCGTTTGTGCAGGGCCTGGCCACGGGCGGCGCGCTGGCCC  
GCATGGGCCTGTGGAGTCCGTCGTCGTGGGCGCAGGCCGCCCGGCGCGGCAGAGCGTGTTCGGGCAC  
CGAGTTGACCTGGAGATCGGCGAGAGCCCCGCCAACTTACCGGCGCGCCCCGCATCGCGACCACGGTC  
AACGGCATGCTGCCCCGCGCCACGCTGCGCTGGCGCGAGGGCGACCGCGTCACGCTGCGCGTCACCAACC  
GCCTGCGCGAGGACACCTCGATCCACTGGCACGGCATCATCTGCCACCGGCATGGACGGCGTCCCCGG  
CCTGAGCTTTCCCGGCATCGCCCCGGCGAGACCTTACCTACCAGTTCGACGTGGGCCAGAGCGGCACG  
TACTGGTACCACAGCCATTCCGGCTTCCAGGAACAGACGGGGCTGTATGGCGCCATTGTGATCGATCCCA  
AGCGCCCCGACCCGGTGCGGGCCGACCGCGACTATGTCGTCTGCTGTCCGACTGGACCGACGAAGACCC  
CATGAGCGTGTTCGCAAGCTCAAGGTGATGCCCGACTACTACAACTACATCCAGCCCACCGTCGGCAGC  
CTGATTGACGACGCGGAGAAGTCCGGCTGGAAGAACGCGCTGAACGAACGTCTCATGTGGCAGAAGATGC  
GCATGAACCAGACCGACCTGGCCGACGTCTCGGGCGCCACCTACACCTTCCTTACCAACGGCAAATCTCC  
TGCGGGCAATTGGACCGCCTGTTCCGTCCGGGCGAGCGCATCCGCCTGCGTTCATCAACGGGTCGGCC  
ATGACCTACTTCGATGTGCGCATCCCCGGCCTGAAGATGACGGTGGTGGCCGCCGACGGCCTGGCCGTGC  
GGCCCGTGGAGGTGGAAGAGTTCGCATCGCCGTGGCCGAGACCTACGACGTCATCGTCGAACCGCAGGA  
CGAGCGCGCCTACACCATCTTTTCGCAGGCCATGGACCGTTCGGCTATGCCCGCGGCACGCTGGCGCCG  
CGCGAAGGCATGCAGGCCGAGGTGCCGGCGCTGGACCCGGTGAAGTGTGACCATGATGGACATGGGTA  
TGCGCACGACATGCCCGCATGGACATGGGCGGGGGCAGGCAGGGGGCATGGACCACGGCGCTCAAGG  
CGCGATGAACCATGGCGCGCAGGGCGGCATGAGTCAAGGCGCCATGGGTGGGATGAACCACGCCGGTATG



GCTGGAATGGCGGGCATGAATCACGGCGGCATGGACCATGGCGCCATGTCCGGCAGCCCAGGCGCCAGCG  
AAGGCGGCATGGTCGAGGTCAAGCATCCCTACCCCGCCGAGCGCAGTCCCGCCAACTCCATGCTGCCCGA  
CATCGTATCGACCCGCCTGGATGATCCCGGCGTGGCCTGCGCAACAACGGCCGCCGCGTGCTGACCTAT  
GCCGACCTGCACTCGATGGTCGAACCCGCGGACAACCGGCAGCCGACCCGAGAAATCGAGCTGCACCTGA  
CCGGCAACATGGACCGCTACATGTGGTCGTTCAACGGACTGAAGTTCACCGAGGCCAAGCCCATCGTGCT  
CAAGTACGGCGAGCGCGTGCGCTTCGTGCTGGTCAACGACACCATGATGACGCACCCCATCCACCTGCAC  
GGCTTGTTGGAGCGACCTCGAGTCCGCCGACGGCAATTTCCAGGTGCGCAAGCACACGATCAGCCTGAACC  
CGGCGCAGCGCCTCAGTACCGCGTCAGCGCGGACGCGCGCGGCAACTGGGCCTATCACTGCCACTTGCT  
GTTCCACATGGAGGCCGGCATGTTCCGCGCGGTCGTCGTGGAATAG

>gi\_388476123\_Escherichia coli str. K-12\_23

ATGTCACAAACTATCGACCTGACCCTGGACGGCCTGTCTGCGGTCACTGCGTTAAACGCGTGAAAGAAA  
GTCTTGAACAGCGTCCGGATGTTGAGCAGGCGGATGTGTCTATCACTGAAGCGCACGTTACCGGGACTGC  
CAGTGCAGAACAGCTGATCGAAACCATCAAACAAGCGGGTTATGACGCATCTGTAAGCCACCCAAAGGCT  
AAACCGCTGGCGGAGTCATCAATCCCGTCGGAAGCACTGACAGCGGTTTCTGAGGCGCTCCGGCAGCGA  
CCGCCGATGACGATGACAGCCAGCAGTTGCTGCTGAGCGGCATGAGCTGCGCCAGCTGTGTACCCGCGT  
ACAAAATGCGCTGCAAAGCGTACCGGGCGTCACTCAGGCACGGGTAAACCTGGCGGAGCGTACTGCGCTG  
GTGATGGGCAGTGCCTCCCCACAAGATTTAGTGCAGGCGGTGAAAAAGCGGGCTACGGCGCGGAAGCGA  
TTGAAGATGACGCTAAACGCCGCGAGCGCCAGCAAGAAACCGCCGTCGCTACGATGAAGCGCTTCCGCTG  
GCAGGCAATTGTCGCACTGGCGGTGGGTATCCCGGTGATGGTCTGGGGGATGATCGGCGATAACATGATG  
GTCACCGCTGACAACCGCAGCCTGTGGTTGGTTATCGGCCTGATAACCCTGGCAGTGATGGTTTTCCGCCG  
GCGGCCATTTTTACCGCAGTGCATGGAAAAGCCTGCTGAACGGTGCGGCGACGATGGATACGCTGGTGGC  
GCTGGGTACTGGCGTGGCGTGGCTCTATTCGATGAGCGTCAACCTGTGGCCGAGTGTTCCCGATGGAA  
GCGCGACATCTTTATTACGAAGCCAGCGCGATGATTATCGGTCTGATCAATCTCGGCCATATGCTGGAAG  
CGCGCGCACGCCAGCGTTCTTCTAAGGCGCTGGAAAAGTTACTCGATTTAACCCCGCCGACGGCACGCCT  
GGTACTGACGAAGGTGAAAAAGCGTGCCTCTGGCAGAAGTGCAGCCAGGTATGTTGCTGCGCCTGACG  
ACCGGCGATCGCGTGCCGGTAGATGGCGAGATTACCCAGGGCGAAGCATGGCTGGATGAAGCGATGCTGA  
CGGGCGAACCAATCCCGCAGCAAAAAGGCGAAGGCGATAGCGTCCATGCCGGGACAGTGGTACAGGACGG

CAGTGTGCTGTTTCGTGCCAGTGCGGTTGGCAGCCATACTACGCTGTCACGAATCATTGCGATGGTGCGC  
CAGGCCCAGAGCAGCAAGCCAGAAATCGGTGAGCTGGCGGATAAAATCTCAGCCGATTTGTGCCGGTAG  
TGGTGGTTATTGCGCTTGTGAGTGCAGTGCAGGCAATCTGGTATTTCTTTGGTCCGGCACCCGAGATTGTCTATAC  
CCTGGTGATTGCCACCACGGTACTGATTATTGCCTGTCCGTGTGCGCTGGGGCTGGCGACCCGATGTGCG  
ATTATTTCCGGCGTCCGGCGGGCGGCTGAGTTTGGCGTGCTGGTGCAGGACGCTGACGCGCTGCAACGCG  
CCAGTACACTCGACACTGTAGTGTTGATAAAACCGGGACGCTGACTGAAGGGAAGCCGAGGTTGTGCGC  
AGTGAAAACATTTGCTGATGTTGATGAAGCGCAGGCATTGCGTCTGGCGGGCGGCACTGGAGCAAGTTCC  
AGCCATCCGCTGGCACGAGCGATCCTCGATAAAGCAGGTGATATGCAGCTACCGCAGGTCAACGGTTTCC  
GCACATTGCGCGGGCTGGGCGTGAGCGGTGAAGCTGAAGGTCATGCGTTATTGCTGGGCAATCAGGCGCT  
GTTAAATGAGCAACAGGTTGGTACCAAAGCTATCGAAGCGGAGATTACTGCTCAGGCATCGCAAGGGGCA  
ACGCCTGTGCTGCTGGCGGTTGACGGGAAAGCGGTAGCCCTGCTGGCAGTACGCGATCCGTTGCGTAGTG  
ATAGCGTGGCGGCGCTGCAACGCCTGCATAAAGCGGGATATCGTCTGGTGTGTTGACCGGGGATAACCC  
AACCACCGCCAATGCGATCGCAAAGAAGCAGGGATTGATGAGGTGATCGCCGGGGTGCTGCCGGACGGT  
AAAGCCGAAGCGATCAAACATCTGCAAAGTGAAGGACGTCAGGTGGCAATGGTGGGCGACGGCATTAAAG  
ACGCGCCAGCGCTGGCTCAGGCGGATGTCGGCATTGCGATGGGTGGCGGCAGTGATGTTGCCATTGAAAC  
CGCGGCGATTACCCTGATGCGCCATAGCCTGATGGGCGTTGCGGATGCGCTCGCTATTTCCCGCGCAACG  
CTGCACAACATGAAGCAGAACCTGCTCGGTGCGTTTATCTACAACAGTATCGGTATTCCGGTCGCCGCCG  
GTATTTTGTGGCCGTTCACTGGAACACTGCTTAACCCGGTAGTTGCCGGAGCGGCAATGGCGCTCTCGTC  
GATTACCGTAGTGAGTAACGCCAACCGGTTGCTGCGGTTTAAACCGAAGGAATAA

>gi\_38347830\_Serratia marcescens plasmid R478\_24

ATGCTGTTGAAAACGTCTCGACGAACTTCTGAAGGGGTTAACCCCTCTCTGGCGTAGCCGGAAGTCTTG  
GCGTATGGAGTTTCAATGCGCGTTCCAGTCTGAGCCTGCCAGTTGCCGCATCCCTGCAGGGTACTCAGTT  
TGACCTGACCATTGGTGAACGGCCGTCAATATCACGGGCAGTGAGCGTCAGGCCAAAACAATCAATGGA  
GGCCTGCCGGGGCCCGTTCTTCGCTGGAAAGAAGGTGACACCATTACCCTGAAGGTCAAAAACCGTCTTA  
ATGAACAGACGTCCATTCACTGGCACGGCATTATTCTCCGGCCAATATGGATGGTGTCCGGGGCTGAG  
TTTTATGGGCATAGAGCCTGATGATACCTACGTTTACACCTTAAGGTTAAGCAGAACGGGACTTACTGG  
TACCACAGCCATTCCGGTCTGCAGGAACAGGAGGGGGTATACGGTGCCATTATCATCGATGCCGGGGAGC

CAGAACCGTTTACTTACGATCGTGAGCATGTGGTCATGTTGTCTGACTGGACCGATGAAAATCCTCACAG  
CCTGCTGAAAAAATTAACAAAACAGTCGGATTACTACAATTTCAATAAACCAACCGTTGGCTCTTTTTTC  
CGCGACGTGAATACCAGGGGGCTGTCAGCCACCATTGCCGATCGGAAAATGTGGGCTGAAATGAAAATGA  
ATCCGACTGACCTCGCGGATGTCAGTGGCTACACCTACACCTATCTCATGAACGGGCAGGCCCGCTGAA  
AAACTGGACCGGACTGTTCCGTCCCGGTGAAAAGATACGCTTACGGTTTATCAACGGCTCGGCAATGACC  
TATTTGATATCCGATATCCCGGGCTGAAAATGACGGTCGTGGCTGCAGATGGCCAGTATGTAAACCCGG  
TTACCGTTGACGAATTCAGGATTGCCGTTGCCGAAACCTATGATGTCATTGTGGAGCCTCAGGGTGAGGC  
CTATACCATCTTCGCACAATCCATGGACAGGACCGTTACGCTCGAGGGACACTGGCCACGAGAGAGGGG  
TTAAGTGCTGCCGTTCCCCCCTCGATCCCCGTCCTCTGTTGACCATGGAAGATATGGGTATGGGGGAA  
TGGGACATGATATGGCAGGAATGGACCACAGCCAGATGGGAGGCATGGATAACAGCGGAGAGATGATGTC  
TATGGACGGTGCTGACCTTCCGGATAGCGGGACATCCTCCGCGCCCATGGATCACAGCAGCATGGCCGGT  
ATGGATCATTCCCGGATGGCCGGAATGCCGGGTATGCAAAGTCATCCTGCGTCAGAAACGGATAACCCAC  
TGTTGATATGCAGGCGATGAGCGTCTCTCCGAAATTAATGATCCGGGTATTGGTCTTCGAAATAACGG  
AAGAAAGTTCTCACGTACGCGGATTTGAAAAGCCGCTTTGAGGATCCTGACGGACGTGAACCTGGCCGT  
ACCATAGA ACTGCATTTAACCGGCCACATGGAAAAGTTTGCCTGGTCATTTAACGGAATCAAGTTTTAG  
ATGCCGCACCGGTGCTGCTGAAATACGGTGAGCGGCTCAGGATCACGCTGATCAACGATACCATGATGAC  
TCACCCATTACCTGCATGGTATGTGGAGCGATCTGGAAGATGAAAACGGTAATTTTCATGGTTGTA  
CACACAATAGATGTTCCCTGGTACAAAACGCAGTTACAGAGTGACAGCAGATGCGCTTGCCGCTGGG  
CGTATCACTGCCATTTGCTCTATCACATGGAAATGGGAATGTTTCGTGAAGTCCGGGTGGAGGAATGA

>gi\_21240774\_Xanthomonas axonopodis pv. citri str. 306 chromosome\_25

ATGTCTTTGATCCCCGTTTTCCACGGCTCAACCGCCAGCGCCTGAGCCGGCGCCGCTTCGTCCAGG  
GCCTGGCCCTGGGCGGCATCGCCGCCAGCGCCTGTGGCGCAACGATGCGCGCGCCGCGGCCAGGCGAA  
CACGCCCCTGCTGCGCGGAAGCAGCCAGTCGCTGCAGATCGGCCGCTGCCGGTCAACTTACCGGGCGC  
CCCCGCTCCGCAATCACCGTCAACCGAGCCTGCCGGCACCCACCTTGCCTGGCGCGAGGGCGACACGG  
TGAGCGTGCGCGTGCGCAACGCGCTGACCGACCAACCCACCTCGGTGCATTGGCATGGCCTGTTGCTGCC  
GGCCAACATGGACGGGGTGCCGGGCATGAGTTTCGACGGCATCGCGCCGGGCCAGGAGTATCACTACCGC  
TTTGCCTGCGCCAGTCCGGCACCTACTGGTACCACAGCCATTCGATGTTTCAGGAGCAGTCAGGGCTGT

ATGGCGCCATCGTCATCGACCCGCTGGTGCCGCCGCGTACCGGCACGATCGCGAACATGTGGTGCTGCT  
CTCGGACTGGACCGATCTGGACCCGGCCGCCCTGTTCCGTCGTTTGAAACAGATGCCGAGCCACGACAAC  
TACGCGCAGCGCACCGTTCGGCGATTTTCTACGCGATGCGCGCGACGACGGCCTGCGCGCCACGCTGGCCG  
ACCGCGGCATGTGGGGGCGCATGCGCATGACGCCACCGACCTGTCCGACGTCAACGCCAACACCTACAC  
CTACCTGCTCAACGGCGTGGCACCGGCCGCAATTGGACCGGCTTGTTCAAACCCGGCGAGAAGGTGCTG  
CTGCGTTTCATCAATGGCTCGTCGATGACCTACTTCGACATCCGTATCCCCGGCCTGCGCATGACCGTGG  
TGGCCGCCGACGGGCAATACGTGCATCCGGTCAGCGTGGACGAACTGCGCATCGCCGCGGCCGAAACCTT  
CGACGTGATTGTGAACCGCTCGGCCAGGATGCGTTTACGTTATTCGCGCAGGACATGGGCCGACCGGC  
TTCGCTGCGGCACGCTGGCAGTGCAGCACGGCTTGCAGGCGCCGATTCTGCGCTGGATCCGCGCGCCA  
TCCTGACCATGCAGGACATGGGGCATGGCGATGGCATGGATCACGCGTGCCCGCAATGCACGGCGCGCC  
CGGGATGCTGGCGGCGCATGGGATGCACACCATGCACTCGCATGACGATGCCAAGGCACACGACAAGGCG  
CCGCATCATTCCGCCAGCGAAACCGGCAACCCGCTGATCGACATGCGCAGCAATGCCACTGCACCGCGCC  
TGGACGACCCCGCGTGGGCCTGCGCGACAACGGCCGCCGCTGCTGTGCTACGCCGATCTGCATAGCGT  
GTTTCGACGACCCGGATGGGCGCGAACCGGGCCGTGACATCGAGCTGCATCTGACCGGGCATATGGAAAA  
TTCGCATGGTCTTCGATGGCATCGCGTTCGCTTCCGCGCAACCCTTGCAGCTGCAATACGGCGAGCGCC  
TGCGCATCGTGCTGGTCAACGACACCATGATGCAGCACCCCATCCATCTACATGGCATGTGGAGCGACCT  
GGAAGATGCGCACGGCAACTTCCAGGTACGCAAGCACACCATCGACATGCCGCCCGGCACCCGCCGACC  
TACCGCGTGCCTGCCGATGCGCTCGGCCGCTGGGCGTATCACTGCCATCTGCTGTACCACATGGAAGCGG  
GCATGATGCGCGAAGTGCGGGTGGAAGCATGA

>gi\_16763390\_Salmonella enterica str. LT2 chromosome-26

ATGTCTCAAACATCGACCTGACCCTGGACGGTTTGTCTGCGGTCATTGCGTTAAACGCGTGAAAGAAA  
GTCTTGAACAACGTCCGGATGTTGAGCTGGCGGACGTCACCGTAACCGAAGCGCACGTTACCGGTACCGC  
CAGTGCGGACGCGTTAATTGAAACCATCAAACAAGCCGGGTATGGCGCGACGTTAAGCCACCCAAAGGCT  
AAACCGCTGACGGAGTCATCAATCCCGTCGGAAGCACTGGCAGCGGTTCTCATGAGCTTCCGGTAGCGA  
CGGCCGATGAAGAAAGCCAACAGTTGCTGTTAAGCGGCATGAGCTGCGCCAGTTGTGTACCCGCGTACA  
ACATGCGCTACAAAGCGTACCGGGCGTCACGCAGGCACGGGTAAACCTGGCGGAACGCACTGCGCTGGTG  
ATGGGCAGCGCGTCCGCCGCTGATTTAGTGCAGGCGGTGGAAAAAGCCGGCTACGGCGCAGAAGCGATTG

AAGATGACATCAAACGCCGCGAGCGCCAGCAGGAAACGCCATCGCCACCATGAAACGTTTTCGTTGGCA  
GGCAATCGTCGCCCTTGC GGTCGGTATAACGGTCATGGTCTGGGGGATGATCGGCGATAACATGATGGTG  
ACCGACGACAACCGCAGCCTGTGGCTGGCTATTGGCCTGATCACGCTTGCGGTGATGGTCTTTGCGGGCG  
GTCACTTTTACCGTAACGCGTGAAAAAGCCTGCTGAACGGCACGGCGACGATGGATACGCTGGTGCGCT  
CGGCACCGGGGTTGCCTGGCTCTACTCCATGAGCGTCAACCTGTGGCCGACGTGGTCCCGATGGAAGCG  
CGGCACCTCTATTACGAAGCCAGCGCGATGATTATCGGTTTGATTAATCTCGGACACATGCTGGAAGCGC  
GCGCCCGTCAGCGTTCCTCAAAGCGCTGAAAAAATTA CTGATCTCACCCCGCCACCGCACGCGTCGT  
GACAGAAGACGGCGAAAAAAGCGTCCCGCTGGCGGACGTT CAGCCAGGGATGCTGCTGCGGCTCACTACC  
GGCGATCGCGTGCCGGTGGATGGCGAAATTACCCAAGGCGAAGCGTGGCTTGATGAAGCCATGCTGACCG  
GCGAACCTATTCCGCAGCAAAAAGGCGAAGGCGACAGCGTTCATGCCGGCACCGTCGTCCAGGACGGCAG  
CGTCCTGTTCCGCGCCAGCGCGGTGGGCAGCCATACCACGCTGTACGCATTATTCGCATGGTACGCCAG  
GCGCAAAGCAGTAAACCGGAAATTGGCCA ACTGGCCGATAAAATCTCCGCGGTATTCGTTCCCGTCGTCG  
TGCCATTGCGCTGTT CAGCGCCGCTATCTGGTATTTCTCGGGCCGGCGCCGCAAATTGTTTATACGCT  
GGTCATCGCCACCACCGTACTGATTATCGCCTGCCCTGCGCATTAGGCCTGGCGACGCCAATGTCGATT  
ATTTCCGGCGTAGGCCGCGCTGCCGAATTCGGCGTGCTGGTACGCGACGCCGATGCCCTGCAACGCGCCA  
GTACGTTGGATACCCTCGTTTTTGATAAAACCGGGACGCTGACGGAAGGCAAGCCGCAAGTGGTGGCGAT  
AAAAACCTTTAACGCGTTGAGGAAGCTCAGGCATTACGTCTGGCTGCCGCGCTCGAACAAAGGCTCCAGC  
CACCCGCTGGCCATGCGATTCTGGAAAAAGCCGGCGATGATAAACTGCCGACGGTGAACGGTTTTAGAA  
CGCTGCGCGGACTGGGCGTCAGCGGTGAAGCGGAAGGTCATCAACTGCTTCTGGGGAACCAGGCGTTGCT  
GAACGAACAGCACGTCGCCACGGATGACATGACGGCGGAAATCACCGCGCAGGCCTCGCAAGGCTCGACT  
CCGGTCCTGCTGGCGATTGACGGTAAAGCGGCGGCTTACTGGCGGTACGCGATCCATTGCGCAGCGATA  
GTATTGCCGCGCTTGAACGCCTGCACAACGCCGATACCGTCTGGTAATGCTCACCGGGGATAACCCAAC  
GACGGCTAACGCGATTGCCAAAGAAGCGGGTATTGACGAAGTCATTGCGGGCGTTCTGCCGGATGGCAAA  
GCCGATGCGATTAAACGCCTGCAAAGCCAGGGTCGTCAGGTTGCGATGGTGGCGATGGTATCAACGATG  
CGCCCGCGCTGGCGCAGGCGGACGTCGGTATCGCGATGGGCGGGCGGCAGCGATGTGGCGATTGAAACCGC  
GGCGATTACGCTGATGCGCCATAGTCTGATGGGCGTGGCGGATGCGCTGGCCATTCGCGCGCGACGTTG  
CGCAATATGAAACAAAACCTGCTTGGCGCATTTATCTACAACAGCATTGGTATCCCGGTGGCCGCCGTA

TTCTGTGGCCGTTTACCGGTACCTTGTTAAACCCGGTAGTAGCAGGCGCGCAATGGCGCTGTCTTCCAT  
TACCGTCGTCAGCAATGCCAACCGGCTATTGCGTTTTAAACCGAAAGCGTAA

>gi\_71064581\_Psychrobacter arcticus 273-4 chromosome\_27

ATGCATAAACAGAACATACTGAACCGCCGACGTTTTTTAAACCGGATCCTCTGCTGTTCTTGGCGCCTCT  
TGCTGCCGACCATTGCCAGCAGCGCGTTGGGACATTCGAGTCGCTCGGGCAATCAGGGCGCTACTATCAA  
TAGTGATCAAAACACTCATAAAGTGCCTGTATTGACCGGTAAAGAGTTTGATTTATACGTCAGGAAACAG  
TCCGCTATTGTTAACGGTAAAAAGAGCATGGCGACGCTCATCAATGATTCACTGCCAGCACCGACGCTAA  
AGATGCGTGAAGGCGATACGGTGGTGATACGTGTTTATAATCAGATGGATGAATCAACCTCCATTCATTG  
GCATGGATTGCTGGTACCGTTTGAGATGGATGGGGTGCCGGGCATTAGCTTTGATGGTATTCCTGCGAAC  
AGCACCTTTACTTATAAATTTGAGCTCAAACAATCAGGCACCTATTGGTATCACTCACACAGTGGGTTCC  
AAGAACAAACCGGTATGCTGGGTGCTATTGTGATTGAACCTAAAGGGCGTGAGCGTCATCCTATCGACGA  
AGACCACGTGATCGTGCTTAGTGATTGGACCAGCCGCAACCCGCATAATCTTTGAAGCTGCTCAAACAG  
CGCTCCGACTTTGATAATTATCATCTGCCAGACTTCAAGAAGCTACTGTCTGATATTGCCGAAACAGATA  
TGAAAACCGCGTTTGATAAGCGCAAATGTGGAATCAGATGCGCATGATGCCCACTGATTTTACTGACTT  
GTCGGGCGAAAAACCTTTACCTACCTTATCAATGGCAAACAACCGCGGCTAATTGGGCACAAATAGTC  
AAAGCAGGACAGCGCGTTAAGCTACGCTTTATCAATGCCTCAGCGCAAACCATCTTTGATGTGCGCATA  
CTGGTCTCAAATGACTGTGGTGGCAACCGATGGCATTGATGTCGCACCAGTTTCGATTGATGATTTTCG  
CATTGGCGTGGCTGAGATTTATGATGTCATTGTCACCCCGACTAAAGATGCGCATACCATATTCGCCAA  
AACATAGACCGTTCAGGTTATGTCGCAGCAACGCTTGCCACCAAAGAAGGCGCTCGTGCGGCAACGCCTG  
CCATGGACAAGATTGAATGGCTCACAATGGCAGATATGATGGGCGCTATGGGTGCTGATGGTTATAAAGC  
CAAGCATGCCAAAACAGAGTATGATTTTAAAGAGCGATATGCGTGTGGACAGTCCACGTATGAACCTTGAT  
GATCCCGGTATCAACCTGCGCAAGATTAATAGAGAGGTGCTGAATTATAGCCAGCTGCGCTCTGTGATG  
AGGCAATATTTGCGGAGCAGCGCCCGCTACCCGAGAGATCGAGCTACATTTAACCGGTAACATGGAACG  
CTATATTTGGGCATTTGATGGGGTTAAGTTCAAGTGAGGCGACACCGGTCAATATTAAGCCGGGTGAGCGC  
GTGCGTATTACCTTAGTCAATGACACGATGATGAATCATCCGATGCATTTACATGGCATGTGGAGCGATT  
TGCGCATGCCTAACGGCGAGTTTCAAGTACGCAAGCATACCATTATGGTGCAACCAGCACAAAAAATCAG  
CTTTGATGTCACAGGGGAAGCTGGTCGATGGGCATGGCATTGTCATCTGCTCTATCACATGGAAGCCGGT

ATGTTTAGAGAAGTGGCGGTCATTTAA

>gi\_77361923\_Pseudoalteromonas haloplanktis TAC125 chromosome\_28

ATGGGTTTTAAAAAGTCATTGCAGCACATTTCAAAGCCACGTAGGCGTTTTGTTCAAGGATTAATTGCAG  
GCGGTGTGCTGGCAGCTTTTCCAAGTGTTCATGCAGCATCATCTTAGCGGCTTCAACATTAACAGG  
TACTGTGCCTGAGTTGAGCGGTAAAGTTATTGACCTGGTTATTGATGAGTCCCCAGTAACTTTACCGGT  
GTAGTGCATATGGCAACCACCATTAATGGCTCTATTCCGCGCCAACATTACGCCTTAAAGAAGGTGACG  
ATGTGACCATTTCGCGTTACCAACAATTTAGCGGTACCTAGCTCTATCACTGGCACGGAATTATTTTACC  
GTATCAAATGGATGGTGTACCGGGCATTAGCTTTAAAGGCATTATGCCTGGCGAAACGTTTGTATAAA  
TTAAGTTACAACAAAGCGGTAAGTATTGGTATCACTCACACAGTGGCTTTCAAGAAATGACCGGTATGT  
ATGGGGCGTTAATTATTGAGCCTCGTGAGCAAGATGTTATCAGCGCAGATAATGAACATATTATTCAACT  
CTCTGATTGGACTGATGATGATCCTATGGAGTTATTCCGTAATTAATAAATTCAGGGGGATGTGTTAAC  
TTAATCAGCCCACTGTACCTGAGTTTTTTGATGACATAGCAACAAGCGGCGTTGCTAATGCACTTCAAC  
GACGTGAAATGTGGAACCAGATGCGAATGAGTCCAACCGATTTAGCTGATTTATCGGCTTCGGCAATGAC  
CTATTTAATGAATGGTACTGCGCCAATGGCTAATTGGCGTGGGCTGTTTAAAGCGGGCGAAAAAGTACGT  
TTAAGATTTATTAATGGCTCAAGTAACACCTTTTTTTGATGTACGTATCCCAGAGTTAAAATTAAGTGGG  
TACAAGCAGATGGACAAAATGTTGAACCCGTTACCGTAGATGAGTTTCGCTTTGGTCCAGGTGAAACCTA  
CGATGTGGTTGTTGAGCCTAAAAATGACGCATACACAATTTTTGCACAAAGCATGGACCGCTCAGGTTAT  
GCCAAAGGGACTTTGTCTGTCGCTGCTAATATTGATGCGCCAGTGCCTGCACTTGACCCAGTTGAGTGGT  
TAGCAATGCGGGATATGATGGGCAATATGGATCACTCTGCTATGCCTGGAATGGATCACAGCGCTATGGG  
CCACGCTAGCATGGACAAAACAGTATGGATCAGGGGGCAATGGATCATAGCACAATGGACCACGGTGCA  
ATGGCAATGGACCATAGTAAGCATAATATGGGTAAAAACCCACTGGCTGTTCCAAGTCAGAAAAGTTCGCC  
ACGCTAAAACAGAATATGGCGCCTCAGTTGATATGCGCGTTGATACGCCACGCACAACTTAGACGATCC  
TGGTATTGGGCTGCGCAATAACGGCCGTCGTGTTTTAACACTTGCAGATTTACGCTCTCTTGATGGCATA  
GTTGACCACCAAGCGCCTGAAGCCGAAATTGAGCTGCACTTAACCGGCAACATGGAACGCTACAGCTGGT  
CTTTTATGAGCTTAGAGTTTGGTAAAAGTACCCCTGTGCATATGAAGCATAATCAGCGGGTACGAGTTAT  
TTTACAAAACGATACCATGATGACACACCCTATGCATTTACATGGTATGTGGAGCGACTTGGAGAACGAT  
CAAGGTGATGTGTTAGTTCGCCGCCACACCATAATGGTACAGCCCGCCAAAGAATTAGCTTTTTAACTA

CGCCACATGATGTTGGTCGTTGGGCTTGGCATTGTCATTTACTGTTTCATATGGATGCAGGTATGTTTAG  
AGAGGTGGTTGTATCATGA

>gi\_28867243\_Pseudomonas syringae pv. tomato str. DC3000 chromosome\_29

ATGCCACCCGAACATCAAGACGCACCTTCGTGAAAGGGCTTGCCGCCAGCAGTATTCTGAGTGGGCTGG  
GGCTCTGGCGCAGCCCGCGTGGGCACTCCCAATCCGGGCCAGCCTGACGGGTTGTCCGGCACCGAGTT  
CGACCTGACCATCGGCGAAACCCAGGTCAATATCACCGGCAATGCCAGAACCGCGATGACTATCAACGGC  
GGCATTCCAGGCCATTGTTGCGCTGGCGCGAGGGCGACACTGTCACCCTGCGGGTAAAAAACCGCCTCG  
ACGAAACCACCTCCATTCACTGGCACGGCATCATCCTGCCGGCCAACATGGACGGCGTGCCGGGGCTGAG  
CTTTGATGGCATTGCGCCGACGGCATGTATGTCTATCGCTTCAAAGTCAGGCAGCACGGCACGTATTGG  
TATCACAGCCATTCAAGTTTTAGGAGCAGTCGGGCGTCTATGGGCCACTGGTGATCGACGCCAAAGAAC  
CCGAGCCGTTACCTACGAGCGCGAGCACGTGGTCATGCTCACCGACTGGGCAGACGAAGACCCGGCCCCG  
GGTGATGAAAAAGCTCAAGAAACAGTCGGACTACTACAACAATAACAAGCGCACCGTCGGCGACTTCATC  
AACGACGTCGGCGAAAAAGGCTGGAGCGCGACCACCGCCGAGCGCTGGATGTGGGCGCAGATGAAGATGA  
ACCCGACTGATCTGGCGGACGTCAGCGGCGCAACCTACACCTACCTGATGAACGGCCAGGCGCCAAACAT  
GAACTGGACCGGGCTGTTCAAACCCGGCGAGCAGATTCGCCTGCGCTTTATCAACGGCTCGTCGATGACC  
TATTTGATGTGCGCATTCCCGCCTGAAGATGACCGTGGTCGCCAGCGACGGCCTGCACATCAAACCGG  
TGTTTGTGATGAACTGCGGATCGCGGTGGCAGAGACATTCGACGTGATCGTCGAGCCGGCTGACGGTGC  
CTACACGCTGTTCCGCAATCGATGGACCGCACCGGCTTTGCCGAGGCACTTTAACCAGCAGGCCCGGC  
ATGCAGGCCGAGGTCCCGCCTCTCGACCCGCGTCCGCTGCTGAGCATGGACGACATGGGCATGGCGGGCA  
TGGATCACGGCAGCATGAACCACAGCGCCAAGCCGGCAATGGACGGTATGGACCACAGCAAGATGGACCA  
TGAATCGATGCCCGCATGGACCACGGCACGATGCCGATGCAAGAAGCACCGGTCATGCAGTCGCACCCG  
GACAGCGAAAGGAATAATCCGCTGGTCGATATGCAGGCCATGAGCACGTCGGCAAAACTCAATGATCCGG  
GCATCGGCCTTCGGGACAACGGCCGTAAGGTCCTGACCTACGCCGACCTGCGCAGCACCTTCGAGGACCC  
GGACGGCCGTGAGCCGAGCCGGACAATCGAACTGCACCTGACCGGGCACATGGAAAAATTGCCTGGTGC  
TTCGATGGCGTGAAGTTCTCCGACGCCAAGCCACTGATGCTCAAGTACGGCGAGCGGGTGCATCGTGC  
TGGTCAACGACACGATGATGACTCACCCATTACCTGCACGGCATGTGGAGCGATCTGGAAGACGAAAA  
CGGTCAGTTCATGGTGCGCAAACACACCATCGACATGCCCCGGGGTACGCCGAGCTACCGCGTCACC



GCTGATGCTCTGGGCCGTTGGGCGTATCACTGTCATATGCTGTACCACATGGAAATGGGTATGTTCCGCG  
AAGTGCGGGTGGAAGAATGA

>gi\_26986745\_Pseudomonas putida KT2440 chromosome\_30

ATGCAAAGCAAACCACGAGACGATCTTCGTCAAAGGCCTGGCCGCTACTGGATTACTGGGTGGACTGG  
GCATGTGGCGCGCGCCGGTCTGGGCTGTGACCAGCCCTGGCCAACCGAATGTTCTGACAGGCACCGATTT  
TGATCTCTACATCGGTGAGTTGCCGGTCAACATTACCGGCACTGTACGTACAGCGATGGCAATCAACGGC  
TCCATTCCCGGGCCCATCCTGCGCTGGCGCGAGGGCGATACCGTCACGCTGCGTGTGCGCAACCGCTTGC  
AGCAGGACACCTCCATCCACTGGCACGGCATCATCCTGCCGGCGAACATGGACGGCGTGCCGGGCCTGAG  
CTTCCATGGCATCGCCCCAGACGGCATGTATGAGTACAAGTTCAAGGTCCAGCAGAACGGCACCTACTGG  
TACCACAGCCACTCCGGTTTCCAGGAGCAGGTCGGGGTGTATGGTGCCTGGTCATCGATGCGAAAGAAC  
CTGAGCCGTTACCTATGACCGGGACTACGTGGTCATGCTCAGCGACTGGACGGATGAAGACCCTGCACG  
GGTGCTGTCCAAGCTCAAGAAGCAGTCCGACTACTACAACCTACCACAAGCGCACGGTGGGCGATTTTCGTC  
AACGATGTGAGCGAAATGGGCTGGTCCGCCGCGGTAGCCGACCGCAAGATGTGGGCCGAGATGAAAATGA  
GCCCCACCGATCTCGCTGATGTGAGCGGCTACACCTACACCTACCTGATGAACGGCCAGGCCCCGGACGG  
TAACTGGACGGGCGTGTTCAAGCCGGGCGAGAAAATCCGCCTGCGCTTCATCAATGGCTCGGCCATGACG  
TATTTTCGATGTGCGAATTCCCGCCTGAAGATGACGGTTGTCGCGGCGGATGGGCAGCATGTCAAACGCG  
TTGCGGTGACGAGTTCCGCATCGCCGTTGCCGAAACCTACGACGTCATTGTTGAGCCGGAAGACGAGCA  
GGCTTACACCATTTTTGCTCAATCCATGGATCGCACAGGCTACTCCAGAGGCACTTTAGCCGTTTCGCGAA  
GGTATGCAAGCTGCAGTTCCGGCAGTTGATCCGCGCCCTTCATCTCAATGAGTGATATGGGTATGGATC  
ACGGCAGCATGGCCGGCATGGACCACGGCAACATGGCCGGTATGGACCACAGCAAAATGGCTGGGATGGA  
CCACGGCAACATGGCCGGCATGGACCACAGCAAAATGGCTGGGATGGACCACGGCAACATGACCGGCATG  
GACCACAGCAAAATGGCTGGGATGGACCATGGCAGCATGGCCGGCATGGATCACAGCAAAATGGCTGAGA  
TGGACCACGGCGGCATGGCCGGCATGGACCACAGCAAGATGGCTGGGATGGACCAAGGCGGCATGGCCGA  
TATGGACCATAGCAAGATGGCTGGGATGGACCAAGGCGGCATGGCCGATATGGACCACAGCAGCATGGAA  
GGTATGGGTGGCGCCATGCAGTCTACCCAGCCTCAGAGACTAACAACCCCTTGGTTCGACATGCAGACTA  
TGAGTCCAACGCCTAAGTTGGACGATCCGGGAATCGGCTTGCGCAACAATGGACGTCGTGTCCTGACCTA  
TGCGGATCTGCGAAGCACGTTTATTGATCCAGATGGACGTGAACCAGGGCGCACCATCGAGCTGCATCTC

ACAGGCCATATGGAGAAGTTCGCCTGGTCATTTGACGGCGTCAAATTTCCGATGCTGAACCCCTACGCC  
TCAAATATGGCGAGCGTCTGCGAATCACTTTGGTCAACGACACCATGATGACTCACCCCATCCACCTCCA  
CGGAATGTGGAGCGATCTGGAGGATGAGGACGGTAATTCATGGTTCGAAAACACACCATCGACATGCCT  
CCAGGCTCAAAACGAAGCTACCGAGTAACCGCGGATGCTTTGGGCCGTTGGGCCTACCACTGCCACCTAC  
TGTTCCATATGGAAATGGGCATGTTCCGAGAAGTCCGCGTGGACGAATGA

>gi\_28197945\_Xylella fastidiosa Temecula1 chromosome\_31

ATGGGAGTCTCTATGAACACTGTTACCTTCCCTTCCCAGGGAGGCATTGACCGGCGTCGCTTCTAAAAG  
GCTTGGCGTTGGGAGGCGTCGTCGCCGTACCGGCTTATGGCGTCTTCTGTCCATGCAGCCAACCTGA  
GTTGCCGCACTGCAGCGGCGTACCACTCCCCTAGAGCTGCGTATCGGACAGTCCAGCGTTAATTTACC  
GGACGTATGCGTCCAGCCATCACCGTTAATAACAGCTTGCTGGACCCGTATTGCGTTGGCGCCAAGGCG  
ATACGGTCCAAATACATGTCACCAATACCTTGCCCGATGTGATGACCTCAATTCATTGGCACGGCATCGT  
TCTGCCCTCCAACATGGATGGCGTACCGGGCATGAGTTTCGACGGTATTGCACCAGGCGAACACTATCTA  
TACCGCTTTCAGTTACACCAGTCTGGGACCTACTGGTACCACAGCCACGCCATGTTTCAAGAACAGGCCG  
GCCTGTATGGAGCGTTGATTATTGATCCACTGGAGCCGCTCCCTACCGCGCCGACCGCGAGCACATCCT  
CCTATTCTCAGATTGGACCGACCTGGACCCTGCCGCACTGTTTCGCAGGCTCAAAAAAATGTCCTCTTAC  
GACAACACCTACCAACGCACCGTCCGCGATTTCTTCATGACATACACCGTGATGGCCTGCGCACACAC  
TGCCGATCGCCGCATGTGGGGCAGAATGCGGATGACCCCGACAGACCTGTCCGATGTCAATGCCCATA  
CTATACCTACCTGCTGAACGGCACCCAGCCAGCCGCCACTGGACTGGATTGTTCCGCCCCGGAGAAAAA  
GTGCTATTACGGCTGATTAATGGTTCGGCGATGACCTATTTGACGTCCGTATTCCAGGCCTGAAACTGA  
CCGTTGTGCCGTGGATGGCCAATACGTCCATCCGGTGACCGTGGATGAATTACGTATTGCCCTCGCCGA  
AACCTATGATGTCCTGATCCAACCCACGGCCAGGATGCCTTTGCAATCTTTGCCAGGACATGGGCCGC  
ACCGGCTACGCTGCGGCACCCTCGCCGTGCGTCCCGGCTTACACGCCCCCTGCCGGCATTGGACCCGC  
GTCCTCGCCTGACAATGCAGGACATGGGACACGGGATGACGCATGATCAGCATGGGAGTCGCGTCTCTGA  
AATGGCGGACATCCCAGGAATGACCCATCCTGGCAGACTGGGCGATCATGCCAGCCACGCCAACAGCCT  
CCTGCGCAGCCCCCTCATGGTTTACATAGCCTTCCGGCGGACAGAACAGCGCCGAGCATCCTGCCAGCG  
AACAGAACAATCCCTTGGTGGACATGCATGTGGACGCACCACAGCCGCGTTTGAATGATCCCGGCATTGG  
CTTGCGTGACAATGGCCGCCACGTCTTGACGTACGCTGATCTGCATAGCCTGTTTCGATGATCCGGATGGA

CGTGAACCAGGGCGTGAGATCGAATTACATCTCACCGGCAATATGGAGAAATTCGCCTGGTCGTTTGATG  
GCATCCCATTTGCCTCCGCGCAACCCTTACGACTCAACTACGGTGAACGTGTACGCATCGTCTTGGTCAA  
TGACACCATGATGGCGCACCCATTACCTGCACGGCTTATGGAGTGACTTAGAGGATGCCAACGCCGCG  
TTTCAGGTCCGTAAACACACCATCGATATGCCGCCGGGTACACGCCGAGCTACCGTGTGCGTGCCGATG  
CACTGGGGCGCTGGGCCTACCACTGCCACATGCTGTACCACATGGAAAGCGGCATGATGCGTGAAGTACA  
GGTGCGCCCATGA

>gi\_190572091\_Stenotrophomonas maltophilia K279a chromosome\_32

ATGTGCGATGATGATTTTCGTGGTCCACGCGGTGGACCGCTGCTGCCTTCGCGGCGGCGATTTGTCCAAG  
GCTTGGCCTTGGGAGGCGCAGTCGCAGGATTAGGTTTCTGGCCAAAGCCAGTTGGGCGCTCAAGGGGCC  
GGGACAACCCAACGTACTATCGGGCACTGAGTTTGACCTGACCATTGGCGAGACGCCGATGAACTTACC  
GGCAAGACCCGCACCGCGATCACGGTCAACGGGTCCGTTCCGGCGCCGTTGCTGCGGTGGCGGGAAGGCA  
CCACGGTCAACTTGC GCGTCTCCAATGCATTGCCCGCTAACTCCATCCATGGCGCGGACACCTCCATCCA  
TTGGCACGGCATCATTTTCCGGCCAACATGGACGGCGTGCCGGGTCTGAGCTTTGACGGTATCGGACGT  
GGTGAGACCTACCACTACCGGTTACCCTGCATCAGGGCGGAACCTACTGGTACCACAGCCACTCAGGGT  
TCCAGGAACAAGCCGGGCTCTATGGCCCGATCGTCATCGACCCATTGGAGCCGGAGCCCTTCAGTTTCGA  
TCGCGACTACGTCGTGATGCTGAGCGATTGGACAGACCTGGACCCGACGGCCCTGTTTCGATCGTTTGAAG  
AAGATGCCGGGCCATGACAATTACTACAAGCGCACGGTCGGCGATTTTGC GCGCGATGTGAAGCGCAACG  
GCCTGTGCGCCACGTTGGAAGATCGCAAGATGTGGGGCGTGATGCGGATGACGCCACGGACCTGTCCGA  
CGTCAACGCCAACACCTACACCTACCTGATGAACGGCACGACCTCACTGGGCAACTGGACCGGTTTGTTC  
CGCAGTGGCGAGAAGGTGCGCCTGCGTTTCATCAATGGCTCTGCCATGACGTACTTCGATGTGCGTATTC  
CGGGGCTGAAGATGACCGTGGTGGCGGCAGATGGCTTGTATGTCCATCCGGTTTCCGTCGACGAGTTCCG  
CATCGCGGTAGCAGAAACCTTCGATGTGATCGTGGAGCCCTCCGGGCAGGACGCATTACCATCTTTGCC  
CAAGACTCCGGTGCACCGGCTACATCAGCGGCACGCTCGCTGTGCGCGAAGGATTACGCGCGCCCGTTC  
CGTCTGTGGATCCCCGGCCGCTGCTGACGATGGCAGACATGGGCATGGATCATGGGTCGATGGATATGTC  
TGGCGGCAGCAAGGGCATGGAAGGCGGCTGTGGTGC GGCCATGGGCATGCCTGGCATGACCCACCTGTC  
AGCGGTAACGCGACCTCGGCCCATGCAGGCCATGCGATGCCCGCCGCCGCGATGGTGCCATGGCAGGCA  
TGCAGCACGGGGGCATGCAATCACACCCTGCTAGCGAGACCAACAATCCCCTGTTGGACAACCAAGCCAT

GAGCGTGAGTTCGCGCTTGATGATCCGGGCAATGGCCTGCGCGATAACGGCCGTCATGTGCTGACGTAT  
TCCATGCTCAAGAGCACCTTTGAAGACCCTGACGGACGCGACCCCGGTGCGGAGATCGAGCTGCATCTGA  
CCGGACACATGGAGAAATTCTCTGGGGCTTCAACGGTCAGAAGTTTTCCGATGTGAGCCGCTGCGGCT  
GAACTACGGCGAGCGTATGCGCATCGTATTGGTTAACGACACGATGATGACCCATCCCATCCATTTGCAC  
GGCATGTGGAGTGACGTGGAGGACGACAACGGCAACTTCATGGTGCGCAAGCACACGGTGGATATGCCGC  
CAGGTAGCCGACGCACGTATCGCGTGCGTGCCGATGCGTTGGGCAGCTGGGCGTTCCATTGCCACCTGCT  
TTATCACATGGAAGCCGGAATGATGCGCACGGTGAGGGTCGACGAATGA

>gi\_188574270\_Xanthomonas oryzae pv. oryzae PXO99A chromosome\_33

ATGTCTTTGATTCCCCGTGTTCCGATGCTTCATCCAGCAACGGCCTGAGCCGGCGCCGCTTCGTGCAAG  
GCTTGGCCCTGGGCGGCATTGCCGTTGCCGGCGGCCTGTGGCGGCGCGATGCGCGCGCAGCCACTCCGGC  
CAACACCCCGTACTGCGCGGCAGCAGCCAGTCGCTGCAGATCGGCCGATGCCGGTCGATTTACCCGGC  
CGCACCCGTCCCGCGATCACCGTCAACCAGCGCCTGCCGGCACCGATCCTGCGCTGGCGCGAGGGCGACA  
CAGTGAGCGTGCGCGTGCGCAACGCGCTGACCGACCGCCACCTCGGTGCATTGGCATGGCCTGCTGCT  
GCCGGCCAACATGGATGGCGTGCCCGCATGAGTTTCGACGGCATGCGCCCCGGCCAGGAGTATCACTAC  
CGCTTTGCGCTGCGCCAGTCCGGCACCTACTGGTACCACAGCCATTCGATGTTCCAGGAGCAGGCCGGGC  
TGTATGGCGCCATCGTCATCGACCCGCTGACGCCGCCCGGTATCGGCATGATCGCGAGCATGTGGTGCT  
GCTCTCGGACTGGACAGATCTCGACCCGGCCGCACTGTTCCGCCGTTTAAACAGATGCCAGCCACGAC  
AACGATGCGCAACGCACCGTGGGCGATTTTCTACGCGATGCGCGCGACGACGGCCTGCGCGCATCGCTGG  
CAGACCGCGGCATGTGGGGGCGCATGCGCATGACGCCACCGACCTCTCCGACGTCAACGCCAACACCTA  
CACCTACCTGCTCAATGGCGTGGCGCCCCGCCGGCAACTGGACCGGATTGTTCAAGCCAGGCGAAAAGGTG  
TTGCTGCGTTTCATCAACGGCTCGTCGATGACTTACTTCGACATCCGCATCCCCGGTCTGCGCATGACCG  
TGGTGGCCCGCGATGGGCAGTACGTGCATCCGGTCAGCGTGGACCAACTGCGCATCGCCGCGGCCGAAAC  
CTTCGACGTGATTGTGCAACCGCTCGGCCAGGATGCGTTTACGTTATTCGCTCAGGACATGGGCCGACC  
GGCTTTGCCTGCGGCACACTGGCGGTGCAGCACGGATTGCAGGCGCCGATTCCGGCACTGGATCCGCGCG  
CCATTCTGACCATGCAAGACATCGGCCATGGCGATGGAATGGGGCATGGCGACCACGCGATGCACGGCGA  
CGGTACGACGCAAGGCGACGCGCATGCAGCACACGCGATGGCAATGCCAATGCCGAAATGCACGGGCAT  
GGGGGTGGCAACACGCAGACCAAGACACCGCATCAACCCGCCAGCGAAGACGGCAACCCGTTGATCGACA

TGCGCAGCAATGCCACCGCGCCGCGCCTGGACGACCCTGGCGTGGGCTTGC GCGACAACGGACGTCGCGT  
GCTGTGCTACGCCGATCTGCACAGCGTGTTTCGACGACCCGGATGGCCGCGAGCCCGGTGCGGAGATCGAG  
CTGCATCTGACCGGGCATATGGAAAAATTCGCTGGTCATTTCGATGGCATCGCATTTCGCTCCGCGAGAGC  
CCTTGCGCCTGCAGTACGGCGAGCGGCTGCGCATCGTATTGGTCAACGACACCATGATGCAGCACCCCAT  
CCATCTGCATGGCATGTGGAGCGATCTGGAAGATGCCGACGGCAACTTCAGGTGCGCAAGCACACCATC  
GACATGCCACCCGGCACCCGCCGACCTACCGCGTGCTCGCCGACGCGCTCGGTGCTGGGCGTATCACT  
GCCATCTGCTGTACCACATGGAAGCGGGCATGATGCGCGAAGTGCGGGTGAAGCATGA

>gi\_169794206\_Acinetobacter baumannii AYE chromosome\_34

ATGTCTAGAAAATTAAGTCATGTCCTTTAATAGGAGTCGGATTGTTTTCGTCGACTTGGGTTATGGCAG  
CGGTTAAAGAATATGATTTAACAATTGCTGAACAGACGGTGAATATTACAGGAAAGCCTCTAAAACGAAT  
TACTGTAAATGGTAAGTTTGTGCGCCTCTTCTTGAGTTTGAGGAAGGCGATGATGCCGTTATTCGTGTA  
CACAACAAGTTGAAAAACCAAGATTCTTCTATTTCATTGGCATGGTTTAATTTTACCTGGCATCATGGATG  
GAGTACCGGGGTTCAACCAGTTTGATGGTATTGCACCAAATAAACCTATGAATATAAATTCAAGGTTTCG  
TCAGAATGGAACCTATTGGTATCACTCGCATAGTAAAGGTCAAGAGCAAGATGGTCTATATGGCCCTTTA  
GTCATTTATCCAAAAATAAAGTTCCTTTAACGGCCGGAGAAAAAGCTGATAGAGATTACGTAGTCTTAC  
TCTCTGATTTTCACAATTCTACTAGTGGTCAGATTATGAGTAATCTCAAGAAAGAAGCTGATTACTACCA  
GAATCGAAGAGAAACAGTTTTTGTGTTTTAGGCAGATTAAGAGATGGTTTTAAAGCAACATGGAAA  
GATCGTTCCATGTGGAATCAGATGCGAATGCTTAAGACAGATATGTCTGATGTAACAACTATAACGTTTT  
TAATGAATGGTAAGACTCCAGAACAAAATTGGACTGGAACTTTAAAGCTGGAGAAAAAGTACGTCTCCG  
GTTTATCAATGCCTCGGCAATGTCTTTGTTTCGATGTAAGAATTCCTAATCTGAAAATGACAGTAGTCAGC  
GCGGATGGACAGCCAGTCAAACCCGTGCCAGTGGATGAGTTCGGATAGGAACAGCGGAGACTTACGATG  
TTATCGTAGAACCGAAACAGGCAAATTATCAGATTGAAGCTGAATCTATTGACCGAAGTGTTTTTCTAT  
CGGTACATTACATGACGAAAATACTTCACCTGTAAAAAGTATTGTCATGCCGACACCTCGTCCCCGTGCT  
TACTGACAATGGAAGATATGGGAATGAATCATGACATGTCTTCAATGAAAGGTATGGACCATGACATGT  
CTTCAATGAAAGGTATGGATCATGACATGTCTTCAATGAAGGGTATGGATCATGACATGTCTTCAATGAA  
AGGTATGGATCATGACATGTCTTCAATGAAGGGTATGGATCATGACATGTCTTCGATGAAAGGTATGGAT  
CATGACATGTCTTCGATGAAAGGTATGGATCATGACATGTCTTCAATGAAAGGTATGGATCATGACATGT

CTTCAATGAAAGGTATGGACCATGACATGTCTTCGATGAAAGGTATGGATCATGACATGTCTTCGATGAA  
AGGTATGGATCATGACATGTCTTCAATGAAAGGTATGGATCATGACATGTCTTCAATGAAAGGTATGGAC  
CATGACATGTCTTCGATGAAAGGTATGGACCATGACATGTCTTCAATGAAAGGTATGGATCATGACATGT  
CTTCAAAAACAATGAGCTCTTCTGGATCAGATGAAGTGGTTTACGGATGGGCGAATGCCTCAACCCCAGC  
TGGACTAAAAGCACTTCAATATAGTGATCTACAATCTTTAACCCCTCAAAAAGATACCCGTGCTCCAGAA  
CGTGAAATTGAAATCCGCTTAGGTGGAAATATGGAGCGCTATATTTGGACAATTAATGGTAAGAAGTTTA  
ATGAAACTGAACCATTTAAAGTGAATATGGTGAGCGTATACGCTTGAAATTTGTTAACGATAGTATGAT  
GGCTCATCCGATGCATTTACACGGCATGTTTATGCAACTGGAAAATGGCCAAGATCCAAGTAATATGCCG  
AATAAACATACGGTTATTGTTCCACCAGGTAAGACAGTTACAACCTTTATTAACGGCTGATGAGTTAGGTG  
AATGGGCTATTCATTGCCATTTGCTCTATCACATGTCTGCTGGAATGATGAATAAACTTATTGTGGCAA  
TGTCGATAGTAATAGTACTGATTCGAAAGATGTTGTTGCTCAACCTAATACTAATGATAAGGGGGTAAAT  
CAACATGCGCACCACTAA

>gi\_16120353\_Yersinia pestis CO92 chromosome\_35

ATGTTGCAAACCACACTGCTCGCCTTACAAGGACTTTCTTGTATGAATTGTGCTCAACGCGTTAAAGCCG  
CGTTGGAAAGCCGTGAGGATGTTACCATGCTGAAGTGAATGTTCACTACGCTAAAGTGACTGGTGAAGC  
CGACACTCATGCACTCATTGAAACGATCAAACAGACCGGTTATCAGGCTACAGAAGCCCAAACGCCGGAC  
GTTGAATTACACCTATCAGGATTGAGCTGCGGGCATTGCACTGAGACCGTCCGTAAAGCGCTGGAAGCGG  
TTTCGGGGTTATTTCTGCCGATGTAACCCTCGAGAGTGCCAACGTGTACGGCAAGGCCGATATACAGAC  
ATTGATTGCCGAGTGGAACAGGCTGGCTATCACGCCACACAGCAAGGTATCGACTCCCCAAAACTGAG  
CCGCTGACACACTCAGCCCAATCTCAGCCGGAATCTCTGGCAGCGGCCCGAATACAGTTCCGGCAACAA  
ACGTGGCTTTAGCCACAAGTACGGTTTCTGATACAAATACCGTTTTACCTACAAATACCGCTTTACCTAC  
AAATACAACGTCGACAACCTCAACAGCCGATACGGCGTCAGCCACCAGCACGGCACCGGTGATCAATCCG  
CTGCCAGTGACCGAATCAGTGGCCCAGCCGGCAGCCTCAGAAGGGGAGAGTGTTTCACTATTACTGACGG  
GGATGAGCTGTGCCAGTTGTGTCTCTAAAGTACAAAATGCATTGCAACGTGTTGATGGGGTTCAGGTGGC  
CCGCGTTAATCTGGCTGAGCGCAGTGCATTGGTCACAGGGACCCAAAATAACGAAGCCTTAATCGCTGCG  
GTTAAAAATGCCGGTTACGGCGCGGAAATTATTGAAGACGAAGGGGAGCGACGCGAGCGGCAACAGCAA  
TGTCGCAAGCCAGTATGAAGCGCTTCCAATGGCAAGCGGCATTAGGTCTGTTGTTAGGTATCCCATTGAT

GGCCTGGGGGCTGTTTGGCGGTAGCATGACGCTGACGCCAGAAACCCAAACGCCCTGGCTTATCATCGGG  
ATTATCACGTTGCTGGTAATGATATTTGCGGGTGGTCACTTCTACCGTAATGCGTGGGTGAGCCTGAAAA  
ATGGCAGAGCGACCATGGATACCTTGGTCGCTCTGGGGACAGGTGCGGCCTGGATCTATTCCATCACCGT  
CAATATCTGGCCAGATGTTTTCCCTATGGAGGCTCGTCACCTTTATTACGAAGCCAGTGCCATGATCATT  
GGTTTGATTAACCTTGGTCATGCGATGGAACAACGTGCCAGACAGCGCTCATCTAATGCGCTCGAACGCC  
TGTTAGATTTGGCCCCACCAACGGCAAAGTTAGTGACCGATGACGGCGAGAAGGTGATCCCCTGGCTGA  
TGTCCAAGTGGGGATGATCCTACGCCTGACTACTGGCGATCGCGTACCGGTTGACGGCGAGATTGTGCAG  
GGCGAAGTGTGGATGGATGAAGCGATGCTGACTGGTGAGCCGATCCCACAACAGAAATCAGTCGGTGATA  
TTGTCCACGCGGGGACACAAGTACAAGATGGAACCGTACAATTCGGGCTAGCGCTATCGGTAGCCAAAC  
GACCTTGGCGCGGATTATCAAAGTAGTCCGTGAGGCACAAAGCAGTAAACCGGAAATCGGCAAATTGGCA  
GACCGTATCTCTGCGGTATTCGTCCCAACGGTGGTGGTCATTGCCATTGTCGCTGGCCTGATTTGGTATT  
TCTTCGGCCCAACCCAGTTGGTCTATACCCTGGTGGTGGCCACCACGGTGTTAATTATCGCCTGCC  
TTGTGCTTTGGGCTTAGCGACACCGATGTCGATTATCTCTGGCGTCGCGCCGGCCGCTGAATTTGGTGTA  
TTGGTTCGAGATGCAGATGCATTGCAGCAAGCCAGTAACCTCGATACGTTAGTGTTGATAAAACCGGCA  
CACTGACTGAGGGGCACCCGAGGTAGTGGCAATCCATACCTTTAATGGTGTGAGTGAGCAACAGGCTTT  
GGGCTGGGCGGCAGCATTGAAACGGGATCAAATCACCCGCTGGCGCGCGCTATCTTACAACGTGCTGAA  
GGGCTGACATTGGCCACCGCCAGCCAATTTGTCGATTGCGCGGTTTGGGGGTCAGTGGTGAAGTTGACG  
GCATTCCACTGCTCCTTGGCAATAATCGGCTACTGGAAGAGCAACAGATTGATACCCGCGAGCTGCAATC  
ATTGATACAGCAACAAGCGGAAAGTGGCGCAACACCGGTTATTCTGACCGCCAATGGTAAGCCCGCCGCA  
CTGTTATCGATCCGTGATCCATTGCGCGAAGACAGTATCGGCGCATTACAGCGGCTGCATCAATTGGGCT  
ATAGTCTGGTGTGATTGACCGGTGACAACCTATTACCGCCAATGCCATTGCGAAAGAAGCCGGTATTGA  
TCGTGTGATCGCGGGCGTTCTGCCAGATGGCAAAGCCGATGCTATCAAGCAACTGCAAGCGGCCGGGCAT  
AAAGTGGCGATGATTGGTGTGATGGCATTACGATGCTCCTGCATTAGCACAAGCGGATGTCGGGATTGCCA  
TGGGGGGCGGCAGTGATATCGCGATTGAAACCGCGGCGATTACCCTTATGCGTCACAGTTTGTACGGTGT  
TGTCGATGCGGTAGAACTTTCAAAGCAACATTACGTAACATGAAGCAAAACCTGTTGGGCGCGTTCTTC  
TACAATGCGCTGGGCATTCCCATTGCCGCGAGGATTTTATATCCCTTACCGGTACATTGCTCAGCCGG  
TCGTGCGCGGAGCGGCAATGGCGTTGTCGTCCATTACGGTCGTCAGTAACGCTAACCGTTTACTGCGCTT

TAAGCCTAAACAGTAA

>gi\_332139403\_Pantoea ananatis LMG 20103 chromosome\_36

ATGTCAAACACGATTGTTCTGGCGCTGGACGGATTGTCTGCGGCCACTGCGTAAAACGCGTCAAAGATG  
CGCTCGAACAGCGCGACGATGTGCGAGCTGGCTGAGGTTACTCAACAGGAAGCCAGCGTGTGAGGCCGTGC  
AGACGCTACCGCGCTGATCGCTACCGTTGAACAAGCGGGCTATCATGCAACATTAAGCTGCGGGTTCC  
AGCCCAAAGCCTGAGCCGTTGACAGCAGCAGAGCCGCCGCCGAGGCGCTGACAACGGAGTCTTCTCCTC  
TTCCGGCAACTGAAAATCAGCCCCTCACGTGCTGTTAATCGACGGGATGAGCTGCGCCAGCTGTGTCAG  
CCGGGTTGAGAAAGCCCTTGAGCAGGTAAGTGGTGTGCAACAGGCCCGCGTGAATCTGGCCGAACGCAGC  
GCGCTGGTGTGATGGGCAATGTGGCACCCCATCTGCTGGTCGCCGCCGTGGATGCGGCCGGCTATGGGGCGG  
AAGTGGTGAAGACGAACAGCAACGACGTGAAAAGCAGCAGCGCAGCGCCCGACGCGCCATGCGACGTTT  
TAGCTGGCAGGCGGGACTTGCACTGCTGTTTGGCGTGCCGTTAATGATCTGGGGCATGCTGGGGCGACAAC  
ATGATGCTCACCGAGGACAATCATAACCTGGCTGGTGTGGGCACGGTTACGCTGTTGGTGTGATGGTCG  
CCACGGGCGGTCACTTCTACCGCAGTGCCTGGCGCAGCCTGCTCAACCGCAGCGCGACAATGGATACCTT  
AGTCTCGCTGGGCACCGCCCGCCTGGATCTACTCCTTAGCGTGGTGAATTTGGCCGGCGTTCTTCCCG  
CTGCAGGCGCGTCATCTCTACTTCGAAGCCAGCGTAATGATTCTCGGCCTGATCAATCTGGGCCATGCGC  
TTGAACAACGCGCGCGTCAGCGTTCTCGCGAGCCCTGGAACACCTGCTCGATCTGACGCCGGAACAGGC  
AAGAGTCGTAACGGAACAGGGTGAACCTCAATGCCGTTAGCGCGGTACAGCCCGCATGATCCTGCGG  
CTGGTCGCGGGCGATCGCGTGCCGTCGATGGCGAAGTCCAGGACGGTGAAGCCTGGTGTGATGAGGCCA  
TGCTGACCGGTGAGGCGGTGCCGCAAAGCAAACGCAGGGCGATCGTCTGTTTGCCGGCACCCCTGGTGCA  
GGACGGGACAGTACGCTTTATTGCCCGCGGACCGGTGGCAATACGACGCTGGCGCGCATCATTAGTTA  
GTCCGTAAAGCCCAGAGCAGTAAGCCAGATGTGGGTCGCTGCGCGATCGTATTTCTGCCATGTTTGTGC  
CGGTGGTGGTGCTTATCGCCCTGATAAGCGCCGAGTCTGGTATACCGCCGGTCCGGCGCCTCAGATTGC  
CTACGCGCTGGTGGTGGCCACCACAGTGCTGATTATTGCCTGCCCTGCGCGCTGGGCCTGGCCACGCCC  
ATGTCGATTATCGCCGGAACCGGCCGCGCCCGCAATACGGCGTGCTGGTACGCGATGCCGATGCACTGC  
AGCGCGCCAGCCGATCGATACGCTGGTGTGTTGATAAAACCGGCACGCTGACAAGGGGCACACCGCAGGT  
GACCGAGGTGATGAGCTGGAACGGCAGCAGCGCGATTGGTCTGTCTTCGGCGGGCGCTGGAACAG  
ACATCGGGTCACCCACTGGCGAAAGCGATCCTGGCGGAAGCGGGTACCGCAGCAACGCCCGCGATTGCGC



AATTCGTACAATACGCGGCAAAGGCGTAAGCGGCATACTCAATGGCAGACAGCTGTTACTGGGTAATGT  
CAGTCTGTTACACGATTACGGCGTGGATTGCCAACCGGCGCGGGCTGAAATTGACAGGCTCACCCGGCAA  
GGGGCAACCCCGGTATTACTGGCACAGGATGGACAGCTTACCGGTCTGATTGGCTTGCGGGATACGCTGC  
GCCCCGAAGCGAAAGCAGCACTGCAGCGGCTGCATGCAGCGGGTTACCGACTGGTTATGCTGACCGGTGA  
TCATGAAAATACGGCCCCGGCTGTTGCGGATGAAGTCGGGATTGATGAGGTGATTGCAGGCGTACTGCC  
GAAGGTAAAGCCGATGCGATAAGCCAACACTACAGCAGCAAGGAAGGCAGGTTGCCATGGTGGGCGATGGTA  
TCAATGATGCTCCTGCACTGGCGCAGGCTGATGTCGGTATTGCGATGGGCGGCGGCAGCGATGTGGCGGT  
AGAAACCGCAGCGATTACGCTCATGCGGGCCGATCTGCATGGCGTGGTGGATGCCTTAAAGATTGCCTCC  
GCCACCCTGGGCAATATCCGGCAGAATCTGTTTGGCGGTTTATTTACAACGTTATCGGTATTCCGCTGG  
CGGCAGGCGTGCTCTTTCCTTTTACCGGCCTGTTGCTTAGCCCGGTTTTTGGCGGTGCCGCCATGGCGCT  
GTCGTCAATAACCGTGGTGAGCAATGCTAACCGCCTGTTGCGCTATAAGCCACGCGTTAG

>gi\_172087630\_Vibrio fischeri ES114 chromosome\_37

ATGAGTCAAGAATTCAATCTGCCTTTAGCGGGATTAATTGTGGTCGTTGTATTGCGAAAATAGAAAAAG  
CATTTGCAGACAATCCGCATGTACAGCAATACTCGGTAATAACCGGATACAAAGCTAACCCTACTCT  
CTCTTATCAAGAGGTGGTTAAATTAATCACAGAGCTTGGATATTCCGTCCTAAAGCACAAACATGCTACT  
CTTTATTTGTCTGGATTAAATTGTGGTAAGTGCCTCAATAAAACCAAAGAAGCGTTAAGTGGTTTATCAC  
ATTCCAGTATTACGTCTATTTCAACAACACAATTGAAATTAGAAACCACTCACTCGCAACAACATATTAT  
CGAACTCATTGAGTCTATTGGCTTTCATGCAAGTAACCAGTCACCTGTATCTGATAATAAAGAGAATCTA  
TCTCCTCAGTCTGATAATCCCAAACAGACAATACCAACTATTCATCAGAAAAACGACACAATTAATAT  
TGTCAGGAATGACATGTGCGAGTTGCGTATCTTCTGTTGAAAAAATCATTGCGCAAATAAAAACGTACA  
CTCTGTGACGGTTAATCTTGCTGAACGCACCGCGCTCGTTCATGGCGATATTGATGTACCAACATTAATC  
AAAAGCATTGAAGATGGGGTTATGGCGCAGAACTAAGCGTAAGTGAAGAACAGCGCAGAGTACGACAAA  
AAGAGCAATTTCTAAAAACAACCGCTAACATAAAAGAAATACTATTTTATCACTAAGCATCGGTGCTCC  
GCTCATGTTGTGGGGCGTTTTCGGTGGCAATATGCAAATATCAAATACTCACGACCAAATCGCTTGGGGA  
GTAATTGGAGTTATTTGTTTAGGGTTATTACTGACTGCTGGTCGACACTTTTTTGTGAATGCATGGAAAG  
CCTTACTACCATAGAGCAACAATGGATACCTTAGTTGCATTAGGCACAGGCTCTGCTTGGCTATATTC  
CATGGCACTAGTTCCTTTTCTGAATTCTCCAGAACAAGCTCGTCATGTGTATTTTGAAGCAACAGCA

ATGATCTTAGGCTTAATTACACTGGGTAACCTCATTGAAACTAAAGCCAGAAATCGCACGTCAAATGCCA  
TTGAAAAACTGATCAACTTACAACCACAAACGGCTACCGTTATTATTGATAGCCAAGAGGTTACCTTGCC  
TGTCGCTCAAGTTGTTGAAGGAATGGTAATTAATAATTAACCCGGTGAAAAAATCCCGTTGATGGCACT  
ATCTTGAGTGGTGAGAGCTATCTTGATGAAGCCATGTTAACTGGAGAGCCAATACCGAGCTTAAAATCCT  
TAGGTAATGCCGTACATGCCGGTACCATCAATCAACAAGGAAGCTTACCTTTAAAGCGACGAAAGTTGG  
TGAGCACACCATGCTCGCTCGTATTATTACTATGGTACGAAATGCACAGAGCAGTAAACCTAAATTAGCT  
AAATTGGCAGATAAAATATCATCAATCTTTGTTCCGAGCGTTATGATTATCGCGATTCTATCCGCTCTTA  
TTTGGTATAACTTTGGTCCAGAGCCAACATCAAGTTACATGTTAGTTGTCGCCACTACAGTTCTAATTAT  
TGCTTGCCTTGCGCCCTTGATTAGCAACGCCTATGTCGGTAACCGTAGGAATTGGTAAAGCAGCTGAA  
TTTGGTGCATTAATTAAGATGCTGACGTACTTCAAAGTCAAGCACCATCGATACGGTTGTTGTAGATA  
AAACAGGAACATTAACGGAAGGGAAACCAAGGGTAAATCACGTCACCCTTTTCAACCAATACGATGAAAA  
AGAAGTAATTTCACTCGCAGCAGCAGTCGAAACTCATTCTGAGCATCCATTGGCGTTAGCGGTTGTGAAT  
TATTTAAATGACAACCATTGGATACCTCTTACTAGTACAAATTTTACTGCCGAACTGGGCCTAGGTGCAT  
CAGCGATAGTAAATGGTAATCTCATATTTATTGGTAACCATCGTTACCTTACTAAGAACAACATACCAAC  
TCCTGATGTATCTATTTACCATCAGCTACGCCTTATATGTGGCTAATGAGCAAGAGTGTATCGGGGTT  
ATTCAGGTTAGTGATGCCATTGCTTAGATTCCAAAGCTGCTATCAAGCAATTTAACCAACTTGGTATTG  
ATGTTGTCATGTTAACTGGCGATCGTAAAGAGACTGCAGAGCACGTAGCAAAAAGAACTAGGGATCAATCA  
AATCATTGCTGGAGTATTACCGGATGGTAAAGCGCAAGCAATCCAAGAAGTCAAAAAACAAGGCAAAAAA  
GTGGCCATGATAGGTGATGGTATTAATGATGCCCCAGCACTAGCACAAGCTGAAGTCGGTATTGCAATGG  
GCAATGGCAGCGATGTTGCAATTGAAAGTGACATTTAACGTTAATGAATCACTCTTTATTAAGTGCAGT  
CAATGCCATTACATTATCCAAAGCAACCATGAAAAATATGAAGCAAAATCTATTTGGTGCATTTATATAC  
AATACCATTGGGATCCCTGTTGCGGCAGGCATTTTATTCCATTTACTGGCATGCTACTAAGTCCAGTCG  
TTGCAGGCGCAGCAATGGCACTTTTCTATAACGGTCGTCACCAATGCAAACCGGTTACGACTTTTTAC  
TCCCCAACCTCAACAAAAATAA

>gi\_45439865\_Yersinia pestis biovar Microtus str. 91001 chromosome\_38

ATGTTGCAAACCACTGCTCGCCTTACAAGGACTTTCTTGTATGAATTGTGCTCAACGCGTTAAAGCCG  
CGTTGGAAAGCCGTGAGGATGTTACCATGCTGAAGTGAATGTTCACTACGCTAAAGTGAAGTGGTGAAGC

CGACACTCATGCACTCATTGAAACGATCAAACAGACCGGTTATCAGGCTACAGAAGCCCAAACGCCGGAC  
GTTGAATTACACCTATCAGGATTGAGCTGCGGGCATTGCACTGAGACCGTCCGTAAAGCGCTGGAAGCGG  
TTTCGGGGGTTATTTCTGCCGATGTAACCCTCGAGAGTGCCAACGTGTACGGCAAGGCCGATATACAGAC  
ATTGATTGCCGCAGTGGAACAGGCTGGCTATCACGCCACACAGCAAGGTATCGACTCCCCAAAACTGAG  
CCGCTGACACACTCAGCCCAATCTCAGCCGGAATCTCTGGCAGCGGCCCGAATACAGTTCCGGCAACAA  
ACGTGGCTTTAGCCACAAGTACGGTTTCTGATACAAATACCGTTTTACCTACAAATACCGCTTTACCTAC  
AAATACAACGTGACAACCTCAACAGCCGATACGGCGTCAGCCACCAGCACGGCACCGGTGATCAATCCG  
CTGCCAGTGACCGAATCAGTGGCCCAGCCGGCAGCCTCAGAAGGGGAGAGTGTTTCAGCTATTACTGACGG  
GGATGAGCTGTGCCAGTTGTGTCTCTAAAGTACAAAATGCATTGCAACGTGTTGATGGGGTTCAGGTGGC  
CCGCGTTAATCTGGCTGAGCGCAGTGCATTGGTCACAGGGACCCAAAATAACGAAGCCTTAATCGCTGCG  
GTTAAAAATGCCGGTTACGGCGCGGAAATTATTGAAGACGAAGGGGAGCGACGCGAGCGGCAACAGCAAA  
TGTCGCAAGCCAGTATGAAGCGCTTCCAATGGCAAGCGGCATTAGGTCTGTTGTTAGGTATCCCATTGAT  
GGCCTGGGGGCTGTTTGGCGGTAGCATGACGCTGACGCCAGAAACCCAAACGCCCTGGCTTATCATCGGG  
ATTATCACGTTGCTGGTAATGATATTTGCGGGTGGTCACTTCTACCGTAATGCGTGGGTGAGCCTGAAAA  
ATGGCAGTGCAGCCATGGATACCTTGGTCGCTCTGGGGACAGGTGCGGCCTGGATCTATTCCATCACCGT  
CAATATCTGGCCAGATGTTTTCCCTATGGAGGCTCGTCACCTTTATTACGAAGCCAGTGCCATGATCATT  
GGTTTGATTAACCTTGGTCATGCGATGGAACAACGTGCCAGACAGCGCTCATCTAATGCGCTCGAACGCC  
TGTTAGATTTGGCCCCACCAACGGCAAAGTTAGTGACCGATGACGGCGAGAAGGTGATCCCGCTGGCTGA  
TGTCCTCAACTGGGGATGATCCTACGCCTGACTACTGGCGATCGCGTACCGGTTGACGGCGAGATTGTGCAG  
GGCGAAGTGTGGATGGATGAAGCGATGCTGACTGGTGAGCCGATCCCACAACAGAAATCAGTCGGTGATA  
TTGTCCACGCGGGGACACAAGTACAAGATGGAACCGTACAATTTGGGGCTAGCGCTATCGGTAGCCAAAC  
GACCTTGGCGCGGATTATCAAACCTAGTCCGTCAGGCACAAAGCAGTAAACCGGAAATCGGCAAATTGGCA  
GACCGTATCTCTGCGGTATTCGTCCCAACGGTGGTGGTCATTGCCATTGTCGCTGGCCTGATTTGGTATT  
TCTTCGGCCCCACAACCCAGTTGGTCTATACCCTGGTGGTGGCCACCACGGTGTTAATTATCGCCTGCCC  
TTGTGCTTTGGGCTTAGCGACACCGATGTCGATTATCTCTGGCGTCGGCCGGGCGCTGAATTTGGTGTGTA  
TTGGTTCGAGATGCAGATGCATTGCAGCAAGCCAGTAACCTCGATACGTTAGTGTTTCGATAAAAACCGGCA  
CACTGACTGAGGGGCACCCGAGGTAGTGGCAATCCATACCTTTAATGGTGTGAGTGCAGCAACAGGCTTT

GGGCTGGGCGGCAGCATTGGAACGGGATCAAATCACCCGCTGGCGCGGCTATCTTACAACGTGCTGAA  
GGGCTGACATTGGCCACCGCCAGCCAATTTGTAACATTGCGCGGTTTGGGGGTGAGTGGTGAAGTTGACG  
GCATTCCACTGCTCCTTGGCAATAATCGGCTACTGGAAGAGCAACAGATTGATACCCGCGAGCTGCAATC  
ATTGATACAGCAACAAGCGGAAAGTGGCGCAACACCGGTTATTCTGACCGCCAATGGTAAGCCCGCCGCA  
CTGTTATCGATCCGTGATCCATTGCGCGAAGACAGTATCGGCGCATTACAGCGGCTGCATCAATTGGGCT  
ATAGTCTGGTGTGATGTTGACCGGTGACAACCTATTACCGCCAATGCCATTGCGAAAGAAGCCGGTATTGA  
TCGTGTGATCGCGGGCGTTCTGCCAGATGGCAAAGCCGATGCTATCAAGCAACTGCAAGCGGCCGGGCAT  
AAAGTGGCGATGATTGGTGTGATGGCATTAAACGATGCTCCTGCATTAGCACAAGCGGATGTCGGGATTGCCA  
TGGGGGGCGGCAGTGATATCGCGATTGAAACCGCGGCGATTACCCTTATGCGTCACAGTTTGTACGGTGT  
TGTCGATGCGGTAGAACTTTCAAAGCAACATTACGTAACATGAAGCAAAACCTGTTGGGCGCGTTCTTC  
TACAATGCGCTGGGCATTCCCATTGCCGCAGGGATTTTATATCCCTTACCGGTACATTGCTCAGCCCGG  
TCGTGCGCCGAGCGGCAATGGCGTTGTCGTCCATTACGGTCGTACGTAACGCTAACCGTTTACTGCGCTT  
TAAGCCTAAACAGTAA

>gi\_156932229\_Cronobacter sakazakii ATCC BAA-894 chromosome\_39

ATGTCAAACACCATAGAACTGGCCCTGGACGGGCTTTCCTGCGGACACTGCGTAAAACGGGTGAAAGAGA  
GCCTGGAGCAGCGCCCGGACGTTGAACGCGCGGATGTCACGATTGAACATGCCAGCGTCACCACTACCGC  
GCCTGCGGACGCCCTGATTGAGACGGTGAACAGGCCGTTACGACGCGACCCTCGCACACCCAAAGGCT  
AACCCGCTGACAGAGTCATCAACCCCGTCGGAAGCACTGACAGCGGCGCAACCTGAGCTTCCGGCAGCGG  
ATAACGCCGACGATGACGACAGCCGACAGCTGCTTATCAACGGCATGAGCTGCGCCAGTTGCGTGAGCCG  
CGTTCAGAACGCCCTGCAAGGGGTGGCGGGCGTCACGCAGGCACGGGTGAATCTGGCGGAGCGCACGGCG  
CTGGTGATGGGCCATGCCTCCGCCGCTGATTTAATCGCGCGGTTGAAAAAGCGGGCTACGGCGCAGAGG  
CTATCGATGACGACGCCGAACGCCGCGAGCGCCAGCAGCAGACCGCGCAGGCGGCCATGAAACGCTTTCG  
CTGGCAGGCGGCGCTCGCGCTCGCCGTCGGCATTCCGGTGTGATGATCTGGGGCATGTTCCGGCGACAACATG  
ATGGTCACCGACGCCAACCGTTTCGCTCTGGCTGGTCATTGGGTTTATCACGCTCGGCGTGATGGTTTTCG  
CGGGCGGTCATTTTTATACCAGCGCCTGGAAAAGCCTGCGCAACCGCAGCGCGACAATGGATACGCTGGT  
GGCGCTCGGCACCGGCGCGGCCTGGCTCTACTCCATGAGCGTCAACCTCTGGCCGAGCATTTCGGATG  
GAAGCGCGTCATCTCTATTACGAAGCCAGCGCCATGATTATTGGTCTGATTAATCTTGGTCATATGCTGG

AGGCGCGCGCCCGCCAGCGTTCATCGAAAAGCGCTGGAACGCCTGCTGGATCTGACGCCCGCGTTGCGCG  
CGTTGTCACGCCGGAAGGTGAGAAAAGCGTGCCGCTGGCGGAGGTGACGCCGGGCATGACGCTGCGCCTC  
ACCACCGGCGATCGCGTCCCTGTGGATGGCGACATTACCGACGGCGAAGGCTGGTTTGACGAAGCGATGC  
TGACCGGCGAGCCGGTGCCGACGAAAAAGCGGCGGGTGATGCGATCCACGCGGGCACCGTTGTGCAGGA  
TGGCAGCGTGCTGTTTCGCGCCGCGCGGTGGGCAACCACACCACGCTGTCGCGCATTATTCGCATGGTG  
CGCCAGGCGCAGAGCAGCAAGCCGGAATCGGCAAGCTGGCCGACCGCATCTCCGCGGTTTTTTGTTCCGG  
TCGTGGTGCTGATTGCGCTGTTACGCGGCGCGGTCTGGTATTTGCGAGGCCCGGCCCGCAGATCGTCTA  
TACGCTGGTGATTGTCACCACGGTGCTGATTATCGCTGCCCTGCGCGCTGGCCTTGCCACGCCGATG  
TCGATTATCTCTGGCGTCGGGCGCGCGGAGTTTGGCGTACTGGTGCGTGACGCCGACGCGCTGCAAC  
GCGCAAGCGACGTCGACACGCTGGTGTGTTGACAAAACCGGCACGTTAACCGAAGGCAAACCGCAGGTGGC  
GGCCATCGCCACCACGGGCGACATCACCGAAGCGGACGCGCTGCGCCTCGCCGCCGCGCTGGAGCAAGGC  
TCCAGCCACCCGCTCGCGCGCGCCATTATCGAACGTGCCGGCGGCGCAGACCTTCCCGCCGTCAGTGTT  
TTCGCACGCTGCGCGGGCTGGGCGTTAGCGGTGAGGCGCAGGGCAAACGCTGCTGCTCGGTAATCAGGC  
GTTGCTGGAGGAAAACGGTATTCCGACCGACGCGCTGCGCGATGAGGCGCAGCGTCAGGCAAGCCTCGGC  
GCCACGCCGGTGCTGCTGGCGGTGGACGGTACGCTGGCGGCTCTCTTCGCCATTGCGGACCCGCTGCGTG  
AAGACAGCGCCGATGCACTGGCGCGCCTGCACCGCGAAGGCTACCGGCTGGTGATGCTGACCGGCGACAA  
TGCCGTACCGCGAACGCCATCGCCCGGAGGCGGGCATTGATGAAGTGATTGCAGGCGTCCTGCCGGAT  
GGCAAAGCACAGGCGATTAGAAAGCTCAGCAGGCGGGCCGCAAAGTGGCGATGATTGGCGATGGCATT  
ACGACGCCCCGGCGCTGGCCCAGGCGGAAGTGGGGATCGCGATGGGCGGCGGCAGCGATGTGGCTATTGA  
AACCGCCGCGATTACCCTGATGCGCCACAGCCTGACGGGAGTCGCCGACGCGATGGCGATTTCAAAGCG  
ACGCTTGGAATATGAAACAGAACCTGCTCGGTGCCTTTATCTATAACGCACTCGGCATTCCCGTGGCGG  
CAGGCGTGCTGTGGCCGCTGACCGGCACCCTGCTGAACCCGGTGGTCGCAGGCGCGGCGATGGCGCTCTC  
ATCGATTACCGTCGTCAGTAACGCCAACCGGCTGCTGCGGTTTAAACCGAAAAAATAA

>gi\_82542618\_Shigella boydii Sb227 chromosome\_40

ATGTCACAACTATCGACCTGACCCTGGACGGCCTGTCTGCGGTCACTGCGTTAAACGCGTGAAAGAAA  
GTCTCGAACAGCGCCCGGATGTAGAACAAGCGGATGTGTCTATCACTGAAGCGCACGTTACCGGGACTGC  
CAGTGCAGAACAGCTGATCGAAACCATCAAACAAGCGGGTTATGACGCATCTGTAAGCCACCCAAAGGCT

AAACCGCTGGCGGAGTCATCAATCCCGTCGGAAGCACTGACAGCGGTTTCTGAGGCGCTCCGGCAGCGA  
CCGCCGATGACGATGACAGCCAGCAGTTGCTGCTGAGCGGCATGAGCTGCGCCAGCTGTGTACCCGCGT  
ACAAAATGCGCTGCAAAGCGTACCGGGCGTCACTCAGGCACGGGTAAACCTGGCGGAGCGTACTGCGCTG  
GTGATGGGCAGTGCCTCCCCACAAGATTTAGTGCAGGCGGTGGAAAAAGCGGGCTACGGCGCGGAAGCGA  
TTGAAGATGACGCGAAACGCCGCGAGCGCCAGCAGGAAACCGCCGTCGCTACGATGAAGCGCTCCGCTG  
GCAGGCGATTGTGCGACTGGCGGTGGGTATTCCGGTAATGGTCTGGGGGATGATCGGCGATAACATGATG  
GTCACCGCTGACAACCGCAGCCTGTGGTTAGTTATCGGCCTGATAACCCTGGCGGTAATGGTTTTCGCCG  
GCGGGCATTTTTACCGCAGCGCGTGGAAAAGCCTGCTGAACGGTGCAGCGACGATGGATAACGCTGGTGGC  
GCTGGGTACGGGTGTGGCGTGGCTCTATTCGATGAGCGTCAACCTGTGGCCGAGTGGTTCCCGATGGAA  
GCGCGGCATCTTTACTATGAAGCCAGTGCATGATTATCGGTCTGATTAATCTCGGCCATATGCTGGAAG  
CGCGCGCGCGTCAGCGTTCTTCTAAGGCGCTGGAGAAATTACTCGATTTAACCCACCGACGGCGCGAGT  
GGTCACCGCAGAGGGTGAAAAAGCGTGCCGCTGGCGGAAGTTCAGCCAGGGATGTTACTGCGCCTGACG  
ACCGGCGATCGCGTGCCGGTAGATGGCGAGATTACCCAGGGCGAAGCATGGCTGGATGAAGCGATGCTGA  
CGGGCGAACCAATCCCGCAGCAAAAAGGCGAAGGCGAAAGCGTCCATGCCGGGACAGTGGTACAGGACGG  
TAGCGTGCTATTTGCGGCCAGTGCAGTTGGCAGCCATACCACGCTGTCAAGGATTATTCGCATGGTGCGC  
CAGGCCCAGAGCAGCAAGCCAGAAATCGGTCAGCTGGCGGATAAAATCTCAGCCGATTTGTGCCGGTAG  
TAGTGGTGATTGCGCTGATCAGTGCAGCAATCTGGTATTTCTTTGGTCCGGCACCGCAGATTGTCTATAC  
CCTGGTGATAGCCACCACGGTGCTGATTATTGCCTGTCCGTGTGCGCTGGGGCTGGCGACGCCAATGTCC  
ATTATTTCCGGCGTCGGGCGGGCGGCTGAGTTTGGCGTGCTGGTGCGGGACGCCGACGCGCTGCAACGCG  
CCAGTACACTCGATACCGTCGTGTTGATAAAACCGGGACGCTGACCGAAGGGAAGCCGAGGTTGTCCG  
AGTAAAAACATTTGCTGATGTTGATGAAGCGCAAGCATTGCGTCTGGCGGCGGCGCTGGAGCAAGGTTCC  
AGCCATCCGCTGGCACGAGCGATCCTCGATAAAGCAGGCGATATGCAGCTGCCGAGGTCAACGGTTTCC  
GCACATTGCGCGGGCTGGGCGTAAGCGGTGAAGCTGAAGGTCATGCGTTATTGCTGGGTAATCCGGCGCT  
GTTAAATGACCAGCAAGTCGATACTAAAGCGATTGAAGCCGATATTTAGCTCAGGCATCGCAAGGAGCA  
ACGCCTGTGCTGCTGGCGATTGACGGGAAAGTAGTAGCCCTGCTGGCTGTACGCGATCCGTTGCGTAGTG  
ATAGCGTGGCGGCGCTGCAACGCCTGCATAAAGCGGGATATCGTCTGGTGATGTTGACCGGGGATAACCC  
AACCACCGCCAATGCGATCGCCAAAGAAGCAGGGATTGATGAGGTAATCGCCGGGGTGCTGCCAGACGGT

AAAGCCGAAGCGATCAAACGTCTGCAAAGTGAAGGACGTCAGGTGGCAATGGTGGGCGACGGCATTAAACG  
ACGCGCCAGCGCTGGCTCAGGCGGATGTCGGTATTGCGATGGGTGGCGGCAGTGATGTTGCCATTGAAAC  
CGCGGCGATTACCCTGATGCGCCATAGCCTGATGGGTGTTGAGATGCGCTCGCGATTTCCCGCGCAACG  
CTGCGCAATATGAAGCAGAACCTGCTCGGTGCGTTTATCTACAACAGCATTGGTATTCCGGTCGCCGCTG  
GTATTTTGTGGCCGTTTACTGGAACACTGCTTAACCCGGTAGTTGCCGGAGCGGCAATGGCGCTCTCGTC  
GATTACCGTAGTGAGTAACGCCAACCCGGTTGCTGCGGTTTAAACCGAAGGAATAA

>gi\_397665626\_Legionella pneumophila\_41

ATGTTACAAAAGGATTTGCGTTGTCTAATAAGGAATTATTGCTTTATTTTTCTTTTTACTGCTTAATT  
CTTCTGCTTTGTTTCCCAGCATGAGCAACATGGTGCCTCAACACAACCGTTACCTTCTCCAAGACTAC  
ATCGTCTCAATCGAAACCTGCACAATACAAAATGAAACAACCTATCGCTAAAAGCCAACCTGTTAGAACA  
GTGAAACCTCTCACTATGACAGGTGGAGCAAAGCGTACGGTTAATTTGGTGGTTGCTTATAAAACGGTGA  
ATTTTGCAGGCAAACCTAAGACGCGCTATTGCTGTTAATGGGCAAATTCAGCACCGACGTTGCATTTTAA  
AGAAGGGGATGATGTCACCATCAATGTGTATAACCATTGGATGAGGGAACGTCCATTATTGGCATGGT  
CTTTTAGTCCCTTGCAAATGGATGGGGTGGACGGGGTGAAGTCAAAAACCAATTCCTCCGGGAGGCGTGT  
TCCATTATCGCTTTAAGCTTCACCAAAGGGGAACCTATTGGTACCACGCCCATGCCAAGTTCAAGAACA  
AGAAGGGTTGTATGGTACTTTTATTATTGATCCACCAATCCTCCAAGCTATCACTACACCAAAGATTAT  
GTGGTGGTCTTATCCGATTGGAGCAACACTCGCGCCGAGCAAGTCTTGCGAATTTAAAAAAGACGGCG  
ACTATTACGGTCTCGATTTCCCTACAACCCTCGCTTATGAAGTTTCTTCATGATTATCGTAAAGCTTC  
TCCTGAAGAGCGTAAAAAATTAATCGCTGATTATAAAATGATGCAACAAATGCGCATGAGTATCTATGAT  
TTAAGTGACGTGGCTTATGATGCCTATTTATTAATGGTCAACCAAATCTCATCCTTGGACTGCCCTG  
TGAAGGTAGGGGATAGGGTGGGACTGCGCTTATTGGCGCAGGAGCAAGCACCATCTATCGTGTTAAAT  
TCCTGATGCCAAAGTGGAGATGGTGACATTCAAGGAAATGATGTGAGCCCTTATCCATTGAGGATTTT  
TGGATTGCACCAGGTGAAACCTATGATATCCTGGTGACCATTCAAAAAACAAGCCTTACATTATTTATG  
CCGAGTCGATTGACACGCTGGGCAAAGCTTATGGGGCCTTAGTGACCCATCCTAATCAAGTCGTCAACTA  
TCAGCACGTGACTCCTTTCCCTGAACCACTTCTGTCAAGAGAAATGATGGCCAACATGATGATGTCT  
ATGAATGGCGGGGGAATGGGTGGAAATCAACAACACGCCTTATGAACAAAAAACATCATCAACGGCGA  
TGAAACCTCCATGACCATGCCTTCGCACTCTCAAGCAATGAGTTCGCAAAGTGCTAATCATTGATGTC

CTCTAAGACTATCCAAAAGAAAATGGACAAGGCATCCAATCATTCCGCTCACACCTCATCAATGAAGTCC  
AAATCCTCATCGACCTCGATGAACAAGAGTATGGACATGCCAGGTATGAATCATGGGGCAATGAGTCAGA  
ATAAGACGTCTAACTCTGCTCAAATGAAATCTGACTCCTCGTCGACCTCAATGAACAAGAGCATGGCCAT  
GCCAGGTATGAATCATGGGGCAATGAGTCAGAGTAAGACGTCTAACTCTGCTCAAATAAAAATCTGACTCT  
TCGTGACCTCAATGAACAAGAGCATGGCCATGCCGGACATGAATCATAGCGCAATGGGCCAGAATAAGA  
CGTCTAACTCTGCTAATGACACGTCTATGAATAGGAACATGAAGTCTGACAGGCCTATGGAGCAGGGCAT  
GTCGATGAATGGCTCCATGAACATGAAGATGCCATTGAGCCGACCATCATAGGCGATAAAAATAGAGCCA  
CCTGATTCGGCAAAAAGCCACCACCTTAGGAACCAAATACCAAGAGTTAAAAGGGGCAGTGAAAACCAATA  
ATCCGAATAAACCAGTCGATGGGATTATTAATAATGGAATTGTTGGCTACATGGACCGTTATATCTGGTT  
TATTAATGGTCTACCGGAATATAAGGCCAAACCGATTTTGATTGAGCCAGGAAAGCGTTATCGGATTATA  
TTTACCAATAATTTCGATGATGCGTCACCCCATGCATATTCACGGCCATTGGTTTATTTTACGCAATGGTC  
ATGGGGCTTACGATCCGTTATTGCATACCATTGAAGTCCCTCCAGGAGCGACTGCCGTTGCCGATTTTGA  
TACTGAAGCCAGCGGTCAATGGTTTTTCCATTGCCACCATCTTCTGCACATGACCGCGGGCATGGCGCGC  
GTATTTCAATACACCACCATCATTGAGATTGCCAACGGCACTCGAAAGCCAGACAATTACGCCTATCAGC  
AAGCCTACATCAATCGGCCGGTCGTACGAGAAGACGAAGTCATGCCACTGGATGCTTCTCTCATCAAACA  
CCCTGCAGGACATCATCAAGGCTTCTATCGTTCAAGCTATATCGAGCTGGGCGAAGACCCTTTTCATAAT  
GCTCAGGAAATGACGTTTAGAGGCCTCTATGGCCCAGATTACAATAAGCTCCAGTTGTATACTGAGGACG  
CTGAAATTTATAAAGGAACCGTTGAAAACGCAGACATCGATGTGTTCTATTGGCATTGATTAGCCAATT  
TTGGGCGGTTAAAGGAGGAGTCAATTATTTTTATCGCCCGGAGGCCCTTATTGGCAACCTGGTATTGGT  
ATTGAAGGGTTAATGCCTTGGTATATTGATACCAACATTAGAACGTATTATCGTGATGGCAGTGTCAAGT  
TTGACATTCAGTTAGCACGGGCTAACCAGCTGACCAATAACTTCTTCTCCTCACAGGAATTCGCAGCAT  
TTTGGCCACTCATACCGTCGTCAAAAACGAGATTGGCAATGGCTTAAACCAAATGCGTTATATCCTGAGA  
CCTTATTATCGTCTTAAGCCAGGACTTAATATTTTTTCAGAGTATGAGCATGATGTAGAGTATGGTGCTC  
TTAAGAGGATTCTTCGAAGTCAGGGAGAGCCTACCACTCAAGATACAATCACGTTAGGAGTTGCTGTTCT  
TTTTTAA

>gi\_110832861\_Alcanivorax borkumensis SK2 chromosome\_42

ATGTCGACGCAAGCGCGCACCCAACTCTGCCATTGCGGGCGCGACCTGCAAAGGATGCAGCCGCACCA



TCACCGCTGCACTGGAAGCACTCACCGCGTGGAGCGTGTGACGGTGGATTTGGAGTCCCAGCAGGTGTC  
CGTCACCGGCACCGCCTCGCACAGTGCCTTCAAGAGGCGCTGGTACAAGCCGGCTACGGCGTAAACCCG  
GATGATGCTCACCATGAACACAATAATCCCGCCGACCATGACAACACCGCCAGTAAGCCGATCGCCCAGG  
AGCCGCAATCAATACAGCTAAATATCAGCGGCGCCACTTGC CGTCCTGCGTGCGCACCATCGAAAGCGC  
CCTGCGTGACACACCCGGGGTTCGACAGTGC GGATATGAATTTGCCGACCGCACCGCTCAGGTGAGCGGC  
TCCGCCAGCACCGCCTCCCTCATTAAAGCGGTAGAAGACGCGGGTTATGGTGCCAGCGAAGCCCGCGAGG  
AGGATAACGGAGAGCAGGAAGCCAAGGAGCGGGCACATTACCACCAGTTGCTGCGGCACATGGGGCTAGG  
GCTTGGGCTGGGCGTGCCACTAATGGCCTGGGGCCTGCTCGGTGGTGACATGATGGTTCGCCCCGGTGAA  
ACCAGCCAATGGGTATGGCTGGGTATCGGCGTTGCCACCCTCGCGGTGCTGGCCACCGCCGGCCGACACT  
TTTTCGTCGGCGCCTGGAAAGCCTTTCGCAACCATAACGCCAACATGGACACCCTGATCGCACTGGGCAC  
CGGTGCCGCCTGGCTGTATTCCATGGTGGTGGTATTACTGCCCGGCGCCCTGCCGGAAGCCGCCGCCAT  
GTGTATTTTGAGGCCAGCGCCATGATTATCGGCCTCATCAATCTTGGCCAGGCACTGGAAGTTCGCGCCC  
GCGGCAAGACCAGCGCCGCGGTAAAACGGTTGCTGGATTTGGGCGCCAAAACCTGCACGGGTCATCCGCGA  
TGCGGAGGAACAGGATATCCCGTGGAGCAAGTTCAGGCCGGCGATCAATTGCGGGTTCGCCCTGGCGAA  
AAAATTGCTGTGGACGGCACCGTGGAGAAGGCGAAAGCCGCATTGATGAATCCATGCTCACCGGTGAAC  
CCATGCCGGTGAATAAAGCCCCTGGCGATAAGGTCAGCGCCGGCACACTCAACGAAGCCGGCACGCTACT  
TTATACCGCCACCGCCGTCGGCAAAGACACCGCCCTTTCACACATCGTCGCACTGGTAAAAAAGCCCAA  
GGCAGCAAGCCACCCATCGGGCGACTTGCCGATCAGGTGTCGGCATTTTTGTCCCACCATTATGCTGA  
TTGCCATCGCGGCGGCACTGGTGTGGTTCAACGTGGGCCCCGAACCGCGGCTAACCATATGCTGATCAG  
CGCCACCACTGTATTGATTATCGCCTGCCCTGCGCACTGGGCCTGGCCACGCCCATGTCGGTGATGGTG  
GGCGTCGGCAAGGCCCGCCAATACGGCATTCTGATTCGCCAGGGCGAAGCGCTACAACTAGCAGCCAGC  
TGGACACCATTGTCCTCGACAAAACCGGCACCATCACCGAAGGCAAACCTGCCGTCACTGATATCGTCTG  
CAATGAGGGCCAGCAAGAAGACACCGTGCTAACCTTGCCGCCAGCGTGGAAAGCGGGTCGGAGCACCCG  
CTGGCCACGGCGATTCTCAACGAGAGCAAGCAGCGAGAGCTATCACTGGATAGCGCCAGTGAATTCCAGG  
CTTTAAACGGCAAGGGGGTTACCGCCACCATCCAGGGCAAACCTATCGACTAGGAAACCGCCGCTGGCT  
AGAAAGCGAAGGGGTAAACATCAACCTCGATAGCACCTCTCTACCGACAAGGGCGTCACGCCGCTGTTT  
TTGTCTGAAGCGAACCCCTGCTCGGCATCATCGGCGTCCGGATCGTATCAAGGACGATTCCAAAGCCG

CCATCGCCCGCCTGAAAGATCAGGGATTAAGGTCATCATGATTACCGGCGACATTGCCGCCAGCGCCAA  
CGCCATTGCCGAACAAGCCGGGGTGGATGAAGTGATGGCTGAAGTGCTACCGGAAGACAAGGCGAAAAAA  
ATCCAGGCATTGCAGAGTGAAGGGCGCACCGTGGCCATGGTCGGTGATGGCATCAACGACGCCCCCGCTC  
TCGCCAGGCCGATGTGGGCTTTGCTATTGGCACCGGCACCGACGTAGCCATCGAATCCGCGGCCATCAC  
CTTGATGGGAGGCTCGCTACACGGCGTTCCCGATGCCATGGCGATTTCTTCTGCCACAGTCCGCAACATT  
AAACAAAATCTGTTTGGTGCCTTTGTGTATAACAGCCTGGGCGTACCAGTGGCCGCCGGCATCCTCTATC  
CACTCACGGGCAATCTGCTTAGCCCTGTGATCGCCGGGGCCGCGATGTCGCTCAGCTCGGTTACCGTCGT  
CACCAACGCCAACCGATTGCGGTTTTTCAAACCCAAACACCATCAGGGAACAAGCGCATGA

>gi\_336246508\_Enterobacter aerogenes KCTC 2190 chromosome\_43

ATGTCTAACTATCGACCTGACGCTTGATGGCCTCTCCTGCGGCCACTGCGTTAAACGCGTGAAAGAGA  
GCCTCGAACAACTGCCGACGTTGAACAGGCTGATGTAACCGTTACCGAAGCCCACGTACGGGTAGCGC  
CAGCGCTGAAGCCCTGATTGAGACCATCAAACAAGCCGGATACGGCGCGGAGCTCAGCCACCCAAAGGCT  
AAACCGCTGGCAGAATCATCAATCCCGTCGGAAGCACTGACAGCGGCCACTCCTGAGCTTCCGGCAGCCC  
ATGACGAGGATGACAGTCAACAGCTGCTGATCAACGGCATGAGCTGCGCCAGCTGCGTTTCCCGGGTACA  
AAACGCGCTTGCCGCGGTGCCGGGAGTCTCACAGGCGCGGGTAAACCTGGCGGAACGCACGGCGCTGGTG  
ATGGGCAGTGCCTCCGCCGAGAATTAGTGCAGGCGGTGAAAAAGCCGGCTACGGCGCGGAGGCGATCG  
AAGACGATCTGGAACGCCGCGAACGGCAGCAGGAAACTGCCATCGCCACCATGAAACGTTTTTCGCTGGCA  
GGCGATTGTCGCCCTGCTGGTCGGCGTACCGTTATGGTCTGGGGCATGATCGGCGATAACATGATGGTC  
AGCGACGACAATCGATCGCTGTGGCTGGTCATCGGTCTCGTCACCCTCGCGGTGATGGTCTTCGCCGGCG  
GTCACTTCTATCGCAGCGCTGAAAAGCCTGAAAAACGGTACCGCCACCATGGATACGCTGGTCGCCCT  
GGGAACGGGCGTCGCCTGGCTATATTCAATGAGCGTCAACCTGTGGCCGAGTGGTTTCCGATGGAAGCG  
CGCCACCTGTATTACGAAGCCAGCGCGATGATTATCGGTCTGATTAACCTCGGCCATATGCTGGAGGCC  
GCGCGCGCCAGCGTTCCTCGAAGGCGCTGGAAAACTGCTCGACCTGACGCCGCTTCGGCACGCGTTGT  
GACGCCTGAAGGGGAAGAAGATCTGCCGCTCACCGAAGTCCAGGCCGGCATGACCCTGCGCCTGACCACT  
GGCGATCGCGTTCGGTTGACGGCGTGATAAGCCAGGGCGAAGCCTGGTTTGATGAAGCGATGCTCACCG  
GCGAGCCGGTGCCGAGCAAAAAGGCGATGGCGACGCTATTCATGCCGGTACCGTGGTGCAGGATGGCAG  
CGTACTGTTTACCGCCAGCGCCGTCGGCAGCCAAACCACGCTGGCACGGATTATTCGCATGGTGCGCCAG

GCGCAAAGTAGCAAACCGGAAATTGGCCAACTGGCAGATAAAATCTCTGCGGTATTTGTTCCGGCAGTGG  
TAGCCATTGCGCTGATTAGCGCCGCTATCTGGTACTTCTTCGGCCCGGCGCCGCAAATCGTCTATACCCT  
GGTCATTGCCACCACGGTACTGATTATCGCCTGTCCATGCGCATTGGGCCTGGCGACGCCGATGTGATC  
ATCTCCGGTGTGCGACGGGCGGCGGAATACGGCGTGCTGGTGCCTGACGCCGATGCTCTGCAGCGCGCCA  
GTGAACTCGATACGCTGGTGTTCGATAAAACCGGTACCCTGACCGAAGGCAAGCCGCAGGTGGTGGCCGT  
GAAAACCTTCGCCAGCTTTGATGAATCCACTGTCGTGCGGCTTGCCGCCGCGCTCGAGCAGGGTTCAAGC  
CATCCGCTGGCGCGGGCGATCCTCGATAAAGCCGCTGACAGCACTTTACCGGAGGTAAGCGGCTTCCGTA  
CCCTGCGCGGGCTCGGCGTCAGCGGTGAAGCGGAAGGCCATCAACTGCTGCTCGGCAACCAGGCGCTGCT  
TAACGAGCAGCATATCGCTACCGCTGAACTGGAAAGCGAGATGACGGCACAGGCCTCGCGCGGCGCCACG  
CCGGTGCTGCTGGCGATCGATGGTCAGGCCGCTGCGCTGTTGCCATCCGCGACCCGTTACGGGAAGATA  
GCATCGACGCGCTGGCGCGCTGCATCGTCAGGGCTACCGGCTGGTGATGCTGACCGGGGATAACCCTAC  
TACCGCCAATGCCATCGCCAAAGAAGCGGGCATTGATGAAGTGATAGCCGGCGTGCTGCCGGACGGCAA  
GCCGATGCCATTAAACGTCTGCAGAGCCAGGGGCACAAAGTGCGATGGTCGGCGACGGTATTAACGACG  
CCCCGGCGCTGGCGCAGGCGGATGTCGGTATCGCCATGGGCGGCGGCAGTGATGTCGCTATTGAACTGC  
GGCGATCACCTGATGCGCCATAGCCTTAACGGCGTAGCCGATGCTTTAGCGATTTGAAAGCGACGTTA  
CGCAACATGAAACAGAACCTGCTGGGCGCGTTTGTATAACTCGCTGGGTATCCCGATTGCCGCCGGGA  
TCCTCTGGCCGCTGACCGGTACCCTGCTGAACCCGGTGGTCGCCGGCGCTGCAATGGCGCTGTCGTC  
CACCGTGGTGAGTAACGCTAACCGCCTGCTGCGCTTTAAACCGAAAGATTAG

>gi\_292897734\_Erwinia amylovora ATCC 49946 chromosome\_44

ATGTCGCAAGTCACCCTACTGACGCTGGACGGATTGTCCTGCGGGCACTGCGTAAAACGGGTAAAAGAGG  
CGTTGGAGCAGCGCGCCGACGTGGAGCAGGCGGAAGTCAGTATCACCGAAGCACGCGTGAGCGGAAGCGC  
CAGCGCCGGGGCGCTGATCGCCACGGTTGCCGGGGCGGGCTATCACGCCAGCCTGGCTGAAACGTTCCG  
CGCCCAAAGACTGACCCGCTGACAGACTCAGACATTCAGCCGGAAGCGCTGACAGCGGCCACCAGCGAGC  
TTCCGGCGCAACAGAGTGAATGCCTCCAGTTACTGATTGATGGTATGAGCTGCGCCAGCTGCGTAGGCCG  
CGTCCGGAATGCGTTGCACAATGTGCCCGGCGTCAGCCAGGCACGCGTCAACCTTGAGAACGCAGCGCG  
CTGGTGCTGGGCTGCGCGTTACCCACCGCATTAAATCGAAGCGGTGAGCCGCGCCGGATATCACGCGGAAA  
TCGTTGAAGACGAGGCGAAAAGGCGCGAAAAACAGCAGAAAAGCGGGCTGGCGGCGGTAAAACGCTTCCG

CTGGCAAGCAACGCTGGCGTTGGCACTGGGTGTTCCGCTGATGATTTGGGGGATGGCCGGTGACAATATG  
ATGCTCACCGCAGCCAATCGCGACGGCTGGCTGGTGGCAGGAGTTATGACCCTGCTGGTGATGATTGTTG  
CCGGCGGCCATTTCTACCGCAGCGCCTGGAAAAGCCTGTAAATCGTAGTGCCACGATGGATACGCTGGT  
AGCACTGGGTACTGCAGCCGCCTGGCTCTACTCCATCACGGTAAATCTCTGGCCTGAGCTGTTCCCGATG  
GCGGCACGCCATCTCTATTATGAAGCCAGCGCGATGATTATCGGCCTGATCAATCTGGGACATATGCTTG  
AGCAGCGCGCCCGTCAGCGCTCATCACGGGCGCTGGAAAGTCTGCTGGATCTACCCCCGCCACCGCACG  
CGTCGTAACCAAAGATGGCGTACAACCTCGCTCACTTAGCGAGGTACAGCCGGGGATGACGCTACGCGTG  
ATGACCGGCGATCGTGTGCCGGTTGACGGCACTGTCGTGCAGGGAGAGGCCTGGCTGGATGAAGCCATGC  
TCACCGGTGAAGCCATCCCGCAGCACAAAGCACCGGGCGATACCCTGCATGCCGGAACCCTGTTGCAGGA  
CGGTAGCGTACTGTTGCGTGCCGGGGCCGTCGGCAAAAACACCACCCTGGCGCGCATCATCCAGCTGGTG  
CGTCAGGCCCAGAGTAGCAAGCCGAAATCGGCCAGCTGGCGGATAAAATTTCTGCGGTCTTTGTCCCGG  
TAGTGGTGGCGGTGCGGCTACTGAGCGCTGCCGTTTGGTATCTGTTCCGGCCGGCGCCTCAACTGGTTTA  
CACCTGGTGGTAGCCACTACCGTGCTGATTATTGCCTGCCCTGTGCGTTGGCCTCGCCACACCGATG  
TCGATTATTGCCGGCGTGGGGCGGGCCCGCAATCCGGCGTGCTGGTGCGTGATGCCGATGCGCTGCAAC  
GCGCAAGCACCTGGACACGCTGGTTTTTGATAAAACCGGCACGCTGACCGAAGGCACGCCGCGCGTGGT  
CGAGGTTATGCTGTTTAACCAGGCCGATCGCCAGACGGTGCTGCAGCAGGCGGCGGCTCTGGAACAGGGT  
GCCAGCCATCCGCTGGCGCGGCTATCGTCGCCCATGCCGGGCTGGCTACGCTGCCGGACGTTGAGCAAT  
TTCGTACCATAGCGGGCAAAGGCGTGAGCGGCGTTTTCGACGGTAGCGCTCTGCTGCTGGGTAACGCGGC  
GCTGATGGCGCAGCAGCAGATTGCCACCGATGCCGTCTCAATGCAGATGTCACGGCTGGCAGCAAAGGGC  
GCCACACCGGTACTGCTGGCGGTGGATGGCCAGATCGTCGCCCTGTTTGCCATTCGCGATGCGCTGCGCA  
AAGAGAGCGTCAGCGGTTGCAACGCCTGCACCAGCAGGGTTACCGCCTGGTGATGCTGACCGGTGATAA  
TGAAATAACCGCCCATGCCATCGCCGCGAGGCAGGAATCGAGCGCGTGATTGCCGGGGTGTTCCTGAG  
GGCAAAGCCGAGCTATCAGCGCCCTGCAACGGCAGGGGCACCGGGTAGCGATGATTGGCGATGGCATCA  
ACGATGCCCCGGCGCTGGCCCAGGCCGATGTGGGGATTGCCCTCGGCGGCGGCAGCGATGTGGCGATTGA  
AACGGCAGCGATGACGCTGATGCGCCCGGACCTCAATGTTCTGGTGGATGTTTTAGCCATCGCCAAAGCC  
ACGCTGCGCAATATGAAACAGAATCTGCTGGGTGCTTTTATTTATAATGCCTGCGGCATTCCGCTTGCTG  
CCGGCGTGCTCTATCCGCTGACCGGAACGCTGCTCAGCCCGTCTGTCGCGGCGGCGGCGATGGCGCTGTC

TTCAATAACCGTTGTGAGCAATGCCAATCGCCTGATCCGCTATCGCCCACCGACGTGA

>gi\_283783779\_Citrobacter rodentium ICC168 chromosome\_45

ATGTCGCAAACCATCGACCTGACCCTGGACGGCCTGTCTGCGGTTCATTGCGTGAAACGCGTAAAAGAGA  
GTCTGGAGCAGCGCCCGGACGTTGAGCAGGCGGAAGTGTCTATTACGCAAGCCCATGTCACCGGCACCGC  
CAGCGCCGACGCGCTTATCGAAACCATTAAACAGGCCGTTACGGCGCAGAGTTAAGCCACCCAAAGGCT  
AAACCGCTGGCGGAGTCATCAATCCCGTCGGAAGCGCTGGCAGCGGTCCCTGATGAGCTTCCGGCAGCCG  
CGGCTGAAGAAGATAGCCAACAGCTGCTGCTCAGCGGCATGAGCTGCGCCAGCTGTGTACCCGGGTACA  
AAACGCGCTGCAAAGCGTACCGGGCGTCACCCAGGCACGGGTAAACCTTGCGGAACGCACTGCGCTGGTG  
ATGGGCAGCGCGTCCGCAACCGATTTAGTGCAGGCGGTGGAAAACGCGGGCTACGGCGCCGAGGCGATTG  
AAGATGACGTTAAACGCCGCGAACGCCAGCAGGAAACGGCTATCGCCACCATGAAACGCTTCCGCTGGCA  
GGCTATCGTCGCCCTGCTGCTCGGGGTGCCGGTGATGGTCTGGGGCATGATCGGCGACAACATGATGGTC  
ACCGCAGACAACCGCAGCCTGTGGCTGGCGATTGGTCTGGCGACCCTCGCGGTGATGGTGTTCGCTGGCG  
GCCATTTCTACCGCAGCGCGTGGAAAAGCCTGATGAACGGTACCGCTACTATGGATACGCTGGTGGCGCT  
CGGTACCGCGTAGCCTGGCTCTACTCGATGAGCGTCAACCTGTGGCCGAGTGGTTCCCGATGGAAGCG  
CGCCATCTCTATTACGAAGCCAGCGCGATGATTATCGGCCTGATCAACCTCGGACATATGCTGGAAGCGC  
GCGCGCGTCAGCGTTCATCGAAGGCGCTGGAAAATACTCGATCTCACGCCACCGACGGCGCGGGTGGT  
GACCGACAGCGGCGATAAGAGCGTACCGCTGGCAGAAGTCCAGCCGGAATGCTGCTGCGCCTGACCACC  
GGTGACCGCGTGCCGTTGACGGTGAATTACCCAGGGTGAAGCGTGGCTGGATGAAGCGATGCTCACCG  
GCGAGCCGCTCCCGCAGCAGAAAGGCGCAGGCGACAGCGTGCATGCCGGGACGGTTGTCCAGGACGGCAG  
CGTACTGTTTTGCGGCCAGCGCGGTCCGGCAGCCATACGACGCTGTCGCGCATTATCCGTATGGTGCGCCAG  
GCGCAGAGCAGCAAGCCGAGATCGGCCAACTGGCGGATAAAATCTCTGCGGTATTTGTCCCGGTGCTCG  
TAGTCATTGCGCTGGTGAGCGCCGGGATCTGGTATTTCTTTGGGCCTGCGCCGCAAATTGTCTATACCCT  
GGTTATCGCCACAACGGTGCTGATTATCGCCTGTCCGTGCGCGCTGGGACTGGCGACGCCGATGTCGATT  
ATCTCCGGCGTAGGCCGCGCGGGAGTTCGGCGTGCTGGTACGTGACGCCGATGCCCTGCAGCGCGCCA  
GTACGCTGGATACCGTGGTGTTCGACAAAACCGGGACGCTGACCGAAGGCAAACCGCAGGTCGTGGCGAT  
CAAGACATTCGCCGAGTAGATGAAGCGCAGGCGCTGCGTCTGGCGGCGGCCCTTGAGCAAGGTTCCAGC  
CACCCGCTGGCGCGGGCGATACTCGACAAAGCGGGCGATATTACGCTGCCTCAGGTCAACGGCTTCCGTA

CCCTGCGGGGCTGGGCGTCAGCGGCGAAGCCGAAGGCCACACGCTGCTGCTGGGTAATCAGGCGCTGTT  
GAACGAGCAACAGGTTGCTACAACGGAAATGGAGGCAGAGATTGCCGCCAGGCATCACAGGGCGCCACG  
CCGGTGCTGCTGGCAATTGACGGCACCGCGGGCGTTGCTGGCGGTGCGCGATCCGCTGCGCAGTGACA  
GCGTGGCGGCGCTCCAGCGCCTGCACCGCGCCGGATAACCGGCTGGTTATGTTGACCGGCGATAACCCGAC  
GACGGCAAACGCCATCGCTAAAGAGGCCGGCATCGATGAGGTGATCGCCGGGGTGCTGCCGGACGGTAAA  
GCCGATGCCATTGACGCTGCTGCAAAGCCAGGGACGCCAGGTGGCGATGGTAGGTGACGGCATCAACGATG  
CTCCGGCGCTGGCGCAGGCTGACGTCGGCATCGCAATGGGCGGCGGCAGCGACGTGGCGATTGAAACCGC  
GGCGATCACCTGATGCGCCACAGTCTGCTGGGCGTTGACAGACGCGCTATCCCTTTCCCGCGCGACGCTG  
CGCAATATGAAACAGAACCTGCTCGGCGGTTTATCTATAACAGCATCGGTATTCCGGTTGCCGCGGGGA  
TCCTGTGGCCGTTACCGGCACCCTGCTGAATCCGGTCGTTGCTGGCGCCGCGATGGCGCTTTCATCCAT  
CACCGTGGTCAGCAACGCCAACCGGCTGCTGCGCTTTAAACCGAAAGAGTAA

>gi\_325295716\_Cronobacter turicensis z3032 chromosome\_46

CTGAGGAGACAACGTATGTCAAACACCATAGAACTGGCCCTGGACGGGCTTTCCTGCGGACACTGCGTAA  
AACGGGTGAAAGAGAGCCTGGAACAGCGCCCCGACGTTGAACGCGCTGACGTCATATCGAACATGCCAG  
CGTACCACCACCGCGCCTGCGGACGCCCTGATTGAGACGGTGAACAGGCCGGCTACGACGCGACGCTC  
GCACACCCAAAGGCTAACCCGCTGACAGAGTCATCAACCCCGTCGGAAGCACTGACAGCGGCGCAACCTG  
AGCTTCCGGCAGCGGATATCGCCGACGATGACGACAGCCGACAGCTGCTTATCAACGGCATGAGCTGCGC  
CAGTTGCGTGAGCCGCGTTCAGAGCGCCCTGCAGGGGGTCGAGGGCGTCACGCAGGCACGGGTCAATCTC  
GCGGAGCGCACGGCGCTGGTGATGGGCCACGCCTCCGCCGCTGACTTAATTGCAGCGGTTGAAAAAGCGG  
GCTACGGCGCCGAAGCCATCGATGACGACGCCGAACGCCGGAACGCCAGCAACAGACCGCGCAGGCGGC  
CATGAAACGCTTTCGCTGGCAGGCGGCGCTCGCACTCGCCGTGGGTATTCCGGTAATGATCTGGGGCATG  
TTCGGCGACAACATGATGGTCACCGACGCAAACCGTTCGCTCTGGCTGGTCATTGGCCTTATCACGCTCG  
GCGTGATGATTTTCGCGGGCGGCCACTTCTACCAGAGCGCCTGGAAAAGCCTGCGCAACCGCAGCGCGAC  
CATGGATACGCTGGTGGCGCTCGGCACCGGCGCGGCATGGCTCTACTCCATGAGCGTCAACCTCTGGCCG  
CAACACTTCCCGATGGAAGCGCGCCACCTCTATTACGAAGCCAGCGCCATGATCATCGGCCTGATTAACC  
TCGGCCATATGCTGGAGGCGCGCGCCCGCCAGCGTTCGTCGAAGGCGCTGGAACGCCTGCTGGATCTGAC  
GCCGCCAGTCGCGCGCGTCTCACGCCGAAGGCGAGAAAAAATTACCGCTGGCGGAGGTGACGCCGGGC

ATGACGCTGCGCCTCACAAACCGGCGATCGCGTGCCGGTGGATGGCGACATTACCGATGGCGAAGGCTGGT  
TTGACGAAGCGATGCTAACCGGCGAACCGGTGCCGAGCAAAAAGCGGCAGGTGACACCATTACGCGGGG  
CACCGTCGTGCAGGACGGCAGCGTGCTGTTCCGCGCCGCCGCGGTGGGCAACCACACCACGCTGTCGCGC  
ATTATCCGCATGGTGCGCCAGGCGCAGAGCAGCAAGCCGGAAATCGGCAAGCTGGCCGACCGCATCTCCG  
CCGTGTTTCGTCCCGGTGCTGGTGCTGATTGCGCTGTTAGCGGCGCGGTCTGGTATTTGCGCGCCCGGC  
CCCGCAGATCGTTTATACGCTGGTGATTGTACTACGGTGCTGATCATCGCCTGCCCTGCGCGCTGGGG  
CTCGCCACGCCGATGTGATTATCTCAGGCGTCGGGCGCGCGGCGGAATTCGGCGTGCTGGTGCGTGACG  
CCGACGCGCTGCAACGGGCAAGCGACGTAGACACGCTGGTGTTGACAAAACCGGTACCCTGACCGAAGG  
TAAACCGCAGGTGGCGGCCATCGCCACCAGGGCGACATCACCGAAGCGGACGCGCTGCGCCTCGCCGCC  
GCGCTGGAGCAAGGCTCCAGCCACCCGCTGGCCCGCGCCATCATCGAGCGCGCCGAAGGGGCTTCGCTGC  
CCGCCGTCAGTGGCTTTCGAACGCTGCGCGGTCTTGCGGTTAGCGGCGAGGCGCAGGGGAAAACGCTGCT  
GCTCGGCAATCAGGCGTTGCTGGAAGAAAACGGCATCGCGACCGACGCGCTGCGCGATGAGGCGCAGCGT  
GAGGCGAGTCTCGGCGCCACGCCGGTGTGCTGGCGGTGAACGGTACGCTGGCGGCCCTCTTCGCCATTC  
GCGATCCGCTGCGTGACAGACAGCGCCGACGCCCTGGCGCGTCTGCACCGCGAAGGCTACCGCCTGGTGAT  
GCTGACTGGCGATAACGCCGTCACCGCAAACGCCATTGCCCGCGAGGCGGGTATTGACGAGGTGATCGCA  
GGCGTGCTGCCGGATGGTAAAGCGCAGGCGATTAGAAAGCTCCAGCAGGCAGGCCGTAAAGTGGCGATGA  
TTGGCGATGGCATTAAACGACGCCCCGGCGCTGGCCAGGCGGAAGTGGGGATCGCGATGGGCGGCGGCAG  
CGATGTGGCCATTGAAACCGCCGCGATCACCTGATGCGTCATAGCCTGACGGGGGTGGCCGACGCGATG  
GCGATTTCAAAGCGACGCTTGGCAATATGAAGCAGAACCTGCTGGGCGCTTTTATTTATAACGCGCTCG  
GCATTTCCATCGCGGCAGGCGTCCTCTGGCCGCTGACCGGCACCCTGCTGAACCCGGTGGTCGAGGCGC  
CGCGATGGCGCTCTCGTCGATTACCGTCGTACGTAACGCCAACCGGCTGCTGCGGTTTAACCCGAAAAA  
TAA

>gi\_209693634\_Aliivibrio salmonicida LFI1238 chromosome\_47

ATGAGTCAGAACTTACCCTACCCCTAGCGGGATTAATTTGTGGTTCGTTGTATCGCAAAGTGGAAAAAG  
CACTTTAGAGATCCCGAAGATATCTCATTCTCGGTAACCAAACAGAATTAACATTAACGACGACACT  
CTCTTATGAAGAAATCGCAGAGAATATTACGCAATTAGGCTACTCCATTCTGAACCCGAACTCATCACT  
TTGTACCTAGCAGGATTAAGTGTGGTAAATGCATAAATAAAACCACAGACACGTTAAGTACCTTGTGCGC

ATACCTCTATTGAGTCTATTTCAAAGATAAAATCACGCTAAACACCGTGCACTCTCAAGAAAGCATCAT  
TGAATTAATTGAATCCATCGGTTTTCAAGCAAGCTCTGCCCCCTTCATTCCAGATAGTCCCTTACCTAAA  
GAAGAGGTCATTACTIONCTGAATAAAGAAACACCGACAGATCAAAGCAAACCTGAAAAACAAAAAATAGAAA  
AAACAACACAATTAATTTTTATCGGGAATGACTTGCGCTAGCTGTGTGCGCCTCTGTAGAAAAAATAATTC  
AGCCGTTGCTAATGTTCAATCTGTCAGTGTTAATTTAGCGGAACGTACCGCTTTAATTTATGGTGATATC  
AATGCACCTGAACTGATCAAAGCAATAGAAAAAGGCGGTTATGGTGCAGAGATCAGTTTAAGCGAAGAAC  
AACGCCGTAAGCCAAAAAGAACAAATACCTAAAAACCACCGTAGCACATAAAAGAAATACCATTATGTC  
GCTCGCAATAGGCGCGCCATTGATGCTTTGGGGGGTATTTGGTGGCAACATGCAAATAACAACCGTTAAC  
GACCAACTTGCTTGGGGACTCATTGGGCTTATTTGTTAGGTTTACTTACCGCTGGGAAACATTTTT  
TTGTTAATGCCTGGAAAGCATTACTCATCACAGAGCGACAATGGATACGTTAGTGTCTCTTGGTACTGG  
TTCAGCTTGGCTCTACTCTATGGCACTGGTGATCTATCCTGCATTTTTCCAGAGCAAGCTCGTCATGTT  
TATTTTGAAGCCACCGCAATGATCTTAGGATTAATTACGCTCGGAAATCTAATCGAAACCAAAGCTCGTA  
ATCGCACATCAAATGCCATCGAAAAGCTGCTCAATCTCAGCCTCAAACCGCTACGGTTATCCAAGATGG  
AAAAGAAGTAGAGTTGCCAGTGGCACTCGTAACGAAAGGGATGATCATTAAAATTAACCGGGAGAGAAA  
ATCCCAGTTGATGGTTCGATCATCAGCGGTGAAAGCTATTTAGATGAAGCAATGCTTACTGGAGAGCCTC  
TTCCTTGTTTTAAAAATAAAAGACGATGTTGTGCATGCAGGAACCATCAATCAACAGGGTAGCTTTACTTT  
CACAGCAACGAATGTCGGTGAACATACTATGCTTGCTCGGATCATTGCCATGGTACGTAACGCGCAAAGT  
AGCAAACCAAACCTGGCTAAGCTCGCGGATAAAATCTCATCCGATTTTGTCCCAAGCGTTATGATCATCG  
CCATTTTTTCGGCTTTACTTTGGTATAACTTTGGTCCAGAACCAACATCGAGCTACATGCTTGTTGTTGC  
TACAACGGTACTCATCATTGCCTGCCCTTGCTTTAGGTCTTGCAACACCAATGTCAGTGACTIONGTTGGT  
GTCGGTAAAGCCGCTGAGTTTGGCGCATTAAATAAAAGACGCTGACGTTTTACAAACAGCAAGTCATATCG  
ATACCGTGGTGGTTGATAAAACGGGCACATTAACAGAAGGAAAACCCACGGTCAGTAAAGTGACAAGCTT  
TGCGGCTTACAATGAAAAAGACATCATTTTATTTCGCAGCAGCAATCGAAAGTCACTIONCTGAACACCCACTC  
GCTCATGCAGTAATGACATATCTCAATCAGCATTGATGGGATTTAGTACCAGTACACAGTTTAATGCTC  
AATTAGGCCTAGGAGCTTCTGCAAACATTGCTGGCGAGACTGTGTTTATAGGAAATACCTCTTATTTATT  
AAACAATGAGATTGCCACTCTGACGTTGAATTATCTCTGCATCAACGCCTCTCTTTGTGGCGATAAAT  
AAAGAATGTATTGGTGTATTGAAGTAAGTATGCAATTCGACCCGATTCAAACCTTGCTGTAGCCCAAT



T T A C T C A A C T C G G T A T T A A T G T C G T A A T G C T C A C A G G T G A T C G C A A G A A A C T G C T A A T T A T G T G G C T C A  
A C A A C T C G G A A T A A C T C A T G T T G T T T C G G G G G T A T T A C C C G A T G G G A A G C T C A G A C A A T A A A A G A C T T A  
C A A G C T C A A G G A A G A A A G T A G C T A T G A T T G G G G A T G G C A T T A A T G A T G C C C C A G C G T T A G C T C A G G C A G  
A A G T A G G G A T T G C G A T G G G C A A T G G C A G T G A T G T C G C G A T T G A A A G C G C T C A A T T G A C C T T A A T A C G A C A  
C T C A C T G C T T A C C G C C G T T A A T G C G A T T G A G C T T T C A A G A G C A A C C A T T A C A A A T A T G A A A C A G A A C T T A  
T T C G G T G C C T T T A T T T A T A A T G C G A T A G G C A T T C C T A T T G C T G C C G G T A T T C T T T T T C A T T A C T G G T A  
T G T T A C T C A G T C C T G T T G T A G C A G G A G C A G C G A T G G C A C T T T C T T C T A T T A C C G T T G T A T C C A A T G C A A A  
T A G A T T A C G A C T T T T T A A A T C T C A G T T T T C A A A C A A C A T A C T G A C T A G

>gi\_400756305\_Geobacter sulfurreducens PCA chromosome\_48

A T G C G T A A G G T C T T G T T T C C C A T C A C C G G C A T G A G C T G C G C C G G G T G C G C G G C C C G G A T C G A G A A G G A G C  
T G G G C G G C G T G G C G G G C A T T G C C T C G G C C G T G G T C A A C T T C G C C A C C G C C G A G T T G T C C G T G G A G T T C G A  
C G A A C G G G T G A T C G A C G A G G A T G C C G T G G T G G C G C G G G T G G A A G C C C T G G G C T A C G G A G T G G T G C G C A C G  
G C G G C C G G G G A G C T G C G T T T C G G G G T G C G G G G G C T G C A C T G C G C C T C T G C G T G G C G A A C C T G G A G A A A A  
A G C T C C T G G C C G A C C C G G C C G T G T C C G C C C G T G G T G A A C C T G G C C A G G A G G A G G C C C T G G T C C G G T T  
C G A T C C C T C C C G C C T G G G C A A G G C G G A C A T C T T C G C C C T G G T G G T G G C C G C G G G T A C A C C C C C G T G G A G  
C C C G A A G C G G A A G G G G G G G A G G C C G C C G G A G T T G A A G G G C C A G C G C A A C T G G T T C A T T G C C A G T C T T C  
T G C T C T C G C T C C C C A T C A T G G C C A C C A T G A C C C T C C A C G A C A A C C G G G C C G T G G G C T G G A T G A A C C T G G T  
C C T G G C C A G C G C G G T C C A G T T T T C G G C C G C C T C A C C T T C T A C C G G G G A G C T G G T T C G C C C T G A A G A A C  
C G C A G C G C C A A C A T G G A C G T G C T G G T T G C C C T G G G C A C C T C G G C C G C C T A T T T C T A C T C C C T C T T C G C T T  
T T T T C G G G G C C T T C G G C G A G C A T G G C G G C C A C G T G T T C T T T G A G A C C T C G G C C A T G C T C A T C G C C T T C A T  
C C G C C T G G G C A A G T A C C T G G A A G C C C G G G C C C G G G G C A A G G C G G G G A A G C C C T G A A G A A G C T C C T G C G G  
C T C C A G G C G G A C A A G G C G C G G C T G G T G A C C G G C G A C C A G G A G C G G G A A G T C C C C G C G T C G G C G G T G C G G G  
T G G G C G A T C T G G T C C G G G T C C G G C C G G G C G A G A C G A T C C C C G T G G A C G G G G A G G T G G T G G A G G G A A C C T C  
G T C G G T G G A C G A G T C C A T G G T G A C C G G C G A G T C G A T C C C G G C G G A C A A G G G G C C G G G G C C G C G G T C A C C  
G G G G C C A C G G T G A A C C G C A G C G G C G T G C T C C T G G T G C G G G C A C C C G C A T C G G C G A G G A A A C G C T T C T C T  
C C C A G A T C G T G C G G A T G G T G C G G G A G G C C C A G G C G G A C A A G G C G C C G A T C C A G C G G T T C G C C G A C C G G G T  
G T C C G G G G T C T T C G T G C C G G T G G T G A T C G C C C T G T C G G C C C T C A C G T T C G C C C T C T G G T T C T G G G G G C T C

CACCAGGAGTTCCTCTTTGCCTTCAAGCTGGCCATCTCCGTGGTGGTCATCGCCTGCCCTGCGCCATGG  
GGCTCGCCACCCACCACCATCATGGTGGGGAGCGGGTGGGGCTGTCGCGGGGATTCTGGTCAAGCG  
GGGCTCGGTGCTGGAGAACATCTCCCGGGTCCAGGCGATCCTGCTGGACAAGACCGGCACCCTCACCCGA  
GGCGAACCTCCCTACCGACCTGGTGCCGGCGCCGGGGTGACGGAGGAGCGGCTGCTGGCGGTGCTGG  
CCGCGGCCGAATCCCCTCGAACCATCCCCTGGCCAGGCGGCGTAAGCGGCGCCGCGGACGGGGCGT  
GGTGCCGGCGCCGGTGGACGGCTACCGGGAGACCGAAGGGGGAGGCGTGGCCTGCGTCTGGACGGTGAA  
CCGGTAACGGCCGGCAGCGCCCGTTCTGGTCCGGGCGGGCATCGACACTTCGCCCTGGAGCAGGCCG  
CATCCCGTTGGCCGGGGAGGGGAAATCGCTCATCTCGTGGCCGAAGCGGGACGCTGCTGGGGGTGGC  
GGCCTGGCCGACCGGCTCAAGGAGAGCTCGCCCCGGCCGTGGCCGAGCTGAAGCGAATGGGGATAGCC  
ACCTGCATGATCACCGGCGACCACCGGGAGGTGGCGGCCGCCGTGGCCGGGAGGCGGGGGTTGACAGCT  
TCGAGGCCGAAGTCTGCCGGCCGCAAGGAGGAAATCGTGCGGGAGTACCAGGCAAAGGGTACTTCAC  
TGCCATGGTGGGCGACGGGATCAACGATGCCCCGGCCCTGGCCCGGGCCGACGTGGGGATCGCCATCGGC  
GGCGGCACCGACGTGGCCAAGGAGACCGGCGACGTGATCCTGGTGCGGGACGACCTCATGGATGCCGTGC  
GCGCCATCCGCTGGGGCGGGCGACCCTGGCCAAGGTGAAGCAGAATCTCTTCTGGGCCCTGTTCTACAA  
CATCCTCGGCATCCCCGTGGCCGCCGGGGTCTCTACTATCCGCTGGGGATCACGCTCCGGCCCCGAATTC  
GCCGGGCTTGCCATGGCCTTTTCTCGGTGTCGGTGGTGACCAACTCGATCCTGCTCCGCCGGGCGGGAA  
AGAAGCTGGGCTAA

>gi\_224367124\_Desulfo bacterium autotrophicum HRM2 chromosome\_49

ATGGTTTGTGTTAAGAATATTCACGTATCTGGAATGAGCTGCGGACATTGCGTCAACAGCGTAACCCAGA  
CCCTGGAAGCCATACAGGGCGTAAGTTCGGCAAGGGTCTCCCTTGAAGATTCAACGGCTGAAGTGACCTT  
TGACCAGGAGGCCGTTGACCTTGAACTTTAAAGGCCCATCAGGGAAAAGGGGTTTGGCACTGAAGCA  
CCCTCGCCAATCAATAACAAGCCGTTTACCATTATTGCCCCGAAAAACGTTGAACCGCCCTTTGCCCGGC  
AAAGACAGCCGTTGAAACAAGCTTTAAAATTGAGGGTATGTCCTGTGCCAACTGTTCCAACACCATAGA  
AAAAACCTTAAAAAATCCAAGGGCATAGAAAAGGTCTCGATCAATTTCTCCATGGAAAAGGGATTTGTA  
ACCTATGACCCAAGCCTGGTGGATGAGCAGGGCATCTTGAATCGTCCAGCGGGCAGGTTATACTGCCT  
TCAGCCAGGAAGAAAAAAGAACAGAGGATTCTCCATTGCCAGAAAAGAGCGATTCCGGTTTATTTTTGC  
AGCAAGCCTGACCATCCCCCTGGTCTTCTCATGTACACCATGCCCTTTGGCCATGCCAACCAACTAT

TCCATGGGCCTGCTTGCCACCCTGGTAATGGTTGTGTCTGGCCGCACCTTTTACGAGGGTGCCTTTCATT  
CCCTGAAAAACCGTTCGGCAAACATGGATGTCCTCATCGCCCTTGGCATCTCTGCTGCCTATTTTTACAG  
CCTTTTTCTTTGCTCGTCCTTGACCCCGCGGCCATACCTTTTTTGACAGTGCAGCCATGCTCATCACC  
TTTATCCTGCTGGGCAAATGATCGAGGCCAAGGCCAAGGGTCAAACAGGCGAGGCCCTTGAAAACTCA  
TCTCCCTTGGGGCTGACAGGGCAAGGATCCTAGTCAACGGCAGCGAACACATGGTCAAGGCGTCCGAGAT  
AAAAAAGGCGATTTTTTTTTCCGTCCGGCCCGGAGAAACCATTCCGGTTGACGGTCAAATCGTCGAGGGA  
ACCACCACCATTGACGAATCCATGATCACTGGCGAAGCCATTCTGCGGACAAGATCAAGGGCGACCCGG  
TAACCGGGGCCACCATCAACCAGACAGGTGCCATCACAGCCAGGGCCGTTTCGAGTGGGCAAAGAAACCAT  
GCTCGCAAGGATTGTCAAGATGGTTGAGGAGGCCAGGCAGACAAGGCCCGATCCAGAGACTTGCCGAC  
ACCGTGTCCAACACTTTGTCCCGGTGGTGGTCATTGCCGCCATCCTCACCTTTATTGTCTGGAACTTTG  
TTGTTGAATATCCGCCGCCCTTGGGTATCACCCGGTTTCTTTGCCTTTCAGCTGATGATCGCGGTACT  
GGTTGTGGCCTGCCCTGCGCCCTTGGCCTTGCCACCCACGACCATAATGGTGGCAAGCGGTGTGGGT  
CTTAAAAGGGGAATCCTTTTTAAACGGGCCTCAGTGCTTGAAAATATCTCCAGCTGGATGTGATTCTGT  
TTGACAAAACCGGCACCCTCACAAGGGCAGCCCCAGGGTCTCGGCCATTTACCCCATGGACCATGGATC  
TGAACACCAGGTGCTTAAAATAGCGGCATCCCTGGGGGCCGCATCAATCCATCCCCTGGCCCACGCAATT  
GTTAAAAGGCCGAACAGGCGGGTGTCTCCATGGAAAAAATCTCAAATCAACGGGAAATCCCCGGACACG  
GCTCAACGGGCGAACTTGACGGCAGACCGGTGATGCTTGGCAACCTCAAACCTGCAACCCAGGGAAGCTT  
TCTTTCAGAAGAGGCCCGCAGCAGCCGGTCAGCAGATTCAGATACCGGAGATTCTTCGGTGTATGTATGG  
CAGGACAATACCATGAAGGGCATCATCTCCCTGGCTGATGAAATCAAGGCCGATTCAAAAGAGGCCATGG  
CAAGACTCCACGCCCTTGGCATCAAACAGCCCTTGTCTCTGGGGACAATAAAAAGGCGGCAAAGCGTGT  
GGCTCAGATCGTCGGAATTGATGAAGTCGAAGCCGAGGTGCTACCCGGTGACAAGAGTCGGATCGTCAA  
AAATGGCAGGAACGGGGTTACCGGGTCGCCATGGCAGGAGACGGCATCAACGATGCCCCGGCCCTTGCCC  
AGGCAGACATCGGCATTGCCGTGGGTTTCAGGAACGGACATTGCCAAGGAGACCGGGGACGTAATCTTGGT  
CAACAACTCCCTTTAGACGTTGAACGGGCCATTGGGCTCGGACGAAAGACCCTCAAGACCATAACGCATC  
AATTTCTTCTGGGCCTTTTTCTACAACCTGCTCATGATACCGGTTGCAGCCGGCCTTGCTACCCTGCCC  
TGGGGCTGGTTCTCAAACCTGAATGGGCCTGCATTGCCATGTGGCTGTCTTCACTTACGGTTGTGGGAAA  
TTCCCTGCTCTTGAAAAGATAACCGGTTTTAA

>gi\_426402010\_Bdellovibrio bacteriovorus str. Tiberius chromosome\_50

ATGGAACTCAAGATAACAGCACCGAGTTGCAACTCATTGGCATGTCCTGCGTGAATTGCGCGGGAAAAA  
TTGAAAAGACCTTAAACGGCCTGCCGGCGTGACTGCGACGGTGAATTTTTCGACGGAAAAAGCCCAGGT  
GAACCTGGGGGGAAGTCCCCTGACGGTCGAAAACCTGATCAAGACCATTTCAGGATTTGGGCTATCAGGCC  
TTTGAGGTAAACTCTGAAGTCGACGCACAAAAGATAAAAGAAGAAGCGGCTGCTGAATACCGCAAAGAAC  
TGCGTCTTTTTATTATCTCAGCGATTCTGACAGCTCCCTTCTGGTTGAAATGGCCGTGATGCTGACTGG  
GGCGGGGCATGAAATGATTCCGCGCTGGGTCCAGTGGATTTTGGCGACTCCGGTTCAGTTCTGGATCGGG  
TGGAGATTCTATCGCGGGTCTTATTATGCTCTTAAATCCGGCAGCGCCAATATGGATGTGCTGGTGGCTT  
TGGGAACGACGATGGCTTACGGTTTAAAGTTCGGTGTGACGGCCATGAACTGGCATCATCATCACGTGTA  
TTTCGAGGCCAGTACTGCGGTCATTACTTTGATTCTGCTGGGTAAGTTGATGGAAAGCCGGGCCAAGGGC  
AAAACCTCCGAGGCGGTGGAAGGTCTGCTTCGCCTGCAGCCGAAAAGAGCTTTTGTAGAAAGAAACGGTG  
AAGTCATCTCTTTGGATATCAGTGAACCTTGTGTCCGGGGATGTTGTGGTGGTGA AAAACGGTGAGTCCAT  
TCCGGTGGATGGCCTGGTGGTGCAGGGGACTTCCAGCGTGGATGAGTCCATGCTGACCGGCGAAAGCATG  
CCGGTGCAAAGGGTGTGACGATCGCGTCTATGCTGCGACCTTAAATCAAGATGGCAGTTTTCGTATCA  
AGGCGACGGGGGTGGGCAGCAAAACACAGTTGGCGCAAATCATTAAAATCGTAACGACGGCTCAAGGGTC  
CAAAGCACCGATTTCAGCGTTTGGCTGATAAAATCTCGGCGTCTTTGTTCCAATTGTGGTTCGGGATCAGT  
GTTTTGACTTTCTTCGGCACGTGGCTGTGGACAGGGGATTTGACTCTGGCTTTCATCTCATCAGTGTCCG  
TGCTGGTCATTGCTTGTCCGTGTGCTTTGGGGCTGGCAACGCCACCGCGGTGGTTGTGGGGATTGGCAA  
GGGAGCGCAAGCAGGAGTTTTATTCCGGGATGCCAAGGCTTTGGAGCTTGCTGAAAAAATTGATGTTCTG  
GTTTTGGATAAAACCGGCACCATCACCGAAGGAAAGCCCGTGGTAACTGAAGTTCATGTGACCTCGGGCC  
AGGATAAGAAAGAGGTTCTGACGTTTTCGGCAAGTCTTGAGGCAGGCTCTCCCATCCGTTGGCGCATGC  
AATTTTGAAGAAGCCAAAAAAGAAGGTTTGCCTTTGGCTGCGGTTGAAAGTTTCAAGAGTGTGATGGGG  
CAAGGGGTGGAAGGTCGTATTTCAGGGCCGCTCACTGAAGCTGGGTAAAAGCGCCTGGGTGGCTCCGATT  
TTTCTTTGAATCAGGAACTGTTGAGGGACCTTGAATCCAAAGGTCAGACACTGATGGTGTGCTGGCTGATGA  
GACTCGCGTGCTGGGTTATATTGCGGTGGCCGATCGTATTCGTGAAAGCTCCAAAGAAGCCATTGCCGAA  
ATTCAAAGCGCGGCGTGAAAGTAATGATGCTGACCGGGGATAACGAAGGCACGGCCAAAGAGATATCCC  
GTCAGGCTGGAATCACAGAATACAAACACAGTGTGAAGCCAGCGGATAAAGCCAATGTCATCGTCACCTT

GAAGCGCAAAAACTGCGTGTGGCGATGGTGGGTGACGGTATCAACGATGCCCCGGCATTGGCGATGGCG  
GATGTCAGTTTCTCAATGTCCTCGGGAACAGATATCGCCATTGAAACGGCGGATGTGACCTTGATGAAAA  
ATGATCTGAAGTCCGTGGCCCAGGCCATTGAACTGTGCATCTGACGCTGAAAAAATCCGCCAGAATCT  
GTTCTTTGCATTCATCTATAACGTCCTGGGAATTCCGCTGGCAGCACTGGGAATGCTAAACCCTGTCATT  
GCGGGTGCCGCCATGGCGATGAGTTCAGTTTCAGTCGTCAGCAACTCGCTGCTATTGAAAAGAAAGAAAA  
TCTAA

>gi\_383452024\_Coralloccoccus coralloides DSM 2259 chromosome\_51

ATGAGCACCATGAAGCCCACTGACGAACCCCAGGGCCCCTCCCAGGAAACGCAAGCCGAAGCTCCCTCGC  
TCACGCGCCGCGGTCTGCTCGCGCGCACGGGCGCGACGCTGGCGACGGGCGCCCTGCTGATGCACGGCCG  
CGCCGCCAGGGCGCAATCCAGCGTGCCCGGCGCAAGGCCCCCGCTGAAGGGTCCGCGGCGGACACGGGA  
GGCAAGGTCACCCGGCAATCGCATCTGCCTCCTGGGAAGGAGGGCCGCGACTACCGGCCTGTCGTCGTGC  
CCAACGGCGCGAAGCTGCCGTGGAAGGACGTGGGCGGCGTGAAGGTGTTCCACCTGGTGGCCAGGAGGT  
GGAGCACGAGTTCGCGCCCGGCCTCAAGGCCACGTGCTGGGGTTACAACGGCCACGTGCACGGGCCACC  
ATCGAGGTGGTGGAGGGCGACCGCGTGCCTTCTACGTCACGAACCGGCTGCCTGCGTCCACCACGGTGC  
ACTGGCACGGCGTCTTCTCCCCAGCGGCATGGACGGCGTGGGCGGGTGGAGCCAGAAGGCCATCGCCCC  
GGGAGAGACCTACCGCTACGAGTTCACGGTGCCTCAGTCGGGACGTGCATGTATCACTCGCACCACGAC  
GAGATGACGCAGATGGCGCTGGGCATGGTGGGCCTGTTTCATCATCCACCCGCGCAGGCCGGTGGGTCCGC  
GCATCGACCGGGACTTCGCCATCATGCTGCACGAGTGGCGCATCGACCCGGGACGATGCGTCCGGACCC  
CAACGAGATGACGGACTTCAACATCCTGACGATGAACGCGAAGGCGTTCCCGGGCACGGAGCCGCTGGTG  
GTGCGCAAGGGCGAGCGGGTGC GGATCCGCTTCGGCAACCTGAGCGCAATGGACCACCACCCATCCACC  
TGCACGGCTTCCAGTTCGCATCACGGAGACGGACGGAGGCCGCATCCAGGAGAGCGCGCAGTTGCCGGA  
GACGACGGTGTGGTGCCTACCGGGAGCACGCGCACCATCGAGTTCGTGGCGGACGAACCCGGTGACTGG  
GCCATGCACTGCCACATGACCCACCACGTGATGAACCAGATGGGCCACGACATTCCGAACATGATCGGCG  
TGAAGCCCGGAGGTCTGGACGCGAAGGTGCGGCCCTGCTGCCCGGCTACATGACCATGGGGCAGATGGG  
CATGGGAGACATGGCGGGCATGAGCCACATGCCATGCCCGGCAACTCCATCCCATGGTGGGCGGCAAG  
GGCCCTACGACGAGATCACCATGGGAGGCATGTTACGATCCTCAAGGTGAGAGATCGCCTGGAGGGAT  
ACGCCGATCCCGGCTGGTACACGCCCGCGCAGGGGACGCTGGCCCGGCTCGCCAGTTGGATGAGCTGCG

CCGGGACGGCATCGACGTCTAG

>gi\_94986445\_Lawsonia intracellularis PHE/MN1-00 chromosome\_52

ATGTTGCATAGCAACCTAATACTGTTGGAGCTAACTGTGTCTAAACAACAGACATTGAACTTTATTGTCA  
AAGGCATGAGTTGTACCTCATGTTCTTCAAGGCTTGAGCGTACATTAGGTAATATTCCTGAAATACAATC  
TGTTACTGTAAGCCTTAATAATTCAATGGCAACAGTTATTCCAATCCCTGAAGCTAATATAAAAAAGCTT  
ATTCAAGAAGTCATTTCTGAAACAGAAAAACTGGTTTTATTGCTAACTACTTAGCAGAAGATCTTGCTG  
AACAAAAACATGGATTCTTCAACAAGAATCCATCTCTCATTACTTAGAGGAACTCAAACAACGCCTTAT  
TATAGAATCTTTTTACTATACTAGTTCTCTTCATTTCAATGGGACCAATGTGGGGAGTTCCCTGTCCCT  
GTATTTGTTAATCCTAAAACATATCCTCTAATAATGCTATTGCACAACCTTTATTAECTATTCTGTAA  
TTTGGTCAGGTAGATATTTTTACCTTATAGGATTCTCAAGGCTCTGGAAAATGAGTCCTAATATGGATAC  
ACTTGTTGCTCTTAGTACTAGCGCTGCTATAATCTATAGTATATGGTCCACAATAGAAATAAGCTTTGGA  
AACTATTATACTGAACCTAGTCTCTATTATGAAACAGCAGTTGTCCTTATTACACTCATTCTTTAGGAA  
AATATTTTGAATGCTCTCACGCTTCAGGATGTCAGATGCAATAAGCCGATTAATGAACTTAGTCCAGA  
AACAGCATTACGCCTTTCTTCTCTATCTGATCAAGAAGAATCTTTGAGGAAGTGCCTCTTAGCAATATA  
AAAGTAGGAGATATTGTTCAAGTGCGTCTGGCTCAAAAGTTCCTGTAGATGGGAAAATATTAAGGCT  
CTTCAAGCATTAACTTCAATGCTTACAGGTGAATCTATGCCTGTTTTTGTAACTGTAGGAGACAAAGT  
TATTGGTGGTACTATAAACCTTTCAGGCATGTTTCTTATGCATGCAGAAAAAGTTGGACTTAATACAGCG  
TTAGCACACATTATACGCCTAGTTCGTGAAGCACAAGGTTCTAAAGCACCAATATCTCGTATAACAGACC  
AAATAAGTCTTATCTTTGTACCAGTAGTTATAGCTATAGCTTTAGTAAGTGGACTTACATGGTTGTTACT  
TGCGGATACATCTATTGCAGATTCTATCCGTATTGTTATGACTGTACTTGTAATATCTTGCCCTTGTGCT  
TTAGGATTAGCAACTCCTATGTCAATTATGATTGCCACAGGAAGAGGGGCACAATTAGGACTTCTTATTA  
AATCTGGTGCAGCACTTGAATATGCAGCAGATCTTGATACTATTGTTTTGATAAAACAGGAACACTTAC  
AGAAGGAAAACACACCTTATTCATACAGTTCCTTAAAAACAATGCCAGATAATGAACTTCTTCGTATA  
ACAGCCTCATTAGAAGCTGTATCAGAACATCCTTAGCAGATGCTATTGTGAGAGCTGCACATAAACATG  
GCCTTGTACTTTACCCTGTTATAAACTTTATGTCCTATCCTGGTCGAGGAGTACGTGGAGAACTTCAAGT  
GAAGACAGAATCTATAACTGTTTTAGTTGGTAACAAAACATTCTTGAAGAACATCATATTTCTTTAGAC  
AATAAAGTAGGAATAACAACCCTTGAAGAATTTGCAGGACAAAGCTTTATATCTTTACTTGTAGCTATAA

ATGGACAGTTTTTCAGGGATAATTGCAGTAACTGATCCTATTCGAGAAGAAAGTAATAGTGTAACAGAACA  
ATTACAGCATATGGGAATCCGTACAATTATGCTTACAGGTGATAGTAAACAAACAGCTCAAATAGTTGCT  
AATCATTACACCTGAATGAAGTTATTGCTGATGTAATGCCAGAAGGGAAAGCTTATGCTATCCAAGAAC  
TTAAAAATAAAGGATTCGTGTTGGAATGGTTGGTATTAATGATGCACCAGCTCTTGCTAAGGC  
TGATGTAGGAATAGCCATAGGAAGTGAATAGATATAGCAATTGAAACAAGTGATATTGTTCTTCTAAT  
TCTTTATCAACAAATCATCCACTATCTGGCTTAGTTTCGGCACTCTTATTGAGCCGTGCTACTCTTAGGA  
ATATTCGACAAAATCTTTTTTGGGCATTTGGTTATAATATAATATGTATACCAATCGCTGCAGGTATATT  
AAAACCTCTTTGGTGGGCCTTTACTTTACCTATGCTAGCTGGTCTTGCAATGGCACTTTCATCTATATCT  
GTCGTCCTTAATGCATTACGACTGAAAAAATTTACACCATCTTAA

>gi\_153002879\_Anaeromyxobacter sp. Fw109-5 chromosome\_53

ATGAGCGAGGCTCCCGGAGCGCACGAGTCGAACCCGCGCGGGGATCACGCGGGCGGCTTCGTCCAGT  
GCGTCGCCCAGGCCGGGGCCGCGGTGAGCCTCGGCCTCGCGCCGGGCCGCGAGGCGCGGGCCCGGCCCGC  
GGGAGCCACGGGAGCGCCCCGGTGTCTGACGCGAGCGCCGGTCCCATCGACCTCCGCGTCGAGCGCACG  
CGCGTCGAGATCGGCGGACGGCGTGGCGAGGCGGTACCCTGAACGGCGTGCTCCCCGCGCCGCTCCTGC  
GCTTCCAGGAGGGGCGCGAGGCGGTGATCCGCGTCCTCAACACGCTCGACGAGGACACCTCGATCCACTG  
GCACGGCGTCTCTGTCGCCAAGCGGATGGACGGCGTTCCCCAGGTGAACTTCCCCGGGATCCGGCCGGGC  
GAGACGTTCTGTACCGCTTCCCGTTCGGCAGTACGGCACGTAAGTATCACGCTCACTCCGCGTTCC  
AGGAGCAGCTCGGCCACTACGGGCCGCTCGTCATCGAGCCGCGGAGGGGATCGCCGTTACCTGGGATCG  
CGAGCACGTGGTGCTGCTCTCGGACTGGACGTTTCGAGGACCCGCACCGGATCTTCGCGAAGCTCAAGAAG  
CAGCCCCACTACTACAACTTCCAGAAGCGCACGGTCGGCGACTTCTTCGCGACCTCGGCAGGAAGGGCC  
TCGGGGCGACCCTCCGCGATCGGGCCGAGTGGGGCCGCATGAACATGAACCCGACGGACCTCGCGGACGT  
CACCGGGGCGACGTACACGTACCTCGTGAACGGGATCGCTCCGGACGGCGGCTGGACCGCCTCGTTCCGG  
CCCGGGCGAGCGCGTCTGCTCCGGTTCATCAACGCCTCGGCGAGCACGTTCTTCGACGTCCGGGTCCCCG  
GCCTCGCGATGAAGGTCGTGAGGTGAGCGGCCAGTGGGTGAGCCGGTTCGACACCGAGGAGATCCGGAT  
CGCCATCGCCGAGACGTACGCGGTGCTGGTGGAGCCGAGCGAGGACCGCGCCTACGCGATCTTCGCCGAG  
GCGCTCGACCGGAGCGGGTTCGCCAGGGCGACGCTGGCGCCGCGCGCCGGGTTGCGCCCCCACGCCGG  
AGCGCCGGAGGCGCGCGCTGCTGACCATGGCCGACATGGGCATGGCCACGGCGCGATGGGCGGCATGGA

GGGGATGCAGGAGGGCGGCCGCGGACACGGGGGAGAGCGAGCAGGTGGCGCCGCGCACGCGGGGCACGC  
C

GCCGCGGCGTCCGCGGGGCCGAGGCCGCCGGGCGCGCTCCCGAGCCGAGGCCGCACGGGCCCGATTCCC  
ACGGCCCCGGCAACGCCGCGATCCCGATGATGACTCGCAGCCGGCTCGAGGAGCCGGGCATCGGGCTCGG  
CGACGACGGCCGCGCCGTCTCACCTACGCGGCGCTCCGCGCGCGGAGCCACGACCCGACTTCAGGGCG  
CCCGACCGGGAGATCGAGCTCCACCTACCCGCAACATGGAGCGGTTTCATGTGGTCGATCGACGGCGTGA  
AGTACTCGGACGCCGAGCCGATCCGGGTGCGCCCCGGCGAGCGCATCCGGCTCACGCTCGTGAACGACAC  
GATGATGAACCACCCCATGCACCTGCACGGGATGTGGATGGAGCTCGAGAATGGGCACGGCGAGCGGATC  
CCGCGCGTACACACCGTGAACGTCAAGCCAGCGGAGCGCATGTCGCTGTTGTTACGGCCGACGCCCCCG  
GCCCCGTGGGCGTTCCACTGCCACGTCTCTACCACATGGAGGCGGGCATGTTCCGCGTGGTCCAGGTCTC  
CGAGCGCGGAGCGACGGAGCCCGCGCGGGGAGGAGCGCGGCGGAGGAGCCCGCCATGATCATGG  
A

TGA

>gi\_162448269\_Sorangium cellulosum chromosome\_54

ATGGACCGACGTGCTTTCATCCACGCGGGCGGTCTGGCCGCCGCGCCCATCCTCACGCAAGGGCTCG  
CCCATGCGCAGCAGCGCCCTGGCGCGCCGCCGGGGGCGCCGCTGCGCCCCGCCTCGCCGGACCGC  
GGCGCCCGGGGGCAGCCCGCCGTGGTGACGCCAACGGCAGCACGCTCCCGCTGCGCGTGGTGGACGGC  
GTGAAGGTCGGCCACCTCGTCGCCGGCCCCCTCGAGCACGAGATCGCCCCGGCCTGAAGAGCGAGGTGT  
GGGGCTACAACGGGAGCACGCCCCGCCCCGACCATCGAGGCGGTGAGGGCGATCGCCTGCGCATCTACGT  
GACGAACTCCCTGCCGGAGGCCACCACGGTCCACTGGCACGGCCTCGTGCTGCCAACGGCATGGATGGA  
GTCGCCGGGCTACCCAGCGCCCGATCGAGCCCGGCGAGACGTATGTTTACGAGTTCGTCTGCGGTATC  
CGGGGACGTACATGTACCACTCGCATTTGACGAGATGACCCAGATCGCGCTGGGCGCGGTGGGGATGTT  
CGTCGTGCACCCGAGGAGGCCAGGGGGCCGCGTGTGGACCGGGATTTCTGTCTGATGACGCACGAGTGG  
AAGATCAACGCGGGGGCGCGCCGGCCCCGACCCGAACGCGATGAGCGACTTCAACGTCCTCACGTTCAACG  
GCAAGGCGTTCCCCGCGACGGCGCCGCTCGTCGTGCGCCGCGGCGAGCGCGTGCGCGTGCGCCTCGGGAA  
CCTCGGCCCGATGGATCACCACCCGATCCACCTGCACGGCCTGTGTTCCAGGTCACGGCGACGGACGGC  
GGGTTCTGTTCCCGAGTCGGCCAGTACCCGAGACGACCGTCCTGGTCCCGGTGCGCAGCACGCGGGTCA  
TCGAGTTCGTCCCCGAGGAGCCGGGCGACTGGGCGATGCACTGCCACATGACCCATCACACGATGATGCA



GATGGGCCATGGCCTGCCGAACATGGTCGGCGCCGAGACCCGCGCGCTCGATCGGCGGATGCGCCGCGTG  
ATGCCCCGGCTACATGACGATGGGGACCACGGGGATGGGCGGCATGGGCGAGATGCCCATGCCGATCCCCG  
CGAACAGCCTGCCGATGCGCGGGCGGGCCGGCCGTTCTCGTACATCGACATGGGGGGCATGTTACCGT  
CCTCAAGGTCCGCGACGATCCGGACAAGGCGGATCCGGCCGGTGGTACGTGCACCCGGCGGGCACCGTG  
GCCGGACCGGCGAGCGCCGAGCGGATGCGGGCGGACGGGATTGACCCCGCTTCTGGAGGGAAGCCGGGCG  
GGTGA

>gi\_15611071\_Helicobacter pylori J99 chromosome\_55

ATGAAAGAATCTTTTTACATAGAGGGAATGACTTGACGCGCTGTTCTAGCGGGATTGAACGCTCTTTAG  
GACGTAAAAGTTTTGTGAAAAAATAGAAGTGAGCCTTTAAATAAGAGCGCTAACATTGAATTTAACGA  
AAATGAAACCAATTTAGACGAAATTTTTAAACTCATTGAAAACTGGGTTATAGCCCTAAAAAACTCTA  
GCAGAAGAAAAAAGAATTTTTAGCCCTAATGTTAAATTAGCGTTGGCGGTTATTTTCACGCTTTTTG  
TGGTGTATCTTTCTATGGGGGCGATGCTTAGCCCTAGCCTTTTACCTGAAAGCTTGCTTACGATTAACCA  
TCATAGTAATTTTTAAACGCTTGCTTACAGCTTATAGGCGCGCTCATTGTCATGCATTTGGGGAGGGAT  
TTTTACATTCAAGGGTTTAAAGCCTTATGGCACAGACAACCAACATGAGCAGCCTTATCGCCATAGGCA  
CAAGTGCTGCCTTAATTTCAAGCCTGTGGCAATTGTATTTGGTTTATACCAATCATTATACCGATCAGTG  
GTCTTATGGGCATTATTATTTTGAAGCGTGTGCGTGATTTTAAATGTTTGTGATGGTGGGCAAACGCATT  
GAAAACGTTTCTAAAGATAAAGCCTTAGACGCCATGCAAGCTTTGATGAAAAACGCCCCAAAAACCGCCC  
TTAAATGCACAATAACCAACAGATTGAAGTTTTAGTGGATAGCATTGTGGTGGGGGATATTCTAAAAGT  
CCTCCCTGGAAGTGCGATTGCGGTGGATGGCGAAATCATAGAGGGCGAAGGGGAATTAGATGAGAGCATG  
TTAAGCGGCGAAGCGTTGCCAGTTTATAAAAAAGTCGGCGATAAAGTCTTTTCAGGGACGCTCAATAGCA  
ACACGAGTTTTTTAATGAAAGCCACGCAAGATAACAAAAACAGCACCTTGTCTCAAATTATAGAAATGAT  
CCATAACGCCCAAAGCTCAAAGGCAGAGATTTCTCGCTTAGCGGATAAAGTTTCAAGTGTATTTGTGCCA  
AGCGTGATCGCTATCGCTGTTTTAGCGTTTGTGGTGTGGCTCATCATCGCGCCTAAGCCTGATTTTTGGT  
GGAATTTTCGCACCGCTTTAGAAGTGTGTATCGGTTTTGGTGAATTTCTTGCCCTTGCCTTTGGGGTT  
GGCTACGCCTATGAGTATTTAGTGGCGAACCAAAAAGCGAGTTCTTTAGGCTATTTTTTAAAGACGCT  
AAAAGTTTAGAAAAAGCAAGGCTAGTCAATACGATCGTTTTTGATAAAACCGGCACGCTCACTAACGGCA  
AGCCTGTCGTTAAAAGCATCCATTCTAACATAGAATTATTAGAGCTATTGAGTTTAGCGAGCAGCATTGA

AAAGAGCAGCGAACATGTCATTGCTAAGGGGATTGTAGAATACGCTAAAGAGCGTAATGCCCCCTAAAA  
GACATTAGCGAAGTTAAAGTGAAAACGGGCTTTGGCATCAGCGCTAAAGTAGATTATCAAGGCGCTAAAG  
AAATCATCAAAGTGGGCAACAGCGAATTTTTTAACCCTATTAACACGCTAGAAATTAAGAAAACGGGAT  
TTTAGTGTGGGTAGAGCGATCAATGAAAAAGAAGACGAGCTTTTAGGGGCGTTTGTTTAGAGGAT  
TTGCCAAAAAAGGCGTGAAAGAGCATATCGCTCAAATCAAAAATTTAGGCATTAATACTTTTCTTTGA  
GTGGGGACAATAGGGAAAATGTCAAAAATGCGCGCTTGAATTAGGGATAGATGGTTATATCAGTAACGC  
TAAACCGCAAGACAAGCTCAATAAGATCAAAGAGCTTAAGGAAAAAGGGCGGATCGTGATGATGGTGGGC  
GATGGCTTGAATGACGCCCTAGCCTTGCTATGAGCGATGTGGCGGTGGTGATGGCTAAAGGGAGCGATG  
TGAGCGTGCAAGCGGCGGATATTGTGAGCTTAATAACGATATTAATCGGTTTATAGCGCGATTAAT  
AAGCCAGGCGACCATTAATAATCAAAAGAAAATTTGTTTTGGGCTTTTTGTTATAATAGCGTGTTTATC  
CCTTAGCTTGTGGGGTTCTTTATAAGGCTAATATCATGTTAAGCCCGGCGATTGCGGGTTTAGCGATGA  
GCTTAAGCTCTGTGAGTGTGGTCTTAAACTCCCAAAGGCTAAGGAATTTTAAAATTAAGGATCATTGA

>gi\_154173617\_Campylobacter curvus 525.92 chromosome\_56

ATGCCAGCAGATTTGAACGACTATTTCAATAAGCGCAAACCAAGCGGCAATGACGGCGACAAAGAGCCTA  
AGATAAATTTCAAAGCTCCGAAATTGCCAAGCGGCTTTGGTAAATTCGGCACATTAGCTTATATCATAAT  
AGCCATTATCGCCGTCTTGGTCATAACTCAGCCCTTTGTCGTGATAAATTCAGGCGAGGTAGGCATCAAG  
GCCACCGCAGGAAAATACGAACCAAACCCGCTCAGCCGGGATTTCACTTTTTCGTGCCGTTTCATCCAAA  
AGGTCATCGTGGTCGATACCAGAGTGCGACTCATCAACTACACATCAGGCGAGGATATGGGCGAGTCGGT  
GCAAAAGTCATTTCAAGGCTCTGGTGCGGGCATAATCCGCAAAAATTCATCTCAGTGTTAGATGCCAGG  
AATTTACCGGTCAGCATCGACATCACCGTGCAATACCGCCTAAATCCGGAAAACGCACCGCAGACTATCG  
CGTCTTGGGGCCTTAGCTGGGAGAGCAAGATCGTAGATCCCGTAGTGCGTGATGTCGTGCGAAGTATCGC  
GGGTAAATACACGGCCGAGGAGCTTCCGACCAAGCGTAACGAGATAGCCACTCAGATAGATGACAGCATA  
AGAAAAGATATCGACGCTCAGCCAAACCGCCCGGTAGAGCTTTGGCCGTTTACGCTACGCGAGATCATCT  
TGCCTGAAAAGGTAAAAGAGCAGATCGAGCGCGTACAGATCGCAAAACAAGAAGCCGAGAGGACCAAATA  
CGAGGTCGAGCGCGCAAATCAAGAGGCCCTTAAAAGGCCGCCCTTGCAGAGGGAACGGCAAAGGCCGCC  
ATAATCGAAGCCAAAGGTAAAGCCGACCGTAAAGATCGAGGACGACGCGCAGGCTTATGCCAACAAAG  
AGGTCGCTAAGAGCCTGGATGAAAATCTACTCAGCCTAAAACAGATCGAAACACAGGGTAAATTCACGA

AGCTCTTCGCGACAACACAGATGCTAAAATTTTCCTAACGCCAGGCGGTGCGGTGCCAAACATTTGGGTC  
GATACCAAAGACAAAGCAAAGCAAAGCTCCGCTACGCAAAGATAA

>gi\_526459392\_Arcobacter butzleri\_57

ATGAAATCACAAAAATTTGACATAAAAGGTATGACTTGCTCCGCTTGTTCTACTGCTGTTGATAGAAATG  
TAAAAAATTAGAAGGAATAAATGAAGTTAATGTCAACTTACTAAATAATAGTATGATTGTAAAATATGA  
TGAAAATATACTTAATAATGAAACAATTATCAAAAAAGTTCAAGATGCAGGTTATGAAGCATTTTTAGTT  
GAAAATGGTAAAAAAATCAAAAAATTTAACAGAAGAAAATCTTGGTAAAATAGAACTAATGAATTGA  
AAAATAGATTAATTATATCTTTTATTTTTGCGATACCATTATTTTATATATCAATGGGACATATGCTAAA  
TTGGTATCTTCCTCATTATTTTCATGGATATTCAAATGCTATAACTTTTGCTTTTACTCAATTTTTATTA  
GCTTTACCAATAGTTTTTATAAATATAAAATACTATAAAGTAGGATTTAAACCTTATATAAAGGTTCTC  
CTAATATGGATTCTTTGATAGCTATTGGAACAAGTGCAGCTATGATTTATGGAGATTTTTCAATCTATAA  
AATAGGTTATGGTTTAGGAAATAATGATATAGATATGGTGATACAATATTCTCATGATTTATATTTTGAA  
TCAGCAGCTATTGTTTTAACTTTAATAACACTTGGAAAAGTTTTTAGAAGCAAGAGCAAAAGAAAATACTA  
GCGAAGCTATAAACAACTTATAAATTTAACTCCCAAACAGCTTTAGTTTTAAGAAATAATCAAGAGAT  
TGAAATTCCTATTGATGAACTCATTTTTAAAAGATATAGTTATTGTAAAACCTGGAAATATCGTTCCAACA  
GATGGTGTTATTATCTTTGGAAATAGTTCTATTGATGAGTCGATGTTAACAGGTGAGAGTTTACCAATTT  
CTAAAAAGTTGGAGATAAAGTAATAGGTGCAAGTATAAATAAATCTGGTTCTTTCAAATTTGAAGTTAC  
AAAACCTGGGAGAAGATACAGTTTTATCACAAATTATAAAATTGATTGAAGAAGCAAGTTCTTCAAAGCT  
CCTATTTCAAACCTTGCAGATAGAATAAGTGCGATTTTTGTACCAACAGTTATAGTTATATCAATACTTG  
CAACTGTTACATGGTTGTTTTGGGATATTCATTTGAATTTGCATTATCTATTGGTATTGCTATTTTAGT  
TATTTCTTGCCCTTGCTTTAGGACTTGCCACACCAACAGCTATTATGGTTGGAAGTGGAAAAGGTGCT  
CAAATGGAATATTAATTAAGTGCAGAATCTTTAGAGATAGCTCACACTATAAATACAGTTGTTATTG  
ATAAACAGGAACTATAACTGAAGGAAAACTCAAGTAACTGATATTTTTACAAGTAAAAGATTACTCA  
AGATAAATTACTTCAATTATGTGCAACAATTGAAAAAACTCAGAACACCCTTTAGCTGATGCAATATTA  
AAAAAGCACAAGAAAAAGAAATTGAACTTTTAAATGCAACTGATTTTGAAGCACTTAATGGTTTAGGAA  
TAAAAGCAAAGTTGAAGATAGAGTTTTTTATATTGGAAATAAGAAATTATTAGATAGTAAAAATATCTC  
TTTAGATTTATTTTATGAAAAGAGTGAAAAGCTGGCAAATGAAGGTAAAACACCAATATTTATTGCAGAC

GAAAGTGAAGTTTTAGGATTGATTGCTATTTCTGATGTTGTAACCAACAAGCAAAGATGCTATTTTAG  
AGTTTGAAAAAATGGGCTTAGAAGTAATAATGCTAACAGGTGATAATTATAAACAGCAAATGCAATAGC  
AAAACAAATAAATAAATAATGTAATAGCAGAAGTTTTACCTCAAGATAAAGAAAAAGAGATACAAAAG  
CTTCAAAGTTTAGGTAAAAAAGTTGCAATGATTGGTGATGGAATAAATGATGCACCAGCTTTAGTTGAG  
CAGATGTAGGGATCGCAATAGGAGCTGGAAGTATAGCAATAGAATCTGCAAATATTGTACTTGTA  
AAGTGATTTATTAGATGCCGTAAAAGCAATTCAATTAAGTAATGCAGTTATAAAAAATATAAACAAAAT  
CTATTTTGGGCATTTTTTTATAATATAATAGGTATTCCTTTAGCTGCAGGAGTGTTTTATACAGTGCTTG  
GTTGGAAATTAAGTCCAATGTTTGCAGGTGCAGCTATGAGTTAAGTAGTGTAAACGGTTGTTTTAAATGC  
TTAAGATTAAGTTATTTGAACCAAGAATTAGTAAAAATTTATTAGAAAAAACAATATTTCAAAGGA  
GATAAATGGAAAAATTTTAAAAGTTGATGGAATGACTTGCAGGACATTGTAAAGCAAGAGTTGAAAAAG  
TGGTTAGTCAATTGATGGTGTGATAGTGTGAAGTTGATTTAGCTTCTAAAAATGTTACAGTTAAAAAT  
GTCAAAGATATATCAGAGCAAACCTTTATCTGATGTAATAGTAGATGCTGGATACGAAGTTATCAAATAA  
>gi\_152991597\_Sulfurovum sp. NBC37-1 chromosome\_58

GTGCAGAGGAGAACATTTATAAAGGGAGTGGCTGCAAGCTCTTTCATGGGTATTGCAGCAACGGACCTGC  
AGGCGGAATCGCCAAAAGATCGTCAGACAAGAGGCGTACACTGACGGGCAAAGAGTTTTTTCTTGATAT  
TGACTATACACCTGTCAACATTACCGGAAAGAGATCGGTGCGGACGACTATCAACGGTCAGATACCCGGT  
CCGACTCTGGTGTGGCAGGAGGGCGATACCGTTACGATCCATGTGACAAACCACCTGAAAAAATCCTCTT  
CCATACACTGGCACGGCATCATACTGCCCTATCAGATGGACGGTGTACCGGGTATCAGTTACAAAGGGAT  
CGCGCCGGGCGAAACATTACCTATCGTTTCAAGGTACGGCAGCACGGTACCTACTGGTACCACAGCCAT  
TCGGGTTACCAGGAGCAGACGGGGATGTACGGCGCCATCGTCATCAAGCCGCGGAAGAGAGAACCCTTTC  
GTTATGACAAAGACTATGTGGTCCTTCTCTCGGACTGGAGCGACGAAAAACCGACAAGCATCTACAGAAA  
GCTCAAACCTTTCAAGCGATTACTACAACCTCAACCGTCGAACTGTAGGCGACTTCTTCTCTGAAGTGAAG  
AAAAAGGGCTTTGGCAAGGCATTCGATGACCGAAAGATGTGGAATCAGATGCGTATGAGCGACAGGGATC  
TTTCTGATGTCACAGGGTATACCTATACCTACCTGATGAACGGGCGAATCCTGCCACGCAGTTCAAAGC  
GCTGTTCAAAAAAGGCGAGAAGATCCGTCTGCGTTTCATCAACGGTGCGGCAATGAGCTTTTTTCGATGTA  
CGGATACCCGGGCTGAAGATGACCGTGGTGCAGCGGACGGGAACCACATCAAGCCCGTCAGGGTTCGATG  
AGTTCCGCATAGGGGTGGCCGAGACCTACGATGTCATTGTCGAGCCGACATCGAACAGAGCCTATGCCAT

TTTTGCCCAAAGTATCGAACGAAGCGGGTATGCACTCGGTTCACTGACCCCGTCGGCCTCCAAACTGGCA  
AGCGCACCGAAAATGGACAAACCTCAAGCGTTGACCATGGCGGATATGGGGATGGGTATGTCCAAAATGG  
GCAAGGACAAAGGTATGAAAATGCCGATGAAGAAAAGTATGAAAAGTACAGATGGAGCGCTATGGAAGC  
AGAGAAATATCCGATTACGAAATTGCCTATAGCGACAGGCCCGCAGAGTACGATGAAAGCGATGGCCCCG  
AAATACCGTCTTGAAGACCCGGGGGTAGGGCTTCGCAATAACGGACGACGTGTTCTGACCTATGCCGATA  
TGAAGAACCGCTATTCGACACGCAGAGCAAAAAACCGGACAGAGAGATCGTCCTGCATCTTACCGGCAA  
TATGGAACGCTATATGTGGTCGATCAACGGGATCAAATATGCCGATGCAAACCGCTGGTATTTCACTAT  
GGTGAACGGCTTCGTATCACCTTTATCAACGATAACAATGATGAACCACCCCATGCACCTGCACGGAATGT  
GGAGCGACCTCGAAACCGGTGACGACAACCATCTGGTACGCAAGCATAACGATCGTCGTACAGCCCGGAGC  
GAAGATCAGCTACCGTGTGACCGTCGATGCCAAAGGTGGCTGGGCGTATCACTGCCACCTGCTGTACCAT  
ATGGCGGGCATGTTTCAGAAAAGTAGAAGTGGTATAG

>gi\_152989753\_Nitratiruptor sp. SB155-2\_59

ATGCAACGCAGAGATTTTTTGCGAAGTAGTGCACTCTTTGGTCTTATCGCTGTCACTCCTGCTCTTGCAA  
AACAGGATATCGGAGAGCATCAGCCAACACAACCTCCTTGAAGGAAACGAATTTGATCTGCATATTA  
GACGTGGGTACGTTTTGGCGACAAGCCTGTTATAGCAACCACGGTTAACGATATGTTGCCGGCTCCCACG  
CTGAAATGGAAAAAGGGTGATTTTGTACGATTCACGTGACGAACCATCTTGATGAGCCTACCTCTTGC  
ATTGGCACGGTATCATCTTACCCTATACGATGGATGGAGTACCGGGTGTGAGTTATCCTGGGATTATGCC  
AGGAGAACGCTTTACGTATCGGTTCAAGGTAGAGCAAAACGGTACCTACTGGTATCACTCTCACAGCGGT  
TTTCAAGAACAGACCGGTTTACACGGGGCAATCGTGATTGATGACGATATAGATGCCGATAGAGACTATG  
TGGTAGGTTTTTACGACTGGAGTGACGAAGATCCAGATACCATATATAGAAAGCTAAAACCTCAAAGCGG  
ATACTACAATTTTCAAAAAGAACAGTTTTTCGATTTTGCAAAAGAGGTACAGCAGTTTGGATTTGCCAAA  
GCTTTGCAAAGACGAGCAATGTGGAACAAGATGCGTATGGATGATAGAGATCTTCTGATGTGACTGCCT  
ATACGTATACCTACTGCATCAACGAACATACAAACAAAATCCAGCCATTTTTTCTTTAAGCCTGGTGA  
GAAGGTTCTTTAAGACTGATCAACCAATCGGCAATGAGCTATTTTGATGTAAGAATCCCGGATTGAAG  
ATGAAGGTTGTGGCTGCAGATGGCGTGCCCGTTGAACCGGTGAGGTGGATGATCTTCGCATCGCGGTGG  
CTGAAAGTTATGATGTATTGGTTTGTCCAACGCAAGAAGCCTATACCATTTTTGCTCAAAGTATCGATCG  
GTATGGGTATGTGTATGGAATCTTGAGCACTTCACCTCAAAAAGAGCTCCTATACCAGAGTCCTATCCG

TATGAACCTCTCTATGGTGGATATGGGTATGGCTATGGATGGGATGAAAATGAATCATATGAAGAAAA  
AAATGGCTCATAACAAAGATTCCAAAGACCCCTTGCCTATGAAAAAGGGAATTGCTTGGACGATGGA  
GGCAAAGGGTGCAAGGTATAGACTTGATGATCCAGGAGTTGGATTAAGAAGCGTTCAAAGAAAAGTTTTA  
ACCTACGCTGATCTGCATACGCCAAATATCGAAAACAGATTTCCAGATCGTGAGATCCAATTGCACTTAA  
CAGGCAATATGGAGCGCTATATCTGGGCAATAAACGGGATTCCTTACTACGAATCAAAACCTTTGCAGTT  
TCGTTATGGTGAAAGACTGCGAATAACGTTTATCAATGATACGATGATGAATCATCCGATGCATCTTCAT  
GGTATGTGGAGTGATATCGAAAAAGCAGATGGAAAAATTTTTCGAAAACACACCGTCAATGTGCAGCCGG  
GCAGTAAACTGAGTATGCGCATCAATGTGGATGCAACTGGGCGATGGGTTTTTCATTGCCATCTACTGTA  
TCACATGGGTGGGATGTTTCGAGAAGTAAAGGTGCTCTCATGA

>gi\_255767013\_Bacillus subtilis subsp. subtilis str. 168 chromosome\_60

TTGAGTGAACAAAAGGAAATCGCGATGCAGGTCTCTGGTATGACCTGTGCGGCATGTGCTGCCAGAATTG  
AAAAAGGCCTGAAGCGGATGCCCGGTGTACGGATGCAAATGTTAATCTGGCAACGGAAACATCAAATGT  
AATCTACGATCCTGCTGAAACAGGGACTGCAGCGATTCAGGAAAAAATAGAGAAGCTGGGCTATCACGTC  
GTTACAGAAAAAGCTGAATTCGATATTGAGGGCATGACCTGTGCGGCTTGCGCCAATCGGATTGAAAAAC  
GGCTTAACAAAATAGAAGGCGTCGCAAATGCACCAGTAACTTCGCTTTAGAAACAGTTACGGTCAATA  
CAATCCAAAAGAAGCGTCTGTGACGCGATTTGAAAGAAGCGGTAGATAAGCTTGGATATAAGCTAAAGTTG  
AAGGGTGAACAGGACAGTGAGGCTGCTGCTAAAAAGAAAGAAGAACGGAAGCAAACGGCGAGACTGATTT  
TTTCAGCTGTCCTGTCATTTCCATTGCTTTGGGCGATGGTGAGCCATTTTACATTTACATCATTATTG  
GGTACCGGATATATTTCTCAATCCGTGGATGCAGTTTGCCTGGCGACACCAGTCCAGTTTCTGATCGGC  
TGGCCGTTTTATGTGGGTGCGTATAAGGCGCTTAGAAATAAAAGCGCCAATATGGATGTATTGGTCGCC  
TCGGTACGACGGCTGCTTACGCTTATAGTCTTATCTAACTTTTCAAAGCATTGGCTCTCACGGGCATAC  
AGACGGCCTTTATTATGAAACAAGCGCGATTTTGTGACGCTGATTTTATTAGGCAAGTTGTTTGAACA  
AAAGCAAAGGCCGTTCTCGGATGCGATTAAAAAGCTGATGAAGCTTCAAGCGAAAACAGCTACTGTTG  
TAAGAGACGGACAGGAGCAAATCATCCCGATCGACGAAGTGCTTGTTAATGACATTGTTTACGTCAAACC  
TGGCGAACGAATTCCTGTGACGGAGAAGTGGTTGAAGCCGTTTCAGCGGTTGACGAATCGATGATTACA  
GGAGAAAGTCTTCTGTTGACAAAATCCTGGTGACAGCGTGACAGGTTCAACCGTTAACGCAAACGGCT  
TTCTGAAAATTAAGCTGTCAACGTCGGAAAGGATACTGCGCTTTCTCATATCATCAAATTTGTTGAGGA

AGCACAAAGGGTCAAAGCGCCGATCCAGCGTCTCGCTGACCAGATTTTCAGGCATTTTTGTACCCATTGTA  
TTGGGGATTGCGGTTCTCACTTTTCTCATTTGGTATCTTTGGGCGGCTCCTGGCGATTTTGCCGAAGCGA  
TCAGCAAGTTCATTGCGGTTCTTGTCAATTGCCTGTCTTGCGCCCTCGGTCTTGCCACTCCGACGAGCAT  
AATGGCTGGATCTGGACGCGCTGCTGAATTCGGGATTTTATTTAAAGGCGGCGAGCATTTAGAAAAACA  
CATCGTCTCGATACAATTGTTCTTGATAAAACCGGAACCGTGACAAACGGGAAGCCGCGTCTGACGGATG  
CCATTCCATTGCGCCGTTTTGAAGAAAAAGATTTGCTTCAATTTGCAGCGGCAGCGGAAACGGGATCAGA  
GCATCCGCTTGCGGAAGCGATTATTGCTGGCGTGAAAGATAAAGGGCTTGAGATACCGAACTTACCCGC  
TTTGAAGCAAAAGTCGGCGCAGGCATTTTGGCTGAAGCCGGAGGAAAAAGCATTCTCGTCCGACACAAGAA  
AATTAATGGAGAGCGAACAGGTTGAGCATGGGGCTCTTCTCGCCCAATGGAAGAGCTAGAGGCCGAAGG  
GAAAACAGTTATGCTTGTATCCATTGATGGAGAAGCAGCGGGGCTAGTAGCAGTTGCAGATACGATTAAG  
GATACGTCGCGGAAGGCTGTTGCCCGTCTGAAAGAGTTGGGTCTTGATGTCATCATGATGACAGGAGACA  
ATCGCAGAACCGCAGAAGCCATCGCGAAGGAAGCGGGAATTGCGAATATCATTGCGGAAGTTCTTCTGA  
ACAAAAGGCGGCGGAAATCGCCCGCTTGCAAAAAGAAGGCCGCCAGACAGCAATGGTAGGCGACGGAATT  
AACGATGCGCCGGCGCTTGCCACAGCTGACATCGGCATGGCGATTGGAAGTGGCACGGACATTGCCATGG  
AAACAGCAGACATTACACTTATTCGCGGCGATCTGAACAGCATTGCCGACGCAATCCGCATGAGCAGATT  
GACAATGAAAAACATTAACAAAACCTTATTCTGGGCGCTTGGCTATAACAGCCTCGGCATCCAATCGCA  
GCACTTGGATTTTTAGCACCGTGGATAGCAGGAGCAGCAATGGCATTGAGCTCCGTTTCCGTTGTTCTGA  
ATGCTCTTCGTCTGCAAAAAGTAAAATGA

>gi|29165615:2632362-2634770 Staphylococcus aureus subsp. aureus N315 chromosome, complete genome\_61

GTGGCTAATACGAAAAACAACATTAGATATCACTGGTATGACTTGTGCCGCATGTTCAAATCGTATCG  
AAAAGAACTGAATAAACTTGATGACGTTAATGCCCAAGTGAATTTAACTACAGAGAAAGCAACTGTTGA  
GTATAACCCTGATCAACATGATGTCCAAGAATTTATTAATACGATTCAACATTTAGGTTACGGTGTCACT  
GTAGAACTGTGAATTAGACATTACAGGTATGACTTGTGCTGCATGCTCAAGCCGATTGAAAAAGTGT  
TAAATAAAATGAACGGCGTTCAAATGCAACGGTCAATTTAAACAACAGAGCAAGCTAAAGTTGACTATTA  
TCCTGAAGAAACAGATGCTGATAAACTTGTCACTCGCATTCAAAAATTAGGTTATGACGCGTCTATTA  
GATAACAATAAAGATCAAACGTCACGCAAAGCTGAAGCGCTACAACATAAATTGATTAAGCTTATCATAT  
CAGCAGTATTATCTTACCCTATTAATGTTAATGTTTGTGCATCTTTTCAATATGCATATACCAGCACT

ATTTACGAATCCATGGTTCCAATTTATTTTAGCTACACCTGTACAATTTATTATTGGATGGCAATTTTAT  
GTAGGTGCTTATAAAAACTTAAGAAATGGTGGCGCCAATATGGATGTACTTGTTGCTGTTGGTACAAGTG  
CAGCATATTTTACAGTATTTATGAAATGGTTCGTTGGCTAAATGGCTCAACAACGCAACCGCATTATA  
CTTTGAAACAAGCGCCGTACTIONACTTAACTTATTTCGGTAAGTATTTAGAAGCTAGAGCGAAGTCT  
CAAACAACCAATGCGCTTGGCGAATTATTAAGTTTACAAGCTAAAGAAGCACGCATTTTAAAAGATGGTA  
ATGAAGTGATGATTCCTCTAAATGAAGTACATGTTGGAGATACACTTATCGTTAAACCAGGTGAAAAGAT  
ACCTGTTGATGGCAAATTATTAAGGTATGACTGCCATCGACGAATCTATGTTAACAGGTGAATCTATC  
CCTGTTGAGAAGAATGTTGATGATACTGTAATTGGTTCAACGATGAACAAAAACGGTACTATTACTATGA  
CAGCAACAAAAGTTGGCGGGGACACTGCGTTGGCAAATATTATTAAGTTGTCGAAGAAGCTCAAAGTTC  
TAAAGCGCCGATTCAACGATTGGCAGATATTATTTCTGGTTATTTCTGTTCTATCGTTGTTGGTATCGCA  
CTATTAATATTTATCGTGTGGATTACTTTAGTTACACCAGGTACATTTGAACCTGCACTTGTGCGAGTA  
TTCCGTTCTTGTCATTGCTTGTCCATGCGCATTAGGACTTGCTACACCAACTTCTATTATGGTAGGTAC  
TGGTCGCGCTGCTGAAAATGGCATTTTATTTAAAGGTGGCGAGTTTGTGAAACGCACACATCAAATTGAT  
ACCATCGTTTTAGATAAGACGGGTACCATTACAAATGGTCGTCCAGTCGTGACAGATTATCATGGTGACA  
ATCAAACGCTACAACCTGCTTACTGCTGAAAAAGATTCTGAACACCCATTGGCAGAAGCCATTGTCAA  
TTATGCAAAAAGAAAAGCAATTAACATTAAGTACTGAGACAACAACATTTAAAGCAGTACCTGGCCATGGTATT  
GAAGCAACGATTGATCATCACCATATATTGGTTGGTAACCGTAAATTAATGGCTGACAATGATATTAGCT  
TGCCTAAGCATATTTCTGATGATTTAACACATTATGAACGAGATGGTAAAACCTGCTATGCTCATCGCTGT  
TAATTATTCATTAAGTGGTATCATCGCAGTGGCAGATACTGTCAAAGATCATGCCAAAGATGCTATAAAA  
CAATTGCATGATATGGGCATTGAAGTTGCCATGTTAACTGGCGATAATAAAAACACTGCTCAAGCCATTG  
CAAAACAAGTAGGCATAGATACTGTTATTGCAGATATTTACCAGAAGAAAAAGCTGCACAAATTGCGAA  
ACTACAGCAACAAGGTAAGAAGGTTGCGATGGTTGGTGACGGTGTAATGATGCACCTGCATTAGTTAAA  
GCTGATATCGGTATCGCCATTGGTACAGGTACAGAAGTTGCCATTGAAGCAGCTGATATTACTATTCTTG  
GTGGCGACTTGATGCTTATTCCTAAAGCCATTTATGCAAGTAAAGCAACCATTGTAATATTGTCAAAA  
TCTATTTTGGGCATTGCGCTATAATATTGCCGGTATCCCTATAGCTGCATTGGGCTTACTTGCGCCATGG  
GTTGCTGGTGCTGCAATGGCACTAAGTTCAGTAAGTGTGTCACAAACGCACTTAGATTGAAAAAGATGC  
GATTAGAACCACGCCGTAAAGATGCCTAG



>gi|268318562:1733707-1735632 Lactobacillus johnsonii FI9785 chromosome, complete genome\_62

ATGAAGTTATCAAACATTAAGCGATTTTGGATATCGTTTATCCTCTCTATCCCCATGCTTATTCAAATGT  
TTGCAATGCCATTTTCATTGGATGATGCCAGGATATAACTGGATTGCTCTTATTACAACCACAATCGTTAT  
GGCAATCTCTGCACTTCCTTACTGGAAAAGTGCTATTGCTGCTTTCAAAAACATAGTGCTAATATGAAT  
ACCTTAGTAGCTACTGGTACAGCTGTTGCATATTTCTATAGTATCTTTGCCATGATTACCAACCGTCCAG  
TTTACTTTGAAAGTGCAGCATTGTTACGGTCTTCGTCTTATTAGGCGACGCTATGGAAGAAAAGATGCA  
TGATAACGCATCAAATGCCTTAGGTAAATTAATGGGTTTACAAGCAAAAGATGCGGAAGTTCAAAGAGAT  
GGTAAATTTGTAAAAATTCCACTTGATCAAGTTCAAGTTGGCGACATTATTCGCGTTAAGCCAGGTGAAA  
AAATTCAGTTGATGGTGAGATTCTAGAAGGTGTTACTACATTGGATGAATCAATGGTTACTGGGGAAAG  
TATGCCAGTAGTTAAAAAAGTTGGTGACACTGTTGTAGGGTCAACTATTAATAGTAACGGTACAATCACC  
TTCAAGGCTACTAAAGTTGGTTCTGACACCATGCTTGCTCAAATTGTTGATTTAGTTAAAAAAGCTCAAA  
CTAGTCATGCTCCAATTCAAAGCTTAACGGATAAAATTTCTAATATTTTTGTCCCTGCTGTCATGATTAT  
TGCCATTTAACTTTTATCATTGGTATTCATTCTTGGAGCAACCGCTGTTGAAGCAATGCTTTTTGCA  
GTTAGTGTGATCGTTATTGCCTGCCCATGTGCTTTAGGACTTGCTACTCCAAGTCTTAAATGGTTGGTA  
CTGCTCGTAGCGCTAAAATGGGAGTTTTGATCAAGAACGGTGAAGTTCTTCAAGAAGTTAGTGACTTGAA  
TACTGTTGTCTTTGATAAAACAGGTAATCACTGTTGGTAGACCTGAAGTTACTGATATTGTCGGTGAC  
AAAAACAAGTTTTAAGAATTGCTGCAAGTCTTGAAGAATCATCTGAACACCCGCTTGCTACAGCGATAG  
CTAAAAAGCAGATTCTGAAAAATTACAAATCGAAAAAGTTAGCGACTTTGAAGCAATTGAAGGTAAGG  
CGTTAAGGCTAATTACCATGATCAAACAGCTTTTGTGGAAGCAATCGATTACTAGCCGACGTCAACATT  
TCCCAGGAAATGAATAAGCAAGCCACAAAATTACAGGAAGAAGCTAAAACAGTTGTTTATGTCGGCTTAA  
ATGGTGAAATTATTGGCCTAATTGCTATTCAAGATGTTCTAAACCAAGCTCTAAAGAAGCTATCAGCGA  
ACTTAAGAAACGTGGATTAAAGACAGTAATGCTTACCGGTGATAATGAAAAAGTTGCTCAAGCTATCGCT  
AACGAAGTTGGCATTGACCAAGTTATTGCTGACGTTCTACCAAATGAAAAAGCTGAACATATTCAAGAGC  
TTCAACAAAATGGCGATAAGGTAGCATTGTCGGGGATGGTATCAATGATGCTCCCGCTCTCTCAACAGC  
TGATGTAGGAATTGCGATGGGATCTGGTACAGATATCGCAATTGACTCTGGTGGTATTGTCTTAGTTCAA  
AATGATTTAAGAGGTGTTGTTGCGCTATTGATATTTCAAAGAAGACCTTCAACCGTATCAAGTTAAACC  
TTTTCTGGGCGCTTATCTACAATAACAATTGGTATCCCAATTGCAGCTGGATTATTCGTTGGCTTAGGCTT

TACTCTAAGTCCGGAAGTACTAGCAGGTTTAGCTATGGCTTTTTTCATCTGTTTCAGTTGTTGGTAGTTCATTA

CTTTTGAATAAAGCAAAAATTGCCGGAAGTAAATTAG

>gi|337744364:c6859801-6857372 Paenibacillus mucilaginosus KNP414 chromosome, complete genome\_63

ATGGCTAATGAGCAGCTGCTCGAACAGGAGCAGACCACGTTGAAGATATCGGGAATGACCTGTGCCGCGT  
GTGCGGTCCGGATCGAGAAGGGGCTGAACAAGCTCGAGGGCGTATCGAATGCCACCGTCAATTTTGCAT  
GGAGCAGGCCTCGGTCGCTTATGATCCGGCCAAGGTAGGCACGGAGGCGATCGAGCAGAAGATCCGGGCG  
CTCGGCTACGATACGGTCAAAGAGAAGCTGGAGCTGCAGATCAGCGGGATGACCTGCGCCGCGTGTGCTG  
CCCGTATCGAGAAGGGCCTGAACAAGCTGGACGGGGTCACGAAGGCGACCGTGAACCTTTGCCCTCGAGAC  
CGCCAGGTGGAATATATCGCGGGCCAGGTGAGCCCGCCGAGATGATGAAGAAGGTGGAGAAGCTCGGC  
TACAAGGCGGCTCCGAAGCAGGAGCTGCAGGAAGCGGGAGATCACCGTCAGAAGGAGATCCGCGATCAGA  
AGGTGAAGCTGCTGGTGTCCGCTGTTCTGTCTTTCCGCTGCTGTGGGCGATGGTCAGCCACTTCTCCTT  
CACCTCCTTCATCTGGCTGCCCCGAGATCTTCATGAACCCGTGGTTCAGCTGGCTCTGGCCACTCCGGTG  
CAGTTCATCATCGGCAAGCATTCTATGTCGGCGCCTACAAGGCGCTTCGCAACGGCAGCGCGAACATGG  
ATGTGCTGGTAGCGCTCGGCACGTCGGCGGCTTACTTCTACAGCCTGTACCTGACGGTTCAATCGCTCGG  
CGGGCATGGTCACCACGAGGTTTCAGCTCTATTATGAAACGAGCTCCGTGCTGATCACCTGATCCTGCTC  
GGCAAGCTGTTGAGATGCTGGCGAAGGGCCGCTCCTCCGAGGCGATCAAGACGCTGATGGGGCTGCAGG  
CGAAGACCGCGCTGGTCATCCGGGACGGCCAGGAGATGAGCATTCCGGTGGAGGATGTGCTCACAGGCGA  
GATCCTCATTGTGAAGCCGGGTGAAAAGGTGCCGGTGGACGGGGTTGTCGTGGAAGGCGTATCCTCCGTG  
GACGAATCGATGCTGACCGGCGAGAGCCTTCCGGTGGGCAAACAAGCGGGCGACCCGTCATCGGGGCGA  
CGATCAACAAGAACGGCATGCTGAAGATTCAGGCGACGAAGGTCGGTCGGGAAACCGCCCTGGCCCAGAT  
TATCAAGGTGGTCAAGAAGCACAGGGTTCCAAGGCTCCGATCCAGCGGGTGGCCGACGTGATTTCCGGT  
ATTTTTGTCCCTATCGTAGTGGGCATTGCCCTCGTTACGTTCTGGTCTGGTACTTCATCGTCGAGCCAG  
GCGACTTTGCGAGCGGCCTCGAGAAGGCCATCGCGGTACTCGTGATTGCGTGCCCATGCGCCCTTGGCTT  
GGCGACACCCACGTCGATTATGGCCGGCTCCGGCCGGGCGGCTGAGCTCGGCATCCTCTTCAAGGGGGG  
GAGCACCTTGAGGCCACGCACCGGATCGACGCCATCGTGCTCGACAAGACGGGCACGGTGACCAAAGGCA  
AGCCGGAGCTGACGGACGTTCTGGCGGCTGAGGGGATGGACGAAGCGGCCTTCTCCGCGGTATCGGCGC  
GGCGGAGCGCAGCTCGGAGCACCCGCTGGCGGAAGCGATTGTGGCCGGGATCAAGGAGAAGGGGATCGCC

CTGCCTGAAGTCGAGGCGTTCTGAAGCGATTCCGGGCTACGGGATCCGGGCTGTCGTGGAGGGCCGGGAGT  
GGCTCGTAGGTACGAGGAAGCTGATGGTGAATACGGTGTGAATGCCGAGACGGCGCTGCCGGCGATGAG  
CGGGCTCGAATCGGCAGGCAAAACCGCCATGCTGGCGGCCGTGGACGGTCAGTATGCCGGGATGGTGGCG  
GTGGCGGACACGATCAAGGAGACATCCAAGGAAGCGGTCAGCCGCTTGAAGGCGCTCGGCATCGAGGTCA  
TCATGATCACAGGAGACAACGAACGGACGGCGAAGGCGATCGCGGCCAGGTGGGCATCGACCGTGTGCT  
GGCCGAAGTGTGCCGAAGGCAAGGCGGCCGAGGTGAAGAAGCTGCAGGAGGCGGGCAAGAAGGTAGC  
G

ATGGTCGGCGACGGCATCAACGATGCCCCGGCGCTGGCTACGGCCGACATCGGAATGGCGGTCGGCACCG  
GGACGGATGTGGCGATGGAAGCCGCGGACGTGACGCTGATGCGCGGCGACCTGAACAGCATTCCGGATGC  
GATCGCGATGAGCCGAGGACGATGGCGAACATCAAGCAGAATCTGTTCTGGGCGCTGGCTTACAACGTG  
ATAGGCATTCCTGTGGCCGAGCGGGCTTTCTGGCCCCATGGCTGGCCGGAGCTGCGATGGCGCTCAGCT  
CCGTATCGGTGGTGTCTAACGCGCTGAGACTGCAGCGGGTGAAGCTATAA

>gi|328956382:c2004050-2001603 Carnobacterium sp. 17-4 chromosome, complete genome\_64

TTGACTGAGAAATCATTACCATTGAAGGGATGAGTTGCGCATCATGTGCTCAGACTGTTGAAAAAGCGA  
CTAAGAAATTACCTGGAGTCAAAGAAGCCAGTGTGAATTTGGCTACTGAAAAAATGCATATTCAATACGA  
TGAATCGATTCTGACAGATAAAGATATCCAAGAAGCCGTAAATCAATCAGGATACAAAGCTGTAAGTAT  
AAAAACAGAAAACCTTTACCATTGAAGGGATGACCTGTGCATCATGTGCTCAAACGATTGAAAAAGCAA  
CTGGAAAATTACCAGGAGTAGCAAATGTGAGTGTGAATTTAGCTACTGAAAAAATGAGTATCCAATATGA  
TCCAGATCAATTAGGAGTAGCGGATATTACAAATGCCGTAAAAGAATCTGGTTATGAAGCTCATGAAGAA  
ATTGAATCAGCCGATGCACTAGACATGGATCGTGAAAAAAAAGCACAAACACATAAAAGAGATGTGGCAGC  
GATTTTGGATTTAGCTATTTTTACGGTCCCTTTATTGTACATTTCAATGGGCCATATGTTAGGAATGCC  
ACTACCTGAAGTGATTGATCCTATGATGAATGCGGGCACTTTTTCTTTACTCAATTGATTTTGACTTTA  
CCAGTTGTAATTCCTGGAAGAGAATTTTTAAAGTCGGATTCAAAGCTTTATTCAAAGGTCATCCAATA  
TGGATTCGCTTGTTGCTTTAGGAACGAGTGCGGCCTTTGTATACAGCTTAGCTGCAACTATAGGCATATG  
GATGGGAAATGTTGGCTTAGCTATGGAGCTTTATTATGAATCTGCGGCAGTTATTTGACGTTGATCACG  
CTTGTAATACTTTGAAGCTCTTTCAAAGGGAAAACCTTCTGAAGCAATTAAAAACTAATGGGTCTTG  
CTCCAAAAAAGCTAGGCTGATGCGAAATGGACAAGAGGTAGAAGTAGCAGTCGACGAAGTACAAGTAAA  
TGATTTAATCATCGTGAAACCAGGTGAAAAAATGCCCGTCGATGGAGTAGTGGTCGAAGGAATGACGTCA

GTTGATGAAGCTATGTTGACTGGAGAAAGTATACCCGTTGAAAAACAACCTGGCGATGCGATAATTGGAG  
CAAGTATCAATAAAAATGGAACAATTCAATACAAAGCTACAAAAGTTGGTAAAGATACAGCCTTATCTCA  
AATCATTAAGTTGGTTGAAGATGCACAAGGTTCAAAGCTCCTATTGCGAAACTTGCCGATATTATTCT  
GGATATTTTGTACCAATCGTTATCATACTAGCTATCCTATCAGGAGTAGCTTGGTATCTAGCTGGAGAAT  
CAGGGGTATTTGCTCTGACAATCGCAATTCGGTATTAGTTATTGCCTGCCCTGTGCGCTAGGATTAGC  
GACACCTACCGCTATTATGGTCGGTACAGGAAAAGGAGCCGAATATGGCGTTTTAATTAAGGTTGGCGGA  
GCACTAGAAAAACACATAAAATCGACACGATTATTTTTGATAAAACAGGCACACTAACTGAAGGAAAAC  
CTGAAGTAACAGATATTGTAAGTGTAGTGAGTTATCTGAAGAGAAGTTATTGATTCTTGCAGCTTCTGC  
TGAAAAAGGCTCAGAACATCCACTTGGAGAAGCAATTGTTACGGAGCAGAAAATAAGAAATTGCCTCTT  
CTTAAACGCAAACATTCAATGCTTTGCCTGGACATGGAATTGAAGTAACAATAGAGAATCAATCTCTCT  
TATTAGGAAATAAAAAATTAATGGTCGACCGCGGTATCTCACTTGATGCAGTAGAGTCAATTTCCGATAA  
GTTAGCAAGCGAGGGTAAAACCCCAATGTATATTGCTAAAGATGGTCAAATGGCAGGAATAATTGCCGTT  
GCAGATACAGTAAAAGCGAATAGCTTGAATGCCATTGAAAAATTGCATAAGATGGGATTAGAGGTAGCAA  
TGATTACTGGTGACAATAAACGGACTGCTGAAGCTATTGCCAAACAAGTAGGAATTGACCGTGTGTTAAG  
TGAAGTGTTACCGGAACAAAAGCAAACGAAGTAAAAAATTACAAGCCGAAGGAAAAATAGTCGCTATG  
GTAGGTGATGGTATCAATGATGCTCCTGCTTTAGCACAAAGCTGATATTGGTATTGCCATTGGAACAGGTA  
CAGATGTAGCTATGGAATCTGCAGACATTGTAAGTATGAGAAGTGATTTAATGGATGTACCAACAGCTGT  
GGAATTGAGTAAAGCAACCATCAAAAATATCAAAGAAAACCTATTTTGGGCATTTGGGTACAATGTTTTA  
GGAATTCCTATTGCTATGGGACTGCTCCACATTTTTGGAGGACCATTGTTAAACCCGATGTTGGCTGGAG  
CAGCAATGAGTTTCAGTTCAGTATCCGTAAGTATCAATGCACTGCGTTTAAAGAGATTCAAACCCCTAA

>gi|336065242:c1401683-1399227 *Erysipelothrix rhusiopathiae* str. Fujisawa chromosome,  
complete genome\_65

ATGGATAAAAAGACATATAATATAATTGGGATGATGTGTGCATCCTGTCAAAGCCAAGTCGAAAAAGCAT  
TACAAGGTGTTGAGGGGGTTGATCATGTGGAAGTTAACTTGCTTACCAATCAAGCAGTTGTTTCTTTTCA  
AAGCGACATTCCCGAAGCAGACCTAATCCAAGCCGTTGAAGATCAAGGTTATGGCCTTGAAATCCCAAT  
CCAATTCAAGAAAAACGGTGGATCTAAAACCTACTGACATGACCTGTGCATCGTGTGTTGCGAATGTGG  
AAGGTGCACTCCAACACTTAGAAGGCGTTATGTCCGCTAGTGTTAATTTAATGACGGAACGTGCACGTGT  
GACCTATGACCCTCATAAACTAAAAATGGTGGATATGATCCAAGCCATTGAAAATCAAGGCTATGGTGCT

AGCCGTTTGGATGAAGCTGAAGCGATATCCACGGATTCTCAAAAACACCAAGATCAAAAAGAGAATCGTG  
CGCTTTACTTTAGTTTAATCTTAGCTGCAACCATGCTCTATATTACAATGGGTCAAATGTTTACCTATAA  
ACTACCCTTACCATCCTTTATCGATCCTGATATTAATCCTTTGAACAATGCGCTCTTACAAATTGTTATT  
ACCATCCCCATTGTTTGGTTAAATCGTGATTACTTTAGAAGAGGCTTTAAAACATTATTTAAAGGGCATC  
CTAATATGGATTCTTTAGTAGCGATTGGAACCGGTAGTGCAATGCTTTACAGTTTCTATGGATTCTTCAA  
AATTTTAAATGGAGAACCTCATTTTGTACATCATCTCTACTTTGAGTCTGCAGCGGTGATTTTAGCGTTG  
ATTCTGCTGGGAAAACCATGGAGTCTCGCAGTAAAGCGAAGACCACCAGTGCCATTAAAGCATTATTA  
ACCTTAAACCAGAAACGGCACTTTTGATTCTGAGGATGGTGTGTGGAAATTGATGCGGATGAAATCCG  
AATTGGTGATCATCTGCTGGTAAAACCAGGTACATCCATTCCAATGGATGGTCGAATTTTAGAAGGTGAA  
AGTGCGGTGATGAGTCGATGTTGACTGGAGAAAGTATTCCAGTTGATAAAACGCGCGATGATGATGTTG  
TGATGGGGACGATGAATCTTAACGGTCGTCTTGTCATCGAAGTGACCGTTGATGATCAAAATACAAAGCT  
TGCACAAATTATTCGTTTGGTTGAAGATGCGCAAATGAAAAGGCGCCATCTCTAAAGTAGCGGATAAA  
GTAGCGGGTGTGTTTGTCCGGTGGTAATGGTCATTGCGCTTATTTCTGGAATTTTATGGTTTATCGCTA  
CCAAAGATCTAGAACGTGCTCTCACCATTTTCGTAACGGTACTCGTTATTGCTTGCCATGTGCACTTGG  
ACTTGCAACGCCAACGGCCATTATGGTCGGAACCGGAGTGGGCGCACAAAATGGAATTTTTATTAAGTCA  
GCAGAAGCATTAGAGGCTGCGGCTCATATTGATACTGTTGTTTTCGATAAAACAGGAACCTTAACACATG  
GGAAACCTGTTGTGACGGATATCATCACGAACTTGCTGAAAATGAATTCTTAACTATTGTGGGTTCACT  
TGAAAATGCTTCTGAACATCCCTTAGCACACGCGCTTGTTTCGGAGTTAGAAGAGCGAAATCTAGATATT  
TTAGCCATTGATTCATTTAAATCAATCTCAGGAAAAGGTCTTCAAGGAAGTGTGGTGGAAAATCCATTG  
CAATTGGAAATGAAGCGTTGATGGATTGTTAAATATTTCTACAGATCGTTATGAAGCGGATGTGAAACG  
TTTATCTCAAGAAGGTAAAACGGCTATGTATGTTTCTGATCAAACAGCATTAAATGGGGATTGTTGCAGTT  
GCGGATACCCTTAAAACCTGAGTCGATTGAAACCGTAAAAGTATTACAAGATATGAACTATGATGTCATCA  
TGCTTACTGGTGATCATCGTGATACGGCACATGCAATTGCCGATCAAATTGGCATCTACCATGTTTTAGC  
AGAAGTGATGCCTGAAGAAAAAGCCGCAAAAATTAAGAACTTCAAAACCAAGGTCAAATGTCTTGATG  
GTTGGAGATGGAATTAATGATGCGGTGCGCTTGTTCAAGCCGATGTAGGGATTGCAGTCGGTACGGGAA  
CGGATGTAGCGATTGAATCTGCGAAAATTGTGCTCATGAAAGACAATTTGAAAGATGTTGTGAATGCACT  
GGCCTTAAAGTAAAGCAACAATGCGTAATATTAACAAAACCTTATTCTGGGCATTTGCGTATAATGTTGTC

GGAATACCATTTGCAGCGGGTCTTTTTAAAGTCTTATTCCAAGGTCCACTTCTTGATCCAATGATAGCCG  
GTGCCGCAATGGCACTAAGTTCGTAAGTGTGTTCAAATGCATTGCGTTTACGTGCTTTAAGATTAA  
AATATAA

>gi|448819523:c2952775-2950850 Lactobacillus plantarum ZJ316, complete genome\_66

ATGAGCACGACGAAACGGTTTTGGATTCATTAATATTTTCCCTGCCACTACTGGCCAATATGATTTTGA  
TGCCCTTTGGCTGGATGCTTCCGGGTGGTATTGGACGCAGTTGATTCTGACGACCATCATTATGGCTGT  
TTCGGCTCGGCCGTTCTTGCAAAGTTCGTGGGCGTCTTTACTAAGCACCATGCCAATATGGATACTTTG  
GTGGCGATTGGCACCGCGACGGCTTATTTTTACAGCTTATACGCAATGGCAACGGGGCAAGCAGTCTTCT  
TTGAAAGTGCCGCACTTGTGACCACTTTCGTTTTGCTCGGCCAAGTCTTTGAAGAACGAATGCGGCACAA  
CGCGTCCAGCGCGGTGCAAAGCTAGTGGGCTTACAAGCCAAGGAAGCGGAAGTGTTACGCAATCAAGAA  
TTTGTAAGTACCGTTGGATCAAGTAGTGGTCGGCGACATTATTCGGGTCAAGCCAGGCGAAAAAATTC  
CCGTTGATGGTGTAAATTACAACCTGGCCGCTCAACGGTTGATGAGTCAATGGTGACGGGAGAAAGTATGCC  
GGTTCAAAAAACGGTGGCGGACGCTGTCATTGGTTCAACGATTAATAGTAATGGGACCTTTCAGTTCAA  
GCTAGCAAGGTCGGTGACCAGACAATGCTGGCTCAAATCGTTGAGCTCGTTAAAAAAGCACAAAACAGTC  
ACGCACCGATTCAAAGCTGACCGATAAAGTTTCTGATATCTTTGTGCCGATTGTGCTAATTATTGCTAT  
CGTTACCTTCTTGACCTGGTATGTTTTCTGAATGCTAGTCTCGCGAATGCCTTGATTTTTGCGGTGCGT  
GTGGTCGTGATTGCCTGCCCGTGTGCGCTAGGTTTAGCTACGCCGACCGCACTAATGGTCGGTACCGGCC  
GTGGTGCCAAGATGGGGATCCTGATTAATAATGGTGAGGTCTTGGAAGCTGTCAATGACGTTAAAACGGT  
GATCTTTGATAAGACGGGAACGATTACGGTTGGTCACCCACAAGTGACCGATGTTATCGGCGACGAAGCC  
CAAGTACTGCGCGTTGCCACTAGCTTAGAGGCGGCTTCGGAACATCCTTTAGCTGCGGCAATATTA  
GCGGCACGGCCCGTGGTATTCAAGCACCAACCGCCACGAACCTTCCAAGCCATCGAGGGTAAAGGTGTGAC  
TGCTCAAGTTGAGGGCCAATTAGCGGTGGTCGTAATCATAAATTATTAAGTATGAGCCGATTAGTGCT  
GAATTACAACGCCAAGCCACTGAGCTTCAGGACGCGGCGAAAACGGTCGTGTACGTGGGCTTAAATCAGG  
AAATCATTGGATTGATTGCCATTCAAGACGTCGCCAATCGACGTCTGAGGTAGCCATTGCGAGTTTGAA  
AGCACGTGGCTTGAAGACGGTCATGTTAACCGGCGATAACGAACGGGTGCGACAAGCTGTGGCGGATCAA  
GTCGGTATTGATGAAGTGATTGCTGATGTGCTGCCAGGTGATAAGGCTGATCACGTTACGCGTTCCAGA  
AGGCTGGCAAGGTGGCCTTTGTCGGCGATGGTATTAATGACGCCCCCGGTTGACGACGGCGGATGTTGG

GATTGCCATGGGTTCCGGAAGTATGCAATCGATGCTGGTGGCATCGTGCTCGTTAAGAACGATCTG  
CGTGATGTTGACCGGGCGTTGGCATTGAGTAAGAAGACGTTTAACCGTATCAAACCTAATCTGTTCTGGG  
CTTTCGTGTACAACGTGCTCGGGATTCCAGTCGCGGGCGGCCTTCTTTGCCATTGGGCTGACGCTTAG  
CCCCGAATTGGCCGATTAGCAATGGCCTTTAGTTCATTGTCCGTAGTCACGAGTTCGGTATTGCTAAAT  
AAAGCTAAGATCAGTTCGAACGCCAACCTGCGTAG

>gi|448236310:817551-819947 Geobacillus sp. GHH01, complete genome\_67

ATGGGAGAGCCGAAAACCGTGACGCTGAAGGTGACGGGCATGACATGCGCCGCGTGCGCCAATCGGATTG  
AGAAAAGTATTAATAAGATGGACGGCGTCAAAGCCCATGTCAATTTGGCCATGGAAAAAGCAACGATTCA  
ATACGATCCATCAAAAACAAACGATCGCCGATATCGAAACGAAAATTGAGAATTTGGGGTATGGCGTTGCG  
ACGGAAAAAGTGACGCTTGATATTGAAGGAATGACATGTGCGGCCTGTGCGACGCGGATTGAAAAAGGGT  
TAAATCGGATGGAAGGTGTGACAAGCGCTGCTGTCAACTTGGCGACAAACAGCGCGGTGGTCAATACAA  
GGAGGGTGTTCATCTGTGCAAGACATTTTAGAGAAAATCAAAAAGCTTGGGTATAAGGGGCAAATTCGA  
AACGAAGAACAAGACGATGCTGGCCGAAAGAAGAGCGGCTGAAACAGAAGCAACGGCAACTCGCCATTT  
CCATCATCTTATCGTTGCCGCTGCTTTATACGATGCTGGCTCATATGCCGTTTGATATCGGCTTGCCGAT  
GCCGCAGCTCTTGATGAATCCGTGGTTTCAGCTTCTTTAGCTACACCCGTTTCAGTTTTACATCGGCGGT  
CCTTTCTATGTGGGGCGTACCGGGCGTTGCGAAACAAGAGCGCGAACATGGACGTCCTAGTGGCGCTTG  
GAACATCGGCCGCGTACGTTTACAGCTTGTACGAAGCTTTTCGGACACTTGGGAATCCTGACTATATGCC  
AAGACTGTATTTTGAACAAGCGCCGTCTTGATTACGCTTGTGCTTGTGCGCAAATACTTTGAGGCTCTT  
GCGAAAGGGCGGACAACCGAAGCGATCTCGAAGCTAGTCAGCCTGCAGGCAAAGGAAGCTACTGTCATCC  
GTAATGGGGAAGAAAATAAAAGTTCCGCTCGAGGAAGTGGTGATCGGCGATACGATCGTTGTCAAGCCAGG  
AGAAAAAATTCCGGTAGACGGTATGGTCATCGCCGGAGCATCTTCCGTAGACGAATCGATGATTACCGGT  
GAATCGATCCCGTTGATAAAAAGGAAGGCGACTATGTGATCGGGGCGACGATGAATACGAATGGCGTAC  
TGACCATTGTCGCCGAAAAAGTCGAAAAAGATACCGCGCTGGCCAATATCATTAAAATCGTTGAAGAGGC  
GCAAGGGTTCGAAAGCCCCGATTCAGCGGATGGCGGATACCATTTCCGGCATTTTCGTACCGATTGTTGTC  
GGAATTGCGGTTGTTTCCTTTCTAATCTGGTACTTCTTCGTTGCGCCGGGTGATTTGGCCAAAGCTCTTG  
AGGTGGCCATCGCTGTTCTTGTATCGCGTGCCTTGTGCGCTCGGTTTGCCACACCGACATCGATTAT  
GGTCGGTACAGGAAAAGGGGCAGAACAAAGGAATTCTCTTTAAAGGAGGTGAGTACCTAGAGGGAAACGCAT

AAAATCAATGCCGTATTACTCGATAAAACAGGAACCGTGACAAAAGGAAAACCGGAAGTCACCGATGTGC  
TAGCCTTCCGCGAGGACATGCTCGATTATGCGGTTTCCGCCGAGAGCGCTTCGGAGCATCCGCTGGCTCA  
TGCGATTGTTGAATACGGGAAGAAACAAGCGATTTTCGATGAAGCCATTGGAGCACTTCTCCGCCATTACC  
GGCCACGGAATTGAAGCTGTCATTGACGGAAAAAGCATCCTTATTGGGACGCGAAAATTGATGAAGGAAC  
GCTCTGTAGCGATTTCTGTGCATGAAGATAAAATGGTAGAGCTTGAAAAACAAGGGAAAACAGTGATGCT  
CGTTGCCATCGATGGACAGCTTGCCGGCATCATTGTTGTCGCGGATACGGTGAAAGAAAAGCTCGAAAGAA  
GCGATTCAAACATTAACAACAATGGGCATCGATGTCTATATGGCAACAGGGGACAATCAACGGACAGCGG  
AAGCGATCGCCAATGAAGTAGGCATTGAGCATGTGTACGCCGAGGTGCTCCCGGAAAACAAGCGAACAT  
CGTCGAGGAATTGCAAAAGCAAGGAAAACGTGTGGCGATGGTCGGCGATGGGATTAACGACGCTCCAGCT  
CTGGCAAAGCGGATATTGGGATGGCGATTGGCACAGGAGCTGATGTCGCCATCGAGACCGCTGATGTGA  
CCTTGGTCGGCGGCGATTTGCGCCATATCCCGAAAGCCATTGAGTTGAGCCGCAAAACGATGAAAAACAT  
TCGGCAAAATCTGTTCTGGGCGTTGTTTTATAATACGATTGGCATTCCGGTCGCCGCTTTCGGATTATTG  
GAGCCATGGATCGCTGGAGCGGCGATGGCATTACGCTCTGTGTGGTTGTGCGCAACGCGCTTCGTTTGA  
AACGCGTGAAACTATAA

>gi|508605261:c3180599-3178383 Carnobacterium maltaromaticum LMA28 complete genome\_68

ATGAAAAATACACAAAAAAGCAAACAACGATGGAAACTTTAGCAATTACAGGAATGACCTGTGCGAATT  
GTTACAAAACAATTGAAAAAACATTAATAAAGAATCTGGGATTACATTAGCTAACGTCAATTTAGCAAC  
AGAAAAAGCCACAGTTACCTATAATCCTGCAGAAACAACATTACCAAAAATTATTAAGTATTGAAGCT  
GCAGGGTATGGAGCAATTGTCTACGATGAAGAGCACCAAAAAGAAGTGGCTGCGTTAAAAGAGAAGAAGA  
GTCAAAGATTAATAATTGATTTTATAGTTAGTGCTATTTTAAGTGCTCCAATGGTTATCTCAATGATTTT  
TATGTTGGTAGGGTGGCATAATCCGATTACAGGTTTCTTTGAAATTCCGGTTGTTGATTTATTCTAGCT  
ACACCTGTTCAATTTATTATTGGTTGGCGTTTTTATAAAGGAGCATACAAAGCGATTAAGCGGCTTCTC  
CTAATATGGATGTTTTAGTTGCAATGGGAACAACGGCTGCATATGCTTTGAGTATTTATAATGCTTTTAT  
TGCTAACCGTCCCATGATTTGTATTTTGAAGTAGTGCTGTGATTATTACGCTGATTCTACTTGAAAAA  
TATTTAGAGCACAAATGCTAAAAATAGAACAGGATCTGCTATCAAACAATTAATGGCGTTGCAAGCTAAAA  
CGGCTGTCGTTATTCGAGATGGTGAAGAAATTACAGTACCTATTGAGTCTGTTGAGTTATATGATTTGAT  
TCGAATTAACCAGGTGAACAGATTCCAGTAGATGGTAAGATTATTGAAGGAACAACCTTCGTTAGATGAA



AGTATGCTGACAGGGGAAAAGTTTACCGGTAGAAAAACAGTCGATGATACTGTTTTGGCGGGACTGTAA  
ACACGAATGGAACGTTAGTCCTTCAAGCGACTAAAATTGGAAGCGAGACAGCTTTATCGCAAATTATTCG  
AATGGTGAAGAAGCGCAAGGCAGTAAAGCGCCGATTCAACAAATTGCCGATCGAATTTAGCAATATTC  
GTACCAATTGTGTTAGTCGTTGCTTTAGGTACTCTGATTGTTACCGGTTGGTTAACGGGTGATTGGGAAT  
TGGCTTTGATTCATAGTGTGGCTGTTTTAGTTATTGCTTGTCTTGTGCGCTAGGCTTAGCAACACCAAC  
TGCGATTATGGTGGGAACCGGCTTAGGAGCAAAAAATGGAATTTTGATTAAAGGTGGCGAAGCTTTAGAA  
GGAGCTGCTAAAATTCAGGCCATTATTTTAGATAAAACTGGAECTATTAATAAGGAAAACAGAAAGTAA  
CTGATTATGAAGTGCTACCAGGTGAAAATTCTGAGGAACTATTAAGTTTTATTATGGCTTTAGAGAAAA  
TTCGGAACATCCTCTGGGTAAAGCTATTTATAACTATGGCAAGAAAAAATTGAATGGTGAAGAGCAGACT  
GTTGAGAACTTCAAAGCGTTGGTTGGATCTGGAATTTCTGGTGATATTAAGGCGAAACTATGTACATGG  
GTGCGAAACGTTTAATGGATGAAAATCATAGTGATTATTCGCATTTTTCTGAAAAAATTACAGCATTAGA  
AGGTAGCGGGAAAACGGCTATGCTTTTTGCAAAGGTGATCAATGTGTGGCTATGATTGCAGTGGCAGAT  
CAAATTAAGAAACATCTAAAGAAGCAATTCAAAAATTAACAAATGAACGTGGAAGTCTATATGTTGA  
CTGGGGACAATCGTCTGACTGCTGAGAGTATCGGAAGCGAAGTTGGAATTGATGCTGCACATTTTTTGC  
AGAAGTATTGCCTGCAGATAAGGCAAATCATGTCGTATCTCTTCAAGAAAAGGTTTATCTGTTGCAATG  
GTAGGGGATGGAATTAATGATGCTCCTGCTTTGGCAACTGCAAATGTTGGTTTAGCGATGGGAACAGGAA  
CAGATATTGCCATGGAAGCAGCAGATATTACCTTAATGAATGGCGATTTAAATAATATTCCTAAAACGAT  
TCATTTATCAAAGTTACATTGCGAAAAATTAACAGAATTTATTCTGGGCGTTTATTACAATACAATT  
GGAATACCATTTGCCGCTATTGGCTTATTAACCCAATCGTTGCTGGAGGCGCAATGGCCTTTAGTTCGG  
TTAGTGTATTGTTAAATTCTTTAGCTTTAAATCGTACGAAAGTTTAA

>gi|409131816:c2096979-2094421 Thermacetogenium phaeum DSM 12270 chromosome, complete genome\_69

ATGTTACCGGGGGTGAACGTCATGGAAAACGGGGCGGAAAGAGCAGGGCCCGCCGGGTGACTTTGCCCG  
TACGGGGTATGACCTGTGCGGCGTGTGTCGCCAGGGTGGAAAAGACCCTGAAAAACATCCCGGGAGTGGA  
GGGAGCCCGGGTGAACCTGGTAGCCGGGAAGGCTGCTGTGGATTACCTTCCGGAGCGGGTGAGCGTGCCT  
CAAATGGTCAAGGCCATCCAGGAGATCGGCTACGAAGTACCGGAGGAAGAGGTGCTCTTGACCGTTCGGG  
GTATGACCTGCGCTGCCTGTGTGGCCCGGGTGGAAAGAACTTTAGAGCTCTGCCGGGAGTAACGTCCGGT  
GGTGGTCAACCTCCCGGCTGAGTCGGCAAAGATCCGGTTCTACCCGGGTGCCGTTGACAAATCCCGCATC

AAGCAGGAGATCAATGCCCTTGGTTACGAGGCTTCGGAAAAGCTGACGGGTGACGAGGCACTCGACCGGG  
AGAAAGAGGCCCGGGAACGGGAGATCAGGTACCAGCGGCGCAATATGTGGATCGCCTGGCCGTTGGCGAT  
TCTGGTTATGGTGGGCATGTTCCGGGATATGTGGATTTTCCCGTACTTTGTACCAAATTCCTGGGCAAC  
GTCTATGTGCTTTGGGCCCTGACCACACCGGTAGCCTTCATCCCCGGCTGGCAGTTTTTCGTGCACAGCT  
GGAACGGTCTGAAGCGGGGTACCACCGACATGAACCTCCTTTATGCCACAGGTATCGGCGCCGCTTACCT  
GATAGCTACAATCAATACCCTGTGGCCCAATGCGGGTTTTCGGCGGCCGTGGCGCGACCTTCTTTGAGTCG  
GCCGCCCTGCTGACAGCCTTATCGTGCTCGGGCGCTACCTGGAGGCCCTTACCCGCGGCCGGACTTCCG  
AGGCCATCAGGAAGCTGATGAGCCTGCGGGCCAGAACCGCATTGGTTGTCCGGGACGGCCGGGAGATCGA  
GATTGCAGCCGATGAGGTAGAGGTGGGGGACATTGTAGTGGTTCGTCCCGGCGAAAGCATCCCGGTGGAC  
GGGAAGTGATCGAGGGTTATTCGGCCGTGGATGAATCGATGATTACCGGCGAAAGCATCCCTGTGGAAA  
AACGCCCTGGCGCCAGGTGATTGGAGCGACCATCAACAAGACCGGCTCTTTCAAGTTCAGGGCTACCCG  
GGTGGGGAGCGAGACGACTCGCCAGATCATCAAGCTGGTGGAGGATGCCAGGCGTCCAAGGCACCC  
ATTCAAAGGCTCGCCGATTTTGTGGCAGGTCATTTCAATGCCGGGGTCCATGTCCTGGCCCTCCTTGCT  
TCCTGTTCTGGTTCTTTATAGGCTATAACGCTTCTTCTGCCCAGCCGCTTCATCCTCTCGCCCTT  
TAGCCTGGCCAGGTGGGCGTCTTCGGGTTCTCCCTGCTGTTGTCGGTAACCACCCTTGATTTCTCTGC  
CCATGTGCTCTCGGGTTGGCCACTCCAGTGCGGTCATGGCCGGGACGGGCAAGGGCGCCGAAAACGGGA  
TCCTCTTTAAAGGCGCCGATGCGGTTGAGGAGAGCAGCAAGCTGAATGCTATAGTCTTTGATAAAACGGG  
GACCTTGACCAAAGGGGAGCCTTCCGTACCGATATTATTGCAGCGGAGGGGTTGATAAACAAGAGGTT  
CTGAGGTTGGCCGCCATGGCCGAAAACCGTCCGAGCATCCCCTTGGGGAGGCCATTGTCCGCGGAGCCC  
GTGACGAAGGCCTTGAGATCGAGGATGTTCCGGACTTTGAAGCCGTTCCGGGCCACGGCGTGGGGCCGT  
GTACCGGGGGCGGGAGATCCTTTTGGGCAACCGCCGTTTGATGCAGCAGAGAAACATCAACATAGGTGAC  
CTGGCAGCCCGGATGGAGGAACTGGAAGAGGAAGGCAAGACCGCTATGTTGCTGGCCGTTGACGGTAAGG  
CCGCCGGTGTGATCGCCGTGGCCGACACTCTCAAGGAAAGCACAAAGGTGGCGGTAGAGCGCCTGCAGAA  
AATGGGCATTCAGGTGGCCATGATTACCGGAGATAACCGCCGCACGGCCGAGGCCATTGCCCGGAGGTT  
GGGATCAAGACCGTGCTGGCCGAGGTGCTGCCCCAGGACAAGGCCGAAGAAGTTAAAAAGCTTCAGGAAA  
GAGGGCTCAAGGTGGCCATGGTGGGTGACGGGATCAACGATGCTCCGGCCCTGGCCAGGCGGACGTGGG  
GATTGCCATCGGCTCCGGAACCGATGTGGCAAAGGAGACGGGGGACATTATCCTGATCAGGGATGACCTT

CGCGATGTGGTGGGAGCTATCGAAATCGGCAGAGCGACCATGGGGAAGATCAGGCAGAACCTGGTATGGG  
CTTTCCTGTACAACGCCCTGGGGATTCCCATTGCCGCCGGAGTCCTGTATCCCTTCACCGGGCTCATCGT  
CAGCCCCGAACTGGCAGCCTTTTTTATGGCCATGAGTTCGGTATCGGTAACGTTAAATACGCTCCTTTTA  
AAGCGTTCCGGCCTTCCCTCCGGGAGAGGCCTGTGTAG

>gi|407475894:c256770-254644 *Exiguobacterium antarcticum* B7 chromosome, complete  
genome\_70

ATGTCGAAAACGATTGAACTGAATATCGAAGGCATGACCTGTGCTGCCTGTTCCGCACGGATCGAAAAAG  
TCTTGAACCGGATGGACGGTGTGAAGCGACCGTCAACTTACCTCTTGAGACGGCACGGATTGCGGTACC  
GGACGAGATGGAAGAACAGGTGATCCTTGATAAAATCAAAAAAGTCGGTTACGGTGCGACACTCAAGACG  
ACGCCCCACGAACAGGTTCAAATCGTCGGATGCTCTATCGGTTTTTTCATCGCTGCGTACTGTGCTTAC  
CCTTGTTACTCAGCATGGTGTGCGCATATCCGAACAGTCCGCTTCATCTGCCTTTCCTGATGAATCCGTG  
GCTTCAATTTGCACTTGCACACTGTCCAGTTCATCATCGGGGCCCCCTTCTACAGCGGTGCCTATAAG  
AGTCTCCGCAGCGGCAGCGCCAACATGGATGTTTTGGTCGTA CTGGA ACTTCCGCGGCTTATTTCTACT  
CGATTGCAGAAATGCTGATCCATCCGCTCATGCCAAATCTCTATTTTGAGACAAGTGCCGTCTGATTAC  
GCTTGTCTTTTTGGGAAAAGTGTTAGAAGATCGGGCCAAACAACAAACGACCGGCGCCATCAAAGTCTT  
CTTTCCTTACAGGCGACCGATGCTGTCGTA CTGGA ACTTGAAGACGGCATCGAACGGAAAGTCTCGATGGAGCATG  
TCCAAGTCGGGATGCAACTCGTCGTTAAACCCGGACAAAAAATCCGGTTGATGGCGTGATCGTCTCTGG  
AGACGCCTATCTCGATGAATCGATGTTGACCGGTGAACCGCTTCTGCTCATAAACTGTTTCATGACGCT  
GTCATCGGAGGGACGTTAAATACGAATGGTCATCTCCTGATTGCAGCGACCAAAGTCGGTCAAGAGACGA  
TGCTTGCGAACATCATCCGGGTCGTCGAACAGGCGCAAACGGAAAAGGCACCGATTACAGCGACAAGCAGA  
CCGAATTTCTGGTATCTTCGTTCCAATCGTCGTCGCCATCGCCATCGTGACACTTGCTGTTTGGTGGTGG  
ACGACCGGCTCGTTTGCCGAAGCCATCCGGCCGGCGATTGCCGTGCTCGTCATCGCCTGTCCGTGTGCC  
TTGGACTTGCGACACCGACCTCGATCATGGTCGGAACGGGTAAAGGAGCAGAACACGGCGTACTGTTCAA  
AGGTGGTGCCAGCTGGAATCGTTACAACATGTCGATGCCGTGCTCTTTGATAAGACAGGTACGTTGACG  
ATTGGCCGACCTGTCGTCGTGCAAACGTTCCGGACAGGAACAAGCACTCGATTTTTCGGCAGCCATTGAAA  
AAAAATCAGAACATCCCCTTGCCCATGCAGTCACGGAAGAACGAGATGTCGTCTTTGATATTGAAGACTT  
CACCGTCGATGCCGGACGTGGTGTCCGCGGAACGATTTTAGGACATCACGTGATGGTCGGTTCAGCACGG  
ATGATGCGTGAGCATGAGCTGATTCTCCCCGACTGGACTTCCACTGGTGCGACGTTCTGCTATGTTGCGG

TCGACGGACAGATCGAAGCCGGTTATGCGATTCGGGATGAACTCAAACCAACAACGAAACACGTCATTCA  
AGAGCTTCAGCAAATAAGCGGTCTATCTGTTGACGGGCGACCGACAAGAAGTCGCCTTGGAGCTCGCA  
CATGAACTTGGTATTCCGCAGACACAGGTCTTTGCCGATGTGTTACCGATTGAAAAAGCAGATAAAATCA  
AAGCCTTACAAGCAACGGGTCAACGGGTGGCGATGGTCGGCGATGGCATCAATGACGCACCAGCCCTTGC  
GACAGCAGATGTTGGGATTGCGCTTGGCAGCGGGACAGATGTCGCACTTGAAGCGGCAGATGTCACCCTG  
CTTGGACATGATCTGCAACAAGTCGCAACAGCCATCCGCTTAAGCGAGCAGACGATGAAAAACATTGCTC  
AAAATCTGTTTTTGCCTCGGCTACAATACGATTGGAATCCGATTGCTTTCCTCGGACTCCTTGCCCC  
ATGGGTCGCAGGTGCCGCGATGGCCTCAGCTCTGTATCTGTCTGCACAAATGCGTTACGCTTAAAACGT  
ATTCCATTATCCAAAGGAGGAAAATGA

>gi|392987295:1790883-1793066 Enterococcus hirae ATCC 9790 chromosome, complete  
genome\_71

ATGGCAACGAATACCAAAATGGAAACATTTGTCATTACTGGAATGACATGTGCGAATTGTTCTGCTCGAA  
TCGAAAAAGAACTAAATGAACAACCTGGTGTGCATGTCTGCTACTGTCAATTTAGCCACTGAAAAGGCAAG  
TGTGAAATATACCGACACTACTACAGAAAGATTGATCAAAAAGTGTGAAAATATCGGCTATGGGGCAATT  
TTATATGACGAAGCGCATAAACAATAAATTGCTGAGGAGAAACAACCTATTTAAGAAAAATGAAGTTTG  
ATCTTATCTTTAGTGCATCTTGACTCTACCCTTGATGTTAGCAATGATTGCCATGATGCTTGGAAAGTCA  
TGGACCAATTGTGTCGTTCTTCCATCTGTCTCTTGTGCAGTTGCTCTTTGCTTTCCTGTGCAATTTTAT  
GTAGGTTGGCGCTTTTATAAAGGAGCCTATCATGCATTAATAAATAAAGCGCCGAATATGGATGTCTTAG  
TTGCGATTGGAACATCTGCAGCCTTCGCATTAAGCATTATAATGGTTTTTCCCTAGCCATTCCCATGA  
TCTTTATTTGAAAGTAGCAGTATGATCATTACCTTGATTTTACTTGGAAAGTATTTAGAACATACAGCA  
AAAAGTAAAACAGGCGATGCCATCAAACAGATGATGTCCCTTCAGACAAAAACAGCACAAGTTTTAAGAG  
ATGGCAAAGAAGAGACGATTGCAATTGATGAGGTCATGATCGATGACATCTTAGTGATTTCGTCTTGGTGA  
ACAAGTACCTACAGATGGACGGATCATTGCTGGCACTAGTGCATTGGATGAAAGCATGTTGACAGGAGAA  
AGTGTACCTGTTGAGAAAAAAGAAAAAGATATGGTTTTTGGTGGAACGATCAATACCAATGGATTGATCC  
AAATACAAGTTTCTCAGATAGGAAAAGATACGGTGTGGCACAATCATCCAATGGTGGAAAGATGCTCA  
AGGAAGTAAAGCACCGATCCAACAAATTGCTGACAAGATTTACGGGATTTTCGTACCGATCGTTTTGTTT  
TTAGCATTGGTGACACTATTAGTTACAGGATGGCTCACGAAGGATTGGCAGTTAGCATTGCTTCATAGTG  
TGTCCGTTTTAGTCATTGCTTGCCATGTGCGCTTGGTTTAGCAACACCAACTGCCATCATGGTAGGAAC

AGGGGTCGGTGCTCATAATGGGATATTGATCAAAGGTGGCGAAGCGTTAGAAGGAGCCGCTCATCTAAAT  
AGTATTATTTGGATAAACTGGAACGATTACACAAGGCCGACCAGAAGTAACAGATGTCATCGGTCCCA  
AAGAGATCATTTCCCTTTTCTATTCCCTTGAACATGCTTCTGAACATCCTTTAGGAAAAGCTATTGTTGC  
TTATGGTGCAAAAAGTCGGTGCAAAAACCTCAGCCAATCACTGATTTTGTGCTCATCCTGGTGCAGGAATC  
AGTGGAACGATCAACGGTGTTTATTATTTGCTGGGACTAGAAAGAGACTAGCTGAAATGAACCTTTCAT  
TTGATGAATTTCAAGAACAGGCGTTAGAATTAGAACAGGCAGGGAAAACAGTGATGTTTTTAGCCAACGA  
AGAACAGGTTCTTGAATGATTGCCGTTGCTGATCAAATCAAAGAAGATGCAAAAACAAGCAATCGAGCAA  
CTACAACAAAAAGGTGTCGATGTGTTTATGGTTACGGGAGATAATCAACGAGCCGCTCAAGCAATCGGCA  
AACAAAGTAGGAATTGATTCCGACCATATCTTGCAGAAGTTTTACCTGAAGAAAAAGCCAACCTATGTAGA  
AAAACCTACAGAAAGCTGGAAGAAAGTTGGCATGGTCGGTGATGGAATCAATGATGCCCCAGCGCTAGCT  
TTAGCAGATGTTGGGATTGCAATGGGAAGTGGAAACCGATATTGCGATGGAAACAGCTGATGTGACATTAA  
TGAATAGTCATTTAACTTCTATCAATCAAATGATTTCTTATCAGCTGCCACATTAATAAAAAATCAAACA  
AAATTTGTTTTGGGCATTCATTTATAATACGATCGGGATTCCTTTTGTGCTTGGTTTTTAAACCCA  
ATCATTGCTGGTGGCGCAATGGCCTTAGTTCAATCAGTGTATTATTGAATTCTTAAAGCTTAAATCGAA  
AAACGATCAAATAA

>gi|384133787:390174-392552 Alicyclobacillus acidocaldarius subsp. acidocaldarius Tc-4-1  
chromosome, complete genome\_72

ATGTCAGAAACCCGCGAATTGACGTTGCCTATCGAAGGCATGACGTGTGCCGCTGTGCGGCGCGGATCG  
AGAAGAACCTGGCGAAGCTGCCGGGCGTGCAGCAGGCGAACGTGAATCTCGCGTCCGAGCGGGCCCCGCGT  
GGTGCTGACCTCCAACACGCCGTGGACCGAGGTGATCGACAAAATTGAAAAGACCGGGTACTCGGTCCCCG  
CTGCGCGAGGTGGACCTGCGCATCACCGGCATGACGTGCGCCGCGTGC GCGGCGCGGATCGAGAAGGTGG  
TCGGGCGCCTGGACGCGGTGAAAGAGGTAAGCGTCAACCTTGCCTCGGAGAAGGCGCGGGTGGCGTATGT  
GCCGGGCGTGATCGAAGTCGAGGATATCATTGCGCGGGTGGAGAAGGCGGGCTACGGCGCGGCGCTTGCG  
AGCGAGGTGGAGGCGGAGGAAGAGGCGCGCAAGCGGCGGGCGTATCGGCGGATCTCGCCACGTTGCCCC  
TGTCCGCCCTGCTCACGCTGCCGCTCGTCGTCCAGATGTTTGTGCTGCTCGCGGGCGGGCGCCCCGTTTCT  
TCCGAACTGGGCCGCTGGCTTCTCGCGACGCCGTCAGTTCCACGTGGGATGGCGCTTCTACAAAGGG  
GCGTACCACGCGCTGCGCGGCGGCGGCGCAACATGGACGTA CTGTTGGCGCTCGGCACCACGGTGGCGT  
ACGTGTTTACGCGCCGTTCTGACGGTGGAGGGGCGCCGGGACGTGTACTTTGATAGCTCCGCCACGGTCGT

GACGCTCATCTTCATGGGCAAGCTGCTCGAGGCGGGGCGAAGGCGAGATCGAGCGGGCCATCTCGTCG  
CTCGCGAAGATTGGGGCGAAGGTGGCGCACGTGCTGCGGGACGGCGAGGAGGCGGATGTGCCGTTGAGG  
CGCTTGCGGTGGGCGATCTCGTCCGCGTGAAACCGGGCGAGCGGGTGCCTGCGGACGGCGTTGTGGTGGA  
AGGATGGACGAGTGTGACGAGTCGTTTTGACCGGCGAGCCGCTGCCTGTGACCAAGCGCCCGGGCGAT  
GAGGTGGTGGGCGCGTCCCTGAACCAGGCGAATCCCTTCGTGATGCGCGTTGCGAAGGTGGGGAGGGACA  
CGGCGCTGGCCAGGTCATCCGGCTGGTGGAGCGCGCTCAAGGATCGAAGGCGCCGGTGCAGCGCCTGGC  
GGATCGCATCTCCGGCGTCTTTGTCCCGGCCGTGCTGGGGGTGGCCCTCGTCACGTTCCCTCGTATGGGGC  
GCCTTGGGGCACTGGTCGCACGGGCTGTTTGCGGCGATTGCAGTGCTCGTGATTGCCTGCCCGTGCTCGC  
TCGGGCTTGCCACGCCGACGGCCATCATGGTGGGCACGGGGCACGGCGCCGAGCAGGGAATCCTCGTGAA  
GGGCGGCGAGCACCTGGAGATGGCAGCGCGCTAGACACTGTCGTGTTTGACAAGACCGGGACGCTGACG  
GTGGGGAAGCCCGTCGTGACGGAAGTCTGGGCAGCCGAGGGCGTCCTGGAAGAGGACGTGTTGAGGTTGG  
CGGCCGCACTTGAGGCGCAGAGCGAGCACCCGCTCGGACGCGCGGTGGTCGAGGCGGCGAAGGCGCGCGG  
CGTGGAGATTCCGGCGGCGAAGGACGTGACGGCCGTGCCGGGGCGCGGCATCGAGGGCGTGGTGGAGGGT  
GTGCGCGTGCGGGTGGGCAGCCCGAGCTTCGTGTCTCCGCTGCGCCGGGCCTGCCGGAGGAAGTGC GCG  
GCAAGCTCACGGGGCCGGGCCGACCGTCGCGGTGGTGGCGCAGGGGAATCGGGTGATAGGTGCCATTGC  
CATGGCCGACGAGGTGAAGCCGGACGCGCGAGGCGGTGGCTGCGCTTCGGGAGATGGGCGTGGACGTG  
TGATGATGACCGGCGACGCGGAGGAGACCGCGCGCGAAGTGCGGGCGCGCCTCGGCATTGAGCACGTGA  
TGCCGAGGTCATGCCTGGCGACAAGGCGGCGAAGGTGGAGGGCTACGGAAGTCCGGGCGCGTCTGGC  
CATGGTCGGCGACGGCATCAACGACGCGCCGGCGCTCGCCGCGGCGGACGTGGGCATGGCGATGGGCACG  
GGCGCCGATGTGGCGCTCGAGGTTGCGGACGTGGCGCTGATGCGCGGCGACGTGTGGGCCGCGGTGGACG  
CGCTGCGCCTCGCCAAGGCGACCATGCGCAAGATCCGGCAGAACCTGTTCTGGGCGCTCGTGTACAACGT  
GCTCGGGATTCCGCTCGCTGCCTTAGGCGTTTTGAGCCCCATCATCGCCGGGGCCGCGATGGCCTTAAGC  
TCAGTGAGCGTGGTGTCAAACAGCCTGCTCTTGCGGCGCACGCGCCTCGGCTCGCCGTTGCGCCAGTAG

>gi|339626328:c3356477-3354051 *Sulfobacillus acidophilus* TPY chromosome, complete genome\_73

ATGGCGGTGACACCCGAATCTCAGAACGACCAGACCGTAACGGTCGAAATCGGCGGTATGACATGCGCCA  
GTTGTGCGCTTAGCATCGAAAAGGCGTTAAACCATCTACCCGAGTCGGCCGGGCGAAGTCAATCTGGC  
CTTGAACGAGCCGATATTCGGTTTGATCCGGCGACCGCCCCATTCCCGAGTTAGTGGACACGATCACC

CAGTTGGGCTATACGGTACGGCAAGATTGATAACCTTGATGGTGCCCGGGATGGACGAGGAACCGCTTC  
GCGAACGGGCCGAACAGGTTGCCAACGCATTACCGGGGTGGTTGCGGCCCGCGGAACTTGGCAACCGG  
TACGCTCACGGTAGATTTTCTGCGGGGGTTCGTCGAGATCCCGGAGATTATCGCGCGCTTGCCGACGCG  
GGGATTACCGCCCGGGTAGTGGGCAATGACCAAATGGATGCCCGTGCCTGGAGATGGCCGAATCGCGTC  
AGCGGCTGGTCAGTGCGGTCATTTTACGGTACCGATCTGGCTCGCCATGCTCCATACCATGACCGGTCT  
CGGACCGCGGTGGCTCGGGGAGCCGTGGGTATTGGCCGTTCTGGCGACGGCCGTGAATGGGGACCGGGT  
TTTCCGTTTATCAAACGGGCTTATCTCAATTTACGACATAAAAATGCCAATATGGACGTGTTGGTGGCAG  
TAGGCACATTGGCGGCGTGGGGTTTGTGCTCTATGATTTGAAGGTTACGGGGCCGTTATATTTTGATTC  
GTCCGCCACCGTCATCACGTTGGTGTAGTCGGTAAATACTTGGAGTCGGTGGCCAAAGGCCGTACCGGT  
CAGGCGCTGACGGAGCTTTTGGCGTTACGCCCGGCATCGGCACGGCGGCAGACCGCGTCCGGCGACTGGG  
AATCGGTGCGGGTGAATTGATTCAGGTCGGGGACCGGGTGCAGTTACGGGGCGGGTACCGGGTGCCGGT  
CGATGGTCGTGTGTTGGAAGGTCACAGTGCGGTCGACGAATCCATGCTCACAGGAGAACCCTGGCCTGTA  
CCGAAGGGGCCGGCGATCCGGTTACGGCAGGCACCATGAACGGCTCCGGCACATTGGTAATGGAAGCCC  
AGCGGGTTGGACGGGACACGGCCTTGGCGCAAATTGTACGGGTCGTGGAATGGCGCAAGCGCATAAGGC  
GCCGGTGCAGCGCTTGGCCGATCGCATCGCCAACGTCTTTGTCCCTACGGTGATGACGATTGCCCTGTTG  
ACGTTTTTAGGGTGGGGACTCGCAACGCACGACTGGCGTGCCAGCGCCTTAATTGCGGTCGCGGTGCTGG  
TGGTGGCTTGCCCTGTGCCCTCGGGTTGGCGACCCACGGCGGTTCATGGTCGGCTCCGGATTGGCGGC  
CCGCCAGGGGATTTTGTTCGAGCGCGGAGGCGCTCGAGCGGGCGAGCCAGGTGGACATTGTGGCATT  
GACAAAACCGGTACCTTAACGGTGGGGCGTCCGGAAGTCGAAGAGATTCTGACCGCGCCGGGTGTGTCGG  
CGGGAGAGCTCATGGCCTGGGCAGCGGCGATTGAAAAGGCATCCAGCCATCCCCTGGCTCGAGCTGTGCT  
GAGCTATGCCGAAGACCATCGATTGGCCGTTCCCGAGGGCGAAAGTATTTATACGGAACCGGGCCAAGGA  
ATGGTGGGTTATATTGGCAGCCAAGAGATTTTGGTCGGGAATTTAAAGCTTCTCACGGCTTATGGGGTCA  
TACCCGACGAAACGGTCATCCGAAAAGTCGATCAGCGGCTTAAATCCGGTGCCAGTGCCATTTGGGTGCG  
TCAGGACGGTCAATGGCGGGGAGTCGTGGTGGTGGCCGATACGCTGCGACCGGAGGCGCGGGACACGGTT  
AAACGGCTCCAACGGCAGGGGCTCGACGTGGCCCTTTTACCGGGCGATCAAAAAGAGACCGCCACAGTG  
TCGCCAACGTCTCGGTATTCACCGCGTGGCGGCGGAATTGCTACCGGAAGCCAAGGCCGAGACCGTGCG  
GGAATGGCAAGCCCGGACACCGCGTATTGATGGTCGGCGACGGCATTAAACGATGCGCCCGCTTTGGCC

ACGGCCGACGTCGGGGTAGCCATCGGGACGGGTACCGATGTTGCGATCGAATCGGCGGATATCACCCTTT  
TAGGCGATGATTTGTCCGGCGTCGTCCGCATGTTGGTGATTGCCCGCAAAGCTTAGGTAAAATTCGTCA  
AAACCTCTTCTGGGCGATGATTTATAACGTGCTCATGATTCCGTTAGCCGCTTTCGGTTTCTTGTCGCCG  
ATGGTGGCCGGCGCGGCGATGGCGTTTAGCTCGGTCTCGGTGGTGTCCAATTCCTTGCTGCTGCGGATGG  
CACGACTGCCTCGAACGCGTCAAAGACCGCTGGCCAAACCCTCGTAG

>gi|555077094:c2133897-2131291 Tepidanaerobacter acetatoxydans Re1 complete genome\_74

ATGAATGTGGAAAAACTTATAATGTAACCGCATGACATGTGCTGCATGCTCGGCTGCCGTTGAACACA  
GCGTAAAAAAGGTTTATGGTGTAGAGTCGGTAACAGTAAACCTGCTGACAAACAGCATGCGTGTTAATA  
CGATGATGAAAAGACATCAGATATTGAAATAATAAAAGCCGTAGAAGATGCGGGATATGGTGCATCTTTA  
AAAGAGAAAAAGGGAATAAAGCAAAAAGCAGAAACAATAAGCTAAGACTTTGGCAGATGCGGAAATAG  
AGGATATGAAACTGCGCTTGAAGGTTTCTATTTTATTTATGATACCTCTAATGTATATATCCATGGGACA  
TATGCTAAATCTGCCGCTGCCGCTTTTCTTATCCGGCATAGAAAATGCGGTTTCTTTTGCCTTTGCTCAG  
TTTTTATTGGTGTACCGATTGCTTTTGCTAATCGTAAATTTACACAATAGGTTTTAAACTTTATTTA  
AAGGTCATCCAAATATGGATTCGCTGATAGCTATCGGCTCAGGCTCGGCCCTTATCTATGGTGTATTTGC  
CATTTTTCGCATGAGTTATGGTTTGGGTGCCGGCGATTTTGAATTAGTCCACAGATACTATCATGATTTA  
TATTTTGAATCAGCAGCCATGATTTTAACCTTATCACAGTAGGAAAGTTTTTAGAAACTCGAGCCAAGG  
GTAAAACACAGACGCTATTAAGAAATTGATGGACCTTGCGCCAAAAGCCGCCAGGGTAGAAAGGGACGG  
CTTGAAGAAGAAATCCCGGTAGAGTCGGTCAAAGTAGAAGATATTATAGTAATACGTCCTGGAGATTCA  
ATCCCGGTGGATGGTATAGTGATTGAAGGGCAATCTGCCGTGGACGAATCCGCATTAAGTGGTAAAGTA  
TTCCGGTAGAAAAGCAGCCTGGAGACAGGGTAAGTGCAGGGACTATAAACAGAACAGGTGCTTTTAAATT  
TAGGGCTACACAAGTGGGAGAAGATACGACACTTGCTAAAATAATAGCATTGGTGGAAAGATGCAAATGCC  
ACGAAAGCTCCGATAGCAAAGCTCGCAGACAGGATAAGCGCCGTCTTTGTCCCCACAGTAATCTGTATTG  
CTCTTATTGCAAGCATAGCGTGGCTTTTTGCAGGCTACAGTTTTGAATTTGCTTTGTCAATAGGGATATC  
GGTTTTAGTTATCTCATGCCCTGCGCATTGGGACTTGCTACGCCTGTTGCGATAATGGTCGGAACCGGA  
AGGGGGGCAGAGCACGGAATATTAATAAAGTCGGCAGAGGCTTTAGAGGCGCTTTCAGTATAAACACCG  
TTGTCATAGATAAAAACCGGAACATTGACACAAGGTAAGCCTCAGGTAACAGACATTGTGCTTTGCGGGGC  
AGAATCCGAAGAAGAAGCTTTTAAAATTGCCAGGCATTAGAGAAAAATTCGGAACACCCGCTGGCAGAA



GCTATTTTAAGTTATTGCAAAGAAAGAGAAATTCCGCTGATAGAAATTGACGAATTCAGGTCTATTCCAG  
GCCGAGGCGTAGAAGGGTACATTAAGGGATGGCATACTTTGCGGGAAATGAGCAGTTTATCAAAGAAAA  
GCAAATTGACATAAACATGGCTGTTGAGCTGTGCGACAACCTTTCAAATGAAGGTAAAACCCCGCTTTAC  
TTTGCAAGTGCTCATACTACTAGGGATTATTGCTGTTGCAGATGTTTTAAAACCTACTAGCCGCCAAG  
CGGTTACAGAAATTTAAACAAATGGGCATTAAGTAGTTATGCTTACAGGAGACAACCTAAGACGGCAGA  
AGCCATACGCCTGCAGTTGGAGATTGATGAAGCAATAGCAGGAGTGCTGCCTCATGAAAAGGATAAAAAAG  
ATTCAAGAGCTTCAAAGCCGGGGACAAAAGGTTGCTATGATTGGCGACGGAATTAACGATGCACCTGCTT  
TAGCAAGAGCCGACGTAGGAATAGCCATAGGTGCAGGAACAGATGTTGCCATTGAATCTGCGGATATCGT  
CCTTATAAGAAGCGATTTAATGGATGCGGTGGCGGCTGTAGAACTTTCAAAGCAACAATAAGAAATATA  
AAGCAAAATCTTTTCTGGGCGTTTTTCTACAACACCTTGGGCATTCCCATTGCTGCAGGAATCTTATATC  
CTGCCTACCATATAAAGCTTACTCCTATGATTGGTGGCGGAGCTATGAGCATGAGCTCGTTTTTCGTAGT  
TACGAATGCGCTGAGGCTTCGAAAATTTAAACCTACTGTACCTAAAACAGAATGTAGCGTTCAGTGCGGC  
ATGCAGAAAAATGCATCAATGACCGTTGCTAAGGTAAGTAATTCCTCAAATAATAAAAATAATGAAAGGG  
AGATTGAAAAAATGAAAAAAGTTTTGAAAATCAAAGGCATGATGTGTGAACACTGTAAGATGCGTGTTGA  
AAAGGCTTTAAATGCAATAGATGGAGTTAACGCAAGTGTTAATCTAGAGGATGGTTCAGCCGAGGTAGCA  
TATCTAAAACCGATATCTGATGAAACGTTAAAACATGTTATAGAAGAAGCAGGGTATGAAGTAACATCCA  
TTGTGGAGGAGGTATAA

>gi|297625198:2086157-2087692 Propionibacterium freudenreichii subsp. shermanii CIRM-BIA1  
chromosome, complete genome\_75

ATGAAGGCAACTCGACGCAGCGTGCTGGCGGGATCCATGGCAGTGGCGGGCAGCTGGTTGCTGGCCGCCT  
GCTCGGCGAACAGCCCGTCCAACCTCGGTCTCGCAGGCCTTCGCCACCCCGAGCGCACTCACCCCGAGCCC  
CGGCCAGCACGTGGTCACCAGGACCATCACCGCCTCGGCCTTCACCGCCGACCTGGGTGGGGTCAATGTC  
AACACCTGGGGCTACGGCAACACCTGCCCGGCCCGAACTGCGCGCCAGCGCCGGCGACCTGCTGCGCA  
TCACCCTGGACAACCAGTTGCCGGCCCCACCACGATCCACTGGCATGGCATCCAGATCCGCAACGCCGC  
CGACGGCGTGCCGGGCCTCACCCAGGACGCCGTCACCCAGGGCACCAAGTTCCTGTACGAGTTCGTGGCC  
CCCGATCCGGGCACCTATTTCTTCCACTCCCACCAGGGCGTGCAGCTCGACCGGGCCTGTACGCGCCGC  
TCATCATCGATGACCCCGCCGAGCCCGGTGGCTACGACCAGGAATGGGTGGTCACCCTGGACGACTGGGT  
GGACGGCACCGGCCGACCCCGACCAGGTCTTCGCCGACCTGAAGTCCAGCGGTGGCGACGACTCCTCG

TCGTCGTCGAGCCAGGGCATGGGCGGCATGGGTGGCATGCACGGTTCGGCATGGGCGGCATGAACGGTT  
CCAGCATGGGCGGCATGAACGGTTCAGCGGCTCCATGATGGGCGACTCGCCCTTCGGCTCGGTGGGCGA  
CGTCGCCTACCCGCACTACCTGATCAACGGGGCAATCCCCGCCGACCGCGCACCTTCAGCGCCAAGCCC  
GGCCAGCGGGTGCATCCGGCTGATCAATGCCGCCTCCGACACCCTGTTCAAGGTGGCGCTGGGTGGCC  
ACACGATGAGCATCACCCACACGGATGGCTATCCCGTGCAGCCCCACGACACCAGGACGCTGTACATCGG  
CATGGGCGAGCGCTACGACGTGCTCGTGACACTGGCCGACGGCGTGTCCCGCTGGTGGCCCAACCCTTC  
GGCAAGCAGGGCCAGGCCCTGGCGCTGGTGCACACCGGCGCCGGCGACGCCCCGTCCGAGATGTGCACC  
CCACCGAGCTGGACGCCGACGCCACCCGAGCCGGCGAGCTGACCCCCACCGACGCGGCACGCCTGCCCGC  
GCACGACGTGGACGCCATGCCGACGTGAAGCTGGCCGGCACGATGAGTCCCTATGTGTGGACGATCAAT  
GGTGATGTCTTCGGCAAGAACACGCCCATCGGGGTGAGCGAGGGCCAGCGGGTGCAGCTCGACGTGACGA  
ACTCGTCGATGATGAGCCATCCCCTGCACCTGCACGGCCACACCTTCGCGCTGCCCAATGGCGTGCGCAA  
GGACACCGTCGTGGTGCCGCCGATGACGTGACGAGCCTGCAACTGCAGGCCAGCAATCCCGGCGCCTGG  
GCCATGCACTGCCACAACATCTACCATGCCGAGGCCGGCATGATGATTGCGCTGAATTACCGCTGA

>gi|308175814:736015-738018 *Arthrobacter arilaitensis* Re117 chromosome, complete genome\_76

GTGAACAGGCTCCAAAATGGGTCTATGGGAACTGGTCAGTCCCCGTCGTATCCGGCGTGCTCATCATCA  
TCTCCTTCGCCATCCAGCGGCTGGCCGGGGGTGTCGCCAACCTCACCGTCAGCCCCAGTGGTGGCTCGA  
CGCCGGGGCCCACGCCACTCACGCCAGCGCGGCTTTCACCCTCGGGGATGTCTTCATGATCGCCGCGGCC  
GTGGTTGCCGGCTACGGGATCGTGGCGAAGGCGGTGCGCGCGCTGATCGCCAAGGTCGTCCGGCATCGACC  
TGCTCGTGTGGTTGCGGCTATCGGCGCGGTCATCATCGGCAACTTCTGGGAGGCCGCGGCGGTACGTT  
CCTGTTGCGGATCGGCCACGCGCTGGAAGCTGCGACCCTGAACAAGACCCGCTCGGCACTGGCCGAACTC  
GTCGCCGTGCCCCGATTCCGCGATCGTTGTGCGCGATGGCGAGCAACAGGAGATCCCTGCCGGGCAAG  
TGAGAATGGGCGAGATCGTCTGGTCAAGAACGGTGCGAAGGTCCCCGTGGACGGCCAGGTCGTCTCCGG  
CACCGGTGCCATCGACGAGGCCTCCATCACCGGCGAGTCCATCCCGGTGGAGAAAATAAGGCGGGCAG  
GTCTTCGCCGGCACCGTCTCCCGCGGCGGCTTCTACAGGTCTGGCCACTGGCATCGGCGCAGATACCA  
CCTTGGCCCCGATCATCCACCGTGTGGAAGAGGCTCAGGACGCCAAGGCCAAGACCCAGGCCTTCATCGA  
CCGGTTCTCCACGTGGTACACCCCGCCGTCATGGTCTGGCCCTGGTGGCCGGACTTATCAGCGGAGAC  
GTGGTGCTGGCCCTGACCCTGTTGGTTCATCGGCTGCCCGGGCGCCCTGGTGATCTCCATCCCGGTGCCA

TCGTGGCGGGCATCGGCCGCGCCGCGCGCAACGGCATCCTCATCAAGGGCGGCGAGTTCCTGGAGACCTC  
CGCGAAGATCACGGCGGTGCGCCGTGGACAAGACCGGCACCCTCACCGAGGGCAAACCGCAGCTGACCGAC  
GTCATCATCCTGGATTCCACGCTCGACCGTACGGAGGTGTTGCGCTGGGCCGCGGCAGCTGAGGCCGGCT  
CCGAACACCCACTGGCCCCGCCCATCCTGGAGACCGCCCCGCGAGGAGGGCGTTGCCCCGCAGGGCATCCC  
CGGCGCCGTCACCCCGGTCCCCGGAAGGGCATCGTGGCGAACGTCAATGGCCGCCAGGTGCTGATCGGC  
AACCCGCCGCTACTGGAGCAGTACGGCATTGCCTCGGGCATCGCCGAGGCTGCGCAGGCCGCCAGGACC  
TGGCCGCCGCCGGGAAAACACCTATGATCGTCGCTGTTGACGGGAGGGTATCGGGCGTCGTCGCCGTCGC  
GGACCAGATCCGCCAGGACGCACCGGAGATGGTCGCGCGACTGCACCGGGCCGGCGTCGAGAAGGTCGTC  
ATGCTCACCGGTGACACCCGACCGGTGGCCGAGGCCGTCGGCAAAGCCACCGGGATCGACGAGATCCACG  
CCTCCCTGCTCCCTGAGGACAAGCTGGACGCTGTCACCGAGCTACAGCGCCAGGGCCACACGATCGCGAT  
GGTCGGTGACGGCGTCAATGACGCTCCGGCTCTCGCCACCGCGAACATCGGCGTGGCGATGGGTGCGGCA  
GGCTCGGCCGTGGCCGTGGAGACCGCGGACATCGCCCTGATGGGCGACAACCTGCTCAAGCTGCCCGAGG  
CCATCGGCCTGGCCAAGCGAACCGTGAACGTGATGAAGCAGAACATCGCGATCGCCCTGATCACCGTGGT  
GCTGCTACTGGCCGGAGTCTTCGCCGGCGGAGTGACCATGTGATCGGCATGCTCGTCCACGAAGCCTCC  
GTGCTCGTGGTGATCGCCAACGCGATGCGGCTGCTGCGAAACACCCGAGACTCCACGACGATGCCAAAGA  
GTGAACGCACCATCGGGACAGCTGCGGAGCAGGTGGCCGCCTGA

>gi|226303489:4793163-4795424 Rhodococcus erythropolis PR4 DNA, complete genome\_77

ATGACGTCACCGACTGCGGTGACAATGCTGCCAACTCGAGCAGCGTCGAACTCGCGATCACCGGAATGA  
CCTGCGCCTCCTGCGCGTCACGAATCGAGAAGAAGCTCAACAAGATCGACGGCGTCACAGCCACGGTCAA  
CTACGCGACGGAAAAGCCAAGGTCACCTCCCGACGGGGTACCCGTGGAAGATTTGGTCACCGCCGTC  
GAGAATGCCGGTTACGCTGCCGCGCTCCCGAAACCGCCAGCGCGCCAGACACCGTACCCGGATGCGG  
AGACCCCGCAGGATCGTGATCTGCGCGAGCTTCGTACCCGCTGATCATCTCGACTCTGCTCTCCGTGCC  
GGTCATCGCGATGGCGATGATTCCTGCGTTGCAGTTCGACAACCTGGCAGTGGCTCTCCCTCACGCTGGCC  
GCACCGGTCATCGTGTGGGCGGCCCTTCCCTTCCACCGGGCTGCCTGGGTCAACCTGCGTCACGGCGCCG  
CAACGATGGACACGCTCATCTCTCTGGGCACCATCGCAGCGTTCGTCTGGTCGCTGTATGCACTGTTCTT  
CGGCACCGCGGGCGAAGCGGGAATGAAACACGCGTTCAGACTGACGGTCGACCGGATGGACGGCAGCGCC  
AACATCTACCTCGAGGTTGCCGCGGGCGTCATCACGTTGCTGCTCGCCGGACGCTACTTCGAGCACAAGT

CCAAGCGCACGTCCGGCGCCGCACTACGCGCGCTCATGGAACCTCGGTGCAAAAGACGTCGCGGTACTGCG  
AAACGGCGTCAAGTACGAATCCCCGCCGAAGAACTGGCAGCGGGCGACTCCTTCATCGTTCGGCCCCGGC  
GAGAAGATCGCCACCGACGGCATCATCACCGAAGGCCGCTCAGCCGTCGACATGAGCATGTTGACCGGCG  
AATCCGTCCCGGAGGAGGTCTGGTGTCTGGAGACACCGTCTGCGGGGCCACCGTCAACGTCTGGTGGAACATT  
GACCGTCGAGGCCACCCGAGTCGGGAGCGACACCCAACTCGCCCAGATGGCGGCACTGGTCTGAAGACGCA  
CAGAACGGCAAGGCCGAAGTTCAGCGCCTCGCCGATCGGATCGCCGGTATCTTCGTACCGGTCTCATCG  
CGATTGCCGTTGCGACACTGGGCTACTGGCTCGGTACCGGCAACCCCATCGAGATGGCGTTCACCGCTGC  
GGTCGCCGTGCTGATCATCGCGTGCCCGTGTGCTCTCGGATTGGCAACGCCACAGCTCTGTTGGTGGGC  
ACGGGCCGCGGAGCCCAGATGGGAATCCTCATCAAGGGACCCGAGGTGCTCGAATCGACGCGCGCCGTCG  
ACACCGTCGTGCTCGACAAGACGGGAACCGTCACCACCGGTGAGATGACATTGCTGGACACCGTGGTGGG  
CGAAGGAACAACCGTCGACGAGGTCTTCGGCTGGCCGGTCACTCGAACATCGCTCCGAGCACCCCATC  
GCCGCTGCGATCGCGAAGGGTTCGACCGAAGCCGTGGGCGAATTGCTTGCAGGTCGAGGATTCGTGAACG  
TCGCCGGTCGCGGCGTGCAGGGAATGGTCGAGGGTCATGCCGTTGTTGCCGGCCGAGACGCGCTGCTCGC  
CGACTGGTCGATGCCGTTGCCGAAAATCTCCGTGACGCGAAAGCTGAAGCAGAGAAGGCCGGGCGCACC  
GCAATCGCGGTGGGCTGGGACGGCAAGGCGCACGGCGTCTCGTAATCGCCGACGCGGTCAAGGACACGA  
GCGCCGAAGCAATCGCGCAGTTGAAGGCACTCGGCCTCGAACCGGTTCTGCTGACCGGTGACAACGCCAC  
CGTCGCCCCGACGGTGGCGGATCAGGTCGGGATCAGCACCGTCTTCGCCGAGGTCATGCCGGCGGACAAG  
GTCGACGCCGTCAAGAAGCTGCAGGCGGAAGGACGCGTCTGATGCCATGGTCGGCGACGGCGTGAACGACG  
CGGCGGCCCTGGCTCAGGCCGATCTCGGTCTGGCGATGGGCACGGGTACCGACGTTGCGATCGAGGCCAG  
CGACATCACCTGGTTCGAGGTGACCTGCGGTCTGGCAGCCGATGCAATTCGACTGTCCCGCAAGACGCTC  
AAGACCATCAAGGGCAACCTGTTCTGGGCATTGCCTACAACACGGTCTGCGATCCCGCTGGCTGCGGCCG  
GCCTGCTCAACCCGATGCTCGCTGGTGCCGCAATGGCATTGAGCAGTGTGTTCTGTTGGTGAACAGCCT  
GAGGTTGCGGCGGTTCAAGTAA

>gi|148271178:1187078-1189552 *Clavibacter michiganensis* subsp. *michiganensis* NCPPB 382  
chromosome, complete genome\_78

GTGACCGACCCCGCATCCGGATCCGCGCCCGCTCCGGCCCGGATGCCGCCCCGCATCGGCGTCCGACG  
GCGGCCCGGTGCTCACGCGCGTGCACCTCGACGTGCAGGGCATGACGTGCGCGTCTGCGCGATGCGCAT  
CGAGCGGAAGCTCGGCCGATGCCCGGGTTCGAGGCCCGCTCAACTACGCCACCCATCGGGCTCGCGTG

CAGCTGCCACGGGCACGAGCGTCGAGGACGCCATCCGCACCATCGAGCGCACGGGGTACCGCGCGTCCG  
AGCGGGCCGGGTGGGGAAGCGCGCCGGCGGACGGCGTGTCCGGATCCGCTGCTGCTGCTGCTGCTGC  
TGCCGCTGCCGCCGATCCGCATCCGCGGAGCGCGCGCCCGTTCGCGGTCGCGGCTCCCCCGTCCGCCCG  
GACGCGCCCGCCGCCCTCGGATCCCGCACCCGCGCCCGCCCGGAGGATCCGCCCGCCCGGACGCCG  
TCGCCCGCCGCCCGCCCGACGCCGATGAGCTCGCGCTCCGGCAGCGGCTCGTGGTCTCCGCGGCGCTCAC  
CGTCCCCGTGTTCTCATGGCGATGCTCCCCGCGCTCCAGTTCCCGAACTGGCAGTGGCTGTGCTCGCG  
CTCGCCGCGCCCGTTCGCGGTCTGGGGCGCGTGGCCGTTCCACCGGTCCGCGGCCGTGAGCGCGCGCCACG  
GCGGCGTCGGCATGGACACGCTCGTGAGCATCGGCGTCGCCGCCGCGTTCCTCTGGTCGCTCTACGCGCT  
CTTCTCGGCGACGCGGGCCGACCGGGCATGCGCATGACCTTGAGCCTCGTCACGGAGCCCGGCGGGCGGA  
TCCGGCGACGTCTACCTCGAGGTCGCCGCGGCCGTACGGTCTTCTGCTCGGCGGCCGCTACCTGGAGG  
CGCGTGCCGCCCGCGCGTCCGGCGCCGCCCTCGCCGCGCTCCTCGACCTCGCCGCGAAGGACGTGCGGGT  
CGTGCGGACGGCGTCGAGCGGCGGATCCCATCCGCGAGCTGCGCGTCGGCGAGGAGTTCGTGCTGCGG  
CCGGGCGAGCGGATCGCGACCGACGGCGTGGTTCGTCGACGGATCCAGCGCGGTCGACCGCTCGTCTCA  
CGGGCGAGTCGCTGCCGTCGAGGTCGGCCCCGGCGACGACGTACGGGCGCGACCCTAACGCCGGAGG  
CCGGCTGCTCGTGCGCGCCACGCGCGTGGGCGAGGAGACCCGTCTCGCCCGCATGGCCGCGCTCGTGGAG  
GAGGCGCAGACGGGGAAGGCGCGGATCCAGCGCCTCGCCGACCGGGTCTCGGCCGTGTTGTCGCCGTCG  
TGCTCGTGCTCGCGGTCGGCACGCTCGTCGGCTGGCTGCTGCTCGGCTTCCCGCCCGAGGCCGCGTTCAC  
CGCGGCCGTGGCGACCCTGATCATCGCGTGCCCGTTCGCGCCCTCGGACTCGCGACGCCGACCGCACTCCTC  
GTGGGCACGGGCCGCGGCGCCAGCTCGGGATCCTCATCACCGGCCCGAGGTCCTGGAGTCGACCCGGC  
GCATCGACACCGTGCTGCTCGACAAGACCGGCACCGTACCACCGGCGTCATGTCGCTCGTGCGGGCCGT  
GGCCGCGGCGGGCGTTCGACGCCGATGAGCTCGTTCGCGTGGCCGCCGCCCTCGAGGCGCGGTCGGAGCAC  
CCGGTGGCGCGGGCCGTTCGTCGAGGCGGCGGGTTCGGGATCCGTCCCCGCCGTCAAGGGCTTCGTGCGGA  
CCGCGGGACTCGGCGTCCACGGCGTGGTGGACGGCCGCGCGGTCGCGGTCGGCCGGCCGTGCTGGCTCGC  
GGAGCAGTGGGCCCGGAGCCGGACGCGTCGCTCGCCGAGGCCCTTTCGCGGGGGCCGAGGCGGAAGGATCC  
ACCGTGATCGCGGTCGCGTGGGGCGGTGCCGTCCGCGGGATCCTCGCGGTCGCGGACACCGTCAAGCCCA  
CGAGCGCCGAGGCCATCCGCCGATCCGCGCCCTCGGCCTCCGTCCCGTCTCTGACCGGCGACACGGC  
GGGCGCCGCGCACCGCGTCGCCGCGGAGGTCGGCATCGACGAGGTGATCGCGGGCGTCTCCCCGAGGGC

AAGCTCGACGCGGTGCGCCGCTGCAGGCCGAGGGGCGCGTCGTCGCGATGGTCGGCGACGGAGTGAACG  
ACGCCGCCGCCCTCGCGCAGGCCGACCTCGGGATCGCGATGGGCACGGGCACGGACGCGGCCATCGAGGC  
GGGCGACATCACGATCGTCCGCGGGACCTCGTGCTCGTCGCCGACGCCGTCCGGCTCGCGCGGGCAGC  
CTCGGCACCATCCGCGGCAACCTGTTCTGGGCCTTCGCGTACAACGCGGCCGCGATCCCGGTCGCGATGG  
CCGGCCTCCTCAACCCGCTCGTGGCCGGGCTCGCGATGGCGCTGTCGTCGGTGTTTCGTCGTCACGAACAG  
CCTGCGCCTGCGGTCCTTCCGGTAG

>gi|300781937:c7223833-7221563 Amycolatopsis mediterranei U32 chromosome, complete  
genome\_79

ATGTCTTCCGAGACGACCACACCCGCCGCGCAGAGCGTCGAGCTCGCGGTGCGCGGTATGACGTGCGCCG  
CCTGCGCGGCACGGGTGGAACGCACCCTCAACAAGCTCGACGGTGTCCGCGCGACGGTCAACTTCGCGAC  
CGAACGCGCGGCCGTCCGCTGCCCGACGACCTTGATCCGGCCGTGCTCACGAGCGCGGTGCGGAAGGCC  
GGCTACACCGCCGAAGTCCGCAAGGGCGCCGCGCACGACGCCGCCAGGAGGACGCGCACGCCGCACGGG  
TCCGTGATCTGCGGCGTCGCTCGGACAGGCGATGTTGCTGTCGGTGCCGCTGGGGAACCTGTCGATCAC  
CTCGGCGTTGGTGCCGTGCTGCGGTTCCCTGGTGGAGCTGCTGTGCCTCGCGCTGGCCACCCCGATC  
GTCTTCTGGGCCGCGGCCGTTCCACCGGGCGGCGTGGCGGAACCTTCGGCACGGTTCGTCCAGTATGG  
ACACTTTGGTGTCAATTGGGGGTGTTGCTTCTACGGCTGGTCCACGTGGTCGGTGCTGACCGGCGGATC  
CGGTGCGGCCGGGTACTGGCTGGGGTTCGGCACGACGGCCGCCGGCGCCGACTCGGTCTACCTCGACGTC  
GCCGCCGGGGTACGACGTTCTGCTCGCCGGCCGCTACTTCGAGACCCGGGCGCGGCGCAGTGGGGCG  
ATCTGCTGCGGGCGCTGGACGCGCTGGCGGCCAAGGACGTCCGCGTCCTGCGCGACGGCACCGAGGTCAC  
GGTCCGGTGGCCGACCTGGCCCGGCTGACGAGTTCGTCGTGCGACCGGGGAGAAGGTCGCGGCGGAC  
GGCGAGGTCGTCCTCGGAATGTCCACTGTGGATGTCGCTGCGGTGACCGGTGAGCCCCTCCGGCGGAAG  
TCGCCGTGCGCAGCCGGGTGATCGGCGGGAGCGTGAACCGCAGCGGCCGCTGGTCTGTCGGGGCCACCGA  
GGTCGGGGCGAACACGCAGCTGGCGCAGATGAGCGCGCTGGCCGAGCGGGCCAGGAACGCAAGGCGAAC  
GTGCAGCGGCTCGTGGACCGGATCTGCGCGGTGTTTCGTGCCGGTCGTGCTGGGTATCGCCGTGGTGACGC  
TCACCGGCTGGCTGCTGGCCGGGACCCGGTGCGGGCCGGTTCGGCGCGGCGGTGTCGGTGCTGATCAT  
CGCCTGTCCGTGCGCGCTCGGACTGGCCACGCCGACGGCGTTGATGGTCGGCGTCCGGCCGCGGCGCAG  
CTGGGGATCCTCGTCAAGGGCCCGACGCGCTGGAGGCCAGCCGCCGCTCGACACCGTGGTCCTGGACA  
AGACCGGCACCGTGACCAGCGGGCGGATGACCGTGACCGGCGTCCGGCCCGTGGGCGGGCGGACCGCCGA

GGAGGTGCTGCGCGCCGCCGCGGCGGTTCGAGGCGGCGTCCGAGCACCCGATCGCCGTCGCCGTGGTCGCC  
CGGATCTCCGGCGAGCTGCCCCAGGTGACGGACTTCCGGGCGCTGCCGGGGCTCGGCGCGGCCGGTGCCG  
TCGACGGCGTGCCTGTTCGTGGGGCGGGCGGGTCTCACCGAGGAGGGCGTCCCTGTTCCGCCCA  
GGTCGAGGCGGACGTGCCGCCGCCGAGAGCGAGGGCGTCACGGTCGTGCTCGTCGCTGCGACGGCGAG  
GTGGCCGGGCTGTTGCTGGTGCAGACGAGGTCAAGCCGTCGGCCGCCGAGGCGGTCCGGGCGCTGCACG  
CGATGGGCTGAAGACGGTGTGCTGCTGACCGGCGACAACGAGGTGACCGCGCGGGCGGTGGCCGCCGAGGT  
CGGCATCGAGGACGTCCGCGCCGGAGTCTGCCTGCGGAGAAGGCCGAGGTCATCGAGCAACTGCGGGCC  
AGTGCCACCGGGTGGCGATGGTCGGCGACGGCATCAACGACGCCCCGGCGCCGCGACCGCCGACCTCG  
GCCTGGGGATGCCAGGGGCACCGACATGCCCTGCGTGCCGCCGGCCTGATCCTCGTGCAGACGACCT  
GCGCGTGGTGGCGGACGCGCTGAGCCTGGCGCACCGCACCCCTCGGTACGATCCGCGGCAACCTCGCCTGG  
GCGTTCGGCTACAACCTCGCCGCCATCCCGATCGCCGCGCTCGGCCTGCTCAACCCGCTCATCGCCGGCG  
CCGCCATGTCGCTGTCGTCCGTGCTCGTGGTGTCCAACAGCCTTCGCCTGCGAAACTTCGCCGGCACCGG  
TATCAGTTACGAAATCGAGGAAACCCGATGA

>gi|410864597:c256570-254561 Propionibacterium acidipropionici ATCC 4875 chromosome,  
complete genome\_80

ATGATGTCTGCTATCAGACGCCCGGGGCCGCGACTTGCCGCCCGGGATCCTCATCGCGGCCGCCCTGG  
TGATGGGCCGCTCGGCACCGATTGGGCACTGCCCGGCAACATCGCCATGGCTGCCGCCGCCATCATCTC  
GACCATCCCGATCGCGGCGGCCGCCCTGCGGGCGCTGCGCTCCAGGACGATCGGGATCGACCTGCTGGTC  
ACCATCGCCTCGATCGGGGCCCTGGCGATCGGCAACTACTGGGAGGCGGCCCGGTACCTTCTCTTCG  
CATTGCGCCACGTCTGGAGCAGGGGGCCATGACGCGCACCCGATCGGCCCTACCGATCTGGTGCCTC  
GGCCCCCAGGACGCGGTCTGGTGCAGACGGACGCACCGAGACCGTGCCACCCGCACCTGAGGCC  
GACGACGTGCTACTGGTCGCCGCCGAGCTCCGTCCCGGTGACGGGACGGTATCTCGGGATCCGGTG  
CCGCCGACGAGTCGGCGGTGACCGGGGAATCCATGCCCGCCGAGAAGACGCCGGGCGACCGAGGTGCGCTC  
CGGCACCACGCTCACCTCGGGGATGGTCCAGGTGCGCGCCGAGAAGGTGGGCTCCAGACCCTGCTGGCC  
CGCATCGTGGCCAGGGTCGAGGAGGCCAGGACGCCCGGACGGGTGCAGACGATGATGGATCGGTTCCG  
GACGCTGGTACACCCCGCCATCATCGTGCTTGCATCGTCTCGGGCTCATCAGCGGCAGCCTCACGCT  
GGCCCTCACCTGCTGGTATCGGCTGCCCGGCGCCCTCGTATCTCGGTGCCGGTGGCCGTGGTCCGCC  
GGTATCGGACGCGGGGCCCGGACGGCATCCTCATCCGCGCGGGGAGCATCTGGAGACCGCGGCGAAGG

TCGACACCGTCGTCTTCGACAAGACCGGGACGCTGACCACCGGGCATCCCGAACACCGACGTCGTGGC  
GTACGGGGCCGACAGCAGGAGGAGGTGCTGCGGTGGGCGGCGCTGGCCGAGATCGGCTCCGGGCACCCG  
CTGGCCGGCCCGATCCTCGACGCCGCCGGAGCCACGGCGTCGCCCCGAGGGAGTTCCCGGCGAGGCCG  
ACGCGATCCCGGGACGCGGCCTGATCGCCGACGTGCTGGACGCCGAGCACCCGCAGACCCGCCATCGGGT  
GGTCGTCGGCACAGTGGAAGTGGCCGGCCAGGAGCTGGGCTCCGACAAGGAGTCCGACACCGCATGGGCG  
GCCCCGACGTCCGCGCGGCTGGCCGGCGGCGGGGCCACGCCGGTACCGTCGTCCGCGACGGCGTCCTGC  
TCGGCGTGCTCGCGATCGCCGACACGATCCGGGCCGACGCCCCGCGCACTGGCCCCGGCTTCGCCGCAC  
CGGCGTACCCGTCTGGTGATGCTGAGCGGCGACCCGGCAGGAGGTCGCAAGCGCGGTGGCCGATCAGCTC  
GGCATCGACGACGCCGTGGCGGGCTGCTGCCGAGGACAAGCTGGCTGCAGTCCAGGAGCTGCGCGCCG  
GCGGAGCGGTCTGGCCATGGTGGGCGATGGGATCAATGACGCCCCGGCCCTGGCGGCCGCCGACGTCGG  
GGTGGCGATGGGGCGGCCGGCAGCGCCCTGGCGGTGGAGACCTCCGACATCGCGCTGATGGCCGACGAC  
CTACCCGGCTGCCGGAGTCGCTGAGGCTGGCCCCCGCACCCGCGCGGTGATCCGCCAGAACATCGTCA  
TCGCCGTCGCGACGGTGACCCTGCTGCTGGCCGGGGTGCTGCTCGGAGGGGTGACGATGGCGCTGGGGAT  
GCTCGTCCACGAGGCGTCTGTGCTCGTGGTCATCGTCAACGCCCTGAGACTGCTGGGACGCCGAGCCCCG  
ACCCGCGAGGAGTCCCGCCAGGACCAGGCCGGCAAGCAGGATCAGCCGTGGCAGACTTCAGAGCATGGCG  
GATCGAGATCGGGACGCCAGGGGGCTCCCCGCAACAGCAGGCCGCGTGA

>gi|470176208:c3559318-3556775 Acidimicrobidae bacterium YM16-304 DNA, complete genome\_81

GTGTCACCGAGCGGACGTGTTGACCTTCCCCTCGACTGGAACCCGTACGGTGATGGCATGACGACACCGA  
TGACCGACCATCGAGTGACGCTCGACCTCGACGTCGAGGGGATGACGTGCGGGTCGTGCGCGGCCGAGT  
GCAGAAGACACTGGCCAAGCAACCGGGAATCGCCGACGCCGAGGTCAACTACGCCACCGGTCGGGCCCGA  
ATCACCGCGGATGGCGAGATCGATCTCGACGCCTTGACGGCGGCCGTGCAACGCACCCGGCTACACCCTGG  
TCGTGCCGCACGGCATCGACGCTCAGCCCCCGAGTTCGATGTCGGCGGGATGACGTGTGGGTCTGTGCGC  
GGCGCGTGTGCAGAAGGTCCTCCAGCGACAGCCGGGCGTCGCCGACGCCGAGGTCAACTACGCCACGGGT  
CGCGCCGTCGTACCCCGCGGCCGGTATCCGCTCGATGCCGCTGGGCTCGCCGCGGCCGTCCGCAAGG  
CCGGCTACGACCTCGTCGCCGTCGACCGTTACGCCCGTCTCGGACCGTCCGGCGACGGAACGCGCCGA  
CCAGGCCGACGACGAGGCCCGTGAGCGTCGGCTGTGGCTCCGGCGAGCGCTCATCGCCGCTCCCGTT  
GCGGCATTCATGGTCTCGACCATGCTCTACCACGACCTCGCGATGGAGAACACCTGGCTGCGCTGGCTGC



AGTTTGCCTGGCCGTGCCGGTGCAGTTCTACGTCGGCTGGCCGATCCTCGTCGGCGCAGCGCAACGGGC  
ACGGCACCTCACCGCCAACATGGACACGCTCATCGCGATGGGCACGCTCTCGGCGTTCGTGTTCTCGACG  
TACCAGCTGCTGACCGACGGGATGGAGCTCTACTTCGAAGCGGCCGTCGTCATCCTGTTCTTCATCACGC  
TCGGCCGATACCTCGAGGCACGCGCCAAGAGCCGGGCAGGTAAAGCGCTTCGAGCGCTCGTCGAGCTCGG  
GGCGAAGGAAGCGCGTCTCGTCCGTGATGGTGTGGAGGAGATGGTGCCCGTCGACACGGTTCGCGTCGGC  
GACGTGGTCAAGGTGCGTCCGAGCGAGAAGGTCCCCGTCGACGGCGAGGTGGTCGACGGCGCGAGTGCGG  
TCGACGAGTCGATGCTCACCGGTGAGTCGCTTCCGGTCGACAAGCGGGTCGGCGACAAGGTGGCCGGCGC  
CACGGTCAACACATCTGGCGTGTCTACGATTCGCGCCACGGCGATCGGCGCCGAAACCGCGCTCGCGCAG  
ATCGTCGAACTCGTCGAGAACGCCAGACCGGCAAGTCGGCTGCGCAGCGTCTGGCCGATCGCATCTCCG  
CCGTGTTGTTCCGGTGGTGTGTCGATCTCGCTGCTGACATTCCTCGGCTGGACCGTCATCGGGGGCAG  
CGTCAGCGGGCGGGTCTACGCCGCCGTGCGCGTGTCTATCATCGCCTGCCCGTGCAGCGCTGGGGCTGGCG  
ACGCCGATGGCGATCATGGTCGGCACCGGCCGTGGTGCCAGCTCGGCATCTTGATCAAGTCGGTCGAGG  
TGTTGGAACGAACGCGCCGGATCACACGGTGGTGTTCGACAAGACCGGCACCCTCACGAGGGAGCGAT  
GTCGGTGACCGACATCGTCACCGCCGACGACACGACCTCGGTGCAACTGCTGGCGAAGGCGGGAGCGGTC  
GAGGCCGACAGCGAGCATCCGATCGGCCAGGCGATCGCCGAGGCCGCTCGCGCCGAGCACGGCTCGCTCG  
ACGCGGTGACCGCGTTCGAGACCATCGTCGGTCACGGCATCCGTGCCGACGTCGACGGCACACGGTCTG  
GGTCGGGCGTCGCGAGCTGGCGTCGAGGCATCGCTCGTACTCCCCGACGCGCTCGACGCCGACGCGGCG  
GAACTCGAAGCGCAGGGCCGAACGGCGGTGTTCCCGGTTGGGACGGCCGGTCCGAGGCGTGATCGCCG  
TCGCCGACACGCTCAAGTCCGAGCCGTCGACACGGTGCAGCAGCTCCACGATCTCGGATTGACCGTCGC  
CATGATCACCGGCGACAACCTCGCGCACTGCGCAGTCGATCGCGGACGCCGTCGGCATCGATCGGGTGATC  
GCCGAAGTGCTGCCCCAAGACAAGCATCGCGAAGTGCAGCGCCTGCAGGAGTCGGGGGAGGTCGTCGCCA  
TGGTCGGTGACGGGGTCAACGATGCGCCGGCCCTGGTCCAGGCCGACCTCGGTATCGCCATCGGCACGGG  
CACCGATGTGGCGATCGAGTCCAGTGACCTCACGTTGCTCCGCGGCGACGTCGACGGCGTCGTCACCGCC  
ATCGAGTTGTCGCGCCGCACCTACCGAACGATCGTCCAGAACCTCGGCTGGGCGTTCGGGTACAACACGA  
TCGCCATTCCGCTCGCCGTGGCCGGTCTGCTCAGCCCGATGATCGCCGGTGCCGCCATGGCGTTCGCTC  
GATCAGCGTGGTCGCCAACAGCATCCGCCTTCGCCGCTTCGGCCGACAAAGGCCAGCACCGCAACGCC  
ACCGAATCCAGGAGCACCTCATGA

>gi|336115651:4625905-4628187 *Microlunatus phosphovorus* NM-1, complete genome\_82

ATGACCGAGTCGGCGGCTGAAGTCCAGCAGCTGGGGTCGAGCTATGAGCTGGAGATCGGCGGCATGACGT  
GCGCGTCGTGCGCGAACCGGATCGAACGGAAGCTGAACAAGCTGGACGGTGTGACCGCTTCGGTCAACTA  
CGCCACCGAGAAGGCGAAGGTTCGAGGTCCCGGCCGTTACGATCCGGCGCTGCTCATCACCGAGGTCGAG  
AAGACCGGCTACACCGCCACCCTGCCAGCCCCAAGAAGGTCTCGACAACCTCGGCCGGGGCGATCGGCA  
CTGGCGAGGATGAGGTCGATCACGAGCTGGTGTGCTGCGGAACCGGCTGATCGGGTCGGTCGTGCTGGC  
GGTGCCCGTCATCGTGTGGCGATGCTTCCCGCACTGCAGTTCACCTACTGGCAGTGGGCCTCACTCGCC  
CTGGCCGCACCGGTGATCGTCTGGGGCGCCTGGCCGTTCCACAAGGCGGCCTGGACCAACCTGCGCCATG  
GCGCAGCGACCATGGACACCTTGATCTCGCTGGGCACCACGGCGGGCTTCCTGTGGTCGCTGTATGCGCT  
GTTCTTCGGCACTGCCGGCGAACCGGGCATGACCCACCCCTTCGAGTTGACCGTCGCCCCAGCGACGGT  
GCCGCCAACATCTACCTCGAGGTCGCGGCCGGGGTGACCATGTTATCCTGGCGGGCCGCTATTTGAGA  
AGCGGTCCAAACGGCAGGCGGGGGCCGCCCTGCGGGCCCTGCTGGAACCTCGGCGCCAAGGAGGTCGCCGT  
CCTGCGGGGGCGGCGTGGAGACGCTGATCGGAGTCGAGGACCTGAGAGTGGGCGACGAGTTCATCGTCCGG  
CCCGGGCGAGAAGATCGCCACCGACGGAGTGATCGTGACCGGTACGTCGGCGGTCGACGCCTCGATGCTGA  
CCGGGGAGTCGGTGCCGGTCGAGGTCGGTGTGCGCGACACCGTCACCGGTGCGACGGTCAACGCCGGTGG  
CCGGCTGGTGGTCCGCGCCACTCGGGTCGGCGCCGACACCCAGCTGGCGCAGATGGCGAAGCTGGTCGAG  
GACGCGCAGTCGGGCAAGGCCGAGGTGCAGCGACTTGCCGACCGGATCTCCGGGGTGTTCGTGCCGATCG  
TGATCGCGATTGCGGTTGGCACACTCGGCGTGTGGTTGGGTGCCGGTTCGGCACGACGGCCGCGTTCAC  
GGCCGCGGTGGCGGTGCTGATCATCGCCTGCCCTGCGCGTTGGGTCTGGCTACGCCGACCGCGCTGCTG  
GTCGGCACCGGTGCGGGCGCGCAACTCGGCATCTTGATCAAGGGCCCCGAGGTGCTGGAGTCGACCCGAA  
AGATCGACACCGTCGTAICTGACAAGACCGGCACGGTGACCAGCGGCAAGATGACCCTGGTCGAGGTGCA  
CACCGCCCCTGACACCGATCGAAGCGAGCTGCTACGGCTTGCCGGAGCGTTGGAGAACGCCTCCGAGCAC  
CCGATTGCCAAGGCCATCGTGAAGGGGGCGGTCGAGGAGGTCGGGGCGCTGCCACACCGGAGGACTTCG  
CCAACGTCGAAGGCAAGGGTGTGCAGGGCATCGTCGACGGGCACGCCGTGCTGGTCCGGCCGGGAGACGTT  
GCTGGCCGAGTGGTCGACGAGCTGCCCGACGACCTGGCCGCGGCCAAGGCCGCCGAGAGCGAGGGC  
AAGACGGCGGTCGCGGTCGGCTGGGACGGTCAGGCTCGCGGGGTGCTGGTGGTTCGCGGACGCCGTCAAAC  
CGACCAGTACGACGGCCGTCGCCAGCTGAAGGGCCTGGGGTACCCCGATCCTGCTGACCGGTGACAA

CGAGACGGTGGCTCGGCAGATCGCCGCCGAGGTCGGCATCGACCGGGTCATCGCCGAGGTGCTGCCCGCA  
GGCAAGGTTCGAGGTCGTGTCCCGGCTGCAGGCTGAGGGCAAGGTCGTGGCCATGGTCGGCGACGGCGTCA  
ACGACGCCCCCGCCCTGGCCCAAGCCGATCTCGGTCTGGCGATGGGCAGCGGCACCGATGTGGCGATCGA  
GGCCTCCGACATCACCTGGTCCGCGGTGATCTGCGCGCGCCGCCGACGCGATTCCGGCTGTCTCGCAGG  
ACCCTGGGCACCATCAAGACCAATCTGTTCTGGGCGTTTCGCGTACAACGTCGCCGCGATCCCCTCGCCG  
CACTCGGTCTGCTGAACCCGATGCTGGCCGGTGCCGCGATGGCGTTCTCCAGCGTCTTCGTGGTCGGCAA  
CAGCCTGCGACTGCGCAGCTTCCGGTCCAACGCCACGAACTGA

>gi|182433793:c5679711-5677288 Streptomyces griseus subsp. griseus NBRC 13350 chromosome,  
complete genome\_83

ATGGCCAGCACAGCAGCAGCCGACTTCCCCACCGCCGAGGCGTCCGAGGCCGAGCTCATGATCGGCGGGA  
TGACCTGCGCCTCGTGCGCCGCCGCGTCGAGAAGAAGCTCAACCGGATGGACGGCGTCACCGCCACGGT  
GAACTACGCGACCGAGAAGGCCCGCGTCACCTTCGGGGAAGGCCTGGAGCTGGGGGACCTCGTCGCCACG  
GTCGAGAAGACCGGCTACACGGCCCCGCCCGTCGCCCGGCCGAGCGGAGGGCGCCGACGCCGTCCGAGG  
CCACCGCTCCCCCGGCCGCCGCCCTCCCGAGCCCCGCTTCCCCGGCCGCGTCCCCGGCCCCGTACGCCGG  
CGAGAGCCCGCCGACGGACCCCGCCACGCCCTCGACGCCACCCCCGCGCGGACCCGGGCCGACCCG  
CGCTCAGCGGACCGGGACGCCGGGGCGGAGCAGGACGCCGCCATCGGCGCGTCCGCCGGCGCCTGGTCG  
TCTCGGCCGTGCTGGCACTGCCCGTGGTCCTGCTCGCCATGGTCCCGGCCCTCCAGTTCGACTCCTGGCA  
GTGGCTGAGCCTCGTCTCGCCGCGCCGGTCGTCTGGGGCGGCCTGCCCTTCCACCGCGCCGCTGG  
ACCAATCTCCGGCACGGTGCGGCCACGATGGACACACTGGTCTCGCTCGGCACGCTCGCCGCGTTCGGCT  
GGTCGCTGTGGGCCCTTCTTCGGCGACGCGGGCATGCCCGCATGCGCCACGGCTTCGACCTACCCT  
CGCGCGGGCCGACGCCGGCTCGACGATCTACCTGGAGGTGGCGGCCGGGGTTCGTACCTTCATCCTGCTC  
GGCCGCTACCTGGAGGCCCGCGCCAAGCGGAGGTCGGGGGCGGCGCTGCGGGCGCTGATGGGCCTGGGAG  
CCAAGGACGTGCGCGTGTCTAGGGGCGGCCGGGAGGTCCGCGTCCCGGCGAGCACGCTCGTGGTCGGGGA  
CCGTTTCGTGGTCCGGCCCCGGGAGAGATCGCGACGGACGGACCGTTCGTGAGGGCTCCTCCGCCGTG  
GACGCCTCCATGCTCACCGGCGAGTCCGTCCCCGTGAGGTCACCACCGGCGACACCGTCACCGGAGCCA  
CCCTCAACGCCGGCGGACGCCTCGTCTGAAGCCACCCGCATCGGCGCCGACACCCAACTCGCCCGCAT  
GGCCAACTCGTCGAGGACGCCAGAACGGCAAGGCCTCCGCACAACGCCTCGCCGACCGCATCTCCGCC  
GTCTTCGTCCCATCGTCATCGCCCTCGCCCTCGCCACCCTCGGCTTCTGGCTCGGCAACGACGCCGGAC

TCACCGCCGCTTACCGCCGCCGTGCGCCGTCCTCATCATCGCCTGCCCTGCGCCCTCGGCCTCGCCAC  
CCCCACCGCCCTCATGGTCGGCACCGGCCGCGGCCAGCTCGGCATCCTCATCAAGGGCCCCGAAGTC  
CTGGAGACCACCCGCCGCGCCGACACCATCGTCCTCGACAAGACCGGCACCGTCACCACCGGCCGCATGA  
CCCTCCAGACCACCCACACCACCCACACCACCGACACCACCGAAGTCCTCCGCCTCGCAGGAGCACTGGA  
GAACGCCTCCGAACACCCCATCGCCCAAGCCGTGCCCACCGCCGACCGCCACCACCGGCCCCCTCCCC  
ACCCCCGAGGACTTACCAACGTCCCCGACTCGGCGTCCAGGGCACCGTCAAAGGCCACGCCGTCTCG  
TCGGACGGCCCCGGCTGCTCGCCGACGCGGCGATCCCCCTCCCGCCGGTGCTGGAGGCCGCCCTGGCGGA  
GGCCGAGGAGCTCGGCCGTACGGCGGTGCTGCGGCCTGGGACGGGGAGGCCCGGGGCGTGTTGCGGGTG  
GCGGACGCGGTCAAGGACAGCAGCGCGGCCGTGCGCGAGCTGCGCGCCCTGGGGCTGAGGCCCGTGC  
TGCTGACCGGCGACAACCGGGCCGTGGCGGAGGCCGTGGCCCGGAGGTGGGCATCGACGAGGTCCACGC  
GGAGGTGCTCCCCGAGGACAAGGTGAACGTGAGGCGGCTTCAGGCCGAGGGCCGGGTGCTGGCCATG  
GTCGGCGACGGGGTCAACGACGCGGCCGCCCTCGCCGCGCGGACCTGGGGCTGGCGATGGGCACCGGGA  
CGGATGCGGCGATCGAGGCGAGCGATCTCACACTGGTTCGTGGAGATCTCAAGGTGACGGCTGACGCAAT  
CCGCCTCTCCAGGCGTACGCTGGCCACCATCAGGGGCAACCTTCTGGGCCTTCGGGTACAACGTCGCG  
GCCTTGCCCTGGCTGCAAGTGGCCTGCTCAACCCTATGATCGCGGGAGCCGCATGGCGTTTTCTGTCG  
TGTTGTCGTCACGAACAGTCTACGGTTGCGTGCCTTACGTAA

>gi|379733551:3228347-3230677 Blastococcus saxobsidens DD2, complete genome\_84

ATGACCACCGCACCCGACGGCACACCACCGACGTCGAGCTGCTCATCGGCGGGATGACCTGCGCCTCT  
GCGCCGCCCGGGTGGAGAAGAAGCTCAACAAGCTCGACGGCGTACCGCCACCGTCAACTACGCGACCGA  
GAAGGCGAAGGTCAGCTACGGCGACGGCGTGAACACCGGGGACCTGATCGCCACGGTTCGAGAAGACCGGC  
TACTCCGCGGCCTCCCCGAGCCCCGCGGCCGGAGATCCCCGCGGAGGCCGAGGCCGACCCCGCCGACG  
CCCCGGTGACGCGCTGCGGACCCGCCTCGTGGTCTCCACCCTGCTGAGCGTCCCGGTGATCCTCATGGC  
GATGGTGCCGGCGCTGCAGTTCAGTACTGGCAGTGGCTGTCGCTGACCCTCGCCGCCCCCGTGGTGGTG  
TGGGGCGGCGCGCCGTTCCACCGGGCGGCCTGGACCAACCTGCGCCACGGCGCGGCGACCATGGACACCC  
TGGTGTGCTGCGTGGGCACGCTGGCGGCCTTCGGCTGGTGTGCTGACGCGCTGTTCTGGGGCACCGCCGGCGT  
CCCCGGCATGACGCACCCGTTTCGAGCTGACCATCGCCCGCACCGACGGCAGCGCCAACATCTACCTCGAG  
GCCGCGGCCGGGGTGACGACGTTTCCTGGCCGGCCGCTGGTTCGAGGCGCGGTCCAAGCGCCGGGCCG



GGCCGCCGGGGTGACCACCTTCCTGCTGGCCGGGCGGTACTTCGAGAGCCGGTCCCGGCGCAGCGCCGCC  
GGACTGCTCGCCGCGCTGGACGCCTTGCCCGCCAAGGACGTCCGGGTGCTGCGGGACGGAGCCGAGCGGA  
TGGTCCCGATCGGCGAACTGGCCGTCGGCGACCTGTTCGTGGTCAAGCCGGGGGAGTCCATCGCCGCCGA  
CGGCGTCGTCCACAGCGGACTGTCCACTGTGGATGTCAGCGCGGTGACCGGTGAACCCGTGCCCGCGGAG  
GTCTCCACCGGGGATCGGGTCATCGGTGCTTCGGTGAACCGGGACGGCAGGCTCGTCGTCCGCGGACCG  
CGGTGCGCACGCATACCCAGCTGGCCCAGATGACCGCGCTCGCGGAACGCGCGCAGGCCCGCAAGGCCGC  
GGTGCAACGTCTGGTCGACCGGATCTGCGCGGTGTTTCGTCGCCCGCCGTGCTCGGCGTGGCCGCGCTGACG  
CTCGCGGTCTGGCTGCTCGGCGGGGCACCCGCGCGCAAGGGTTCGCGGGCGCCGTGCGCGTCCCTCATCA  
TCGCCTGCCCGTGC GCGCTCGGGCTCGCGACCGGACCGCGCTGATGGCCGGGGTTCGGCCGCGGCGCCCA  
GCTCGGCATCCTCATCAAGGGGCCGGACGCGCTCGAGGGCAGCCGCACGGTGGACACCGTCGTA CTGGAC  
AAGACCGGCACCGTCACCACCGGAAGATGACCGTCACCGGTGCCGCCCGCCGACGGGTTACCCACCG  
GCGAGCTGCTGCGGTTCCCGCGGCCGTGGAGGTGCGTTCGGAGCACGCCATCGCGGCGGCCGTGGTGAC  
CGCGGCGCGGGCCGA ACTGCCGGACCTGCCCCGGTTCGAACGCTTCGCCGCGCTGCCCGGGCTCGGCGCG  
CAGGGCGAGGTGAGGGGCACGACGTCTCGTCGGCAACGCGCGGTTGTTCCCGATCGAGGGATCCCCT  
GTGACTCCGCGGCGGCGGACGGCGCGACGGCGATCCTCGTCGCGGTGGACGGCCGGGTGCGCGGGCACCT  
GGAAGTCCGGGACGTGCTGAAGCCGTGCGCACCGGCCCGCTCGAGGCCCTGCACGCGCTCGGCCTGCGG  
ACCGTGCTCCTGACCGGTGACAACGAAGCCGCCGCGCGTGTGGTCGCGGAGGAGATCGGCGTCTCCGACG  
TGC GCGCCGGGGTGTGCCGCGGAGAAGGCCGCGGTTCATCGAGGAACTGCGGGCCGGGGGAGCGCGGGT  
CGCGATGGTCGGCGACGGGATCAACGACGGTCCGGCGCTGGCCACCGCGGATCTCGGCATGGCGATGGCG  
CGGGGCAGCGACATCGCGGTCCGCTCCGCCGACATGGTGTGGTCCGCGAAGACCTGCGCGTGGTCCCCG  
ACGCCATCCGGCTCGCCGACCGCACGCTGCGGATCATCCGGGGGAACTTGGCCTGGGCGTTCGGCTACAA  
CGTCGCCGCGATCCCGCTGGCCGCGCTCGGCCTGCTGAACCCGCTGATCGCCGGGGCGGCGATGTCGCTG  
TCCTCGGTGCTCGTCGTGTCCAACAGCCTCCGGCTCAAGGACTTCCGACGCGCCGCGTGA

>gi|357409266:c:5291699-5290122 *Streptomyces pratensis* ATCC 33331, complete genome\_86

ATGTCTGAAATGCACACTCGCCGCGCCGTGCTCGGCGCGGGTGTGCGCCTGGCCGGAGCAGCGGGACTCG  
CCTCGCAGGCCGTCACCCCCTCCCGGGCCACGCCGCTCCCCGCCGACGCCCGCCCCCTCCCCGCGCG  
AGCCGCCGACCAGTACGTACGCCCCGACGGTCCCAGGTGGTGGACGCCGAGGCCCGCCGGGGTGGCCGC

CCGGTGCGGAAGGTCTCGCTGACCGCCACCTCCTCGCGCCTGGAGCTGGGCGGCGGCCTCACCGTCCCCA  
GCTGGGCCTACGGCGACCGCTGCCGGGTGAGGCGATCCGGGTACCGCGGGCGAGATCCTCGAACTCGC  
CCTGGCCAACAACCTGCCGAGGCCACCACGATGCACTGGCACGGTCTCGCCCTGCGCAACGACATGGAC  
GGCGTGCCGGCGCTGACGCAGCAGGCGGTGAAGGCGGGCGCCGACTTACCTACCGTTTCGCGGTACGCC  
ACCCCGGGACCTACTGGATCCACCCGCACTCGGGCGTGCAGCTCGACCGGGGCCTGTACGCGCCGCTGAT  
CGTCGAGGACCCGAAGGAACCGCTCGCGTACGACAAGGAGTGGGTCTGTCGTCCTCGACGACTGGCTCGAC  
GGGGTGGACGGCTCCACCCCCGACGCGGTCTCGACGAGCTACCGAGGGCCGGGGGTCCGCCCATGACG  
CCACCGGCCACCAGGCGGCCCGCCGCGCGGCCGACGGCGACGCCCCCTCGCGGCTCCTCGTCGGCGCGAG  
CAGCGATCTGCTCGGCGGCCACGCCGGCGACGTGCGCTATCCGCACTACCTGGTCAACGGCCGCAGGGCG  
AGCGACCCTTCGGTCTTCGAGGCGGCTCCCGGGACCGCATCCGGTCTGCGGTCTGCAACGCCGGCGGGCG  
ACACCGCGTTCCGGCTGGCGCTCGGGGGCCACCGGATGACGGTGACGCACACGGACGGCTTCCCGGTGCG  
GCACACCGAGACCGACACCCTGCTGCTGGCGATGGGTGAGCGGTACGACGTGCTGGTGACCGCGGGGGAC  
GGGGTGTTCGGCTGACGGCGCTCGCCGAGGGCAAGGAGGCGTCTGCGGCTGGCCGTGCTGAGGACGGGGC  
CGGGAGCGATCCCGCTGCCACGGTGC GGCCCCGCGGAGCTGGACGGCGAGCTGGTCACGGCCGACCGGCT  
GGCCCCGGACGAGGCGGTGGCACTGCCGGAGCGCGCACCCGACCGGACCGTGCGCATGACGCTCACGGGT  
TCCATGGACGCCTACGACTGGGCCTTCGACGGCAAGCCCTACGACCCGGCGGTCCGGCATCCCGTCAAGG  
CCGGGGAGCGCGTGC GACTGGTCTTACCAACCGCACCGCGATGTGGCATCCGATCCATCTGCACGGCCA  
CACGTTTCGCGATGGCCGGCACGGCGCTCGGCGCCCCGCAAGGACACCGCCGCGGTCTGCCCGGACGCTCG  
CTGACGGTCGACTTCGACGCGGACAACCCCGGCCTGTGGATGCTCCACTGCCACAACGTCTACCACGCCG  
AATCCGGGATGATGACGGTCTGGGCTACCTGCGCTGA

>gi|300781937:c7214944-7212716 *Amycolatopsis mediterranei* U32 chromosome, complete genome\_87

GTGATCGGCGGCATGACCTGCGGGTCTGTCGCCGCGCGGATCGAACGCAAGCTCAACCGGCTCGACGGCG  
TCGAGGCCAGCGTCAACTACGCCACGGAGAAGGCCACGTGCGGGTCCCGCCGTGATGACGACCGACGA  
CGTCATCCGCGCGGTGGAGGCGGCCGGCTACACGGCCGCGCCACCCGACACCGCGGTCCGCGGAGACG  
GCCTCCGAGCCGTTGCCGTCCGACGCGCTGCGCCGCCGCTTGCAGCTGTCAGCGCTGTTCCGGTGCCCCGG  
TGATCCTGGCGGCCATGGTGCCGGTCTGTCAGTTCGCCGCTGGCAGTGGGTTTCCCTGGTCTGGCCAC  
GCCCCGTGGTGGTGTGGGGCGCGTGGCCCTTGACCGCGCCGCTGGACCAACCTCCGCCACGCCACCGCG

ACCATGGACACCCTGGTGTGATGGGCGTGGCCGCGCCTACCTCTGGTCGCTCTACGCGTTGTTCTTCG  
GCGGGGCCGGGGTTCATCGGCATGCGACACGAGTTCGAGTTCACCCTCTACGCCGACCACAACGTGACGG  
GATCTACTTCGAGGTCGCCACCGGCGTCACGCTGTTTCATCTGGCCGGCCGCTACTTCGAGTCCCGGTCTG  
CGCCGCCGGGCCGGTTCGCGCGTTGCGGGCACTGCTCGACCTCGGCGCGAAGTCCGTGCGCGTCTTCGGG  
ACGGCCGCGAAGAGCGGATCCCAGTACGACAGCTGAGGACCGGCGACCTGTTTCGTGGTCCGGCCGGGGGA  
GAAGATCGCCACCGACGGCGTGGTTCGTCGACGGCGCCTCCGCGGTTCGACCTCAGCCTGGTACCGGGGAA  
GCCGTGCCGGTTCGAAGCCGGTTCGCGCGCCGAGGTGGTTCGGCGCGACGGTTCAGCATGAGCGGGCGGCTCG  
TCGTGCGCGGACCCGCGTTCGGCACCGAGACCCGGCTGGCGCGCATCGCGGCGATGGTTCGAACGCGCCCA  
GAGCGGCAAGGCCGATGTGCAGCGGCTCGCCGACCGCGTTCGCGGGTTCGTGCCGATCGTGATAGCG  
CTTTCGTGGTGACACTGGGGTTCTGGCTCTTCTCGGGCGCGGGGGCCGGGATGGCGTTCACCGCCGCGG  
TCGCCGTGCTGATCATCGCGTGCCCGTGTGCTTTGGGGCTGGCCACACCGACCGCCCTGCTGGTGGGCAC  
CGGCCGCGGCGCCAGCTCGGTGTGCTGGTCAAAGGACCGGAGATGCTGGAGTCGACGCGGCGGGTTCGAC  
ACCGTCGTGCTCGACAAGACCGGCACGGTGACCACCGGGAAGATGACGCTGGCCGGGGTCAAGACCGTCG  
ACGGCGTGCCCCGGACCTGGCGTTGCAGCTGGCCGGGGCGCTGGAAAGCGCGTCCGAGCACCCGATCGC  
GGTCGCGGTACCGACGCGGCGCGCCGCGCTTCGGCGACGTCGGGCAGGTGCGGGAGTTCGGGGCCGTC  
GCGGGCTACGGCGTGCTCGGCCGGGTGGACGGCCACCGCGTCGTCGTCGGCCGGCCGAAGTCTGTCAGA  
AGATGTCGGTCCGGGTGCCGTGCGCGCTGTTCAAGGTGAAGCAGCAGGCCGAACGGGCCGGGAACACCGC  
GGTCTCTGGCTTGGGACGGTTTCGCGCACGCGGTGCTGGTTCGTGGCCGACACGGTGAAGCCGACGTCG  
GCTCCGGCGGTCTTCCAGCTGCGCCGGCTCGGCCTACCCCGGTGCTGCTCACGGGCGACAACGAAGCCG  
TGGCCCAGTCGATCGGGCAAGAGGCCGGGATCACCGAAGTATCGCCGGGGTCTCACCGGAACAGAAGGT  
CGAGGTGATCGCGGATCTGAAGGCCAGGGCCGGGTGGTGGCGATGATCGGCGACGGCGTGAACGACGCA  
GCCGCGTGGCCACCGCGGATCTGGGGCTGGCGATCGGCACCGGCACGGACGCGGCGATCGAGGCGGCGG  
ACCTGACGCTGGTCCGCGGCGATCTGATGGCCGCGGTTCGACGCGATCCGGTTGTCGCGCCGGACGTTGGC  
GACGATCAAGGCGAACCTGTTCTGGGCGTTGGCCTACAACGTGGCCGCGTTGCCGCTGGCGGCGGGGGG  
CTGCTGAACCCGATGATCGCCGGGGCGGCGATGGCGGCGTCGAGCTGCCTCGTGGTCTCGAACAGCCTGC  
GCCTACCAGGTTTCGGGGAACAGCCGCGGCGCAGCCACTGCTCGAACCCCGCTCGTGA

>gi|473832060:1026665-1029094 *Clavibacter michiganensis* subsp. *nebraskensis* NCPPB 2581  
complete genome\_88



GTGACCGACACCGCATCCGGATCCGCGCCCGTCGCGGGCCCCGTGCGCCGCCCTGCCGAGGAGGGCGTCG  
TGCTCACGCGCGTCGACCTCGACGTGCAGGGCATGACGTGCGCGTCGTGCGCGATGCGGATCGAGCGGAA  
GCTCGGCCGGATGCCCGGGTTCGAGGGCGTCCGTCAACTACGCCACCCATCGGGCGCGCGTGCAGCTGCC  
GCGGGCACGAGCGTCGAGGACGCGATCCGCACCATCGAGCGGACGGGCTACCGCGCGTCCGAGCGCGCCG  
GGTGGGGGAGCGGGGCGGGAGATGACGCGTCCGCGCCCGTCGCGTCCCGACCGGGGAGCCCGCGCCCGT  
AGCGGTCGCGGCTCCCCGCGTCCGACCCGACGCGCCCGACGCCGGCGGTTTCGTATCCCGCATCCGCGCCG  
TCGCCACGCCCCGCCCCGGCAGCGCCCCCGCCGCCCGCCCGACGCGGACGAGCTCGCGCTCCGGCAGC  
GGCTCCTGGTCTCCGCGTCTCACCGTCCCCGTCTTCTCATGGCGATGATCCCCGCGCTCCAGTTCGA  
CGACTGGCAGTGGCTGTCCCTCGCGCTCGCCGCGCCCGTCGCCGTCTGGGGCGCGTGGCCGTTCCACCGG  
TCCGCCCGCGTCAGCGCGCGCCACGGCGGCGTCCGGCATGGACACGCTCGTCAGCATCGGCGTCCGGCCG  
CCTTCTCTGGTCCCTCTACGCGCTCTTCTCGGGCAGCGGGCGAGCCCGGCATGCGCATGACCATGAG  
CCTCGTCGGCGAGCCCGGGCGGCGATCCGGCGACGTGTACCTCGAGGTCGCCTCGGCCGTACGGTGTTT  
CTCCTCGGCGGCCGCTACCTGGAGGCCCGGGCCGCGCGCGTCCGGCGCCGCCCTCGCCGCGCTCCTCG  
ACCTCGCCGCAAGGACGTGGCCGTGGTCCGCGACGGCGTGGAGACGCGGATCCCATCCGCGACCTGCG  
CGTCGGCGCGGAGTTCGTGTCGTGCGGCCGGGCGAGCGCATGCCACCGACGGCGTGGTTCGTGACGGGTCC  
AGCGCCGTGACCGCTCCCTGCTACCGGGCAGTCCCTTCCCGTGGAGGTCGGCCCCGGCGACGACGTCA  
CGGGCGCGACCCTCAGCGCCGGCGGACGCCTCGTGTGCGCGCCACGCGCGTGGGCGAGGAGACCCGGCT  
CGCCCGCATGGCCGCGCTCGTGGAGGAGGCGCAGACCGGGAAGGCCCGGATCCAGCGCCTCGCCGACCGC  
GTCTCCGCCGTCTTCGTGCCCGTCGTGCTCGTGTGCTCGCCGTCCGTACGCTCGTCCGGTGGTGTGCTGCTG  
GCTTCCCCGCGGAGGCCGCCTTACCGCCCGCGTGGCGACGCTCATCATCGCCTGCCCGTGCGCCCTCGG  
GCTCGCGACCCGACCGCGCTCCTCGTGGGCACGGGCGCGGCGCGCAGCTCGGGATCCTCATCACCGGC  
CCCGAGGTGCTCGAGTCCACCCGCCGATCGACACCGTGTGCTCGACAAGACCGGCACGGTACGACGG  
GCGTCATGTGCTCGTGTCCGCCGTCCCCGCGGCGGGCGTCCGACTCCGACGAGCTCGTGCGCGTCGCCG  
CGCCCTCGAGGCGCGGTCGGAGACCCGGTCGCGCGCGCCGTGTCGAGGCCGCGGGCGGGCGGATCCCTC  
CCTCCCGTGGAGGGCTTCGTGCCACCGCGGGCCTCGGCGTCCACGGTGTGTCGACGACGCGCGGTCG  
CGGTCGGGCGCCCTCGTGGCTCGCGGAGCAGTGGGCCCGAGCCCGACGCGGCGTCCGCCAGGCGTC  
GCGGGACCCGAGGCGGATGGATCCACCGTGTGCGGTCGCGTGGGACGGCGCCGTCCGCGGGACCCCTC

GCCGTCGCCGACACCGTCAAGCCCACGAGCGCCGAGGCCGTCCGCCGCATGCGTGCGCTGGGCCTCCGTC  
CCGTCCTCCTCACGGGCGACGCGGGCGGCCGCGCACCGCGTCGCCGCGGAGGTCGGCATCGACGAGGT  
CATCGCGGGCGTGCTCCCCGAGGGCAAGCTCGACGCCGTGCGTCGCCTGCAGGCCGAGGGCCGCGTGGTC  
GCGATGGTCGGCGACGGCGTGAACGACGCCGCCCTCGCGCAGGCCGACCTCGGGATCGCGATGGGCA  
CGGGCACCGACGCGGCCATCGAGGCGGGCGACATCACGATCGTCCGCGGCGACCTCGTGCTCGTGGCCGA  
CGCCGTGCGCCTCGCGCGGCGCACGCTCGGCACGATCCGCGGCAACCTGTTCTGGGCCTTCGCCTACAAC  
GCGGCCGCGATCCCCGTGGCGATGCTCGGCCTCCTCAACCCGCTCGTCGCGGGCCTGGCCATGGCGCTCT  
CGTCGGTGTTGTCGTCACGAACAGCCTGCGCCTGCGCTCCTTCCGCTAG

>gi|239916571:c1982520-1980955 Micrococcus luteus NCTC 2665 chromosome, complete  
genome\_89

ATGACCTCCTCACTGACCACCCGCCGACCTTCTGGGCGCCTCCGTCGGGGCCCTGGCGCTGGCCGGGC  
TGCCCGCTGCGCCGATCCCGCCATCAGCCCCAACCGTCAGGGCGCATCCTGCCACCGACCCGCTGGT  
CGCCGAGTACGAGAAACGACGCGCCGCTCGGGCACCAACCGTCACCCACCGGCTCTCCGCCGACCCCTC  
GAGACCTCCCTCCAGGGTCGGGGCCTGACCACCTGGGGATAACAACGACGGCCTCAACGGGCCGCTGCTGC  
GCGCCCAGACCGGGGACCTGCTCAAGGTCAGCGTCGCCAACGACCTGCCGAGGACACGAGCGTGCACTG  
GCACGGGCTGGCCCTGCGCAACGACGCCGACGGAGTCCAAGGAGTGACCCAGGACCCCATCGCCGCCGGA  
GAAACCTATACGTACGACTTCCGGCTGTCCATCCGGGCACGTAAGTGGTACCACTCCCACTTCGACACCC  
AGCGCGAACGCGCCCTGTACGGGGCCCTGATCGTCGAGGACCCCAACGAGCCCCTCAGCTACGACCAGGA  
ATGGGTCGTGATCCTGGACGACTGGCTCGACGGGATCACCGGAACACCGCAGGACGTCGTCGAGGAACTC  
TCCGCCGGGATGGACATGTCCGGCGACATGGAGGGCATGGCCGGCATGGCGGGCATGGACCACGGGTCCA  
TGAGCCAGGACAGCTCCTCGGGCATGCCATGAAGCACATGCTCATGGGCGCTGAGAGCGACTATCTGGG  
CGGGGACGCCGGCGACGTGAAGATCCCCGTGCACCTGTTCAACGGCCGCCCCCATCCGACCCGGACACC  
TTCTCCAGCACCCCGGGCAACCGGATCCGCTGCGCTTGATCAACGCGGCCGGAGACACCGCTTACCGGG  
TCGGGATCCCCGGCCAGGAACTGACCATCACCCACACCGACGGGTTCCCGGTCCAGCCCCGCCAGGCCGA  
TGCCGTGTCCTGGGGATGGGCGAACGCCTGGACGTGCTGATCACCTCGGCGACCAGGCGGTGCCCGTA  
CTGGCCCTGCCCAGGGCAAGACCGGCCACGCCTACGGCATCATCGCAGCCGGTCCAAAGACCACGCTCT  
CCGGTCGGCTCCCGCAGACCCTGGGCGGAACCGTGTGTCGATGGCAGCCGACTGAAGGCACACGAATCCGT  
CCTGCTCCCGCCCAAGGACCCGACCAGGACCCACGAGGTACGCCTCACCGGGTCGATGATGGAGTACGAC

TGGGGCATCAACGGGCGACGCTTCGACCCGGCCAACCCCTTCGAGGGCGCCTTCGAACTCCGGTTGGACG  
AACGCGTGCGGGTCACGATGACCAACGACACCGACATGTGGCACCCCATGCACCTGCACGGCCACACCTT  
CCAGCTGGCCGACCATGGCGCCCGCAAGGACACGGTCATCATCAAACCCCGGCAAACCATCGTCTTCGAC  
TTCGAGGCGGACAACCCGGGCCAGTGGCTAACCCTGCCACAACGCCTACCACGCCGAGGCCGGGATGA  
TGGGCGTCTTCTCCTACATCCACTGA

>gi|403525101:4634133-4636562 *Arthrobacter* sp. Rue61a chromosome, complete genome\_90

TTGAGTAGCCAGGAGACTTTCAACCAACCCGCACACAGGGTCATCGAGCTGGACATCGAGGGCATGACCT  
GCGCCTCGTGTGTC AATCGAGTGGAACGAAA ACTGGGAAA ACTCGAGGGTGTAGAGGCCAGCGTCAACCT  
GCCCTCGAATCAGCCACGTCACAGTCCAGCATCAGTGACGGATCAGCAGATCGTGGACACCGTCAAT  
GCCACCGGCTACAAAGCCACCGTCCGCCAAGCCCCGGCGGCCACGGACACACCTCCACCAAACAAACCC  
ACGATCGTGGCGCCGCTGTAACGATGCCACGCGGCGAAGCCGGCGGCGTGCGGCAGCATGCGTCTAAGGG  
AGGCACGACCGAGCATGCAGAGCACGGCGCCGACTTCGCCGCCAAGCCAACCACGGCGAGCACGGCGAG  
CACGCTACACACGAAGACCACATGGCTCACGGCCCAGCAGCCTTACTACTGCGCCCCCGCCTGATCGTCG  
CGGCCCTCCTGACCATCCCCGTGTTGCAATCTCCATGATCCCCGCGTTGCAGTTCGCCAACTGGGGATG  
GGTTGTAGGTGCGCTTGCCTACCAGTGGTGAGCTGGGCGGCCTGGCCCTTCCACCGGGCAGCGGCCATC  
AACGCACGGCACTTCGCTTCCACCATGGACACGCTCGTTTCCATTGGCGTCATCGCCGCTACCTCTATT  
CGGCGTGGCAA CTCTTTGTGGATCCCCGGATGACCGAACACCCCGGCATGGAAAACATGTCCGGTGGTGG  
CCTCTACTTTGAGGTCGCTGCGGTGGTCACAACGTTCTGCTTCTGGGTCGCTACCTGAAGCCAACGCC  
AAGGCCAAAGCGGGCAATGCCCTCAAGGCACTGCTGAATCTGGGCGCCAAGGATGCAACCATCCTGGTGG  
ATGGCGTCGAGCAGAAGATTCCCGCGGATCAGCTCCTCGTGGACGACGTCATCGTTGTCCGCCCGGGCGA  
AAAGATCGCTACCGACGGCGTGGTCACGGACGGTGCATCCGCCGTCGACGCCTCACTTGTACGGGCGAA  
TCGGTGCCGGTGGAGGTTGGACCGGGCAGCTTGGTGACGGGCGCTACCATCAACACTTCCGGCCGGCTGC  
TGGTCCGGGCCACCCGCGTGGGCTCCGACACTACGCTCGCCAGATGGGGCGTCTGGTCAGTCAGGCGCA  
GACGGGCAAGGCGCCATTGCGCGGCTCGCTGACAGGATCAGCTCTGTCTTCGTCCCGATTGTCTGGTT  
ATCGCCCTGGCCACGTTCTTCTGTGGCTGTTCTTCTCGGGCGACCTCAACGCAGCCTTACCGCCGCCG  
TCGCCGTCCTGGTCATCGCTTCCCCTGCGCCCTGGGCTGGCAA CTCCCGTCGGGCTACTGACGGGGAC  
GGGCCGCGGAGCTCAGCTGGGCATCCTCATCAAGGGCCCTCAGGTTCTTGAGGACACTCGCCACGTGGAC

ACCATCCTGCTGGACAAGACGGGCACCGTGACCAGTGGCAAGCTCGCTGTGGACCACACAACGGGCCTCA  
ACGGCTACTCGCCGGCCACCGTCTTGACGTTGGCCGGAGCGGTTGAGTCGGCATCAGAGCATCCGATCGC  
GCACGCAATTACGGCCGCGGCGAAGGACGCCATGCGCGACGCCGGCACTCTCCCTGGTGTGACGGCTTC  
AGTTCCGCTCCCGGCGGCGGCGTCAGGGGGTCCGTTGCAGTTGACGGGGTCTCCAAGATGGTGGTCGTCG  
GACGCTCGGGCTGGCTGGAGGAGAACGGCATCCCGCTCGATTCAAGCCAACGGGAAGCCCTCACGGCCGA  
AGAAAACGGCGGCGCCACTGCTATCTGGGTTGCGGTGGACGGCAAGGCCGCGGAATCGTGAGCCTGAGC  
GACACCATCAAACCTGGCTCGGCAGCTGCGATACAGAAGCTTAAGGGAATGGGAATTCGGCCCATCTGC  
TGACCGGCGACAATGCTGCAGTTGCCGCCAGGTGGCTGCCGCCGTCCGGATCTCACCGGACGACGTGTT  
CGCCGGCGTACTGCCGGAGGGGAAAGTTGAGGCGGTGAGGAAGCTGCAGGCATCCGGTGCAGCGTTGCC  
ATGGCCGGTGACGGCGTGAACGACGCCGCGGCCTTGGCACAGTCGGACCTTGAATCGCGATGGGATCCG  
GCACGGATGTGGCGATAGAAGCCTCGGATTTGACGGTGATGGGCAGTGACCTGGGTCAGCTGGTGCAGGC  
GATTGAGCTGTCCCGCAAGACTCTGTCCACCATCAAGACCAACCTGTTCTGGGCGTCTTCTACAACGCA  
ATCGGCATCCCGGTGGCAGCACTCGGGTTCCTGAACCCGATGATCGCCGGCGCAGCAATGGCAGCCAGCT  
CGGTGCTGGTAGTAGCGAACTCGCTGAGGCTGCGCTCGTTCGGTAAGTAG

>gi|256823905:c485969-484404 Kytococcus sedentarius DSM 20547 chromosome, complete  
genome\_91

ATGACCTCCTCACTGACCACCCGCCGCACCTTCTGGGCGCCTCCGTCCGGTCCCTGGCGCTGGCCGGGC  
TGGCCGCTGCGCCGATCCCGCCACCAGCCCCAACCGTCAGGGCGCATCCTGCCACCGACCCGCTGGT  
CGCCGAGTACGAGAAACGACGCGCCGCTCGGGCACCACCGTCACCCACCGGCTCTCCGCCGACCCCTC  
GAGACCTCCCTCCAGGGTCCGGGCTGACCACCTGGGGATAACAACGACGGCCTAACGGGCCGCTGCTGC  
GCGCCCAGACCGGGGACCTGCTCAAGGTCAGCGTCGCCAACGACCTGCCCGAGGACACGAGCGTGCCTG  
GCACGGGCTGGCCCTGCGCAACGACGCCGACGGAGTCCAGGGGGTGACCCAGGACCCCATCGCCGCCGGA  
GGACGCTATACGTACGGCTTCCGGCTGTCCCATCCGGGCACGTAAGTACCCTCCACTTCGACACCC  
AGCGGAACGCGCCCTGTACGGGGCCCTGATCGTCGAGGACCCCAACGAGCCCCTCAGCTACGACCAGGA  
ATGGGTCGTGATCCTGGACGACTGGCTCGACGGGATCACCGAACACCGCAGGACGTGTCGAGGAACTC  
TCCGCCGGGATGGACATGTCCGGCGACATGGAGGGCATGGCCGGCATGGCGGGCATGGACCACGGGTCCA  
TGAGCCAGGACAGCTCCCCGGGCATGCCCATGAAGCACATGCTCACGGGTGCTGAGAGCGACTATCTGGG  
CGGGGACGCCGGCGACGTGAAGATCCCCGTGCACCTGTTCAACGGCCGCCCCCATCCGACCCGGACACC

TTCTCCAGCACCCCGGGCAACCGGATCCGCCTGCGCTTGATCAACGCGGCCGGAGACACCGCCTACCGGG  
TCGGGATCCCCGGCCAGGAACTGACCATCACCCACACCGACGGGTTCCCGGTCCAGCCCCGCCAGGCCGA  
TGCCGTCGTTCTGGGGATGGGCGAACGCCTGGACGTGCTGATCACCTCGGGCACCAGGCGGTGCCCGTA  
CTGGCCCTGCCCGAGGGCAAGACCGGCCACGCCTACGGCATCATCGCAGCCGGTCCAAAGACCACGCTCT  
CCGGTCGGCTCCCGCAGACCCTGGGCGGAACCGTGCTCGATGGCAGCCGACTGAAGGCACACGAATCCGT  
CCTGCTCCCACCCAAGGACCCGACCAGGACCCACGAGGTACGCCTCACCGGATCGATGATGGAGTACGAC  
TGGGGCATCAACGGGCGACGCTTCGACCCGGCCAACCCCTTCGAGGGCGCCTTCGAACTCCGGTTGGACG  
AACGCGTGCGGGTCACGATGACCAACGACACCGACATGTGGCACCCCATGCACCTGCACGGCCACACCTT  
CCAGCTGGCCGACCATGGCGCCCGCAAGGACACGGTCATCATCAAACCCCGGCAAACCATCGTCTTCGAC  
TTCGAGGCGGACAACCCGGGCCAGTGGCTAACCCTGCCACAACGCCTACCACGCCGAGGCCGGGATGA  
TGGCGTCTTCTCCTACATCCACTGA

>gi|148241099:250863-253139 Synechococcus sp. RCC307 chromosome, complete genome92

ATGGCTCCAGAAGCGCTACTTCTTGATATCGAAGGCATGAAGTGCGGCGGCTGCGTCAGCGCTGTGGAGA  
AGCGCCTGCGCGCCCAACCCGGGGTTCAGGAGGCCAGCGTCAATTTGCTGAGCCGCTCGGCTTGGGTGGA  
ACTCGAGCCCCCTGCAACGGCGGAATCCTTGCTGGAAAGCCTGGCCGCCCTTGGCTTTCCAGGCCATCTG  
CGCGATCCAGACGGTGAGCTGGAGCGCCTGCAGCAAGCCCGCCAGCAGAGCTGGTGGAGCTGCTGGC  
GACAGCTGGTGGTGGCGCTGGTGTGCTGTTGATCAGCAGTGCCGGCCACCTCAGCAGTGGCGGTGTGCT  
CGCCGATATGCGCCTGCACGCCCTGGTGGCCACAGTCGCTTTGGCCGGCCCGGGCCGGCCGATCTTGGTG  
CGCGTTGGAAAGGCTTGGCCAGGGCGTTCCTGGCATGGACAGCCTGGTGGGCTTGGGCGTGGGCACGG  
CCTATTTGGCCAGCATGGTGGCTTTGATCTGGCCCTCGGTGGGCTGGTCTTGCTTTTTCAATGAGCCGGT  
AATGCTGCTCGGCTTTGTGCTGCTGGGCCGCTTTTTGGAAGCCCGCGCCCGCCGCGCACAGGCGCTGCG  
CTGGAGGAGTTGGCGCAATTGCAGCCTGAAACGGCCCTGTTGCTGCTGGGGGATGGCTCCACCCGCAGCA  
TCCGCGTGGGTGGGCTGCGGCCCGGCGATCATCTGCGGGTGTCCCGGGTGATCGTTTACCCGTTGACGG  
GGTGGTGTGATCGATGGCAGCTCATCGCTGGATGAATCGAGCCTCACCGGCGAACCATTGCCCCGCAGCGTG  
GCCAGTGGTGTGATGAATTGGCTGCCGGCAGCCTCAATTTGCAGGCGCCGCTGGATCTCAAGGTGCTCAGGC  
CGGGATCGGAATCAGCGCTGGCCCGGGTGATTGCCCTGGTGGAGCAAGCCCAGGCCCGCAAGGCACCGGT  
GCAGGCCATGGCGGATCGCTGGGCGGGCCGCTTACCTGGATCGTGTGCTTTGGCCCTAGCCACGTTT

CTGTTCTGGTGGCTGCTGGGCAGTGATCTCTCCCTCAGGTGCTCGATGGCATGGCCCATGGCCCCGGCC  
ATCACCGCAGCTTGGGCAGTGGCGCTGAAACTCCCTTCGCCCTGGCCTTGCAGTTGGCCATTGCTGTGCT  
GGTGGTGGCTTGCCCGTGC CGCTTGGGGCTGGCCACCCCCACAGCCATCAGCGTGGCCACTGGCCGCGCC  
GCCCATTTGGGCCTGCTGTTCCGCGGGCGGCGATGTGCTGGAGGTGGCTGCTTCGGTGC GCACGGTGTTC  
TGGATAAAACCGGCACCCTCACTCGCGGCCGGCCCCTGCTGGAAGACCAGCTGGTGATCGCCGATGGCCT  
GGATGCTTCGGGTTTGTGCAACTGGCTGCGTCCTTGGAGCAAACCACCCGCCACCCCTTGGCGTGGGCG  
CTGCTGCAGGCCGCTGAAGGCCAGGGCTTGAAGTGTGCTGAGCTGCAGCAGCAGCACCACCCAGGCCGGCG  
ATGGCGTCGAGGGACAGTTGGATTCGCAGCAGCAGCTCTGCCGTTTGGTTCGTTTGGCCTGGCTTGAGCA  
CCACGGTGTTTCATGTGCCTGCCATGGCCAGTGCATGGCAGCAGCAGCAGGAGCAGGGCGGGGCCACGGTG  
CTGGCCTTGGCCCATGGCCAGGAGCTGTTGGGGCTTTTGGCCGTGCGCGATGCCATGCGCCCCGATGCGG  
CTGAGGCCCTGGCCAGTTGCGCAGCGATGGCTTGGCCTTGGCCGTGCTCAGCGGTGATCGTGAGGGCCC  
CGTTCGGCAGCTCGGCCAACAGCTTTCTCTGCAGCCGGATCAATTGGCTTGGGGGCTGCGGCCTGAGCAC  
AAGCTCCAGCGTTGCATCAGGCCTCTGGCCCGGTGGCGATGGTGGGTGATGGCCTCAATGACGCCCCAG  
CCTTGGCGGCGGCTGATCTCGGCATTGCGGTGGGAACCGGCACCCAGATCGCCAGGACAGCGCTGATTT  
GGTGGTGCTCGGGGAACGCCTGATGGCAGTGCCGCAAGCATTGGCCTTGGCCCCGCTCAGCCCAGGCCAAA  
ATTCGCCAGAACCTCAGCTGGGCATTGCGTTACAACCTGCTGGTGTGGCCCTTGGCCGCTGGGGTGCTGC  
TGCCAGGCTTTGGCCTCTGCTCACTCCTCCTTTGGCCGCTCTGTTGATGGCACTGAGTTCGATCACGGT  
GGTGGCCAATGCTCTGTTGCTGCGCGCTCCGGCATGA

>gi|554634310:2135703-2137964 *Gloeobacter kilauensis* JS1 chromosome, complete genome93

ATGCAGATGCAACTGAAGATTCCGGCGATGCACTGCGGCGGTTGTGCCAGGCGGTGAGACGGGCTGTGC  
TGGAAGTAGATCCCGGTGCGCAGATAGATGTGGATCTACAAGCGCGCACGGTGCAGATCGAATCGAAGCA  
CCCGGAGGAGAACCTGCACCAGGTTCTCGCCGAAGCGGGCTATCCGCCGAGAAGGCGGGGGAAGCTGAA  
GGTTACGGGCAACAGGCCATAGCGGACGACAGCAGCACCGAAGCTGTAGACGAGCAGGAGGCGGTGTACC  
GGCGGACGATGGGCAAATTTGCCTTTGCGGCGGCGATTGCGGTGCCGGTGTGCTCGTGGGACTGGGAGA  
TTATGTTCCGGCCCTGGCCAGGCTGCTGATGCCTTACCAGCAGGTGGTCGGCCTGGTTTCGGCGGTCTC  
AGCCTGGCGGTCTTGCCTGGTCGGGGGCGGAGTTTTTTAAGGGAGCCTGGCACAACCTCCGCAACCACA  
ACGCCAATATGGACACGCTGATTGCCCTGGGAACCGGGGCGAGCGTGGCTCTACTCGTTCTTTGTCGTCGT

CGCACCGGGGCTTTTTCCGGTGTGCGCGCGCGGCACGTTCTTCGATGTCGCGGTGGTGGTACTGCCCTG  
GTA CTGTTGGGT CAGGCGCTCGAAGCGCGGGCCCGTGGCCGGGCAATGCCGCTTTGGGAGCCCTCCTCG  
ATCTGCAGGCCAAGACGGCGCGGGTGTCTCCGCGACGGCCAGGAAATGGACCTGCCGGTGGCCAGGTGCG  
GGTGGGCGACATTCTGCTGGTGC GGCCCGCGAAAAAGT GCCCGTGGACGGAGTGATTGTCCAGGGCGAA  
TCGGCGATCGATGAATCGGTGCTCACCGGCGAATCGGTGCCGGTGGACAAAAAATCTGGCGACGGGGTGA  
TCGGCTCCAGCCTCAATACGACCGGTGCTTTTTCGGATGCGGGCCACCCGCGTCGGTGAGGAGACTACCCT  
CGCCCAAATCGTGCGTCTGGTGGGCGAGGCCAGAGTACGAAGGTACCGATTGCCCGCTGGTGGACACC  
GTGTCGCGCTACTTCGTGCCCGCGTG GCGATCGTCGCTATCCTCACGTTTTTAGTCTGGTTCAACCTCG  
GTGCGCCCTCAATCTGGCGGTGGTGACGGCGGTGACGGTGCTCGTGATCGCCTGTCCCTGTGCCCTGGG  
GCTGGCGGCTCCTATTAGTCTGGTGGCGGGACTGGGCAGAGCCGCCGAAAACGGCGTGCTGGTGC GCAAT  
GGCGAGGCACTTGAGACGGCTTCCAAGCTTACGACGATCGTGCTCGACAAGACCGGCACGATCACCTCG  
GCAGACCGGAGTTGACCGATGTGCTGCCTGTGGCCGGGTTCAATCTGGATACATTGCTGGCTCTGGCCGC  
CGCCGCTGACCGCAACAGTGAGCATCCGCTCGCTACCGCCATCGTCAAAGGCGCTCAGGCGCGAGGCACC  
CAAGCGGCTGAGCCCGAACGCTTCCGGTCCATTCTGGCCAGGGCGTCGAGGCAACAGTTGATGGGCGAA  
CGGTGCTGGTGGGCAATGCCCGGCTGATGGAGGCCAGAACGTGGCGATGGCAGCCTTCCAGGGCGATGC  
GGCGCGGCTGGCCAACTCGGGCAAGACGGCGATGTTCTGTGGCGGTGGACGGGCAGGCGGCGGGCATTCTC  
GCCGTGGCAGACACGGTGAAACCCGATTCGCTCGCAGCGATCCGGGCTTTCGCTCGGATGGGCATCGAGG  
TGGAATGATCACCGGCGACAACGAGCGCACGGCTCAAGCCATTGCCCGCAGGTGGGCATTGAGCGGGT  
CATAGCCGGGGTGCAGCCCCAGGACAAGGCCAGCAGGTGCAACGGTTGCAGGGCGAAGGGCGCACCGTC  
GGCATGGTGGTGACGGGGTAAACGACGCTCCGGCTCTGGCCAGGCGGATGTTGGTTTTGCGATCGGTA  
CGGGCACCGACGTTGCCATCGAGGCGGCGGACATCACCTGGTTGGCGGCTCGTTGCGCTCGGTGGTCTA  
CGCCATCCAGATCTCGCGGGCCACCCTGGGCAACATCAAGCAGAACCTCTTCGGCGCTTTTATCTACAAC  
AGTCTGGGCATCCCGGTGGCGGCGGGGCTTTTTATCCGCTGTTTGGCTGGCTGCTCTCGCCATCCTCG  
CCGGGGGAGCGATGGCTCTTTCGAGCATTACCGTCGTA CTCAACGCCAGCCGCTGCGGCTTTTTGCTCC  
CAAATCCGTTTCGGAGGCATAA

>gi|257057919:2512523-2514328 Cyanothec e sp. PCC 8802 chromosome, complete genome94

ATGAAAAATCTATTAATAGACGCAACTTTTTAAGGTTAACTACTGGACTAGGTTTAGCCATTGGATTTCG

ATTATTTACTTCCCAGTTACGGCAAACACTGTCAAGCAAATAAAAGCCTCTCAAGATGAGATAAAATATGC  
TGATGTTATTGACTTAACGATTCAGGAAACTAGCCTCAAATTGGCAATAAAACTGCCACTGGAGTAACA  
GTTAATAATACCATTCTGCTCCTTTACTGCGATTAAGAAGGACAAATCGCTAAAATCAACGTTACCA  
ATAACTTAGATCAAGACACTTCTATTCATTGGCACGGTATCATCTTACCGTCGAAAATGGATGGAGTTCC  
TGGGGTGAGTTTTGCGGGAATAAAACCCGGTCAAACCTTTACCTACGAATTCCTGTTATTAGAGTGGA  
ACTTATTGGTATCACAGTCATAGTGGCCTTCAAGAACAACGAGGTCACTATGGTGCAATAATTATTGATC  
CCTTAGAACCTGACCCCTTTGAATACGACAAAGATTATGTAGTCATTTTATCTGATTGGACTGATGAAGA  
CCCCATGATGTATTAGGTAATCTCAAAAAAATGAGTGCCTATTACAATAATCAAAGACGCACCATTGAG  
CATTTATTTGAAGATTCTATGTGGAGAGAAATGCGAATGGACCCACAGATATTGCTGATGTTACGGGTG  
CAACCTATCGCTTTTTAATGAACGGGTTAGTTGCTGAAGATAATTGGACGGCGATTTTTCAACCCGGAGA  
AAAAGTTAGACTCAGATTTATTAATGCTGCGCCATGACTTTTTTTGATGTGCGTATTCCTGGGTAAAGA  
ATGACAGTTGTACAAGCAGATGGACAGAACATTCAACCTGTTACCGTAGATGAATTCGTATTGGAGTTT  
CAGAAACCTATGATGTGATTGTACAACCCAAAAAAGAGCAAGCTTATACTATTTTTGCAGAACTATGGA  
TCGTAGTGGGTATGCAAGTGGAACCTTAGCGATTAATCAAGGAATGAGTGCTCCTATTCTAACTTCGA  
GAACGTCCTGTCCGTTCCATGAAAGATATGGGAATGGATCATGATATGTCAGGACATAATGATCATGGTT  
CTATGAGTCAAATAGTTCCGCAACCGTTGATCATTCTACGATGAATCATGATACTTCAGGACATAGTGA  
TCACGGTTCCATGAATCATAATACCTCCGAAGATAAAGATCAGTTAACCATGGAACATGATATGTTCAAT  
GATGAAGCAGTTCCCAATACTTCCCAAGATTTCCGAGTAGCTAATGCTGGTAGTCCTATGATGGTACAAA  
ATCGCTTAAATGAACCAGGAATCGGGTTAGAAAATACGGGAACTCGTGTTTTAGTTTATAGCGATTTGCG  
TAATATTAACCCGGATATGACCAACGCAAACCTGAACGAGAAATAGAAATCCATTTAACCCGAAATATG  
GAACGGTATATGTGGTCATTTAATGGCAAAAAATACTCAGAAGAAAAGGAAATTACCTTCTACAAAGGGG  
AAAGATTACGGTTAACATTTATCAATCAAACGATGATGGAACATCCCATACACTTACATGGGATGTGGAT  
GGAATTAGATAACGGTTCAGGGAACTATAAACCCCGTAAACATACCGTTGTTGTCAAACCTGCTGAAAAA  
ATGTCTGTTGAAGTGAACGTTGATGTTACTGGTAAATGGCCGTTACATTGTCATCTGCTTTATCACATGA  
AAGTTGGAATGTTTCGGACTGTTGCCATTGCTGATCGTCCTGTTGAGGCTAGTTAA

>gi|434408264:c276672-274756 Stanieria cyanosphaera PCC 7437 plasmid pSTA7437.01, complete  
sequence95

ATGAACAATAAATCTAGTACATTCAATAGACGAACTTTATCCGTTTCACTGCTGGAATGAGCGTAGCAC



TGGGACTCGATAGCCTTCTCCCCGCATATGTCAAACCAGTCGTTGCTGCAAACAAGTCAAAAACCTAAATT  
TGAATATTCCGATCCCATTGACTTAAAAATTCAAAAACCAAACCTCCAATTGCAGGAAAAAGTGCCTCT  
TCTTTGACAGTTAACGGCTCGATACCCGGACCTTTGGTACGTCTTAAGGAAGGTCAGACAGCAACGATTC  
AGGTTACAAATCAGTTAGAGGAAGATACATCAATTCCTGGCATGGCATTATTCTCCTCCCAATATGGA  
TGGAGTACCTGGTGTAAAGTTTTGCAGGGATTAACCAGGAGAACTTTTACCTATCAATCCCCGTCACC  
CAAAGTGGCACTTATTGGTATCACAGTCACAGTGAATGCAAGAACAACCTGGGGCATTTTGGTCCGATTA  
TTGTTGACCCAAATGAACCCGAACCTTTTGAGTATAACCGAGATTATGTCGTCATGCTTTCCGATTGGAC  
TTTTGAAAATCCCACCATATTCTTGCCAATCTCAAAAAAATGCCTGCTTACTACAATTATCAACGAAGA  
ACCATCGCTAATTTATCCGAAGATTGGGCATGGAAGGGGATGCGAATGGATCCTACCGATATCGCCGATG  
TACTGGAGCAACCTACACCTATTTAATGAACGGTTTGGCACCAGATTCCAACCTGGACTGGACTCTTTCA  
ACCTGGTAATAAAGTACGACTTCGCTTTATTAACGCTGCTGCAATGACTTTCTTCGATGTTTCGATTCT  
GGACTCAAATGACTGTCGTGCAAGCAGACGGTCAAATGTACAACCAGTAGCTGTCGATGAATCCGTA  
TTGGTGTTGCCGAACTTATGATGTGATTGTAGAGCCTCAACAAGAGCAAGCTTATACTATTTTTGCAGA  
AACGATGGATCGCAGTGGCTATGCTCGTGGCACATTAGCAATTCGTGAGGGACTAAGCGCGTCTCTACCC  
GAACGTCGCGAACGTCCATTGCGGAGTATGGCAGATATGGGAATGGATCACGGATCATCAGGTATGAATC  
ACGATATGTCAAGCATGAATGGTAGTTCTACTATGAATCACGATATGTCAAGCATGAATGGTAATTCCA  
CATGAATCACGATATGTCAAGCATGAATGGTAATTCCAACATGAATCACGATATGTCAAGCATGAATGGT  
AATTCCAACATGAATCACGATATGTCGAGCATGAATGGTAATTCCAACATGAACCACGATATGTCGAGCA  
TGAATGGTAGTTCTACTATGAATCCCGATATGTCAGGTAAGGATACAGGAGTTCCTCACGGTTCTGACGA  
TCATGGTTTAGGAAATGCAGCAGTGCCAATGATGGTAAAAAGTCGGTTAAATGAACCTGGTGTGGTTTA  
GAAAATACGGGAACCTCGCGTCTTAGTTTATACTGATTTGCGAAGTTTAAAGCCAGGTTCTGACCAAAGAA  
AACCAGAACGAGAACTAGAATTACATCTTACTGGCAACATGGAAAGGTATATGTGGTCATTTGATGGTAA  
GAAATATTCAGAAAACAAGAAATCACATTTTACAATGGAGAACGACTGCGCTTAATCTTTGTCAACGAC  
ACCATGATGGAACATCCAATTCATCTACACGGAATGTGGATGGAATTAGATAATGGCGCAGGAGAATATA  
AACCCCGCAAACATAACAATCAATGTCAAACCTGCTGAAAGGCTACCTGTAGAAGTTAACGTCGATGCGCC  
AGGTAAATGGGCATTTCACTGTCATTTGCTCTACCACATGGAGATCGGGATGTTTCGTACCGTAGCTGTT  
GTCGATCGCCCTCTGGAGGCAAGCTAG

>gi|427733619:2240379-2242235 Rivularia sp. PCC 7116 chromosome, complete genome96

GTGAATTATAAGACTAATGCACTTACCAGACGCAACTTTTTACGTTTCACAACCGGAATCGGCATAGCAG  
TAGGGCTAGATAGTCTTGTACCTGCATATGCCAGACAAGTAGTTGCGAATGAAACCGGAAAAGGACGTAA  
TTACCCCGATGTTATCGATCTAAAAGTTCAGGAAACAGCAGTTAAAATCGGAAACAAGCAAGCCAAAGCC  
CTAACAGTTAACGGCTCAGTTCCTGGTGCTTAATCCGTCTGCGTGAAGGACAAAACGTCACCATTAATG  
TAACCAATGAACTTAAAAAAGATACTTCAATCCACTGGCATGGTATCCTTCTTCGCCGAATATGGATGG  
TGTACCTGGAGTGAGTTTTGCAGGGATTAACCGGGACAAACCTTCACTTATCGGTTTCCTGTGGCTCAA  
AATGGCACGTA CTGGTATCACAGTCACAGCGGATTACAAGAACAACGGGGTCATTATGGTGCCTTATTA  
TTGACCCGATTGAACCCGAACCTTCGAGTATGACCAAGATTATGTCGTTATGCTCTCCGATTGGACGTT  
TGATAATCCCCACGATATTCTCGCCAATCTCAAAAAAATGCCCGCTTACTACAATTATCAGCGACGAACC  
ATCGCCGACTTGTCCAAAGATTTGGCATGGAGACGTATGCGGATGGACCCAGCAGATATCGCTGATGTTA  
CTGGGGCAACCTACACCTACTTAATGAATGGTTTAGTCCCAGACTCAAACCTGGACTGGACTTTTTCAAGC  
TGGAATAAAGTACGACTTCGTTTTATTAATGGTTCGGCAATGACTTTCTTTGATGTTTCGCATACCTGGA  
CTCAAATGACCGTAGTGCAAGCAGACGGTCAAATGTACAACCAGTAAGCGTCGATGAATTCCGTATTG  
GCGTTGCAGAACTTATGATGTGATTGTAGAACCTCAAGATGAGCAAGCCTACACGATTTTCGCAGAAAC  
AATGGATCGTAGTGGTTATGCTCGCGGCACATTAGCAGTTCATGAGGGACTTAGGGCACCCCTTCCCGAA  
CGTCGCGAACGTCCTTTACGTACTATGGCAGACATGGGGATGGCTCACGATATGTCAGGCATGAATGGTG  
ACTCCTCCATGAAAGATATGCCAGGAATGAATAATAATTCTTCCATGAACCACGATATGTCTGGTATGAA  
TAGTAATTCCTCCATGAAAGATATGCCAGGAATGAATGATAATTCTTCCATGAACCACGATATGTCAGGC  
ATGAATGGTGTGATTCTCCATGAAAGATATGCCCGGAATGAATCATGATATGTCCAAGAATGATGCAG  
GAGTTCACCGGTCCTGACGATCATGGTTTAGGAAATGCAACAGTACCAATGATGGTAAAAAGTCGGTT  
GCATGAACCTGGTGTGGTTTAGAAAATACAGGACATCGCGTTTTAGTTTATACCGATTTACGTAGTTTA  
AAACCCGGATATGACAAAAGAAAGCCAGAGCGAGAACTAGAACTACATCTTACCGGAATTATGGAACGAT  
ATATGTGGTCATTTGATGGTAAGAAATATTCCGAAGACAAGGAAATCACTTTTTATAATGGGGAACGACT  
GCGCCTAATTTTTGTGAATGACACAATGATGGAACATCCAATTCATCTACACGGAATGTGGATGGAATTA  
GATAATGGTGCAGGAGAATATAAGCCCCGAAACATACAATTAATGTCAAACCTGCTGAAAGACTACCTG  
TAGAGATTAATGTAGATGCCCCCGTAAATGGGCATTTTCATTGTCATTTACTTTATCACATGAAAGTAGG

GATGTTCCGTACAGTAGCTGTTGTTAATCGGGGGTAA

>gi|113473942:551971-553365 *Trichodesmium erythraeum* IMS101 chromosome, complete genome97

ATGGCAACTTTAATCACTCAATGTAATATAAATAATACTCAAAAAATCAACAACTTATATCATCATACC  
CTCAAATACATCAGAGCCAAGATGGAATTCTAGAAATTGATTTGACAGCTAATATTAGTCAAATAAATCT  
GGGAAATAAACAAGCTTATGTATTAATTATAACGGACAAATTCCCGGACCAAGATTAGAAGTAAAACCA  
AGAGATAACAATTAGGATTAATTTCACTAACAATTTACCCCAACCTACAAATATTCATTATCACGGACTAC  
ATATTCCCATGACTGGAAATGCTGATAACGTATTTCTGAATATTTCTCCAGGCGATCGCTTGACATATCA  
GTTTCAAATTCCTGAAAATCACCATGCTGGAATGTTTTGGTATCATCCACATCTCCATGGTTTAGTAGCA  
GAACAAATTTTTGGGGGGTTAGCTGGATTATTTATTGTCCGTGGAGAGCTCGATGAAATTCCTGAAGTAA  
AAGCTGCTTCAGAACAATTTTTAGTGTTGCAGGATTTGCCCTAGACCAAAAAGGAAATATACTCCCATC  
TCATGAGCTTTCAATAATGACAGGAAGGCAAGGAAATTTGATCACTGCTAACGGTCAGTCTAACCTAAA  
TTAACCATTCCCCCTCAAATTTATTAAGAATTCGTATTCTTAATGCTTCAAGTTCCAGATTTTATCGGT  
TATCTTTAGAAGAACACCCATTTTATTTAATAGCTACTGATGGAGGAGCATTAGCTGAACCTGTAGAAAT  
GTCAGAACTATTATTGACTCCTGGAGAACGTGCAGATGTATTAGTCCAAGGTAACCGAGAGCCAGGAAAA  
TATCGCTTGTTGAATTTACCTTATGAACGAGTGGGTATTGGTATGATGGGGAGAAATGTATCTGAAAGTC  
AACCACAAGTTTTAGCAACAGTGAGTTATGACCAACAGTCCACTGCTGTGCCACTGCCAACCAAACCTCAT  
CCCTGTCCCAGCATTGCCCGAACCTCAAAAAGTACGTCGTTTTTCAGATGAACCATGGCATGATACCTGGT  
CAAGGGATGGCATTTTTTGTTAATGGTCAGCCATATCAACCAGAAAGAATTGATACTCAAGTTCAGCTCA  
ATACCGTTGAAGACTGGGAATTAATTAACACAGGCATAATGGATCATCCCTTTCATATTCATAGCAATGC  
TTTTCAAGTTTTGAGTCGGAATGGCAAACCAGAACCCTATCGTGCCTGGAAAGATGTAGTCTTAGTCAGA  
CAGGGAGAAACAGTTTTAATTCGGATGCCATTACAAGATTTTGCTGGAAAACTGTTTATCATTGTCATA  
TTCTTGACCACGAAGATTTAGGAATGATAGGAAATTTGGAAATTAAGCAAGACTTTCTATTTAA

>gi|347534971:1017667-1019919 *Flavobacterium branchiophilum* FL-15, complete genome98

ATGAAAAATGAAAAATAAAAAACATATCAATATTGCCTACGGCAATATTGATATTGTTTATTTCTCAAT  
CCATTTTCGCACAAAAAGTAGTGAGATATGATTTATATGTACGTGATACAATAGTAACTTTTGGCGACAA  
ACCAAAACACGCCATTGCGGTAAACGGACAAATCCCAATGCCAACACTAACATTTACCGATGGCGACATT  
GCGGAAATTTATGTACATAATGAATTAACGAAGAAACATCTTTGCATTGGCACGGATTATTTTTACCAA

ACAAAGAAGATGGCGTTCCTAATTTGACACAAATGCCAATAAAACCCAAAACGACACACAAATATTCTTT  
TCCAATTATTCAACACGGCACACATTGGTATCACAGTCATTCGGGACTGCAAGAACAAATCGGAATGTAC  
GGAAATTTTGTAAATGCTCAAAAAACCAACCGACCCAACCTTTCAGAAAAGGAATTGACGATTTGCCAAGCA  
TTCCAATAGTTTTAAGCGAATGGACAGATGCAAATCCTGATAATGTACACAGAATGTTGCACAACGCAAC  
CGATTGGTTCGCTATTCAAAAAGGCACAACACAAAGTTATGCAGAAGCAATCCAACAAGGTCATTTCAA  
ACCAAAGTAACCAACGAATGGAAACGAATGAACGCAATGGACGTGAGCGATGTTTATTACAATAAATTCT  
TAATAAACGGAAAAACGAAAGCCAACCTTTCGCAATTCAAAGGTGGCGACAAAGTGCGATTACGCATTTT  
AAACGGTGGAGCATCAACCTACTTTTGGCTCAACTATGCAGGCGGAAAAATTACCGTTGTTGCCAACGAT  
GGTAACGATGTAGAACCTGTGAAGTCGATAGACTAATCGTTGCAGTTTCTGAAACCTACGATATTATTG  
TAACCATTCCAGCCGACAAAACCGCTTACGAATTTTTGGTAACTTCCGAAGACCGCACAAAATCCGCATC  
CTTATATTTGGGCGATGGCATCAAACAACCTACTTCTACCCTACCAAATTTAAAATATTTTGAGGGTATG  
AAAATGATGAATGATATGATGAAAATGAATGGAGATTTAGACGATATGGGAATGAGTATGTCATACAATC  
AAATGGATATGAACGTAGTAATGTATCCCGAAATTACAGGCGAAGCAAAAACCCAAAAGCGACAAAATGGG  
CGATATGAAAATGACCGAAGACGATTATAATAGCAATAAACTTTCAGACATTGTAACACTAAATTACGCA  
ATGTTAAAATCACCTTCCAAAACAACACTCCCAAAAGACGCACCAATCAGAGAATTTAAAATTTGAACTTA  
CAGGAAATATGAACCGCTACGTTTGGAGTTTGTAGACAACAAAGTAGTTTCTGAAACTGATAAAATTTAAT  
CAAAAAGGGCGAAAATGTACGCATCACAATATATAACGGCTCAATGATGCGACACCCAATGCACTTACAC  
GGACACGATTTTAGAATTATAAACGGTCAAGGCGACTACGCTCCACTCAAAAACATCATTGATATTATGC  
CAATGGAAACTGATATTTTAGAATTC AACGCCAATGTAGAGGGCGATTGGTTTTTTTCATTGTCATATTCT  
CTACCATATGATGGCAGGAATGGGCAGAGTTTTTACTTACGAAAACCAAGCACCTAATCCATTAATTTCA  
AATCCAAAACCTCGCACAGCGCAAACCTTTTTGCCGACGACAGAGCATTTTCAATTTATGGCAGAAAATGATT  
TTGCTACTAATGGTAATGATGGTAGCGCAATGTATCAAATAACACGTTGGAGTATTGGTACGGAATGGAG  
ATTAGGTTACAATGATATGCACGGTTACGAAATCGAAACACACATAGGTAGATATATTGGTAAGATGCAA  
TGGCTAATGCCTTTTATTGGATTTGATTGGAGATACAGAAAATGGAAGATAACGAGATGGAAAAAACC  
TTTTCAATCAAACAATAACCAAAGACAAACGTTCTGTTTTTAGTCTTGGATTAGAATACACCTTGCCAAT  
GCTAATAAAGGCACAAGCCGAAGTGTACTGATGGAAATGTACGTTTACAATTCGAACGAATGGACATT  
CCAGTAACCAAGCGATTACGAATGAACTTAATGTGGAATACTGATAAAGAATATATGGCAGGATTACGAT

ATATAGTAAAACGAAATTTTGGTATAACCACACATTACGACAGCGATATGGGAATAGGCTTTGGAGCAAG  
TCTAAATTATTA

>gi|410109000:c120156-117277 Fibrisoma limi BUZ 3 plasmid pFLIM01, complete sequence99

ATGAAACATTTCAATATTCTTTTCGGTCGTCGTTTCTACGCTCCTGCTGTCAACGGCATAACGCCAGCATC  
AGCAACACACCCCGGCTGCAACTGACCAGGCTACTGATAAACCGTATGACCCCGATAAGTCGAACTTTTC  
CGCGGTCAGAACAACCTTACCTGTTTCCCGGCCGACGGCGTCGGCGAAGGTAAAATTAACCGGTAAACGG  
ATAACCTACGACCTGGTCATTGACGAACAAACGGTTAACATTACCGGCAAGCCAACCAAGGCGATGACCA  
TCAATGGCGGCATTCCAGGCCCAACCATGCGGTTTACCGAAGGGGATGTAGCCGTAATACGCGTTCACAA  
TAAATTAAGACAGAAACCTCGTTGCACTGGCACGGTCTACTGCTTCCAATAAACAGGATGGGGTTTCT  
TACTTAAATACGCCCCCATTTCATGCCGGTGATACCTACACATTTCGAGTACCCGCTGGTGCAGTCAGGTA  
CGTATTGGTTCCACTCGCATAACCCGCTATCAGGAACAGGTTGGCGTATACGGATCAATCGTTATTCAGCC  
TCAGCGAATCACCCATAAAGTCGACCATGATCTGGTGCTGTTGCTGTCGGACTGGACCAATGAAAACCCG  
GCTTACATTTTGAAAAACCTAAAACGGCGCAACGAGTGGTATTCCATTAAAAAAGGTAACGTCCAGTCAC  
TTAACCGCATCATCCGGCACAAAGCCGTAGGGGCTTATCTACGCCAGTCCATGATGAAAATGGCCCCGAT  
GGATATTTTCGGACGTCTACTACGAACGGTTTCTGATCAACGGTAAAGACACCACTCGTCACCCGGAGATC  
AAGCCTGGCCAGACCGTTTCGACTGCGGGTCATCAATGCCTCCGCTTCGACCTATTTTCATGTGAACTTTG  
CGGGCGGTTCCCTCAAATTGATTGCAGCCGACGGGTTGGACGTTACGCTGTGGACGTTGACCGTCGGCT  
GATTGCCATTGCCGAAACGTATGATTTTCTACTTACGGTGCCCCAAGGGGGTGCCTTCGAGATACGGGCA  
ACGGCTCAGGATGGTTCCGGTTATGCATCGGCCCTGCTGGGTAGTGGCCTGGTTCACTACGCCCCGACCA  
TACCCCGCCCTGATCTCTACAAGCTGACGGCGAACATGAGCCGTATGGGAGGCATGGGTATGGGTTCTAT  
GCGTATGGGACGTGCCGACACAACGGCCAGGCAAACGTAGAGATGAACGGCCCGATGATGCACAATATG  
ACCGGAATGAATCATGTACCCAGCCAACACCCTACGGATGCCCCAAAACCGACCCCGAAAGCAGCAGACA  
TGGGCGCCATGGACCATAGTCAGATGCAGATGGAGCCATCCAAGCCAACCGGGACTAAACCCAGAAACA  
GGCGTCAATGGCTGGAATGGACCATAGCCGGATGGATATGGGCGGAAAGCCGGCAGCGAAGAAGCCGACT  
GCGGCCAAAAACACTACTAAGTCATCAAATCGGCCGGATCAATGGCGGGCATGGATCATAGTGGTATGA  
ACATGGGCGACATGAATCCAGCCAAAGATGGTAAAATGGACATGACAGGAATGGACCACGGGCAAATGGA  
TCATTCACCCATGCCCGGCATGGATCATAGTAAAATGGCCATTAGTGCGGATTCGATGCCTGCCACGCAA

ACGGACGGTAAAAAGCCGGATCATATGGTAGGCATGGACCACAGCCAGATGAACAGGACCGAACCCGCAT  
CAGCGGGCCGGTCAATCGCAGACAGTCCGGGGGTATGGCCGGAATGAAGGGCATGAACCACGGGGATAT  
GGCCGATGCGTCGGCGGACGGGGCGGACCACGGCATGAGCATGATGGACGAACAAAACACCATTGACTAC  
AGCATTCTCAAGTCTCCCGAGCCGATTGTTTTCCGGCTAATCACCCATCCGTGAAATTCCGCTCACCC  
TAACGGGCAACATGTTTCGCTACATCTGGGGCTTCAACGGACAGCCCCTGTCGCGGGCTGACATGATTCA  
GATTCGGCGCGGTGAAATCGTGCGTATTCGCATGATGAACAACACGATGATGATGCACCCCATTCACCTG  
CACGGCCATTACTTTCCGGTGCTCAACGGGAAGGGACAGTACTCACCCCTGAAGCATAACGGTTAACGTAT  
CGCCCATGGAAAGCGTCACCATTGAGTTCATGGCCGACGATGAAAAGGACTGGTTCCTTCACTGCCACCT  
GCTGTACCACATGCTCAGCGGCATGGCTCGTGTGGTCAGCTATAGCGACCAACCCGACTCATCCATCGCC  
CAGATTCAGAAGCTGCACCTGCGTGACATGCGCGATAACCAGCCCTTCGTATGGGGCTACCTACAACCGG  
GTTACCCCTCAACTATTTTGCCTTAAACGTCTCCAATAACAAAACGCGATTGTCGCTGGCGGTGATCA  
CGACTGGCGAACCAATCGGTTTCGAGTTCGATCTGGATTACGAACGATACTTCGGCGACTGGTTCGGGTA  
TTTGCCGGTATTGACGGCGTAATGAAGAGTTTCTACGTGTGGTACGTCCTGAGGAGGGGGGGCAGCCCA  
TTGGCAGTCGGCGCATTGTTAGGGCTGTAGCTGGTGTCCGATATATGTTGCCGTTCTAATTCAATCGGA  
GGTTAAAGTAGATACACGGGGCAACGTCCGGTTTCAACTGAGTGGTCAGCAAAGTCTGTTTCCCAGGCTT  
GACTTCCAATATCAGGCACAGTGGCTGGTCAATAGTTATCTGCGAGCACACGTGGAACCTGCAATACACCC  
TTACCAAGAATCTGTTTCTTACACCGACTATGACACGCGTTACAAGACCTTCGGAGGTGGATTAGGATA  
CAATTTCTAG

>gi|443241923:766433-768817 Nonlabens dokdonensis DSW-6, complete genome100

ATGAAAAAACTACTAATATTTTTCTTAATACTATTTGGATTTGCAATGCAAGCACAAAACAGACAATC  
CTTTTGTGGCCAACAAATCCGAAGAAAATGTTGATAATTGGCCAGAACGTGTCTATGATTTAACTATTGA  
TTATGAGACTGTAACTACACGGGTAAAGATGTAAAAGCGATGACCTTAAATGGTAGTATTCTGGTCCA  
ACTTTAGAATTTAATGAAGGGGAATTTGCTATTATTAACGTAACCAATAAAATGGATGTAGAAACATCTG  
TGCACTGGCACGGTTAATACTTCCACATTTTTACGATGGTGTACCTTATCTAAATACACCACCTATTAA  
GCCAGGCGAAACTCAACAGTACAAATTTGCGCTCAAACAATCTGGAACCTATTGGTATCACTCACATACG  
GGATTGCAAGAGCAACGTGGTGTATGGCTCAATTCAAATCAATCCTAAAGAGACCACATTAGAGTATG  
ATAAAGATTTGGTACTCGTACTTTCCGACTGGATGGATGAAAATCCTAAAACACAACCTCCGTAACCTAAA

ACGAGGTAATGAATGGTACCTCATTAAGAAAAATCAAGTACAAAGTTGGGATAAAGTAATCGCCAGAGGT  
GCTGTTGGAGCTAAGTTGAAAATGATGTGGCAACGTATGCCAGATATGGCTATACTTGACAATTACTIONG  
ATTATTTTTTTATAAATGGAAAACCTGAACAGAACTATACTGATTTTAAACCTGGTGAAAAGGTAAGGGT  
ACGTTTTGTAAATGCAGCTGCTGCCACTTATTTCTGGCTTACATTCGGTGGCGAAGACCCTACGCTAGTA  
GCAGCGGATGGGTTAGATGTTGTTCTGTACCACACAATAAAACATTAATCGGAGTTGCCGAAACATATG  
ACTTTATAGTAACTATTCCAGAAAGCGGAAAGCTGGAAATCCTTGCAACTTCACAAGACGGTTCTGGTAA  
AGCATCTACCTTTTTAGGAACAGGCAATACATTGAAAGCTCCAGAAGTTCCTAGACCTGATTTGATTA  
CAGATGCAAGAGATGATGTCAATGGATATGAAAATGGGAGCCCCAGCAGTTAAGTTCAACCCTTCAAAA  
ATGATAGTATTGAAAAATGAAGAAATACGCAATGAAGATGGATGGAATGCAAATGGATGGAATGAATAT  
GAAAGATGACAAAATGCAGATGGATGGGATGCAGAAAGATAAAGATTCCATCAAAATGAAAGACAACGGT  
ATGGCTCATCAGGATATGAAAATGAAGGAAGATAAGATGCAAATGGATGGTGGAAATGAAAATGGGCTATA  
TGGTTCCAAAAGACAAAAGTGATAGGTGATAATATGAAAACAGGTGGTAATCCTGAATTTAATTATCACTA  
TTTAAAAGCGCCAGAAAGTACCGAATTTGACGAAGACAGACCTACACGTGAGATGCTATTTAACCTAACT  
GGTAATATGAACCGATATGTATGGTCAATAAACGGAGTACCCTTTCAGAAACCGATAAAATAAAAAATCA  
ATCAGGGAGAAGTTGTACGAATAACGCTTAACAATATGACAATGATGCACCACCCAATGCATCTACACGG  
ACACTTTTTTAGGGTACTTAATGAAAATGGTGAAGCGCAGTCCATTAACACACACGGTTAATGTTGCACCG  
ATGCAAAAGGTAGTCATTGAGTTTGCTGCGGATGAAAAGGGTGATTGGTATTTTCATTGTCACGTTCTAT  
ATCATGTAAACAGTGGTATGGCTAGAATTTTTAGCTACGATACACCACGAGATGAACGATTAGAAGGATA  
TCCTTTGACCAATCTTACCAATGAGGCAAATCATATGTTCACTTGGGGAGAAGTCACTGGGGCAAGCCAT  
ATGACAGAATTATATTATACGGCAACGAACATTCGTAATCAGTTTACCTTAAGAGGAGAATATGGCTGGA  
ATGAAAATTTAGAAGCAGAGTTTACATACGAGCGTTGGCTCAATAGTTATTTTCAGGGTTTTTGGAGGCGT  
AAATGTTGAAAACGAAGGCGTGGATAGCCTTGAAGAAATATCTACCACAGGTGTCGTAGGTGTTGTTAT  
TTGCTTCCACTTCTAATCGATTCCGATTTACGGATTGATAACAAGTTACGTCCTACTATCTCTTTTGCGA  
CAGCGACTATGATATTTAGAAATGTTGCTCTTTATGGTGAGTATGAATACCAAATGGATTTTGGTTGGGT  
AAATGATTTTGAAGAAGGGACTGATTTTGAAGAAGAAACGACTTGGCAAGTAGGCCTTGAATATGTACTG  
AGTAGAGATTTCTCTTAATGGGAAGCTATGACAACCGTTTTGGATGGGGTGGCGGACTTTCATTAAGAT  
TTTAA

>gi|374290092:c400946-398721 Blattabacterium sp. (Cryptocercus punctulatus) str. Cpu  
chromosome, complete genome101

ATGAAACAAAATGAAAATTTAAATTTCTTGATGATGAAAAAATTGCCGAAAAAATAATTGATTTTAAAG  
ATAAAAATATCACTTCCGTTTCGTTTTTTATTCCATCTATTCATTGCAGTTCATGTATCATGATTTTGGAA  
AAATTTATCTAATATTCATAAAAATATAATTGAATCCACTGTTGATTTTCCAAGTAAAATAATTAGAATA  
ATATTCATCATTCTGGATTAATAAAGCTATTTAGCAATTATTCTTGAAAAAACAGGTTATAAACCTT  
CTATTAATTTTGAATTTTGTAGAAAAAAAATAAGAAAAAATATTTGATAGAAAATTAATAGGAAAATT  
AGCTATTTCTTTTTTTGTTTTGGAAACATTATGCTTTTATCTATTCCAGAATATGTAGGATCTCATGAA  
GATATATGGTATTTAGAAAATCGTAATTTCTTCGTTATTTAATGTTAATTCTTCGTTACCTATTGTAT  
TATTTTCTTTCACAGATCATATAAAATATGCTATTTTAGGATTTAAAAACATATTATTAATATGGATAT  
TCCTATTTCTATTGGAATATTAGTTCTTTTTTCATGGAGTTGTTATGAAGTATTTTTTGATTTAGGATCT  
GGATATTTTGATAGTTTATCTGGATTTTCCTTTTTTTACTTATTAGTAAAATATTCCAAATTCATACTC  
ATAATAAAATATTTTCTTTTGAAAAAGTTATAAATCCTTTTATCCTATTTCAATATCAAAAATTA AAAA  
AAATAATCAAGAAGAAAATATTTTACTTTTTTCTTAAAAAAGGAGATCATATTATAATTAGAAATGAA  
GAAGTTATTCCTGTAGATTCTATATTAATAAAAAGGATCTGCATTATTAGATAATAGTTTTCTTACAGGAG  
AATCTTATTTAATAAGAAAAAAAATAGGAGAACGAATTTATGCTGGATCTAAACAAAAGGGGGAAGCTAT  
TTATTTAAAAGTAATCAAAAATGTAGATCAAAGCTATCTAAGTTTATTATGGAATAATAAAAAATTTTCGT  
AAAAATAAAAAAATTTTCATTTAAATTCAATAACTAATCAATTTAGTCAATATTTTACTCCTATTGTTT  
TAATCATTTCTATAATAACTGGAATATATTGGTATTTTATTAATGTATCAAAAATTTTCAAACCTGTTTT  
TTCCGTATTAATTACTTGTCTTGTGCAGTAGTACTTGCCACTCCATTTATACTTGGAATTTTCATA  
CGAATATTTTCTAAAAAAGGATTTTATGTAAAAGATATTTCAACTATGGAACGAATTTCCAATATAAGTA  
CTTTAATTTTTGATAAACAGGAACTATTACAGATCAAATAAAGAAAAAATTTCTTTTATTGGTCCATA  
TCTTAAATGTAAAGAAAAAAAATGATTTCTCTTTATTAAGAAATTCATTCATCCATTAAGTAAAAAA  
ATTTTTTCAGAATTATCTATCAATCAATTTTATCCTATAAAAAATTTTCGAGAAATAATAGGTTATGGTA  
TAGAAGGAATTATAAATAAAGTTCCAGTTAAAATTGGATCTTCTAAATATATAGGTATTACAATAAATAA  
TTCTAAAGGAACTTCAGTTGCTATTTCTATAAATAAAAAATTCATAGGTTATTTTTTATTAGAAATTAT  
TATAGAAAAGGAATAGAACAAATATTCCAAAATCTAAAAAAAATATAAATAATTATTCTTTCTGGTG  
ATAATAATAAATTAGAAAAAGAATATTTAGAATCAATTTTACCAAATCTAGTAAAATTATTTTAATCA



AAGTCCAGAAAAAACTAGATTATGTAAAAAAATACAAAAAATGGAGAAAAAGTAATGATGATTGGA  
GATGGTATTAATGATTCTTCTGCATTAATCAAAGTGAAGTCGGCATTTCATATCAGAACTCCAAGTA  
GTTTTTTCCTAATTGTGATGCTTTTATTCAATCTAATTATTTGAATAAAATTTTTTATTCTAAAAAT  
ATCCAGGATATCAATCAAATTGATTATTGTAAATTTTATGATTAGTTTATTTTACAATTGTATAGGAATT  
ATATTTGCTATAACCGGTTTTTAACTCCTTTTATTGCAGCAATTTAATGCCTTTAAGTTCTTTATCCG  
TAATTATTTTTTCTCTATTATCTACTTGGATAGTTTCACGAAGATTTTTATCTTAG

>gi|294505815:c2045657-2043036 Salinibacter ruber M8 chromosome, complete genome102

ATGAGTCGCCCTTCTCCCGAGACTGAGACGTCGCCACCAGACGCTCCCTCCCACGCCCCGTCCGCCGAGG  
GGGACGCCTGTGCGGTGCGAGCCGGTCCCTCCGAACGTCGGGAGGGCCATTCTCCGGGGAGCGAGGAGA  
GCGCCTGACGCTGCCATAAAGGGCATGTCGTGCGCCTCCTGCGCGAAGAGCGTGGAGGGGGGGCTCGCG  
GGTGTGATGGGGTGCGGAGGCCCGTGTCAACTTTGCAACCGAGCGGGCCAGGTGGGGCTCCAGAAGG  
GAAGACGGGTGCCGGTCCGGAACTGGCGCAGGCCGTGCGCCACAGCGGCTACGAGGTGCGCACCGCCGA  
AACGGCCCTCACGGTGCAGGGGATGACCTGCGCCTCGTGCCTCTCCCGCGTCGAAGACGCCTTGGGCGCG  
GTGGAGGGGGTGCTGGAGGCGACTGTGAATCTCGCCACCGACCGGCCACGGTGCCTACGTGCCGGGTG  
CAACCGAGCGCACGGACCTCACGCGGGCCATTCGCGACGCCGGCTACGAGGGGGGGCGGGACGGAAGACGG  
GGGCGACCGTGCCGACGTGGAGAACCAGGCCCGAGAAGACGAGCAGCGGCCGATGAGGCAGCGGTTCTC  
TGGGCGCTGGCCTTCGCGCTTCCGGTATTCGTGTTGGAGATGGGCTTCATGCACATCCCGGCAATGGAGG  
CCTGGATCACCGATCAGGTGTCCACCCAGACGCTGTACTACGTGCTGTTTGCCTGACGTCCGGTGGTGCA  
GTTTGGGCCGGGGCGCTACTTTTACAAGCACGGCTGGCCTGCGCTCAAGAGCGGCGCCCCGACATGAAC  
ACGCTCGTGATGATGGGCACCTCGGCGGCGTACGGCTACTCGGTGGTGGCGACCTTCTCCCGACCGTGC  
TGCCGGAGGGAACCGTGCACGTCTACTACGAGGCCGCCGCGACGATCATCACCTCATCTGGCGGGCAA  
CTACATGGAGGCGCTCGCCAAGGGCCGCGCCAGCGACGCGATCCGGGCGCTGCTCGACCTGCAGGCCACC  
ACGGCCCGCTTCGTGCGACGGCGAGGAGGAAGAGATCGACGTGCGCGACGTGGTGGCGGGCGATGTGG  
TTCGGGTGCGGCCCGGCGAGAAGGTGCCGGTGCAGGCGAGGTGCTCGACGGCCAATCCCACGTCGACGA  
GTCGATGGTGACCGGCGAGCCGGAGCCGGTGCGCAAGGCCGAGGGCGACGAGGTCGTGGGGGGTACGATC  
AACGAGACCGGCAGCTTCACTTACCGCGCCACGCGGGTGGGGGAGGAGACGGTGTCTCCCAGATCGTAG  
AGATGGTGGAGCAGGCGCAGGGATCGGCCCGCCATTTCAGTCGCTCGCCGACCGGGTGGTCCGGGTGTT

CGTCCC GTTCGTCTGGCGACGGCCGCCCTCACCTTCGGCGTCTGGATGGTGTGGGGGCCGGACCCGGTG  
CTCACATACGCCCTGGTCTCCGCCGTATCCGTCTCATCATTGCGTGTCCCTGCGCGATGGGCATCGCCA  
CGCCGATTTCCGTGATGGTGGGGACGGGGCGCGGCGGAGCTGGGCGTGTACGTCCGGGAGGGCGACGC  
GCTGCAGGCCCTCCACGCGGCGGACCTCGTGGCGCTCGACAAAACCGGCACGCTCACGAAGGGCCGGCCC  
GAGGTGACGGACGTGCGCCC GAGATGGATTCCGGGAGACGGACGTGCTCCGCTGGGCGGCCCGCTAG  
AGGCCCAGTCCGAGCACCCGATTGGGGCGGCGCTGGCGGCCGGCCGAGGAGAGGGGGCTCGCCCTGCC  
GGACGCGACGGACTTTGAAGCGATCCCCGGACACGGCGTGC GGCCACCGTGGAGGCGCGGATGTCGCG  
GTGGGGGCCGCCCGCCTCATGGAACGGCACGACGTTGCGATTCCCGCCGGGGCCGAAGAGACGGCCGACC  
GCCTGGCCGACGCCCAAGACGCCCTGTACGTGGCGGTGGACGGGACGCTGGCCGCCGTGGTGGCGGT  
GGCCGATCCCATTAAGGAGTCGACGCCCGCGGCGCTCGACGCCCTGCACACCCTGGGCATTGAGGTTGCC  
ATGGTTACGGGCGACGACGAGCGCACCCGGGCCATTGCCGACCAGCTCGGCATCGACCGCGTGCAGG  
CCGAGGTGCTGCCCCGACGAGAAGGCCGCGGCGGTGGACGACTTTCAGGCAGGGGGACGGACGGTTCGCGTT  
CGTGGGCGACGGCATCAACGACGCGCCCCGCCCTGGCCAGGCCGATGTCGGCATTGCCATCGGCACCCGGC  
ACCGACGTGGCCATCGAGAGCGGCGACATCGTCTAATGGCCGGGGACCTGCGCGGGCTCCCCAACGCGG  
TGACCTGTGCGGTTCCACCCTCCGCAACATCAAGCAGAATCTGTTCTGGGCCTTCGCGTACAACGTGCT  
CCTGATTCCCGTGGCGGCGGGCGTGCTCTACCCGGCGTTCGGCCTGCTGCTGTCGCCCCGCCCTGGCGGCC  
CTCGCCATGGTGTCTCCGACCTCTTCGTCGTGGGGAATGCGCTGCGGCTGCGGGCGCCTAAGTGTGCCGC  
TTGGAGGCGAGCAGGCCGTGGCGACGGCCTAG

>gi|110636427:c:1729671-1727257 *Cytophaga hutchinsonii* ATCC 33406 chromosome, complete genome103

ATGGAAACGAAAGACATATTTGAAATACCTTTATCAGGTGTACATAGTGAGCATTGTGCTCTTTTAGTAG  
ACAAGACATTTGCTCAGAATACCGACATTTCTACTCATAAGGTAGACTTCAATAATGAACGTGCTTTACT  
TAATTTTAAATCATTAACTCCTGATTTTACGAAGGTGGTTAAAGATATCCGCAGTATCGGATATGATGTA  
TTAACTGTTAAAAAATCATTTCCGGTCTTGGAAATGTCTTGTGCATCCTGTGCAAGCAGTTCACAGAGTA  
TTCTTGAAACACAACCTGGTGTGATAAGTGTGCTGTAAATTATGCAAACACAACAGCGCAGATAGAATA  
TATTCCAACGATTACAAATCCAAAAAACTTAAAGCTTCAATACAATCTATCGGTTACGACTTGATGGTT  
GATGAAAGCGAAGAAGCAAAGACACGCTAGAGGAAATTCATAAAAAAATTATACGATTCTTAGGAATA  
AAACAATTGCAGCAATCGTACTCTCATTACCTATCGTTGTAATAGGGATGTTTTTTATGGACATACCATA

TGCAAATTATATTATGTGGGCATTGTCTACACCTGTGATTGGCTATATAGGGAGTTCTTTTTTATCAAT  
GCCTGGAAACAAGCCAAACATAGGTCTGCTAATATGGATACACTGGTTGCATTAAGCACAGGTGTAGCAT  
ATTTCTTTAGTGTATTTAACACTTTGTTTCCTGAATACTGGCATCAGAAAGGCCTTCATGCACATGTATA  
TTTTGAAGCGGCTTCGGTAGTTATTGCTTTTATTTTACTCGGAAAATTATTAGAAGAAAAGGCTAAAGGA  
AATACATCTTCTGCAATTAATAAATAATTGGTTTGCAGCCTAAAACGGTTACGGTCGTTTCATCAAGGTG  
GTCATCAGGTTGAAACGCCGATAGCTAATGTAAAGATTGGTGATGTACTATTAGTGAAGCCGGGAGAAAA  
GATTGCTGTAGACGGCAAACCTTGTATGGCAACTCTTTTGTGGATGAAAGTATGATAAGTGGCGAACCT  
ATCCCTATTGAAAAAATATAAATGATTCTGTGCTTGCAGGCACGATAAATCAAAGGGAAGTTTTCAAT  
TCGTTGCAGAAAAAGTCGGTGGAGATACGATGCTGGCACACATAATTAATAAATGGTGCAAGATGCACAAGG  
TAGTAAAGCTCCGGTTCAAAAACCTTGTGATAAATCGCAGGTGTATTTGTACCGATAGTTATTGTAATA  
GCAATCTTAAGTTTAATAGTGTGGGTGTTGTTTGGAGGCGAAAACGGTTTCACGCAAGGTATGCTGGCAA  
TGGTTACTGTTCTTGAATAGCGTGCCCTTGTGCGTTAGGATTGGCCACTCCTACGGCAATAATGGTTGG  
TGTCCGGAAAGGTGCTGAAGCTGGCATCTTGATAAAAGATGCTGAAAGTCTTGAGACTGCAAGGAAGATA  
AATGCAATTATCCTCGATAAAACAGGAACGATTACAGAAGGCAAGCCTGCTGTGACGGATGTTATTTGGT  
TGAATGAAAACGCAGACAAAATTAACGTTTTTCGCATCCATTGAAAAACAATCCGAACATCCCCTTGCGGA  
AGCTGTTGTTAACTATTTTGGAGAAATGAGTTACCTAAAAGTTGATAATTTTGAAGCATTACCGTTCT  
GGAGCAAAAGCGGTTGTAGATAATACATCGTATTTTCATAGGTAATATGAAATTGATTGATGCACAAAAAA  
TCAACATACATACAAATCTTAGAAATAAATCTAATCTATGGCTTAAAGAAGCTAAGACTGTCATTTACTT  
TGCTAATACCACAGAAGTTTTAGCAGTATTAGCTATTTCCGATAAAATCAAACACTACTTCCATAGATGCA  
ATTAACAACACTCAAACGTTGGGCATAGAAGTATATATGCTTACAGGCGACAATACCTTTACTGCTGAAG  
CTATAGCCAAGCAAGTCGGTATAAGTCAATTTAAAGCAGAAGTGTTACCATCTGATAAAGCGAATTTTGT  
TAAGGAGCTGCAGGCACAAGGTAAAGTTGTTGCAATGGTAGGTGACGGAATCAACGACAGTAATGCATTG  
GCACAGGCTAATGTTAGTATAGCCATGGGCAAAGGAAGTGATATTGCAATGGATGTTGCAAAAATGACTA  
TCATTTTCATCTGACCTTTCTAAAATACCTCAAGCAATAAACTATCTACCTATACGGTTAATGCCATCCG  
ACAAAATTTATTCTGGGCATTTATCTATAACATAATCGGTATCCCTTTGGCAGCTGGTATCCTCTACCT  
TTTACAGGTTTTTTATTAACCCAATGATTGCCGGAGCAGCTATGGCACTGAGCTCTGTAAGTGTGTTA  
GTAACAGTTTGAGATTAATAAATTAATCCATTTAA

>gi|379728134:2860809-2863028 Saprospira grandis str. Lewin chromosome, complete genome104

ATGTCTAAATATATAACAACCTTCTTACCTCATAGAGGGCATGTCCTGCGGGCCTGTGCCCAAAGTG CAG  
AAAAAATTCTCTCCCGCCAAAAACAACCTCAGCCGAGTATCGGTCAATTATGCCAGCAAAAAGGTCCAAT  
TACCGCAGAGCAATCGCCAGATTTAGAGCAGCTCAATGCCGCCCTCAAAAAAGCAGGTTTTTCAGTTGCTG  
CCCCCGCTCCCGATCAAAGAGCAGTAGCCCGAGAACGGGCCAAAAAGAAGCAACAACAAAGTTTTCCGCC  
AGTTATTTTTGGCCAGCTTGTTTGCCTTCTCTTTTTGTCGTCTCTATGCTGATGCCGCCTTTTGCAGG  
CGATAATTACCTCATGCTATTTTGGGCCTCTATGATTTTGTGGCCCCGGACGACAGTTTTTTGTCAAG  
GCTTGGCAACAACCTGAAAGTAGGCCAATCTAATATGGATACTTTGGTGGCTCTAGGCACAGGAACGGCTT  
ATGTATATAGTCTGGTCGCTACTTTTTTGCCTAATTGGTGGAGCAGCCAAGGCCTTAGCCCTCATGTTTA  
TTTTGAAACAGCTGGCCTGCTGCAAACCTTTATCCTTTTGGGCCGATACTTAGAGGGCCGAGCCAAGGCC  
AAAGCCTCTAAAGCCTTAGATGCCCTCTAGATTTACAACCCCTACGGTCCAATTTGGCAGCATGAAA  
TCTGGACCGAAATGCCCTTGGCCGAGCTCAAGCAGGGGACCGCCTGCTCATCCGTCCAGGCGAACAAT  
TCCCCTAGATGCGACTATCCTCGAAGGTGAATCAGAGGTGGATGAACAGCTGTTGACTGGAGAATCTCTG  
CCCCAACACAAACTAGTCGGTGCCTTATTTGGGCAGGCACGCTCAACCAAACGGGCCGTTTGTCTGGTAG  
AGGCCAAAAAGGAGCCGACCAAAGCCGTTTGGCCCAAATTATTGAGCTGGTCGAAACTGCCCAAAGCTC  
TAAGGCCCCCATTCAAAAATTGGTGGATAAGATTTTCAAGGATTTTTGTGCCTGTTATTTTGGTTTTGGCC  
CTGCTTACCGCCTTAATTTGGTTCTTTTTGGACCAGCACCGGTCTGGAGCCATGCCCTAAATAATATGG  
TGGCTGTTTTGGTCATTGCTTGTCCCTGCGCTCTAGGATTAGCTACTCCCATGGCTATTATGCTAGGCAT  
TGGCCGAGGGGCCAAGTTGGGCTTGCTGCTCAAAGGGGCGGAGAGTCTAGAAGCCGCCAAGCCATTGAT  
GCCTTTGTCTTTGATAAAACGGGTAGCCTTACCGAGGGCCAAATGAAGCTTCAGGCAGAAGAATGGCGGC  
AATCTATGGCCATTATTGGCCCGCACTTTACGCCTTGGAAGAAACTCAGAGCATCCATTAGCCAAGGC  
TTTGCTAAACTTGAGCGAGCGCCCCAGCCATTTACCAAAGGTAGACCATTTTCAAGGCCGCTCTGGCCGA  
GGCGTTTTGGGCCAGATTGCTGGACAACTTATGCGGTGGGCAATCGCCAGTTATTAGTAGAGCAAGGGC  
TCGATCCTAAGGATTTAGCCCATGGACCTTGGCGAAGCTGGGAGGCCGAAGGCCAATCGGTCCTCTTTTT  
TGCCGTAGAACGGCAGCTCATTGCCGCCTTTGCCTTCTCCGATGTATTAAGAGATGGGGCCAAGGAAACG  
GTAGCGGCCCTACAAGCTCGTGGCATCAAGACCTATATGTTGAGCGGTGACCAAAAAGTGGTAGTGGACC  
GCCTAGCCAATGAGTTAGGCATTGCCCATGCCAAGCGGAACTCTTACCAGAAGATAAAATCAACTTCAT

TAAGGAGCTGCAGGCTCAAGGACTAAGGGTGGCTATGCTCGGAGATGGCCTAAATGATGCCCCGCTTTG  
GCCCAAGCCGATTTAGGAGTATCCCTAAATGCAGGAACAGGAGTGGCCCTAGAAGCTGCAGAAGCCTTGT  
TGCTCAAGAATGAACCCTGGCAGCTCATTCAACTACTCGATTTGGGCCAAGCGAGTATGAAAATTTTGCG  
ACAGAATTTATTCTGGGCCTTTGCCTATAATTTGCTGGGGATTCCCATTGCAGCAGGACTGCTTTATCCT  
TTTACGGGTTATTTATTGGATCCAATGTTAGCTGGCGCCGCTATGGCTTTTAGTTCGGTTTCTGTAGTGC  
TCAACAGTTTGCGCCTGCTCTTTGGCCATTTCCAAAATGGCTGCCTAG

>gi|268315578:1607644-1609509 Rhodothermus marinus DSM 4252 chromosome, complete genome105

ATGAAGAGCTTCACACGTCGTGATTTTCTGCAGGCCCTGGCGTTGCTGGGCATTTGACGGGGATCGAGG  
CGCTTCTGCCGGCCTATGCGCGCTCGCGTCCGCGCGTGGCCGCTCCCGTCGGCCACGCCGAGGCCCGGT  
AACCTACGACCTGACCATTGCCGAAACGCCGATCCGCATCGGCGGCCGAGGGCAAAGGCCACCACCATC  
AACGGCACGGTGCCGGGGCCGCTGCTGCGCTTCCGCGAAGGCGACGAGGTGATCATCCGCGTCACCAACC  
GCCTGAAAGAAGACACCTCCATCCACTGGCATGGCGTGCTGGTGCCCTTCGACATGGACGGCGTGCCGGG  
CGTGAGCTTTCCGGGCATCAAACCCGGTGAAACCTTACGTACCGGTTCCGGCTGCGCCAGCACGGCACC  
TACTGGTACCACAGCCACAGCGGGCTGCAGGAACAGACGGGCATCTACGGCCCGCTCATCATCGACCCGG  
CCGAAGAGCCCTATCCCTACGATCGCGAATACGTGATCGTGCTGAGCGACTGGACCTTTGAAAACCCATA  
CCGCGTGCTGGCCCGGCTGCGCAAGTACCCCGGCTACTACAATTTAGCGGGCGCACGCTGGCCAATCTG  
TTCGAGGAAGCCCGTGAGATGGGCTTCTGGAAGGCGCTGAAGGATCGGCTGAGCTGGGGCCGCATGCGTA  
TGGGTGCCACGGACATCGTGGACATCACCGGCGCCACCTACACGTACCTGATGAACGGCCACGCACCCGA  
AGACAACCTGGACGGCCCTGTTCCGGCCGGGCGAGCGCGTGCGGCTGCGGTTATCAACGCGGCGGCCGGC  
AGCATCTTCGATGTACGCATCCCCGGTCTGCCGATGACGGTGATTACAGCCGACGGTCAGTACGTGCAGG  
CGGTTACGGTCGATGAGTTTCGCATCGGCATTGCAGAAACGTACGATGTAATTGTCGAGCCGAAAGAAGA  
GCAGGCCTACACGATCTTTGCCGAGTCGATGGATCGCAGTGGCTATGCCCGCGGTACGCTGGCGCCGCGC  
GAGGGCATGGAAGGTCCATCCCGCCGCTCCGGAAGCGCCCGCTGCGCACGCACGCCGACATGGGCATGG  
TGCACGAAGGACACGAAGGCCATGCGGGCATGCCTCACGAGGCCATGGCCGCGCCACCGAACACCGGGG  
GCACCAGATGCCCGCCGACACGACCCGGACATCACATGCACGGCGGACATGACCACCATGGCGGACATGCC  
ATGATGGCGGGCATGATGGGCGGCGTGGGGCAGCCCGGGTATGCCACCGGAAGCGCAGCCTCACGGCG  
ACGACACGCACGGCCCGGCAACGCGGCCGTACCGATGATCACGCGCAGCCGCTGCACGAGCCGGGAGT

AGGCCTGGGCGAAGACGGCTGGCGTGTGCTGGTCTATACCGACCTCAAGAGCCTGCACCCCCGCGAGGAC  
TTCCGTCCACCCACCCGTGAGATCGAGCTGCACCTGACCGGCAACATGGAGCGCTTCTCTGGGGCATCG  
ACGGCAAACCTATTCGGAAGCGCCCGAGCCGATTCGTCTGCGCTACGGCGAGCGGGTGC GGCTCGTGCT  
CGTCAACGACACGATGATGGAGCACCCCATGCACCTGCACGGGATGTGGATGGAACCTCGAAAACGGCCAT  
GGCCGGCACATTCCACGCAAACACACGATCCTGGTCAAGCCGGCCGAGCGGCTTTCCGTGCTGATCACGC  
CGGACGAACCCGGTCCGTGGGTGTTCCACTGCCACATCCTCTATCACATGGAGATGGGGATGTTTTCGCGT  
CTTTGAAGTATCCGAACCGGAAACGGCAACCCGAACGTCATCATGA

>gi|313205511:1994409-1996637 *Riemerella anatipestifer* ATCC 11845 = DSM 15868 chromosome,  
complete genome106

ATGGATAATCAAAAAAATATTTATAAAAAATTGTTGCCGATAGTTCTAATGCTATTGGCAACTACAACCA  
TTTTCGCCAAAAAGTGGTGCATATGACCTTTACGTAAAAGACTATTGTTAATTTTACAGGAAAAGA  
AAAAAGGGCAATAGCCGTAAACGGACAAATTCCTATGCCAACACTCACCTTTACCGAAGGCGATACGGCA  
GAAATTCATGTTCATAATAGGCTCAGAGAAAGCACATCGTTGCATTGGCACGGATTGTATTTGCCAATA  
AAGAAGATGGTGTGCCCTACTTGACCCAAATGCCATTGAACCGAATACGACCCACGTATATCGTTTCCC  
AATTATTCAAACGGTACACATTGGTATCACAGCCACAGCGGACTGCAAGAACAAATCGGAATGTATGGC  
TCAATGGTTTTGCTCAAAGAGCAGACGACCCAACTTTAGAAAAGGCATTGATGATTTGCCTTCTGTGC  
CTATTATTTGAGCGAATGGACAGACTATAATCCTGATAATGTACACCGAATGTTGCACAATGCTAATGA  
TTGGTTCGCCATTAAAAAAACA CTGTGCAGAGTTATGCAGAAGCCAAAAAGCAGGACATTTCAAACC  
AAATTGACCAACGAATGGAAACGAATGTTGGCAATGGACGTGAGTGATGTATATTATGACAAATTCTTGA  
TTAACGGAACATCTGAAAGCCAACTCGCTCAATTCAAAGCAGGCGACAAAGTAAGGTTGCGAATATCAA  
CGGTGGTGCATCTTCCTATTTTTGGCTCACGTATGCAGGTGGAAAAATGACTGTCGTTGCCAATGATGGC  
AATGATGTTGAGCCTGTTGTGGTGGATAGACTAATTATAGGAGTTTCAGAAACCTATGATGTCATCGTTA  
CCATTCCGGCAGAAAATACTTCCTATGAATTTTTGGCAACACCCGAAGACCGAACTAAATCAGCATCTAT  
TTACATAGGTTCAAGTATTAAGCAGTTGGCAAGTCCATTGCCTAAACTGAAATACTTTGAAGGTATGAAG  
ATGATGAACGATATGATGAAAATGGATGGCACAATGAACGATATGGGTATGGATATGTCATTGCAACAAA  
TGGATATGAATACGGTAATGTACCCTGAGATTACAGGAGAAAATAAACCCAAAAAATCCGAACATTCAGA  
CCATAGCAATCATACAATGCCAGTAATGACATTGTTACCTTAACTACGCAATGCTGAAATCACCTACC  
AAAACCACTTTGCCAAAAGATGCACCTATCAGAGAATTAAGGTTTGAATTAACAGGCAATATGAACCGCT

ATGTGTGGAGTATGGACAACCGAGTGCTTGCTGAAACTGATAAAATTCTAATCAAAAAAGGAGAAATTGT  
AAGAATAACACTCTACAACAACCTCGATGATGCGACACCCGATGCACTTGCACGGACACGATTTTAGGGTT  
ATAAACGGGCAAGGCGATTATGCACCGCTTAAAAATGTTTTGGACATAATGCCTATGGAAACCAATGTGA  
TTGAGTTTGAAGCCAATTTAGAAGGCGATTGGTTTTTTCATTGTCATATTCTCTACCATATGATGGCAGG  
GATGAACCGAGTTTTTAGTACAGAAAACCAAGCACCCAATCCATTGTTGCCTGACAAAAAATGGGCTTAC  
AAAAAACTACAAAGAGAAAGCAACGAACTACATTTTATGTTTCAAACGACTTTGCAACAAATGGAAATG  
ATGGTATGACAATGTTACAAAATACCCGATGGAGTTTTGGCACTGAATGGCGTTTGGGATATAGCGACAA  
ACACGGATACGAAACAGAAACACACATAGGGCGATACATAGGCAGAAACCAATGGCTAATGCCCTTTATT  
GGCTTTGATTGGCGATACAGAAAGCACGAAACACCAGAAAAAATCTTTTTGGGCAGACTAATACCAAAG  
ACAATCGGACACAGTTTAGTTTAGGGGTTGCATATACTCTGCCAATGCTTATAATTTTACAAACAGAAGT  
CTATCACGATGGAAACGTAAGAGTACAATTAAGACGTGAAGACATTCCACTTTCAAAAAGGTTTAGAGCT  
GCATTTATGGTAAATACAGACAGAGAATATATGCTTGGACTGAATTATATCGCAAGTAAAACTTAGGTT  
TCAGAACGCATTACGACAGTGATATGGGTTTTGGAGTAGGACTGACATTTAATTATTA

>gi|327402011:c4250481-4248232 *Fluviicola taffensis* DSM 16823 chromosome, complete genome107

ATGGTTCTACAAAATATTCTTTCAAAAAAATTGCTGCCGATAGTATTTTTACTATTGGTCAGTAATAATA  
TATCCGCTCAAAAAACAGTTCGTTACGACCTTTATGTAAAAGACACTTTGGTAACTTTACTGGGAAATT  
CAAAAGAGCCATAGCCGTAAACGGACAAATCCCTATGCCAACGCTCGTCTTTACAGAAGGCGACACAGCA  
GAAATTTACGTTTATAATTTGCTTAAAGAAGAAACATCTTTGCATTGGCACGGCTTATTTTTACCCAACA  
AAGAAGATGGCGTTCCTAATTTGACGCAAATGCCAATCAAGCCAAATACTACACACGTTTACCGTTTTCC  
AATTATTCAAAATGGCACACATTGGTATCACAGTCATTCGGGTTTGAAGAACAAATAGGAATGTATGGC  
AATTTTATAATGCTCAAAAAATCTGATGACAAAACATTTGAAAGGGAAATTGATGATTTACCTACCGTTC  
CCATTGTATTAAGCGAATGGACAGACTTAAAACCTGAAAACATTCACAGAATGTTGCATAATGCCAACGA  
TTACCCAGCATTGAAAAAAAATGCCGTTCAAAGTTATGCAGAAGCCATTAAGCTGGGCATTTCAAACCT  
AAACTCAAAAACGAATGGAAACGAATGTTGGCAATGGATGTAAGCGATGTGTATTACGAAAAAATATTGA  
TGAATGGCAAATCCATTACCGACCTTTCAATAATTGACGGAAAGGAATTAAGGCAGGCGACAAAGTGCG  
TTTAAGAATTTCAAATGGTGGTGCTTCATCTTACTTTTTGGCTTACTTATGCAGGTGGAAAAATTACCGTA  
GTTGCTAATGATGGCAACGATGTAGAGCCTGTTGAAGTAGATAGATTGATTATTGCTGTTTCTGAAACCT

ACGATATTATTGTA ACTATTCTGCCGAAAATACGGCTTTTGAATTTTTGGCAACCACCGAAGACAGAAC  
CAATTCTGCATCATTATACATTGGCAACGGCATAAAACA ACTGAAATCATCACAACCAAGATTGAAGTAT  
TTTGAAGGAATGAAGATGATGAATGATATGATGAAAATGAATGGCGATTTGGACGATATGGGAATGAATA  
TGAGCCTAAATCAAATGGATATGAATGTGGTAATGTATCCGGAAATTA CTGGAGACAGCAAACCAAACA  
AAGTGATAACGACCCAAACCGATAACAACGCCAATGCTTTGGCAGATATTGTTACGTTAACTATGCAATG  
TTGAAATCACCCAACAATACTTCACTTCCAAAAGATGCACCCG TAAAAGAGTTAAAATTTACTACTAACAG  
GAAATATGAACCGCTATGTTTGGAGTTTAGATAATAGAGTAATATCTGAAACTGATAAAATTCTAATCAA  
AAAAGGTGAAAATGTTTCGTATCGTTTTATATAACA ACTCTATGATGCGACATCCAATGCACTTGCACGGA  
CACGATTTTCGTTTACTCAATGGTCAAGGCGCCAATGCACCCTTAAAAAATGTTGTGGACATTATGCCAA  
TGAAACCGATACATTGGAATTTAACGCCAATGTAGAAGGCGATTGGTTTTTTCACTGTCATATTCTCTA  
CCATATGATGAGTGGTATGGGCAGAGTATTTACTTATGAAAATCAAGCTCCAATCCTTTAATAACAAAT  
CCTAAATTGGCTCAACGTAACTATTTGCAGACGACCGTAAATTTCA TTTTATGGCAGACAACGATTTTG  
CTACCAACGGAAACGATGGAATGGCAATGTTACAAAACACTCGTTGGAGCATAGGTTTCAGAATGGCGTTT  
AGGCTACAATGATATGCACGGCTATGAAACCGAAACACATATAGGACGATACATTGGAAAAATGCAATGG  
CTGATGCCGTTTATTGGTTTTGATTGGCGTTACAGAAAAATGGGAATTGATGAACAAGAAGAAAATTTAT  
TCGGACAAGTAAATAAAAAAGACAACGAACTGCTGTAAGTTTAGGGTTTATGTACACGCTTCCAATGTT  
GGTGAATTTTCAGGCAGAAGTGTATCACGATGGAATTGTTGACTTTCTTTAATGCGAGAAGATATACCG  
ATTACGAAAAGAATAAGAGCTGGTTTTATGGTAAATACAGACAAAGAATTTATGGTTGACTTGC GTTATA  
TCATAAATAGAAATATGGGGATTAGAACACACTACGATAGCGATATGGGATTTGGAGTTGGACTGACATT  
AAATTATTA

>gi|325102757:1876259-1878529 Pedobacter saltans DSM 12145 chromosome, complete genome108

ATGAATATACCCATAAATAGTAAAATAAGGTTGCTGCAAGCAGTATTTATACTGTTATGTTTCGCAATCCC  
TATTTGCACAGAAAGTAGTGCATTACGACTTGTATG TAAAAGATACGCTTGTCAACTATGCAGGAAAAAC  
AAAAAGAGCCATTGCCGTAATGGGCAAATACCTATGCCACGCTCACATTTACAGAGGGCGACTGCC  
GAGATTGTAGTGCATAACCAGTTAAAAGAAAAGTACATCACTGCATTGGCACGGCGTATTTTTGCCCAACA  
AAGAGGACGGTGTGCCCTGGCTTACACAAAAGCCTATTGAAGCCGGAGCAACATACACCTATCGTTTTCC  
AATTATCCAACACGGAACGCACTGGTATCATTCCCATT CAGGTTTGCAGGAACAGATTGGAATGTATGGC



AGTTTTGTAATGAAAAAGCGGGATGACGACAAAACCTTTAGAAAGGGCATTGATGATTTGCCTACCGTAC  
CCATTATTTAAGCGAATGGACAAATTATAACCCCAACAACATTAACCGAATGTTGCACAACGCCAATGA  
TTGGGCAGCTATCAAAAAAGGTGCAACACAATCTTATGCAGAAGCTATTAGAGAAGGGCATTTCAAAACC  
AAATTAACCAACGAATGGAAACGTATGTTGGCAATGGACGTAAGCGATGTGTATTATGACAAAATATTAA  
TTAACGGAAATCATACTACCGATTTAAAAACCGTTGACGGCAAAATACTAAAAGCAGGTGATAAAGTAAG  
GTTAAGAGTTTCAAATGGTGGCGCATCCTCTTACTTTTGGTTACGGTATGCCGGAGGTAAAATTACCGTA  
GTAGCCAATGATGGTAACGATGTAGAACCTGTTGAAGTAGATAGGTTAATTATAGGAGTTTCTGAAACAT  
ACGATGTCGTTGTAACAATCCCCGAAGAAGGTGTTTCTTATGAATTTTTAGCCACTACTGAAGACCGAAC  
ACAATCAGCCAGTTATTTTTAGGTAATGGTATCAAACAATTAATTTCCCACTGCCCAAATTAATAAT  
TTTGAAGGGATGAAGATGATGAACGATATGATGAAGATGAATGGTGATTTGGACGATATGGGAATGAAAA  
TGAGCCTGAACCAAATGGATATGAACGTGGTAATGTATCCCGAAATTACAGGAGAAGCCAATCAAAGCA  
AGACCATAGCCAACACAATATGAATATGGATAACGACCCCAATCGTTACAATGCAAATGCTTTAGGAGAA  
ATTA AAAACCTAAACTATGCAATGTTGCAATCGCCCTACAATACTTCACTTCCCAAAGATGCACCCGTAA  
AAGAACTAAAATTTACACTTACCGGAAATATGAACCGCTATGTGTGGAGTATGGATAACAAAATTTCTTC  
AGAAGTTGATAAAATTCCTGTAAAGAAAGGAGAAATTTACGCATCACCATTTACAATAACTCAATGATG  
CGACACCCAATGCACCTGCACGGTTTCGACTTTAGAGTAATTAATAGAAAAGGCGAAAAATCACCCTGA  
AAAATGTGTTAGATATAATGCCAATGGAAACAGATACCATTGAATTTTTGGCAAACGAAGAAGGAGATTG  
GTTTTCCATTGCCATATCCTATATCATATGATGTCGGGGATGAACAGGGTTTTTGCTGTGGATGACTAT  
AAAAATCCAACTTACCCAACAAGAAACAAGCATACAATAAATTACAGAGAGAGAGCAATATGCCACATT  
TTATGGCACAGAACGATTTTGCAACCAATGGTAATGATGGCGAGGCAATGTTTCAAATGCAAGATGGAG  
TTTAGGCACAGAATGGCGTTTAGGTTACAATGATATGCACGGTTACGAAGTAGAAACACATTTAGGAAGA  
TACATCGGAAAAATGCAGTGGTTTATGCCATTTATAGGCTTTGACTGGCGTTACCGTAAAATGGGAATAG  
ATGAACACGAAACCAATTTATTCGGGCAGAAAAACGAAAAAGATACACGTAGAGCCTTTAGTTTAGGTTT  
TATGTACACCTTGCCAATGTTAGTCAATTTTCAGGCAGAAGTATATCACGATGGTATCGTTCGCCTGTCT  
TTAATGCGAGAAGATATACCAATTTCAAAAAGATTAAGAGCTGGTTTTATGGTCAATACCGATATGGAAT  
ATATGGCAGACTTGAAGTATATCATCAATAAGAATATAGGTATTCGTACACACTATGATAGTGATATGGG  
CTTGGGTATAGGGCTGTCACTAAATTATTA

>gi|312128809:c582187-579914 Leadbetterella byssophila DSM 17132 chromosome, complete genome109

ATGAACAGATATAATAAAATACCTATAAGAATTTTGCAAACAGTGCTGATACTGCTTTGCACGCAAACGC  
TGTTTGCACAGAGAGTGGTGCATTACGAGCTGTATGTAAAAGATACGCTTGTCAACTATGCAGGTAAGCA  
AAAAAGGGCAATTGCCGTAAACGGGCAAATCCCCATGCCACCCCTTACCTTACCGAGGGCGACACTGCC  
GAAATAGTGGTGCACAACCAATTGAAAGAAAGCACATCACTTCACTGGCATGGTGTGTTCTGCCCCAATA  
AAGAAGACGGTGTGCCCTGGCTTACACAAAAACCCATCGCACCGGGCACAACCTACACCTACCGTTTTCC  
GATTATCCAGCATGGTACGCACTGGTACCATTCCCCTCAGGATTGCAGGAGCAGATTGGCATGTACGGA  
AGTTTTATCATGAAGAAAAGAAGCGATGATAAGACATTCAGAAAAGGAATTGACGATTTGCCGACCGTTC  
CAATTATATTAAGTGAGTGGACAAATCTTAACCCCGATAATATCAACCGTATGCTACACAATGCAAATGA  
TTGGGCGGCCATTAAGAAAGGCGCAACACAATCATATGTTGAAGCTATTAAGGAGGGAAAATTTGGCGTG  
AAAGTAACCAATGAGTGAAGCGGATGCTGGCAATGGATGTGAGCGATGTATATTATGATAAAATCCTTA  
TCAATGGCAGCAATGCACCGGAGCTAAAAACGGTTGACGGCAAAACCTTAAAGGCGGGGGACAAAGTACG  
GCTTCGCATATCCAATGGCGGTGCATCTTCCTATTTCTGGCTGCGTTACGCCGGAGGTAAAATTACAGTA  
GTAGCGAATGATGGGAATGATGTTGAGCCTGTAGAGGTGGACAGGTTAATCATTGCCGTTTCTGAACTT  
ACGATATTGTAGTGACTIONTCCCTCAAGATGGTTTGGCTTACGAGTTCTTAGCAACAACCGAAGACAGGAC  
ACAATCTGCGAGTTACTTTATAGGTGATGGGGTCAAACAGCTTATTTCTCCACTCCCACGATTGAAGTAT  
TTTGAGGGGATGAAGATGATGAACGATATGATGAAAATGAATGGCGATTTGGACGATATGGGCATGAAGA  
TGAGCCTTAACCAAATGGACATGAATGTAGTGATGTATCCCGAAATTACCGGAGATGCAACAAAAAAGC  
AGACCACAGTAAGCATGAGGGTATGGATATGGATAACGACGCTAACCGTTACAACGCTAATGCTTTGGGA  
GAAATCAAAACATTAAATTATGCAATGTTACAATCGCCACACAATACTACTCTTCCTAAAGATGCACCCG  
TAAAGGAGCTGAAATTTACTTACTGGCAACATGAACCGCTATGTATGGAGCATGGATAATAAAATACT  
TTCGGAAACAGATAAAATTCCTGTAAAAAAGGCGAAGTCCTGCGGATTACCATATATAATAATTCAATG  
ATGCGGCATCCAATGCATCTTCACGGATTTGATTTTAGGGTTATTAATGGAAAGGGAGAAAAATCTCCAT  
TGAAAAATGTTTTAGATATTATGCCAATGGAAACCGATATTATTGAGTTTTTGGCGAACGAAGAGGGTGA  
TTGGTTTTTCCATTGCCATATCCTTTATCATATGATGGCAGGAATGAACAGGGTGTGTTGAAGTTGGAGAC  
TATAAAAACCCTTACTTACCCGACAAGGCAAAGCCTATAAGGAATTGCAAAGAGAAAGTAATATGCCTC  
ATTTTATGGCACAAAATGATTTTGAACCAATGGTAATGATGGAGAAGCTATGCTGATGAACGCACGTTA

TCAATTAGGTAAGTGAATGGCGTTTAGGTTATAATAGTATGCATGGTTATGAAGTAGAAACCCATTTGGGA  
AGATATATTGGTAAGATGCAATGGTTCATGCCGTTTGTAGGGTTTGTATTGGCGATACCGTAAAATGGGAG  
AAGATGAGCATGAAAAAACATCTTTGGACAAATCAACAAGAAAGATACCCGAAGAGCCTTTAGTGTAGG  
GTTTATGTACACCTTACCTATGTTGGTCAATTTTCAGGCAGAAGTGTACCATGACGGAATTGTCAGATTA  
CAGTTAATGCGTGAAGATATTCCTATTTCAAAAAGGTTAAGGGGGGGCTTTATGGTAAATACTGATTTAG  
AATATATGGGTGAACTCAGATACATCATCAATAAAAATATTGGTATTCGCACCCACTATGATAGTGATAT  
GGGCTTCGGCGTGGGACTGGCATTGACTTATTAA

>gi|284005577:6864-9704 Spirosoma linguale DSM 74 plasmid pSLIN01, complete sequence110

ATGAAACGTTTTTTCTCATCACCTGTCTTGTCTGGTGTACGGCCAGCAATGGACAACATCAACAGC  
ACACAATGCCCGATGCCAATCGGTTCGGCTGAGCAACCTCACAATCCTGACAAGTCTAACTCCCAGCTGT  
CAAAACAAGTTTACCAGTGTGCGGCCACAGGCGTTGGCGAACGTAAAGCCGACAGGGAAACGGGTACCG  
TATGATCTGATCATTGATGAACAGATGGTTAATATTACGGGCAAACCCAAAAAGGCCATGACCATAAACG  
GTGGGATTCCCGACCCACCATGCGGTTTACAGAAGGTGATGTAGCCGTTATCCGGGTTTCATAACAACT  
GAAAACAGAACTCACTGCACTGGCAGGCATCCTGCTCCCAACAAACAGGATGGTGTTCGTATTTG  
AATACCCCCCTATTCAAGCGGGCGACACCTACACGTTTGAGTACCCCTCGTTCAGTCAGGTACGTACT  
GGTTTCACTCCACACGCGCTATCAGGAGCAGATTGGCGTATACGGCTCGATTGCCATTCAACCTCAGCA  
GCCCACTCACAAAGTAGATCATGATTTGGTGTACTATTGTCGGATTGGACGGATGAAAATCCGGCCCAT  
ATCCTGAAAAACCTGAAACGGCGCAACGAATGGTACTCGATCAAAAAACAATGTCCAATCGCTCAACC  
GCATTATTCAGCACAAAGGCCGTGGGGCGTACCTGCGGCAGTCGATGATGAAAATGGCACCGATGGATAT  
TTCCGACGTTTACTACGACCGTTCTGGTAAATGGAAAAGACACGGTTCGATACCCGGAAATCAAAGCA  
GGTCAAACCGTTCGGCTTCGGGTTATCAACGCCAGTTCGCTCCACCTATTTTACGTTAATTATGCCGGTG  
GTCCCATGAAGTTGATTGCTGCCGATGGTCTGGATGTTCAACCGGTGGACGTTGACCGGCGGCTAATTGC  
CATTGCTGAGACCTATGACTTTATTGTCAGTGTCCAAACGGTGGCGCTTTTGAAGTACGGGCGACGGCA  
CAAGACGGTTCTGGTTACGCAACGGCTTTGCTGGGAAAGGGTAAGGCGAAGTACGCCCCACTATCCCC  
GCCCCGATCTGTATAAATTAACCGCCAACATGAGTCGAATGGGGGGGGTGGGCATGGGTACGATGAACAT  
GGGCAAACCGACACAACCTGCTCAGACTAACTCCGACATGAACGGCCCCATGATGCACGATATGGCCGGG  
ATGAATCATGGGGCTAGCCAACAACCCGTAAATTCGGCAAACCGGGCACCAAAGAACCAACCATGGGGA

ACATGGACCATAGTCAGATGCAGATGGGACAGACTAAGCCAGCACAGGCCGTACCCGTCAAACCGAAAAA  
GCAGGATCCGATGGCCGGGATGGACCACAGCCAGATGGATATGGGTGAAAAGCCGTCTGCCAAGCAGCCG  
ACTCCGGCAAAAAAGGCCTCAAAGCCGTCAAAGCGGTTGGATCAATGGCTGGGATGGATCACAGTGGCA  
TGAACAGGGACGGCATGAAAACGGCCAAAGATGGTAAGATGGACATGACGGGGATGGACCATGAACAGAT  
GGACCACTCCTCCATGCCC GCGTCGGCGGACCGGGGCATGGATCATAGTAACATGGCCATGAAAATGGAT  
TCGATGCCCACTACGAAAACGGACAGCAAAAAGCCGGATGACATGGCTGGCATGGATCACAGCAAAATGA  
ACATGGACAGTAAACTGGCGATATGGCCGGGATGAAAGGAATGAGCAGTGGGGGCGGGGGTATGGAAGG  
AATGAATATGATGGACGAGCAGAATACCATCGACTACAGCGTTCTCAAGTCTCCCGAACCGATTGTCTTT  
CCGGCGAATCGCCCTATCCGCGAAATACCGCTCACCTGTCTGGGCAATATGTTCCGCTACATCTGGGGCT  
TCAACGGACAACCACTGTCCCGTGCGGATATGATTCAGATTCGGCGGGGCGAAATTGTGCGTATCCGTAT  
GACGAACAATACCATGATGATGCACCCGATTCACCTGCATGGTCATTA CTCCGCTACTGAACGGGCAG  
GGTCAGTATTCACCCCTGAAGCATACGGTGAACGTATCGCCCATGAAAACGTCACGATTGAGTTTATGG  
CTGATGACGAGAAAGACTGGTTTTTTCACTGTCACCTACTGTATCACATGCTAAGCGGAATGGCCCGCGT  
GGTTAGCTATGGCGACAAACCGGACTCATCCATTGCTGCTATTCAAAA ACTTCACCTGCGCGACATGCGC  
GATAATCAGCCGTTTGTCTGGGGCTTCCTGCAACCCGTTATCCGATCAACTATTTTAGTCTAAATGTCT  
CTACTAACAAAAACGCCATCGTTGCCGGGGGAGACCACGACTGGCGCACAAATCGGTTTCGAGTTCGACTT  
GGACTATGAACGCTATCTCGGCGATTGGTTGCGGGTGTTCGCGGGATTGACGGCGGGAATGAAGAGTTT  
TTGCGCCGGGTACGGCCCGAAGATGGGGTTCGTTACCGACCGCGTATCGTCCGGGCTGTGGCGGGTATTC  
GGTATATGTTGCCGTTTTT GATT CAGTCCGAAGTAAACTCGATACACGCGGTAACGTC CGTTTTCCAGCT  
AAACGGCCAGCAAATGTTGTTTCCCCGCTGGATTTCCAGTATCAAACG CAGTGGTTAGTGGGGAGTTAT  
GTGCGGGCGCATGTTGAGCTACAGTACACCGTCACCAAAAATCTGTTTCTGCACACCGATTACGATACCC  
GGTACAAAACAGTTGGTGGTGGGCTGGGTTACAATTTCTGA

>gi|13357558:246891-249020 *Ureaplasma parvum* serovar 3 str. ATCC 700970 chromosome,  
complete genome111

ATGTTAAAGAATAATTTAATTA AAAAATTTCAATTA CTACCTATTAATAAAAAGAAGATATTTAATTTCTT  
TAATGAAAACATCAATAGCACTTCTAATTAGTATTCCTTTAATGGTTTTT GAAATGCTATTTATGTTTAA  
AAGTAATTTAATTTAAGCATTGATGGTTATTTTATATATGGATGAATTGTTTTTGTTTTAAGTATTTTC  
ATTGTCTTTGGTTTAGTTTTAGTTTTTTAAGGGTGCTTTTTTTGAAGTTTTTAAATGAAAAAACCTG

GAATGCTTTACTTGTTGTTATTTCAACATGTGTTGCTTTCATATATAGTACTTATAGTTTAATTTCTAA  
CACAATTATTTATGAACCTAAACTACATGGTTTTTTTGAACAGCTTGCATGATTATAGCGACAATGAGT  
GTTGGTCAATTAGTTAGTGATCGTATTAACCTAAAAGCAAATCAAGATCTACAATCTTTAATAATTTAC  
AAGTCAAAAAATATAATAGTTATGATTTGAACACAAAACAAGTTAGTGAAAAAGTTGTTTTCAAGCTAA  
AATTAACGAATACGCACTAGTTAAAAAAGGTGAAATTGTTCCATTAGATGGCGTATTATATTCACAAATT  
GCTGAAGTTGATGAATCATCATTAACTGGTGAAGCTCGTCCAATTCTAAAAACAATTAATAATGATATTA  
TTGCTGGATCAATTAATGTTGGAGATAATTTATTTTTAAAATTACTAAACTTTATAATGATTCAACGAT  
TAAAAAATTATTAATGGTGTTAATCAAATTGCTAGTAGCAAGCCAAAAATTCAAGTTGTTGCTGATAAG  
ATTCGTTATGATTCCTCATTATCTTATAATGGCCATTCTAGCTTTTTTACTACAAGCTTTTGTAC  
CAAGTATTCAAGAGTTACCAATTGCTTTTTTAAATCTTCATGGATCAAATAATGATTCTAATTTATATGA  
AAAAGCAGCATATGTAGCAGTTTCTGTTCTAGTTATATCATGTCCATGTGCATTTGGTATTGCTGTGCCT  
TTAGCAGTTTTAATTGGTGCAGGGCATGGTGCTAAAAGTGGGATTACATTTAACAATAGTAATTTTTTG  
AAAAGATTA AAAAAGTTAATGCAATTGCTTTTGATAAAACAGGGACATTA ACTTATGGAAAATTACAATT  
AAAACAAGTTATAGGAAATGATCAATTTTTAGATTTAATTTATCAAATGGAATTAATTTCTTTACATCCA  
CTAGCAAAATCATTGTA ACTTATGCCATTATTAATAATATCGTCATGAGTACAAAATTAATTGATATTA  
AAGAAGTTGCAGGAGTGGGGATTATTGCTAAAGATGTTGATGGTAATATTTATGAATTAACATCAGAACA  
TTATGCAAATGAAAATCAATTTGATTTTTTATTGATTAATCAAAAATCTTCTACTTCTACTAATTTATTA  
GCTTCAAATATTATTTTTAGTATTAACAAAAGGTGCAATCAATTCTGTTTTTGAAGATGAAATTCGTG  
CTGATGCTTATGAAACAATTAAGGTATTGCATGAAAATAATATTGAACTTATATGATTACTGGTGATAG  
TTTTAATGTTGCTCAAAAATCGCAAAGGAATTAGGAATTAACATTTTTATGCTCAAGTTAAACCAGAA  
GAAAAAGCTAACATTATTA AAAAATTCAAAATGATCAAAAACCTGTAATGTATGTTGGCGATGGTATTA  
ATGATTTATTAGCTTTAAAACAAGCTAATGTTTCTATATCAATTGGTGAACTAATAAAGCAACTAATGC  
AGTTGCTGATATTAGTTAATCAAACCAGATTTTTAAATTTTACAAAGTAATTA AACTAACAAAAATT  
ACTAAGATGTTTATTGTAAGTAGTTTACTATGAGCGTTTGGTTATAATCTAATTTTTATTCCACTAGCAT  
TAATTGGTATTATTCCACCATTTATTTCTGTTTTAATTATGACA ACTAGTGATATTGCTGTTGTATTA  
CTCATTAATTTTTAGATTATTA AAAATGCGTCTAGTTAATAAAAAGCAAATTCATAAACTTAATTTAAA  
ATTATCAATGAGGCTATGTTACATAAATAA

>gi|525938956:546649-548553 Spiroplasma taiwanense CT-1, complete genome112

ATGACTAGAAAAGTTAAAAATAGAATTTTATTTTATTGTTTAATACTACTTTGATTATTAGGTATTTGAA  
TTGTAGTATCAATGTTTTAGCAAATCAAATAATTGATTTATTATGATAGGTCATAATAAATTCTTTT  
ATTATCAATTGCTATATTTGTTATTTATTTTTTTGGGTGAAAGTATATTCATAGATGTTATTTAGAAATT  
TTTAAATGAAAAAGAATTGGAATGAACTTTCTAGTAACTATGTCCACTCAAATTGCACTTTATTTTTCAA  
TATACGAAATTGCAGTGGGGTTATTTCCAAATTTAATTGAAGTTTCAATTTTTGTAATTTTTATTTTTACA  
AACAGGAGATATAATTAATGACAAATTAAGAAAAAAATTTCAAATGAATTGAGTGAAATTACAAAAATT  
CAACCAAAAACAGTAAAAGTCATTTTAAATAATGAAATTATTGAAAAAATATTTAAACTGTTGAAATAG  
GAGAAATTATTTTTATTGAAAAAATTTGTAATTCCAATTGATGGAAAATTGATAAATGAAAAAGCTTC  
AGTTTTAACCCAAATAATTGATGGTGAAAATGATTCAAAAACTTTTTTTTAAAGATCAAAAACCTATTGCT  
GGAATGCAAATTTAAATCAAGATTTAAAATGGAAGTAAATAATTTATCAAAGACTCTTTATTAATC  
AAATGATTTCAAAAATATTAATAATCAATCTACAAAATCTGGAATGCAAATTTAGTAGATAAATTATT  
AATTTATTTACACCATTCTAATTTTATGTTCAATTATTGGATTTTTAGTTTCATATTTTTGATTAAT  
CCAAATAATCTTTATTTGCAATGCAATCATTGTAACAATTTGATTGCAGCCTGTCCTTGCAATTG  
GTATTGCAATCCAATAGCAGTTGCTATTGGAGCTTCAAATGCTGGAAAAAAGGAGTAATTTTTAATAA  
ACCTGATGCTTTTCAAAAATTAATTGGAATAAACATATTGCATTTGATAAACAGGTACTTTAACTCAA  
GGACAAGTAAGTGTTAAAACTATCAAGGAGAATTCAAATATTTATCAATTATAGGACTTATTGAAAAAA  
ACCAAATACATCCACTTGCAACGGGTTTTATGAAATATTTAAAGGAAAAAATATTGAGCTTAATTCTAA  
TAGAATTATTGAAAACTTGGAGAATTAGAATACAAAATTGATGAAAAATTTATAAATTAGTTTCATTA  
AATGATTTAGATAAAAAATTGGATTCAGATATTAGTATAGATTATTCTTATTTAGAAAACACAACCTTCT  
TTTTACTTGAAGAAAATAGGGTAGTTGCTTATATTGAATTTAGTGATGAAATTAGAAAAAATGCACTTAT  
TTCCTTAGAAAAATTAAAAAACAAAATTACAATTAATAATGATTACAGGTGATAATGAAATTATTGCT  
AATAAAGTTGCATCAACTTTAAAAATTGATGAAGTATATTCAAATCAAAAAGCAAATGACAAATATGAAA  
TAATAAAAAAATATCAAGAAAAAATCAAAAAGTGGTTTTGTGGGTGATGGTGCAAATGATGTACTTGC  
AATCAACAAGCAGATTTGTCAATTTCAATAATATCACCAACAACCTATTTATCATTAGATTCAGATATT  
AGTTTAATAAAAACCAGACATTGAATTAATTGTAATGCAATTTACTATACTAAAAAACTAGAAATATTA  
TTTTAACCAATTTATTTGAGCTTTTGCATATAATTTTACAATAATATCGTTAGCAATGTTTGGATTTAT

AACTCCTTTAGTGGGTATGATTGTAATGTTTTGTTCAACTTTATTAGTTTTATTAATTCATTGTTATTT

AAAATTTCAAATAA

>gi|651865246:977671-979821 complete chromosome Acholeplasma palmae113

ATGAGAAAGAGTGTAAGTAAGTAATATAACATGTGCACAATGTGCTAAGACAATTGAGAACTACTATA

AAAAACAAGATGGTGTAGATGCCAAAGTATTAGTAAGTGCTAAAAAAGTGATTTTTAATTATGACGAAAG

AAAAACAACGAGCATACTGTTAGAAGGACTTCAAAGTATTGGTTACTACCCAGTCATTAATAGTGAA

GATCAAATAAAGGCACTTAGGAAAGACAGAATAGATCTATTTATTGCAGTTATATTTTCTATTCCATTAT

TATGGACTATGTTTGCTCACTTAAACATTCCTCTACCAGTACCTGATATTTAATGAATGGATATTTTCA

ATGGATCATTACTACCCAGTTCAATTTTACGCAGGGAGAAGATTTTATAAAGCTGCTTATGAACAACCTT

AAGAATAAAGCTTTTGAATGGATGTTTTAGTAGTTATTGGTACTATGGCTGCCTATATTTACAGTATAT

ACCAAGTATTTATGCACCATGGTACATCACATCACTATGATTTGTACTTTGAAACAAGTGCAGTTATCTT

CTTGATGGTTTTAATAGGTAATTACTTTGAAAGCCGTGTAAGAAACAAAGTGAAGTGCCTTACAAGCC

TTAATGAGTCTAGGAGCTAAAGAAGCTAGAATAAAATTAATAATGAAACTCAAAGTATTAGTTGAAG

AAGTTAAATAGGCGACATCGTTGTTGACTAGCAAATGAAAAATTCCTTTAGATGGAAGTGTAGTATC

AGGAACAAGTTATTTAGATGAATCTATGATTACAGGAGAATCAATGCCAGCCTTTAAAGAAATAGGATCA

AAGTTGTCGGCGCTTCAATGAATTTAACTGAAACCTTAGAAATAAGCGTGAGCGCAACCGGAAGTGATA

CTGTACTTTCTAAAATTATTCAAACGGTTGAGGAACTGCACTTATCAAACCTAAAGTACAAAGGGTTGC

TGATAGAATCGCAAATATTTTGTGCCAGCTGTTATTGTAATTAGTATTTTGGTTTTTATTATTCAATTA

ATTATTTCTAAAGACATTAATATTGCCTTTAGCACTTCAATTGCTGTCTTAGTGATTAGTTGTCCGTGTG

CCTTAGGACTAGCAACACCTACAAGCATTTCAGTTGCTAGTGCCATATCATTTAAAAAAGGTATTTTATA

TAAAGGTGGAGAATTCTTTGAAATAGCTCATGAACTAAAAGCAATCGCCTTTGATAAAACTGGAACACTA

ACTAATGGTACACCTAAAGTTGTTGGTTTCTATGGAGATAAAAGCACATATGCATATACGGCATCACTAG

AAGCTCACTCTAATCATCCACTTGCAGTACTAGAAGACTTTACAGATGAATACTTAGAAGTAAA

AAGTTTTAATGTGCTTTTAGGGATTGGACTAAACGGAATGATTAATGGAAAAATATCTATGTGGGGTCT

AAGAAGATTTTAGATCAATTAAGATTGAACAAACATTTGATACCTACGAAACTTTAAGTTCTGAAGGTA

AAACAGTTATCTTTACAATTGTTGATGGGATACTAGTGAATATGATTGCTATCCAGGATGAACTTAAAGA

AAGTGCTAAGAATTTGATTTTAGAAGTAAAGAAATATTACACCTTACATGATTACTGGAGATAAT

GAAAAAACTGCCACCTATATTGCAAGTCAAGTAGGGATTGATAAAGTCTTTTCAGAAGTCCTACCACATC  
AAAAAGCAGAGATCATTAAAGATATTCAAAAACAAGGTTTTAAGACTGCGTTTGTTGGGGATGGAATAAA  
TGATGCTCCAGCACTTAAAATGGCAGACATTGGGTTTGAATTGGCAGTGGAAGCGATATAGCAATTGAT  
ACATCTGATGTAACCTTAATGTCGTCAAGCTTAGGATTAGTAGTAGATGCAATTGATTTATCGAAAGCAA  
CATTAAAGGAATATTTATTTGAATTTTTCTGGGCTTTCATATATAATATAATTATGATTCCAGTTGCGGC  
AATGGGTTTTATCAATCCTGCACTTGCTGGAATTGGAATGGGATTTTCAAGTATCGCAGTAGTGCTTAAT  
GCACTCAGCTTAAAGTTATTTAAATTTAAATATAAGGAGAATGAAGAATGA

>gi|33241335:c983966-981990 Chlamydomophila pneumoniae TW-183, complete genome114

GTGTTCTCCCGTTTGTTTTCACTTCATTTTCTGCAGAAGTAGTGAATACATTTTTTGAATCAGGGATGT  
CTGAAGATACGAGTCCCCTTCTATCTAAACAAAATCGCAAATTGAGTCACAATCTTCCTTAAAATCGGC  
GTATTTATCTTTAGGGACCTACTTGATTGCTCTTCTAAGTTTCTGGCTCCATGCAAAAAATCTCTCTAAC  
TTATTTGTAGTATTTACATTTTTTCTTGCTGGCACTCCTGCTCTGATTAAGTCGTTAGATAACATATGTC  
AAAAGGTAGTGAACATTGATATTTTGTGACATCAGCAGCCTTCGGCTCTATTTTTATTGGAGGAGCTTT  
AGAAGGAGCCTTGCTTCTGTCTTGTGTTGCGATTTGAGAAGCGTTGGGACAGATGGTATCGGGGAAAGCA  
AAGAGCACTTTAGTCTCTTTGAAGCAGCTCGCTCCTACTACGGGTTGGCTTGCTTTAGAAGATGGCAACT  
TACAAAAAGTCGCAATCAACAAGATTGAGGTTGGAATATCCTACGCATTAAGTGGCGAGGTTGTGCC  
TTTGGACGGAGAAATCCTTCATGGTTCTTCTCTATCAACCTCATGCATCTTACTGGAGAAAAAGTTCCT  
AAATCCTGTCATCCAGGGTCGATTGTTCTGCGGGAGCCATAATATGGAAGGGAGTTTCGATCTTCGTG  
TCTTACGTACGGGATCGGATTCTACCATCGCTCATATTATCAATTTAGTCATTCAGGCACAGAACTCTAA  
ACCTAGGTTACAGCAACGCTTAGATAAATATTCTTCAGTATATGCTCTCTCTATTTTTGCAATTGCCTGT  
GGAATTGCCCTTTTGGTTCTTTATTTACTTCCATTCCATTGTTAGGACCTCAGAGTGCATTTTACCGTG  
CCCTAGCGTTTCTTATTGCAGCGTCTCCGTGTGCTTTGATCATTGCGATTCTATTGCCTATTTAAGTGC  
TATCAATGCCTGTGCGAAACATGGGGTTCTCCTGAAAGGCGGTGTGATTTTAGATCGTTTAGTTTCTGT  
AATTCTGTAGTGATGGATAAAACGGGAACGTTAACGACTGGCGAGCTTACCTGTATAGGTTGCGACTACT  
TCGGTTCTAAAATGAGACCTTTTTCCCTTCAGTATTAGCTTTAGAGCAGTCTTCATCTCATCCGATTGC  
TGAGGCTATTGTTTCTTACCTTATGGAGCAGAAGGTATCCTCGCTTCTGCAGATCGGTATCTTACAGTT  
CCTGGAGAGGGGGTTCGTGGCTATTTCAATGAACAAGAAGCTTTTGTAGGTCGGGTAGAAACAGGACTAG



GGAAGGTGCCTTCTGAGTATCTTGAAGATATAGAACAAAAAATTTATCAGGCGAAGCAACATGGGGAGAT  
TTGTTCTCTAGCGTATGTTGGGAATAGTTTTGCTCTATTTTATTTTCGAGATATTCCTCGTCCTCAAGCT  
AAAGAAATCATTCAAGATCTCAAAGATCTCGGCTATCCCGTGAGCATGCTCACGGGAGATCATAAAGTCA  
GTGCTGAAAATACAGCGGAAATTTTAGGAATTTCTGAGGTATTTTTCGATCTCACCCCTGAGGATAAGTT  
AGCGAAAATACGCGAGCTTGCAACACAACGTCAAATTATGATGGTCGGCGATGGAATTAATGATGCTCCT  
GCTTTAGCACAAAGCTACTGTAGGCATTGCTATGGGAGAAGCTGGAAGCGCTACAGCAATAGAAGCTGCTG  
ATATTGTTCTCCTGCACGACTCCTTGTCGTCCCTCCCTGGATCATTCAAAAAGCAAAACAAACGAAAA  
AGTTGTTTCGCAGAACCTTGCACTAGCGCTTGCTATTATTCTTTTAGTCTCCTGGCCTGCATCGTTAGGG  
ATCATTCTCTATGGCTCGCGTAATTCTTCATGAGGGAAGTACGGTGATTGTGGGGTTAAATGCTCTCC  
GTTTGCTGAAAAGTTAG

>gi|46445634:136133-138322 Candidatus Protochlamydia amoebophila UWE25 chromosome,  
complete genome115

ATGGAGAAAAAAAATTGTTAATTCGAGGGATGCACTGTGTTTCATGCGCGCAAAATCTTGAAAACAGTT  
TGAAGAAAGTTTCTGGATTACAAGAGATTCATGTTGATTATTCGACTAGTCAAGCTGATATTATTTTTGA  
CGAAAACAAAGTTTCATTTGCCTCACTAGAAAAGCATATAAAAAAATGGGATATGAGAGTTATTCATTT  
AGGCCTCTTTAGATGAAGATAGACGAATAAAGCAAAAAGAAATTCAAATACTTTTAAAACCTTTTTGA  
TCGCTGCTGTTTTGTCTTTGCCTTTTGTTGATTGAGATGTTGGCGATGATGTTAGGATATGCTTTTTCCAT  
TCCTCCAACATGGCAATTTTTTTTAGCCACCCTGTACAATTTGGGTGTGGAGGAACATTTTATCGATCC  
TCTTTTTATGCTCTTAAAACTGGCAAATTAATATGGATGTTTTGGTTGTTTTGGGATCAACTGCGGCTT  
ATCTATTTAGCTTTTATGTTTATCTTTTAAAACCTTCTTACTCTTTTTATTTTAAAAGTAGCGCGCTCAT  
TATTACATTGATTTTATTTGGACGTTGGTTAGAAGCCGTCCTAAAGGAAAAACCTCTAAAGCACTAGAG  
CGTTTATATCATTTACAGCCTAAAATTGCTCGTATTGAAAAAATGGTGAATTATAGAGGTTGATGTTG  
CCTCGATTCAAGTAGGTGATATTTTTATGGTACGTCCTGGAGATCATATCCAGTTGATGGATGGGTGAT  
AGAAGGAGAGTCTCCATCAATGAATCTTTGTTAACGGGAGAAAGTTTGCCGTTTATAAGAAACAGGGA  
TCGAAACTTTATGCAGCGACAATCAATGAACTGGTTACTTGAAAGGGCAGGCCTCTTCAGTTGGATCCG  
ATACAATTTTAGCTCAGATACTTCGAGCTGTAGAAAAGCTCAATCTTCGAAAGCACCTATTCAAAAATT  
TGTGGATAAAATTTCTGCAGTTTTCGTTCCCTGCGTACTTCTAATCAGTTGTTTGACGATATTAATTTGG  
ACATTTCTAATAGGTGATTTTACAAATGGATTGATTAATGCGGTCTCTGTTCTAGTGATTGCATGCCCTT

GTGTTTTAGGATTAGCCACGCCGGCAGTTCTTGTGGTAGCAAGTGGGGTTGGAGCACAATACGGAATATT  
TTTTAAACAAGCTTCATCGATCGAGCAGTCTGAAAAATCAAATTTTTATTTTTAGATAAGACCGGTACC  
TTAACGAAAGGAATTCCTTCTGTGATGGGAATCTATCCAATGCCAAATATCTTAAAAATGACGTATTAC  
AAATAGCAGCTTCGCTTGAAAATTGCTCTTCCCATCCTTTAGCTAAGGCTATATTAATGAGGCCAAAGA  
AGAGGGAATTCTTTAAAAATTGTCAAAGAATTAATTCATTTATTGGAAAAGGAGTTACAGGAACAATT  
GATGAAAAGGTTTATTATTTAGGCTCTGCTAACTTTGCAAAAGAAATGGGAATTGAAATCGACCCTGCTT  
TTTCTTCTTGAAGAACAAGGAGAATCACTGGTCTTTGTTTGGACAGACCATCAATTATTAGGCATGAT  
TACCATCATGGATGAGCTAAGAAAGGAAAGTATGGAAGTAATTCGTTTGTGAAATTGAAAGGAATTTAT  
CCCATCCTTTAACTGGAGATCGAAAATATGTTGCTGAACTATTGCAAAAAAATTGGGGATTGAAGATG  
CGCGGTTTGAATTGCTTCCAGACGATAAAATGCAGATTATCCGAGAAGCTAAAAATAGTGGAAAAGTAGG  
AATGATTGGAGACGGAATTAACGATGCTCCAGCCCTTGCAGAAGCTGATGTGAGTTTTGCTCTTGCCTTT  
GGTAGCGATATTGCTATTGAAGTCGCTGATATTACTTTAATACGAAATGATTTAATGAGTTTAGTGGACG  
CTATAGATCTTTCCAGCAAACCATGCGTAAAATGAAATATAATTTATTTTTAGCATTATTTATAATGT  
TCTTGCGATTCTTTGGCAGCTTTTGGACTACTTAATCCAATGATTGCGGCAGGAACAATGGCAATGAGC  
TCTGTTTCTGTGATCGCCAATGCGTTATTACTACGTTATTGGAAGCCAGAAATAAATAGAAATAATGTGG  
AGAGGATTGTCAAAGTTTAA

>gi|338731896:106931-109072 Simkania negevensis Z chromosome gsn.131, complete  
sequence116

ATGGCTCATTTTGATTTACATATTCGGAATATGAATTGCTCTTCTTGCATTGCGAAAATTGAAGGGCGTG  
TGACGAAGATTGAAGGAACAATCAGTTGCTCTGTTAATTTTGAACAGGACAAGCCCGAGTCGAATATGA  
AGAAGGAAACGACATCAAACAAACGGTTGCCGATGCCATTACTGAATTGGGGTATCCAGCAACAGTCATT  
GAAGAAGGGCAGGTTTACGACGAAGAAAAGGATCGCTCTTTTTTTGGCTCAAAGTTCGCACCATTTTTG  
CTATTGTTTTAACCTTCTCTCACCGTTCCAATGTTGGGGGAATTTTTTGAATCGACGTTTTGTTTCC  
CCATTGGATTCAGCTCATTTTGGCAACAATCGTTCAGTTTGGCGCAGGCTACTTTTTACATTGGATCT  
TGGAAGGCGATTAAAAATAAGGCGGCCAACATGGATGTTCTTGTGCACTGGGGACAACAGCCGCCTTTT  
TGTTTAGTGCAGTTGTCGTCCTTTTTCATGTTTCAAGGTTACCTCTACTTTGAAACGAGTACGGTATTAAT  
TTCATGATATTACTCGGACGAGTTATTGAACAGCACTCTAAACACAACGCTCAAGGGGGAATGAAAGCG  
TTGCTCAAATGCAGGCCAAATCGGCCCGCATTAAAAAGGGAAGTGGTGTGAAAGTTCCAATTGATG

CAGTGCACAAAGGAGATATTGTAGTTGTCAAGCCAGGAGAACGGATTCCAGTCGATGGAGAAGTTGTTGA  
CGGAGAGTCTCATGTGATGAATCGATGCTAACAGGAGAAAGCATGCCTGTGCGAAAAGACAAAGGGGAA  
AACGCTTATGCCGGAACAATCAATGGGGAAGGCATGATCGAAGTCCAATCCTCTCGTTTGGGAAAAGAAA  
CCAGTTTGGGCAACATCATTCTGTCTTGTGGAAGAAGCTCAACGTTCAAAAGCCCCTATCCAAAAATTGGC  
CGATCGGATTTAGGGGTGTTTGTGCCGATTGTTTTAGGGATTGCGATTCTCACTTTTTTCTTGTGGGGG  
TTTGTGTCAGGTGACTGGCAAGAGGGACTGATCAGCGGCATTGCTGTTCTCGTTATTGCATGCCCTTGCG  
CCCTTGGCTTGGCCACTCCGACTGTGATTATGGTCGCATGTGGTCGGGGTGCACGTGAAGGCATCTTAAT  
CAAAGATGCTGTCCGCTTGGAAAAGGCTGGAAAACCTTGATGCCATTATCGTCGATAAGACAGGAACAGTG  
ACTGAGGGAAAACCTTCTGTGATGAAATCACGTCTGAAGATGACAACCTTTTGCGAAAAGCAGTTAGCT  
TGACAACCCACTCTGATCACCCATTTCAAAGCCATTACAAATCATGCCAAAGATCAGGGGGTGCAAAT  
TCAAAGATGCGAAGCTTTCCATTCTCATACTGGGCAAGGACTCAGCGGCAGTTTTTCAAGGAAAGGCTTAC  
TTACTTGGCTCGGTTTCGCTTTATGAAGCAGCAAACATCGATCTTGGCCATTCAATGATAAGTTGCAGA  
CCGATGTCCGTGTGATTGCAGCCATTGCGGAAGAAGGAAAGTGCATTGGATTTCATCGCACTTGCCGATAA  
ACTGAAAGAGGGAAGCCAAGAAGCGGTTGCAAACTTCATCAGATGAAGAAAGAAGTCTATTTACTCAGC  
GGAGATCGGAAAGCTGTGGTGGAAATCTGTTGGAAAGATGCTGAATGTCGATGGCTTGTTCAGAAAGTCT  
TACCCGAAGAGAAGGCCTCATATGTCAAGAGACTTCAAGATGAAAAGAAGGTCACGGGAATGGTCGGTGA  
TGGGGTGAATGATGCTCCTGCCCTTGTGTTGCCGATGTAGGCTTTGCGATTGCTGATGGTACAGATGTT  
GCGATGGAAAGTGCCTCTATTGGACTCATGCACAGTAGCCTCTTGAATCTTCTGACAGCGCTATCTCTTT  
CAAAGGTGACCTTTTTGAAAATTCGGCAAATCTCTTCTTTGCCTTTGTCTACAACCTGTGTGGGCATTCC  
TTTAGCAGCCTTTGGGCTGCTCAATCCTATGATTGCCGGTGCCGCATGGCAATGAGCTCGATCTCAGTG  
GTTCTTAACTCTTACACTTCAGCGTAAAAAGCTTTTTTAA

>gi|225871699:c765048-763015 Acidobacterium capsulatum ATCC 51196 chromosome, complete genome117

ATGTCCGCTGCTGACCGATCCATCCCTGAACTCGTCCCATCTCGCGCCGCCGCTTCGTGCAGGGCATCG  
CCGCCGGAGCCGCATCGCCGCTCTCGACGGGCACGCTCTGCCACCTTCGCGGAAGCCGCCCGTATCA  
TCCGCTGTCTCGCCGAACGCACTTCGACCTACCATCGACACGCTGCCGTCAACTTCACCGGCCGC  
CGCGCCCGCGCCCTGGCCGTCAACGGCTCGGTGCCTGGCCCTACGCTGCGCTGGCGCCAGGGCGACACCG  
TGAGCATCGCCGTACTAATCGCATGCGCGTGCCACCTCCGTGCACTGGCATTCTTTCGCTCTGCCCAA

CCCCATGGATGGCGTCCCCGGCCTCACCTATCGCGGCATCATGCCGGCGAAACCTTCCACTACCGCTT  
CCCGTGCTCCAGAACGGCACCGCCTGGTACCACAGCCACACGCGCTTCAAGAGCAGAGCGGCCTCAGCG  
GAGCCATCATCATCGATCCGCGCGGCACAGACCCCGTCCAGGCCGATCGCGATTACGTCATCTTTCTCTC  
CGATTGGACAGATACCAATCCCGAAACCGTCTTCAGCAACCTCAAAGAGAACAGTGACTATTACAATTAC  
GAGCGCATCACCGCCGGCGGCTTCTTCCATCAGGCAAAGCAGCAGGGCCTCGGCAAAGCCATCTCCGCAC  
GCCTCGCCTGGGCGCGCATGAACATGAGCCCCAGTGACATCTCTGACGTCTCCGGCGCCACCTACACCTA  
TCTGCTCAACGGCAACAGCCCCGCCGCAACTGGACCGGCCTTCCAGCGCGGGCGAAAAGCTCCGCCTG  
CGTTTCATCAACGGCTCGTCCATGACCTTCTTTGACGTCCGCATCCCAGGCCTCAAATGACCGTCGTGC  
AGGCCGACGGCAACTACGTCGAGCCGGTGCCCGTCGATGAATTCCGCATCGGCGTTGCCGAGCGCTACGA  
CGTGCTCATCGAGCCGGAGGACAACCGCGCCTACACCATCTTTGCCAGTCGGAAGATCGCAGCGGCTAC  
GCGCGCGGCACCCTCGCCCCACGCCCCGGCATGACCGCTCCCGTTCGGCCCATGGACCCCGTCCCTCGCC  
GCACCATGGCCGACATGGGCATGGCCATGAAAATGAACATGAGCGGCATGGCCTCCATGGCCGGCATCGA  
CGGCATGACCGCCAAAGACGCTCAAGGCATGGACGTCCAGAAAATGAACGCCAGAAAATCAACCAAGAC  
ATGCCCGGAATGAACATGCCCGGTGGAAGCATGTCTGAGATGAACATGCGCAGCGAAATGTCCGGCATGA  
AGATGCGCGGCAACAGTATGCCTGGCATGGCAATGTCCGCCATGACGGCTGAAGAATCCCCGGAACCTCC  
GCCATTCCCGGCAGCTTCGGCAAGACACCCTTTCCGCAGCCCTGGACCGACACCATCCTGCCGCAAAC  
GTGCCTGAAAGCGCCATCCACGCGGCTGAGGCAAAGCTCCAGCCCGCCGATCCCGTTCATCTGCATCCCG  
GCCCCAGGTCGCCGAGGTCGCCCGCCACGTCGAGAGCCGCTCAACCAACCCGGTGACGGACTCAACCA  
CAACGGCCGCGCGTGTCTACCTACGCCGATCTGCGCGCCCGTTTTTCGCGGCGTCGATGACCGCCCCGCC  
ACGCGCGAAATCGAGCTGCACCTCACCGGCAACATGAACCGCTACATCTGGGGCTTCAACGGAGAAAAT  
TCAGCCAGGCCGAGCCATCGTCTGCGTCTCGGCGAGCGTTCGCTTCGTGCTCATCAACGACACCAT  
GATGGAGCACCCATCCACCTCCACGGCCTCTGGAGCGAGCTCGAAAACGGCCACGGCCCTACCGCCCC  
TTCAAAGACACCATCATCGTCAAGCCCGCCGAGCGCGTCAGCTACCTCGTCAGTGCCGACACGCCCGGCC  
GCTGGGCCTACCACTGCCACCTGCTCTACCACATGGAGGCAGGCATGTTCCGCACCGTGGTGGTGCTCCC  
GTGA

>gi|94967031:c2545752-2544004 Candidatus Koribacter versatilis Ellin345 chromosome, complete genome\_118

ATGTTCCGTTGGCTGTCTTCCCTTTTCGCTTCACATTCCTTCTATCCCGCGCTGGCTCGTGCTGCCA

CCGAGGCCTGCCCTCGTCCCGCGCTAGGTAGCGTGGTGCAGGAGCCGCCTGATCTCTTTAGCCATAACGG  
CGTTCTTGAATTGACTCTGACGGCACGCAACGCTGCTGCCACCAACGGCTCCGCGCGGTACTGCTTCATC  
GATGCCAGCGGCAACGAGTCGCCCACTGCGCGTGAAGCCCGCGATCTGGTTACCATCCATCTGAAGA  
ACGAACTGACGAACATCACGCCGATAAAACATCGCCACACCAGCACCATGCCTCCGCCTCGACCGGTCC  
TTGTACCGGAGGGGCAATGACGCCGGTGACCACGAATCTCCATTTTCATGGGCTGACCATCCCGCCCACG  
TGCCACCAGGATGAGGTGCTGCAGACACTGATCCACCCCGGTGATCCGGTCTTCGATTACAGCTTTCGCA  
TTCCCGACGACGAGCCTCCCGGGCTCTACTGGTATCACCCGCACGTGCACGGCTTCAGCCGCGTCGAACT  
GCTGGGTGGGGCCTCGGGCGCATTGATTGTGGAAGGCACTGAGCGTGCCGATCGCGCTGTGGCGGGACTA  
CCCGAGCGAGTCTTCGTGATTCGCGACCAGGATCTGGTCAATCCCAATGCACCGTCCGCGAAATCGGAAC  
CGGTGATTCCGAAATTCCTGCTCGACAACGATGGCGATGCGGTGAATACCGGCACCGGCTTCGGCAAGCC  
CGCCAAAGATCTCTCGATCAACTTCGTCACGGTGCCTTACCCGAACTACGAACCAGCAACCATTCTCATG  
AAGCCGGGGGAACGCCAGCTTTGGCGAGTGCTCAACGCTTCGGCGATCACCTATCTCAATCTCTCGATTT  
TGCGTAACCGCGCAGCGCAGCGCGTGGGATTGATCGCGATTGATGGAGTGCCCCTGAATCTTAACGGAGG  
TCCTGCCGACTTTGTCGATTGGCAAACCTCACATCGGATTGCCGCCCGAAGCCGGGCTGAGTTCATCGTC  
GAAGCGCCGGAGGCTGGCGTCAGCGAGGCCTTCGTCACACATACTGTGGACACAGGCCAGGCGGCGAGA  
ACGATCCCAATCGGCCGCTGGCGATCATTGATCTTCAGCCGATGCGCCCGAGCCGCGCGTAAAGCTAGA  
TGCTGCGCCGCAACCGCTTCGGCCCCCAAACAACCATGGCTCGGCAGCGTGGCGCCGACGCAGGTCCGC  
AAGTTCTACTTTTCGGAAAAGCTCGACGACCCTAACAAATCCCGCGAGCGCCAGTGAGTTCTACATTACGG  
AGGAAGGCCACACGCCACGCGCCTTCGATCCAACTCCAAGCAGCCCGATGTCACCGTGACGCAAGGCAC  
TGTCGAAGACTGGATCATCGAGAACCGCTCCTCTGAACTTCACGCGTTCCACATTACCAGTTGCATTTCC  
ATGCTGCTTGATTACGACGGCAAGACCGTGAACGAGCCGTTCTGCGCGACATCGTAAACGTGCCGTATT  
TCAACGGACACACACTGTCGTATCCAGCATTGCGATTGCGATGGATTTTCGCGATCCGAACATCGTGGG  
AACATTCGCGTTTCATTGCCATCTCCTCGAGCATGAAGATCGCGGAATGATGGCAACGATTCAAGTTGTG  
CCGAGCGAGACTACGAGAAATACCCCGTCAAAGCGGCCTTAGACGCACCAAAGGTGTGGCGCGGTAG  
>gi|374308961:2638157-2639833 Granulicella mallensis MP5ACTX8 chromosome, complete  
genome\_119  
GTGCTCGCCACAGCCGCCTGCGTGACTTTTTCCCTGGAGGCGCAAACCTGCGTTATGTCGCCCGCCTGCAC  
CCGGAAGCGTCGTCGCCGAGCCGGAGCAGGTGCGCAGCCGTAATGGACTCCTGGAGTTCGACCTGAACTT

CAAAAACATGCAGGATGCCGACGGCCAGGAGGAGTACTGCTATCAATCGTCCAACGGCGGTGATCTCCC  
ACGTTGAGGGTTCAGCCGGGAGACAAGCTCGTTCTCCATCTCAAGAACTCGCTGAAGCTCGAGCCAGGCG  
CCGTGAATCCGATGCCGCACTCCGTGGGCATGCCGATCGAATCACCGTGCGCGGACGCGCAGATGACGGC  
ATCCTCGACGAACCTGCATTTCCACGGAATGAACGTTCTGCTTCTTGCGGTCAGGATGATGTCATGCAC  
ACGGCGATCTCACCGAAGAACTCGCCGTTACCTATCACTTGACGATTCCGGTCGACCAGCCCCGGGAT  
TGACTGGTATCACCCGCATCTCCATGGGTTGACGAATGCGCAGGTGTCCGGCGGAGGTTCCGGGCGCAAT  
TGTGGTGAAGGCATCGAGCGCGCAACCGGCTGGTAGCGGGCATGCATGAACGCACCCTCGTGATTGCG  
GACCAGTACCTCATCCATCCCAACTCGCAACAGACTGGGCCGGACTTACGCCGCCGTCTTTCGCGATG  
CTGAAGGGGACATTCTTAATACGGGGACGGGAGGAGGGAAGCCGTGCGCGATCTCTCCATCAACTTTGT  
TCCAGTACCCTGGCCGGACTATCCGCCTGCGAAGATTCTCAGCAGGCCGAACGACCGGCAGTTGTGGCGC  
GTCCTCAACGCCTCGTCGCTTACGTTCTGGATCTGCAGATCGTCGTGGCCGGCAAACCACAGTCGATTG  
GGTAGTGTGCTCGATGGAGTGCCCATCGACGAGAACGGGCTTACGCCGGACCGCGTTTTTTGGACGGA  
CCATATCTTTCTGCCTCCCGCTGCACGAGCGGAGTTCATCGTTAAGGGGATGCCCGCAGGCACACAAGCG  
CAGTTCATTACGCGCAGCGTGGATACGGGGCCTGCCGGTGAGAACGATCCCGTGCGCCCTCTTGCAGATG  
TCGTGTTACAGACCAGGCGCCGGATTTGCTCGCGCTGCCGTCTCAGCGGATCCGAGGTCTCGCCCGAG  
TCAGATATGGATCGGCAACGTCCAACCCGCACGGACGCGCAAGCTCTACTTCTCTGAGCAGCCGTCCGAC  
CCGAACCGGCCGGACAGCCCAACGGTCTTCATGCTCACCGTGGAAGGCAAGCCGGCTGCTCCGTTCAATC  
CGCACCAGACCGAGCCTGATATCGTCGCGCGCAGGGAGACGTCGAGGACTGGGTCATCGAAAATCGTTC  
TACGGAAGCGCATGCCTTCCACATTCACCAGGTCCACTTCATGCTCACGCAATGGAACGGCGTTGCCGTT  
GATGAACCTTTTCTGCGAGACCCATCAACGTTCCGTAAGGCGAGGCCCGGCACACCGTACCCGAGCA  
TCACCCTACGCATGGACTTTGAGATCCGAATGTAGTGGGAACCTTCATGTATCACTGTCATCTCCTTGA  
ACATGAAGATGGAGGGATGATGGGGGTGTTGCGCGTTTTGCCTCGAATGGATGACAGAACAAATTGA  
>gi|383760955:c2651622-2649541 *Caldilinea aerophila* DSM 14535 = NBRC 104270, complete  
genome\_120

ATGGCTGAACTGCAAACGCTCGAAGTTCCTGTCAAAGGCATGGACTGTGCGGAATGCACGCTGCACGTT  
AACAGGCCATCGCCAGACTGCCAGGCGTGGAGTCGGTCAACGTTCTGCTTACTACCGAAAAAGCCGTCAT  
TCAACTCGACCCTGCTCGCGTCGACTTGTCCGCTATTCGTAAAGCCGTAGAGAGCGCGGGTTATTCCGTT  
CCTGACTCGGCCACGCCGCTGGCTACTTCTATGGACAGCTTCAATCGCCGGATGACGGTATTGCTTGCCA

TCGTGTTTAGCGTTGTTCTGAGTATCGTGATTGCCGGCGAATGGCTTGGCCTGTTTCGATGAACTGAATGA  
ACTTGTCCCCCTTCCATTGGCACTGCCCTTGTATTGTAGGCGGCTTTCCGATCTTCCGGAATGTTGTA  
CGAGCTACTCTAAAGCGGCAAATCACCTCGCATACTGATGACAGTTGGAGCGATTGCGGCCCTCATCG  
TTGGTGAATGGGTAGCAGCGGCGATTGTTGTGGTGTTCATGCGTGTGGGCGATTATGTCGAACGCTTTAC  
CACGGAAAGCGCCCGCCGCGCCGTGAAAGAACTCACGGCAATGGCGCCACAAACCGCACGCGTGGAACGA  
GACGGTATAGAAGTGAAGTGCCGGTAGCTGAAGTGAGCGTTGGCGAAATCGTCATCGTTCCGCCCCGGCG  
AGAAGATTCCGGTGGATGGCGAAGTCATCGCCGGACATGCCACGATTGATCAGGCAACCATCACCGGCGA  
ATCTATGCCCGTTGAAGTGGCAAAGGGTTCGCATGTGTTGCTGCTACCATTGCGAAGCTGGGCAGTCTG  
CGCGTGAAAACGCTCCGCACCGGCACAGATAACAAGTTGGACGCGTGATCAAGATGGTGAAGAAGCCG  
AAGCCCATCGCGGCGATGTGCAACGCCTTGCCGACAAGTTCAGCGCATACTATCTGCCGATTGTCGTTGG  
AATTGCTGCGCTCACCTTTCTCATCAGCGGCAATGCCCTGGCTACGGCTGCCGTTCTCGTGGTGGCCTGT  
TCCTGCTCCTTTGCTTTGGCCACGCCCCGTCGCCATGCTGGCGTCCATAGGCGCAAGCGCAAAGCACGGCC  
TGCTGATTAAAGGCGGCAAGTATCTTGAAGCGTTGGTGCAGCGGATGTGGTGTGGTAGATAAAACCGG  
CACGCTCACGTTGGGTCAACCGCAAATCACCGAAGTGGTTCGCTCAACGGTATGCCCTCCTCTGAAATT  
CTTGCCCTTGC GGCTTCTGCTGAACGTTATTCCGGAACATCCCCTGGCTGAAGCCGTACGCGCCGCCGCC  
GCGCTCAAAACCTACCGCTCGCCGAACCGCAAGATTTTGAAGCCCTGCCCGGCATGGGCGTTCCGGCATG  
GGTGAATGGCTACACAGTTGCCGTCGAAACCGTCGTCTGATCCCGGCGACAGAATCCTTGCCGATCGCT  
CAACAACCTGGAAGCGCAGGGTAAAACGCTCCTGTGGGTTGCCCTGGATGGTGAACCTGCCGCCATTCTTG  
CTGCCGCCGATGCGCTCCGTCATGAAGTGCCCGCCGCTTTTCCGAACTGCGTAACCTTGGCATCAAGCA  
TGTGGAACCTGCTCACAGGTGATCATGAACGCACCGCGGCCGCGCTTGTGCAAGTCTCGGTATCCAATAT  
CGCGCCACCTCCTGCCCGAACATAAGATTGACGTTGTAAGGACTATCAAGCCAAAGGACATACGGTTA  
TCATGGTAGGAGATGGCGTAAACGACGCCCCGGCGCTGGCGCAGGCGAATGTTGGCATCGCCATGGGCGC  
GGCAGGTACAGACATCGCCATTGAAGCGGCGCATATAGCCCTGATGCGTGAAGACTGGGCGCTGATCCCC  
GAAGTGTTACGAATCGCCCGCCGACAATGGGCGTAGTCAAGATGAACATCGCCTTTACAGCGCTGTATA  
ACCTGTTCCGGCTGACGCTGGCTGCCGTGGGCATCTTACCGCTACCCTGGCAGCGGCAGCCCAGTCCTT  
GCCAGATTTGGGCATCCTTGCCAATTCGGCGCGGCTGCTGCGACAAAGGTAA

>gi|561112193:775989-778475 Dehalococcoides mccartyi GY50, complete genome\_121

ATGTCTGAAAATAAGCGGCCGGATGCTCTGCCCAAGATAATTATAGGTATAAGCGGCATGTCATGTACCA  
GATGTGCCGCCAGCATCGAAGCGCGTTTATCAAAAACGGCTGGTGAATAAACCCCTAAACTTAATTTTGC  
CTCCGGTAAGCTCATTTTTAGTTATGATCCGTCTGTTATCAATCTGTCAGATATAAAGGCCATTATTACC  
GATTTAGGTTACGGTATTATCAGTAATAAATCTATTTTCCCATAAAAGGCCTTCATTGTACGTCCTGTG  
CAGCCAGAGCCGAAAAGGCTCTGATAAATACAAGCGGTGAATTAATGCAGGTGTTAATCTGGCCAACCA  
GACTGCCAGCATAGAATATCTGGATTATATTTCTTTCCGCGAACTCAGCCAGTCCATAAGCAATATCGGC  
TATGAACTATTGCCGAAGAAACACCTCGGGATGAAATTTCTCACTCAGAAGCTACTGAAACCCGGCAAT  
TAAAACGGGAACTTTCAGTAGCTTTGGTGCTGGGAATAAGCCTTATGATTATAGGATTCTTGCCAGCTTT  
TGCGGCAAGGAATTTATTATGTTTTTGCTGGCTACGCCAGTGCAATTCTGGGCGGGACTGCGTTTTTAC  
CGCGGGGCATTTGCCGCCTTGAAAAACCGCACACAGATATGAATACCCTTATAGCGCTGGGTACTIONCCG  
CTGCCTACTTGTATAGTATGATAGCTTTGGTGTTCCCGCCTTTATTTGATTCACCTTTGCTGGAAAAACA  
CTTGATTTTTGATACATCCGCTATGATTATCGCCCTTATCCTGACCGGACGTTTTCTGGAATCCCGTGCT  
AGAGGCCGTACTTCTGATGCCATTCGCCGTTTGATTGGTCTTCAGCCAAGTACAGCCTCAATTATAAAAG  
ACGGCAAAGAAATTTTGTAAGTATAAACGAAGTAATGGCAGGCGACAAAATTATTATCGCCCGGTGA  
AAGACTACCCGTGGACGGGCTGATACTGGAAGGTTATTCCAGCCTGGACGAATCTATGGTAACCGGCGAA  
AGTATTCCGGCTGAAAAAAAAGCGGGGGATAATGTTATCGGCGGTACGTTTAACCAAACAGGTGCGTTCA  
CTTACGAAGCTCAAAGGTGGGAGCGGATACCGCACTTGCCCGTATAATACGGCTGGTTGAGGAAGCTCA  
GGGAAGCAAAGCTCCCATTCAGCGTTTGGCGGATAAAATAGCCTCGGTATTTGTGCCTGTAGTTATAGGA  
ATCTCCGTTTTAACTTTTTATTTTCTGGCTTTTTTTTCGGGCGGAACCTGCCTTCACTTATGCTTTTTTAA  
ACCTTATTACAGTATTGATTATAGCCTGCCCGTGCGCATTAGGTTTGGCCACACCTACAGCCCTTATTGT  
CGGTATGGGCAAAGGAGCTGAGAACGGCATACTTATCCGCAGCGCAGTAGCTCTGGAGAAAATACACAAA  
CTGGATACTATAGTACTGGATAAAACAGGCACACTGACACGCGGCAAACCGGTGTTGAGCAATCTGGTAA  
GCCACCGTTTTGATAAAGATGCCTTTTTAACTCTGGTTGCCTCTGCCGAACAGTTTTCCGAACACCCTTT  
AGCCAAAGCTGTTTTAAAAGAGGCCGGGCGTAAAAAAGCTTCACTTACAAATCCTGCGGAATTTTCAGCT  
TTGCCCGGTGCAGGGTTAAAAGCTACAGTTAACAGCGAGCAGATACTCATAGGAAACACAACCCTGATGC  
AGTCTCATAATATATCTCTGGCCGAATACCAATCTGAAGCTGACAACTTTGGGAAGCGGGTGAAAGCCT  
GATTTTTGTGGCGGCAAACGGGAAACTCGAGGGTATTGTAGCCGTAAGGGATATATTGAAACGGGAATCA



GCTGCCGTTATTTCCGAACATAAAAGCACATAAACTTAATACAATCATGCTAACAGGTGATAATCACCGGG  
CAGCCAAGCGCATTGCAGATGAACTGGGTATAGACCAATACGTAGCTGAAATAAAACCCGAAGACAAATC  
CAAACCTTATAAAGATCTGCAAAACAAAGGCCGTTTAGTAGCTATGGTGGGAGACGGCATAAATGATGCT  
CCGGCACTTGCCAAGGCTGATGTGGGTATCGCCATTGGCACAGGCACCGATATAGCCATGGAAACCGGTG  
ATATTACCCTTATTTCCGGTGACCTTTTTGGCATCACCAAAGCCATCCTGCTCAGCAGGGCGACTTTTAA  
TACCATCCGCCAAAACCTCTTCTGGGCATTTTTCTACAATATCATCCTTATACCCGTAGCTGCAGGTGTA  
CTTTATCTGTTTTTCAGCCAGAACGGTGTTCTCAATCACTGCATTTCTTCTGGGTGAATACGGTTTTTC  
TAAACCTATACTGGCAGCTCTAGCTATGGCTATAAGTTCTCTGACTGTAGTTGGCAATTCCTCCGTTT  
GCGCGGTATAAAACTAAGTACCTATCTAAAGCATTAA

>gi|221635406:216088-217638 Thermomicrobium roseum DSM 5159 plasmid unnamed, complete  
sequence\_122

ATGATGCGCTTTGCTCCATTATTGCTGGCCCGCGCTGGACCCGCCGTGGCCTGTTTCCGGTGATGACTG  
GGAGCGTGCTCCTGGCGGTGGCCTGCAGTCGGCGACCGGTCGCACCCACCCGAGTCCGCAAACGGCTGC  
GGAGCCGACGGTCACGGTGCTGCCGACTCGATCAAGCGGATCAGCAGCCGGTCCGATCCGGGAGTACACC  
ATCGAGGCGGTGGAGGCGGAAATCGAACTCGCTGGTCGGCGGGTGCACAGTTACCTATGGAGGTCAGG  
TTCCGGGTCCGGAGCTGCGTGTTCCGGAGGGCGAGACGCTGCGCGTCCTGCTGGAGAACCGGCTCCCTGA  
GCCGACGACGATCCACTGGCACGGTATCCCGGTCCCAATGCGATGGACGGGGTGCCGGAGGTCACGCAG  
CCAGCGGTTCCGCCTGGAGAGCGCTACCTCTACGAGTTCCCTGTGCCGGTGGCTGGCACGTACTTTTACC  
ACACCCATGTTGGTGTCCAGCTCGATCGGGGGTTGGTGGGTGCACTCATCGTCGAGCCAGGGCACGAGGA  
ACTAGCCTATGACCGCGAGGTGGTGCTGGTCTGACGACTGGCTGGATGGGATCGCCGGGACACCGGAG  
GAAGTGCTGCGGCAGCTGGTCGGTGCTGGCCACGGTGGACACGGCATGGGACATGGGGCGATGCCGGGTG  
GAAGCATGCCTGGCATGGGAACGATGCCCGGAATGACCGGAACGAGCGGTGAGCCGCCGAGGTGCAACC  
GGATCTCGTCTATCCGTTGTACGTGGTCAATGGGCGTCCACTGGAGCATCCCTTCGAGTTCGTGCGCAAG  
CGCGGGGATCTCCTCCGGCTGCGGCTCGTCAACGCGGCATCAGCGATTATCTTCCGCGTCGCGCTCGCTG  
GACATCGTTACCGTCGTGCAGGCCGATGGACAGCCGATCGAGCCGCTCGAAGGGGACGCTCTGCGGAT  
CGGGATGGGTGAGCGGTACGATCTCCTCGTCCGCTTGGACAATCCTGGCATCTGGCCGCTCGTGGCCTGG  
GCCGAAGGGACGGATCGTGCAGCGCAGGCGGTACTGCGCTACGAGGGGGCGAGCGGCCAAGTGCCGGCGA  
GGGTGACGCGACCGCGGGAATTGTCGGGGGAGCTCGTGCACGGGCTGCGCTGTCGGGCGCGCTCGGCGGG

GACGGAGTTCGTTCCCGATGTCGAGCGGCCGATCGTGCTCGGTGGCGGGATGGGTCAGTATGTCTGGACG  
ATCGATGGGCAAGCCTATCCTGCTGCGGAGCCGATCCGGGTGCGGCAGGCCAGCGGGTACGCTTCCGGT  
TGCAGAACATGACGACGATGCCGCATCCCATGCACCTGCACGGTCACTTCTCCGCGTGGGCGAGAGCGC  
GACGGCCCCGGTGCGGGATACCGTGCTCGTCGATCCGATGCGGGAAGTAGTGATGGACTGGATCGCGGAG  
AACCCGGGTCGGTGGGCGTTCCACTGCCATCACCTCTACCACCAGGAAACCGGAATGATGCGGATCGTCG  
AGGTCACCTGA
